# Supplementary material for: A R2R3-MYB Transcription Factor Gene, BpMYB123, Regulates BpLEA14 to Improve Drought Tolerance in Betula platyphylla
Source: Front Plant Sci. 2021 Dec 10;12:791390. doi: 10.3389/fpls.2021.791390 (PMC8702527; doi:10.3389/fpls.2021.791390)
Supplement: Supplementary file 5 [file Table_2.xlsx]

## Sheet: Supplementary_table2
GeneID	log2FoldChange	pvalue	padj	query	seed_ortholog	evalue	score	eggNOG_OGs	max_annot_lvl	COG_category	Description	Preferred_name	GOs	EC	KEGG_ko	KEGG_Pathway	KEGG_Module	KEGG_Reaction	KEGG_rclass	BRITE	KEGG_TC	CAZy	BiGG_Reaction	PFAMs
BPChr08G07663	7.94782	3.20933e-34	1.42881e-31	BPChr08G07663	3988.XP_002510814.1	3.7e-25	120.9	2DZS0@1|root,2S78U@2759|Eukaryota,37WZ9@33090|Viridiplantae,3GM63@35493|Streptophyta,4JR2W@91835|fabids	35493|Streptophyta	-	-	-	-	-	-	-	-	-	-	-	-	-	-	-
BPChr03G03353	7.11538	2.98247e-32	1.04328e-29	BPChr03G03353	29760.VIT_11s0016g01320.t01	7.6e-72	277.3	COG5147@1|root,KOG0048@2759|Eukaryota,37U4S@33090|Viridiplantae,3GHZB@35493|Streptophyta	35493|Streptophyta	K	transcription	-	-	-	ko:K09422	-	-	-	-	ko00000,ko03000	-	-	-	Myb_DNA-binding
BPChr11G26906	6.80512	1.23287e-38	7.3184e-36	BPChr11G26906	29760.VIT_19s0177g00280.t01	6.8e-120	437.2	COG0484@1|root,KOG0716@2759|Eukaryota,37SJK@33090|Viridiplantae,3G86X@35493|Streptophyta	35493|Streptophyta	O	4Fe-4S single cluster domain	-	-	-	-	-	-	-	-	-	-	-	-	DnaJ,Fer4_13,Fer4_15
BPChr04G32265	6.42637	0.00449386	0.0385759	BPChr04G32265	3711.Bra001561.1-P	2.3e-44	184.9	COG2124@1|root,KOG0157@2759|Eukaryota,37IXF@33090|Viridiplantae,3G9DS@35493|Streptophyta,3HZGR@3699|Brassicales	35493|Streptophyta	IQ	cytochrome P450	-	-	-	ko:K10717,ko:K15638,ko:K20660	ko00908,ko01100,ko01110,map00908,map01100,map01110	-	R08053,R08054,R08055	RC01137	ko00000,ko00001,ko00199	-	-	-	p450
BPChr06G30794	6.23792	4.00522e-179	3.92291e-175	BPChr06G30794	3641.EOY17786	2.4e-29	135.2	2AJ64@1|root,2S43Z@2759|Eukaryota,37WH0@33090|Viridiplantae,3GK1R@35493|Streptophyta	35493|Streptophyta	S	Protein EARLY FLOWERING 4-like	-	GO:0000003,GO:0003006,GO:0003674,GO:0005488,GO:0005515,GO:0005575,GO:0005622,GO:0005623,GO:0005634,GO:0007154,GO:0007165,GO:0007275,GO:0008150,GO:0009314,GO:0009416,GO:0009605,GO:0009628,GO:0009639,GO:0009648,GO:0009649,GO:0009791,GO:0009909,GO:0009987,GO:0010017,GO:0010114,GO:0010228,GO:0022414,GO:0023052,GO:0032501,GO:0032502,GO:0042752,GO:0042753,GO:0042802,GO:0042803,GO:0043226,GO:0043227,GO:…	-	-	-	-	-	-	-	-	-	-	DUF1313
BPChr09G29648	6.12586	5.10483e-33	2.0833e-30	BPChr09G29648	3694.POPTR_0014s02900.1	4.7e-44	184.9	2BG4M@1|root,2S18J@2759|Eukaryota,37VVB@33090|Viridiplantae,3GJBY@35493|Streptophyta,4JQFB@91835|fabids	35493|Streptophyta	S	isoform X1	-	-	-	-	-	-	-	-	-	-	-	-	-
BPChr08G28436	5.62565	1.41334e-70	2.30715e-67	BPChr08G28436	3847.GLYMA05G34530.1	0.0	1113.2	28PPM@1|root,2QWBU@2759|Eukaryota,37R71@33090|Viridiplantae,3GFH6@35493|Streptophyta,4JMXD@91835|fabids	35493|Streptophyta	T	Adagio protein	FKF1	GO:0005575,GO:0005622,GO:0005623,GO:0005634,GO:0005737,GO:0006355,GO:0007623,GO:0008150,GO:0009314,GO:0009416,GO:0009628,GO:0009637,GO:0009889,GO:0009909,GO:0009911,GO:0010468,GO:0010556,GO:0019219,GO:0019222,GO:0031323,GO:0031326,GO:0043226,GO:0043227,GO:0043229,GO:0043231,GO:0044424,GO:0044464,GO:0048511,GO:0048518,GO:0048580,GO:0048582,GO:0048831,GO:0050789,GO:0050793,GO:0050794,GO:0050896,GO:…	-	ko:K12116	ko04712,map04712	-	-	-	ko00000,ko00001,ko04121	-	-	-	F-box,Kelch_2,Kelch_4,PAS_9
BPChr08G28562	5.59444	2.1901e-95	5.36273e-92	BPChr08G28562	3847.GLYMA05G34530.1	5.8e-287	993.0	28PPM@1|root,2QWBU@2759|Eukaryota,37R71@33090|Viridiplantae,3GFH6@35493|Streptophyta,4JMXD@91835|fabids	35493|Streptophyta	T	Adagio protein	FKF1	GO:0005575,GO:0005622,GO:0005623,GO:0005634,GO:0005737,GO:0006355,GO:0007623,GO:0008150,GO:0009314,GO:0009416,GO:0009628,GO:0009637,GO:0009889,GO:0009909,GO:0009911,GO:0010468,GO:0010556,GO:0019219,GO:0019222,GO:0031323,GO:0031326,GO:0043226,GO:0043227,GO:0043229,GO:0043231,GO:0044424,GO:0044464,GO:0048511,GO:0048518,GO:0048580,GO:0048582,GO:0048831,GO:0050789,GO:0050793,GO:0050794,GO:0050896,GO:…	-	ko:K12116	ko04712,map04712	-	-	-	ko00000,ko00001,ko04121	-	-	-	F-box,Kelch_2,Kelch_4,PAS_9
BPChr14G27082	5.55154	7.51905e-86	1.47291e-82	BPChr14G27082	29730.Gorai.009G176400.1	2.1e-175	621.7	COG1635@1|root,KOG2960@2759|Eukaryota,37J38@33090|Viridiplantae,3GDWZ@35493|Streptophyta	35493|Streptophyta	H	Involved in biosynthesis of the thiamine precursor thiazole. Catalyzes the conversion of NAD and glycine to adenosine diphosphate 5-(2-hydroxyethyl)-4-methylthiazole-2-carboxylic acid (ADT), an adenylated thiazole intermediate. The reaction includes an iron-dependent sulfide transfer from a conserved cysteine residue of the protein to a thiazole intermediate. The enzyme can only undergo a single …	-	-	-	ko:K03146	ko00730,ko01100,map00730,map01100	-	R10685	RC00033,RC03253,RC03254	ko00000,ko00001	-	-	-	Thi4
BPChr02G11846	5.42571	5.725e-20	1.09948e-17	BPChr02G11846	225117.XP_009345456.1	4.2e-113	414.1	2CNC2@1|root,2QV4N@2759|Eukaryota,37JRN@33090|Viridiplantae,3GCTB@35493|Streptophyta,4JRPG@91835|fabids	35493|Streptophyta	S	Thaumatin family	-	GO:0002831,GO:0006950,GO:0006952,GO:0008150,GO:0009605,GO:0009607,GO:0009620,GO:0031341,GO:0031343,GO:0031347,GO:0032101,GO:0040008,GO:0042268,GO:0043207,GO:0043900,GO:0043901,GO:0043902,GO:0043903,GO:0044126,GO:0044130,GO:0044144,GO:0044146,GO:0045919,GO:0045926,GO:0048518,GO:0048519,GO:0048522,GO:0048583,GO:0050789,GO:0050794,GO:0050832,GO:0050896,GO:0051704,GO:0051707,GO:0051709,GO:0051710,GO:…	-	-	-	-	-	-	-	-	-	-	Thaumatin
BPChr10G21791	5.03103	1.69483e-23	4.3117e-21	BPChr10G21791	3750.XP_008384739.1	2.4e-57	229.2	COG5641@1|root,KOG1601@2759|Eukaryota,37UC2@33090|Viridiplantae,3GIA4@35493|Streptophyta,4JQFE@91835|fabids	35493|Streptophyta	K	Zinc finger protein CONSTANS-like	-	GO:0005575,GO:0005622,GO:0005623,GO:0005634,GO:0006355,GO:0006605,GO:0006810,GO:0006886,GO:0008104,GO:0008150,GO:0009889,GO:0010468,GO:0010556,GO:0015031,GO:0015833,GO:0019219,GO:0019222,GO:0031323,GO:0031326,GO:0033036,GO:0033365,GO:0034613,GO:0042886,GO:0043226,GO:0043227,GO:0043229,GO:0043231,GO:0044424,GO:0044464,GO:0045036,GO:0045184,GO:0046907,GO:0050789,GO:0050794,GO:0051171,GO:0051179,GO:…	-	-	-	-	-	-	-	-	-	-	CCT
BPChr06G30992	4.91712	6.33441e-20	1.20471e-17	BPChr06G30992	3641.EOY11364	4.3e-60	237.3	COG1028@1|root,KOG0725@2759|Eukaryota,37HIG@33090|Viridiplantae,3GG6F@35493|Streptophyta	35493|Streptophyta	Q	Glucose and ribitol	-	GO:0003674,GO:0003824,GO:0004033,GO:0005575,GO:0005622,GO:0005623,GO:0005737,GO:0008106,GO:0008150,GO:0008152,GO:0009507,GO:0009536,GO:0016491,GO:0016614,GO:0016616,GO:0043226,GO:0043227,GO:0043229,GO:0043231,GO:0044424,GO:0044444,GO:0044464,GO:0055114	-	-	-	-	-	-	-	-	-	-	adh_short_C2
BPChr11G14363	4.81769	8.47423e-43	5.7242e-40	BPChr11G14363	29730.Gorai.003G125200.1	7.2e-53	213.4	2E2GB@1|root,2S2HZ@2759|Eukaryota,37VII@33090|Viridiplantae,3GJVQ@35493|Streptophyta	35493|Streptophyta	-	-	-	-	-	-	-	-	-	-	-	-	-	-	-
BPChr09G19995	4.7213	4.61436e-67	6.02604e-64	BPChr09G19995	3988.XP_002518761.1	6.5e-60	238.0	2C619@1|root,2S3UU@2759|Eukaryota,37WHT@33090|Viridiplantae,3GK45@35493|Streptophyta,4JQHR@91835|fabids	35493|Streptophyta	-	-	-	-	-	-	-	-	-	-	-	-	-	-	-
BPChr10G28308	4.66015	1.03956e-54	1.01819e-51	BPChr10G28308	981085.XP_010091990.1	2.1e-179	635.2	KOG2132@1|root,KOG2132@2759|Eukaryota,37RJP@33090|Viridiplantae,3G7BU@35493|Streptophyta,4JMQ2@91835|fabids	35493|Streptophyta	BT	lysine-specific demethylase	-	GO:0000086,GO:0000278,GO:0003674,GO:0003682,GO:0003700,GO:0003824,GO:0005488,GO:0005575,GO:0005622,GO:0005623,GO:0005634,GO:0005654,GO:0005737,GO:0005829,GO:0006325,GO:0006355,GO:0006464,GO:0006479,GO:0006482,GO:0006807,GO:0006996,GO:0007049,GO:0007623,GO:0008150,GO:0008152,GO:0008168,GO:0008170,GO:0008213,GO:0008214,GO:0008276,GO:0008757,GO:0009889,GO:0009891,GO:0009893,GO:0009987,GO:0010452,GO:…	1.14.11.27	ko:K10277	-	-	-	-	ko00000,ko01000,ko03036	-	-	-	Cupin_8
BPChr10G28244	4.65762	3.90182e-94	8.49253e-91	BPChr10G28244	981085.XP_010091990.1	2.1e-179	635.2	KOG2132@1|root,KOG2132@2759|Eukaryota,37RJP@33090|Viridiplantae,3G7BU@35493|Streptophyta,4JMQ2@91835|fabids	35493|Streptophyta	BT	lysine-specific demethylase	-	GO:0000086,GO:0000278,GO:0003674,GO:0003682,GO:0003700,GO:0003824,GO:0005488,GO:0005575,GO:0005622,GO:0005623,GO:0005634,GO:0005654,GO:0005737,GO:0005829,GO:0006325,GO:0006355,GO:0006464,GO:0006479,GO:0006482,GO:0006807,GO:0006996,GO:0007049,GO:0007623,GO:0008150,GO:0008152,GO:0008168,GO:0008170,GO:0008213,GO:0008214,GO:0008276,GO:0008757,GO:0009889,GO:0009891,GO:0009893,GO:0009987,GO:0010452,GO:…	1.14.11.27	ko:K10277	-	-	-	-	ko00000,ko01000,ko03036	-	-	-	Cupin_8
BPChr06G31173	4.62684	5.54598e-10	3.56198e-08	BPChr06G31173	71139.XP_010025176.1	1e-138	500.0	COG1028@1|root,KOG0725@2759|Eukaryota,37HIG@33090|Viridiplantae,3GG6F@35493|Streptophyta	35493|Streptophyta	Q	Glucose and ribitol	-	-	-	-	-	-	-	-	-	-	-	-	adh_short_C2
BPChr06G30227	4.4643	4.75549e-05	0.00100817	BPChr06G30227	85681.XP_006433301.1	3.4e-51	207.6	COG1028@1|root,KOG0725@2759|Eukaryota,37HIG@33090|Viridiplantae,3GG6F@35493|Streptophyta	35493|Streptophyta	Q	Glucose and ribitol	-	GO:0003674,GO:0003824,GO:0004033,GO:0005575,GO:0005622,GO:0005623,GO:0005737,GO:0008106,GO:0008150,GO:0008152,GO:0009507,GO:0009536,GO:0016491,GO:0016614,GO:0016616,GO:0043226,GO:0043227,GO:0043229,GO:0043231,GO:0044424,GO:0044444,GO:0044464,GO:0055114	-	-	-	-	-	-	-	-	-	-	adh_short_C2
BPChr14G27744	4.39711	9.56076e-14	1.1148e-11	BPChr14G27744	3760.EMJ03175	7.3e-166	590.5	KOG1192@1|root,KOG1192@2759|Eukaryota,37J9T@33090|Viridiplantae,3G9KU@35493|Streptophyta,4JIAC@91835|fabids	35493|Streptophyta	CG	Belongs to the UDP-glycosyltransferase family	DOGT1	GO:0003674,GO:0003824,GO:0005575,GO:0005622,GO:0005623,GO:0006629,GO:0008150,GO:0008152,GO:0008194,GO:0008202,GO:0009058,GO:0009314,GO:0009411,GO:0009416,GO:0009605,GO:0009607,GO:0009628,GO:0009636,GO:0009812,GO:0009813,GO:0010224,GO:0010817,GO:0016128,GO:0016131,GO:0016740,GO:0016757,GO:0016758,GO:0035251,GO:0042221,GO:0042440,GO:0042445,GO:0043207,GO:0043226,GO:0043227,GO:0043229,GO:0043231,GO:…	-	ko:K13496	ko01110,map01110	-	R08076	RC00005,RC00059	ko00000,ko01000,ko01003	-	GT1	-	UDPGT
BPChr07G07722	4.38962	2.44585e-20	4.79117e-18	BPChr07G07722	225117.XP_009360800.1	1.2e-134	486.5	COG1877@1|root,KOG1050@2759|Eukaryota,37MHJ@33090|Viridiplantae,3G81Y@35493|Streptophyta,4JKYD@91835|fabids	35493|Streptophyta	G	Alpha,alpha-trehalose-phosphate synthase UDP-forming 1-like	-	GO:0000003,GO:0003006,GO:0003674,GO:0003824,GO:0003825,GO:0005975,GO:0005984,GO:0005991,GO:0005992,GO:0006793,GO:0006796,GO:0006950,GO:0007154,GO:0007165,GO:0007275,GO:0008150,GO:0008152,GO:0008194,GO:0009058,GO:0009311,GO:0009312,GO:0009743,GO:0009756,GO:0009790,GO:0009791,GO:0009793,GO:0009832,GO:0009987,GO:0010033,GO:0010154,GO:0010182,GO:0016051,GO:0016311,GO:0016740,GO:0016757,GO:0016758,GO:…	2.4.1.15,3.1.3.12	ko:K16055	ko00500,ko01100,map00500,map01100	-	R02737,R02778	RC00005,RC00017,RC00049,RC02748	ko00000,ko00001,ko01000,ko01003	-	GT20	-	Glyco_transf_20,Trehalose_PPase
BPChr06G29277	4.35427	6.47189e-54	6.03704e-51	BPChr06G29277	3847.GLYMA09G38990.2	9e-59	233.0	2AJBI@1|root,2RZ6Q@2759|Eukaryota,37UHN@33090|Viridiplantae,3GIQ7@35493|Streptophyta,4JPF5@91835|fabids	35493|Streptophyta	S	Desiccation protectant protein Lea14 homolog	-	GO:0005575,GO:0005576,GO:0005622,GO:0005623,GO:0005737,GO:0005829,GO:0005886,GO:0006950,GO:0006952,GO:0008150,GO:0009314,GO:0009416,GO:0009605,GO:0009607,GO:0009611,GO:0009620,GO:0009628,GO:0009642,GO:0009644,GO:0016020,GO:0043207,GO:0044424,GO:0044444,GO:0044464,GO:0048046,GO:0050832,GO:0050896,GO:0051704,GO:0051707,GO:0071944,GO:0098542	-	-	-	-	-	-	-	-	-	-	LEA_2
BPChr03G04517	4.19059	1.08437e-23	2.83222e-21	BPChr03G04517	3641.EOX92066	6.4e-223	780.0	KOG1192@1|root,KOG1192@2759|Eukaryota,37HZV@33090|Viridiplantae,3G9TD@35493|Streptophyta	35493|Streptophyta	CG	Belongs to the UDP-glycosyltransferase family	-	GO:0003674,GO:0003824,GO:0005575,GO:0005622,GO:0005623,GO:0008194,GO:0015020,GO:0016740,GO:0016757,GO:0016758,GO:0035251,GO:0043226,GO:0043227,GO:0043229,GO:0043231,GO:0044424,GO:0044464,GO:0046527,GO:0050403,GO:0050502,GO:0080043,GO:0080044	2.4.1.324	ko:K21374	-	-	-	-	ko00000,ko01000,ko01003	-	GT1	-	UDPGT
BPChr12G22335	4.18786	2.62016e-21	5.83253e-19	BPChr12G22335	102107.XP_008234165.1	2.2e-220	771.5	KOG1192@1|root,KOG1192@2759|Eukaryota,37HZV@33090|Viridiplantae,3G9TD@35493|Streptophyta,4JHZ8@91835|fabids	35493|Streptophyta	CG	Belongs to the UDP-glycosyltransferase family	-	GO:0003674,GO:0003824,GO:0005575,GO:0005622,GO:0005623,GO:0008194,GO:0015020,GO:0016740,GO:0016757,GO:0016758,GO:0035251,GO:0043226,GO:0043227,GO:0043229,GO:0043231,GO:0044424,GO:0044464,GO:0046527,GO:0050403,GO:0050502,GO:0080043,GO:0080044	2.4.1.324	ko:K21374	-	-	-	-	ko00000,ko01000,ko01003	-	GT1	-	UDPGT
BPChr07G07731	4.12901	4.16721e-68	6.27934e-65	BPChr07G07731	3760.EMJ15746	0.0	1078.9	COG1877@1|root,KOG1050@2759|Eukaryota,37MHJ@33090|Viridiplantae,3G81Y@35493|Streptophyta,4JKYD@91835|fabids	35493|Streptophyta	G	Alpha,alpha-trehalose-phosphate synthase UDP-forming 1-like	-	GO:0000003,GO:0003006,GO:0003674,GO:0003824,GO:0003825,GO:0005975,GO:0005984,GO:0005991,GO:0005992,GO:0006793,GO:0006796,GO:0006950,GO:0007154,GO:0007165,GO:0007275,GO:0008150,GO:0008152,GO:0008194,GO:0009058,GO:0009311,GO:0009312,GO:0009743,GO:0009756,GO:0009790,GO:0009791,GO:0009793,GO:0009832,GO:0009987,GO:0010033,GO:0010154,GO:0010182,GO:0016051,GO:0016311,GO:0016740,GO:0016757,GO:0016758,GO:…	2.4.1.15,3.1.3.12	ko:K16055	ko00500,ko01100,map00500,map01100	-	R02737,R02778	RC00005,RC00017,RC00049,RC02748	ko00000,ko00001,ko01000,ko01003	-	GT20	-	Glyco_transf_20,Trehalose_PPase
BPChr13G10410	4.12587	9.72952e-71	1.73265e-67	BPChr13G10410	3641.EOY02948	1.4e-254	886.7	KOG2164@1|root,KOG2164@2759|Eukaryota,37NEP@33090|Viridiplantae,3GF9A@35493|Streptophyta	35493|Streptophyta	O	Ring finger protein	-	-	-	-	-	-	-	-	-	-	-	-	zf-C3HC4
BPChr11G05809	4.12571	3.09001e-10	2.06588e-08	BPChr11G05809	4113.PGSC0003DMT400054287	3.4e-10	72.8	2CNED@1|root,2QVMN@2759|Eukaryota,37RYD@33090|Viridiplantae,3GHH8@35493|Streptophyta,44TEI@71274|asterids	35493|Streptophyta	S	F-box domain	-	GO:0003674,GO:0003824,GO:0004842,GO:0005575,GO:0005622,GO:0005623,GO:0005634,GO:0005737,GO:0006464,GO:0006508,GO:0006511,GO:0006807,GO:0008150,GO:0008152,GO:0009056,GO:0009057,GO:0009892,GO:0009894,GO:0009895,GO:0009987,GO:0010498,GO:0010605,GO:0016567,GO:0016740,GO:0019222,GO:0019538,GO:0019787,GO:0019941,GO:0030163,GO:0031146,GO:0031347,GO:0031348,GO:0032446,GO:0036211,GO:0042176,GO:0042177,GO:…	-	-	-	-	-	-	-	-	-	-	F-box,FBA_1
BPChr02G22006	4.07578	5.46104e-05	0.00113083	BPChr02G22006	29760.VIT_02s0154g00380.t01	8.7e-13	80.5	2E28C@1|root,2S9GK@2759|Eukaryota,37WXR@33090|Viridiplantae,3GKTF@35493|Streptophyta	35493|Streptophyta	-	-	-	-	-	-	-	-	-	-	-	-	-	-	-
BPChr10G03520	4.03076	6.23916e-21	1.28651e-18	BPChr10G03520	3694.POPTR_0001s33590.1	1.6e-29	135.6	2CXCX@1|root,2S4KG@2759|Eukaryota,37W72@33090|Viridiplantae,3GKPR@35493|Streptophyta,4JUX6@91835|fabids	35493|Streptophyta	-	-	-	-	-	-	-	-	-	-	-	-	-	-	-
BPChr11G03746	3.9923	1.3658e-45	9.90911e-43	BPChr11G03746	3641.EOX93573	1.8e-149	535.8	28MSX@1|root,2QUBA@2759|Eukaryota,37PF5@33090|Viridiplantae,3G7HX@35493|Streptophyta	35493|Streptophyta	K	Zinc finger protein CONSTANS-like	COL9	GO:0003674,GO:0003700,GO:0005575,GO:0005622,GO:0005623,GO:0005634,GO:0005886,GO:0006355,GO:0007623,GO:0008150,GO:0009889,GO:0010468,GO:0010556,GO:0016020,GO:0019219,GO:0019222,GO:0031323,GO:0031326,GO:0043226,GO:0043227,GO:0043229,GO:0043231,GO:0044424,GO:0044464,GO:0048511,GO:0048519,GO:0048579,GO:0048580,GO:0048581,GO:0048583,GO:0048585,GO:0048586,GO:0050789,GO:0050793,GO:0050794,GO:0051093,GO:…	-	-	-	-	-	-	-	-	-	-	CCT,zf-B_box
BPChr04G16011	3.98629	2.27774e-05	0.000526785	BPChr04G16011	3760.EMJ15121	1.4e-204	719.2	COG2124@1|root,KOG0157@2759|Eukaryota,37IXF@33090|Viridiplantae,3G9DS@35493|Streptophyta,4JRG3@91835|fabids	35493|Streptophyta	Q	Belongs to the cytochrome P450 family	-	GO:0003674,GO:0003824,GO:0004497,GO:0006082,GO:0006629,GO:0006720,GO:0006721,GO:0006722,GO:0008150,GO:0008152,GO:0008299,GO:0008300,GO:0008610,GO:0009056,GO:0009058,GO:0009987,GO:0016042,GO:0016053,GO:0016104,GO:0016105,GO:0016114,GO:0016115,GO:0016491,GO:0016705,GO:0016709,GO:0017144,GO:0019741,GO:0019742,GO:0019745,GO:0019752,GO:0032787,GO:0042180,GO:0042181,GO:0042182,GO:0043436,GO:0044237,GO:…	1.14.13.173,1.14.14.1	ko:K07426,ko:K07428,ko:K10717,ko:K17873,ko:K20660	ko00908,ko01100,ko01110,ko04726,map00908,map01100,map01110,map04726	-	R08053,R08054,R08055	RC01137	ko00000,ko00001,ko00199,ko01000	-	-	-	p450
BPChr01G19037	3.9586	2.68234e-07	1.0467e-05	BPChr01G19037	102107.XP_008223778.1	1.9e-115	422.5	2ECU4@1|root,2SIKN@2759|Eukaryota,37YK3@33090|Viridiplantae,3GHEV@35493|Streptophyta	35493|Streptophyta	S	Belongs to the 'GDSL' lipolytic enzyme family	-	-	-	-	-	-	-	-	-	-	-	-	Lipase_GDSL
BPChr14G27046	3.92455	5.55147e-38	3.19846e-35	BPChr14G27046	3760.EMJ15746	0.0	1543.1	COG1877@1|root,KOG1050@2759|Eukaryota,37MHJ@33090|Viridiplantae,3G81Y@35493|Streptophyta,4JKYD@91835|fabids	35493|Streptophyta	G	Alpha,alpha-trehalose-phosphate synthase UDP-forming 1-like	-	GO:0000003,GO:0003006,GO:0003674,GO:0003824,GO:0003825,GO:0005975,GO:0005984,GO:0005991,GO:0005992,GO:0006793,GO:0006796,GO:0006950,GO:0007154,GO:0007165,GO:0007275,GO:0008150,GO:0008152,GO:0008194,GO:0009058,GO:0009311,GO:0009312,GO:0009743,GO:0009756,GO:0009790,GO:0009791,GO:0009793,GO:0009832,GO:0009987,GO:0010033,GO:0010154,GO:0010182,GO:0016051,GO:0016311,GO:0016740,GO:0016757,GO:0016758,GO:…	2.4.1.15,3.1.3.12	ko:K16055	ko00500,ko01100,map00500,map01100	-	R02737,R02778	RC00005,RC00017,RC00049,RC02748	ko00000,ko00001,ko01000,ko01003	-	GT20	-	Glyco_transf_20,Trehalose_PPase
BPChr08G17101	3.8876	2.95308e-41	1.92826e-38	BPChr08G17101	2711.XP_006483102.1	6.6e-27	127.5	2D0XH@1|root,2S4UI@2759|Eukaryota,37WIF@33090|Viridiplantae,3GK36@35493|Streptophyta	35493|Streptophyta	-	-	-	-	-	-	-	-	-	-	-	-	-	-	-
BPChr06G26101	3.42994	2.14355e-14	2.69167e-12	BPChr06G26101	3760.EMJ21600	4e-154	551.2	COG2453@1|root,KOG1616@1|root,KOG1616@2759|Eukaryota,KOG1716@2759|Eukaryota,37MPD@33090|Viridiplantae,3GFW3@35493|Streptophyta,4JEJ1@91835|fabids	35493|Streptophyta	GV	Phosphoglucan phosphatase DSP4	SEX4	GO:0000272,GO:0001871,GO:0003674,GO:0003824,GO:0005488,GO:0005575,GO:0005622,GO:0005623,GO:0005737,GO:0005975,GO:0005976,GO:0005982,GO:0005983,GO:0006073,GO:0006793,GO:0006796,GO:0008150,GO:0008152,GO:0009056,GO:0009057,GO:0009251,GO:0009507,GO:0009532,GO:0009536,GO:0009570,GO:0009987,GO:0016052,GO:0016311,GO:0016787,GO:0016788,GO:0016791,GO:0019203,GO:0030246,GO:0030247,GO:0042578,GO:0043170,GO:…	-	-	-	-	-	-	-	-	-	-	AMPK1_CBM,DSPc
BPChr08G11248	3.42928	0.000351484	0.00519247	BPChr08G11248	3760.EMJ25852	3.6e-198	698.0	28JSQ@1|root,2QU98@2759|Eukaryota,37T6E@33090|Viridiplantae,3GH3D@35493|Streptophyta,4JSIE@91835|fabids	35493|Streptophyta	G	At1g04910-like	-	-	-	-	-	-	-	-	-	-	-	-	O-FucT
BPChr04G18051	3.39392	4.78112e-07	1.76712e-05	BPChr04G18051	981085.XP_010092742.1	1.2e-208	732.6	COG2124@1|root,KOG0157@2759|Eukaryota,37IXF@33090|Viridiplantae,3G9DS@35493|Streptophyta,4JRG3@91835|fabids	35493|Streptophyta	Q	Belongs to the cytochrome P450 family	-	GO:0003674,GO:0003824,GO:0004497,GO:0006082,GO:0006629,GO:0006720,GO:0006721,GO:0006722,GO:0008150,GO:0008152,GO:0008202,GO:0008299,GO:0008300,GO:0008395,GO:0008610,GO:0009056,GO:0009058,GO:0009719,GO:0009725,GO:0009741,GO:0009987,GO:0010033,GO:0010268,GO:0010817,GO:0014070,GO:0016042,GO:0016053,GO:0016104,GO:0016105,GO:0016114,GO:0016115,GO:0016128,GO:0016131,GO:0016491,GO:0016705,GO:0016709,GO:…	1.14.13.173,1.14.14.1	ko:K07426,ko:K07428,ko:K10717,ko:K17873,ko:K20660	ko00908,ko01100,ko01110,ko04726,map00908,map01100,map01110,map04726	-	R08053,R08054,R08055	RC01137	ko00000,ko00001,ko00199,ko01000	-	-	-	p450
BPChr02G08027	3.28472	6.89415e-26	2.01567e-23	BPChr02G08027	3641.EOY24405	1.4e-135	490.3	28YNA@1|root,2R5G8@2759|Eukaryota,37SZ0@33090|Viridiplantae,3GDPK@35493|Streptophyta	35493|Streptophyta	S	isoform X1	-	-	-	-	-	-	-	-	-	-	-	-	DUF863
BPChr11G18398	3.2715	1.40297e-06	4.57285e-05	BPChr11G18398	102107.XP_008229740.1	1.1e-201	709.5	KOG1192@1|root,KOG1192@2759|Eukaryota,37YWK@33090|Viridiplantae,3GNTU@35493|Streptophyta,4JRBN@91835|fabids	35493|Streptophyta	CG	UDP-Glycosyltransferase	-	-	2.4.1.324	ko:K21374	-	-	-	-	ko00000,ko01000,ko01003	-	GT1	-	UDPGT
BPChr06G11023	3.26374	2.70145e-05	0.000610367	BPChr06G11023	225117.XP_009333712.1	7.4e-190	670.2	28P0B@1|root,2QVKX@2759|Eukaryota,37HTG@33090|Viridiplantae,3GHD5@35493|Streptophyta,4JKY3@91835|fabids	35493|Streptophyta	G	May be involved in modulation of pathogen defense and leaf cell death	-	GO:0002376,GO:0005575,GO:0005623,GO:0005886,GO:0006950,GO:0006952,GO:0006955,GO:0007275,GO:0007568,GO:0008150,GO:0009605,GO:0009607,GO:0009620,GO:0009814,GO:0009817,GO:0010150,GO:0016020,GO:0032501,GO:0032502,GO:0043207,GO:0044464,GO:0045087,GO:0048366,GO:0048367,GO:0048731,GO:0048827,GO:0048856,GO:0050832,GO:0050896,GO:0051704,GO:0051707,GO:0071944,GO:0090693,GO:0098542,GO:0099402	-	ko:K08472	-	-	-	-	ko00000,ko04030	-	-	-	Mlo
BPChr08G10800	3.15593	0.00111605	0.01317	BPChr08G10800	57918.XP_004305140.1	2.8e-132	478.4	KOG1928@1|root,KOG1928@2759|Eukaryota,37Y9F@33090|Viridiplantae,3GNGQ@35493|Streptophyta,4JRP5@91835|fabids	35493|Streptophyta	G	Glycosyltransferase sugar-binding region containing DXD motif	-	-	2.4.1.228	ko:K01988	ko00601,ko00603,ko01100,map00601,map00603,map01100	M00068	R05960,R11375,R11376,R11377	-	ko00000,ko00001,ko00002,ko01000,ko01003	-	GT32	-	Gb3_synth,Gly_transf_sug
BPChr11G14388	3.08893	4.08556e-58	4.44622e-55	BPChr11G14388	29730.Gorai.013G260900.1	0.0	1543.1	COG0058@1|root,KOG2099@2759|Eukaryota,37PPE@33090|Viridiplantae,3GCI5@35493|Streptophyta	35493|Streptophyta	G	Phosphorylase is an important allosteric enzyme in carbohydrate metabolism. Enzymes from different sources differ in their regulatory mechanisms and in their natural substrates. However, all known phosphorylases share catalytic and structural properties	-	GO:0000272,GO:0001101,GO:0003674,GO:0003824,GO:0004645,GO:0005488,GO:0005575,GO:0005622,GO:0005623,GO:0005737,GO:0005829,GO:0005975,GO:0005976,GO:0005977,GO:0005980,GO:0006073,GO:0006091,GO:0006112,GO:0006950,GO:0008144,GO:0008150,GO:0008152,GO:0008184,GO:0009056,GO:0009057,GO:0009251,GO:0009414,GO:0009415,GO:0009507,GO:0009536,GO:0009628,GO:0009987,GO:0010035,GO:0010038,GO:0015980,GO:0016052,GO:…	2.4.1.1	ko:K00688	ko00500,ko01100,ko01110,ko02026,ko04217,ko04910,ko04922,ko04931,map00500,map01100,map01110,map02026,map04217,map04910,map04922,map04931	-	R02111	-	ko00000,ko00001,ko01000	-	GT35	-	Phosphorylase
BPChr11G01787	3.06998	1.44088e-33	6.13597e-31	BPChr11G01787	29760.VIT_06s0004g05120.t01	2.4e-87	328.9	2C4RN@1|root,2RIEW@2759|Eukaryota,37NY2@33090|Viridiplantae,3GDFA@35493|Streptophyta	35493|Streptophyta	K	transcription factor	PCL1	GO:0000156,GO:0000160,GO:0003674,GO:0003700,GO:0005575,GO:0005622,GO:0005623,GO:0005634,GO:0006355,GO:0007154,GO:0007165,GO:0007275,GO:0007568,GO:0007623,GO:0008150,GO:0009653,GO:0009719,GO:0009723,GO:0009725,GO:0009735,GO:0009736,GO:0009755,GO:0009873,GO:0009888,GO:0009889,GO:0009909,GO:0009987,GO:0010015,GO:0010033,GO:0010073,GO:0010075,GO:0010082,GO:0010119,GO:0010150,GO:0010468,GO:0010556,GO:…	-	-	-	-	-	-	-	-	-	-	Myb_DNA-binding
BPChr13G21198	3.04555	8.01891e-05	0.00152604	BPChr13G21198	29760.VIT_18s0001g04430.t01	4.2e-36	159.1	COG2801@1|root,KOG0017@2759|Eukaryota,388W5@33090|Viridiplantae,3GXMS@35493|Streptophyta	35493|Streptophyta	L	transposition, RNA-mediated	-	-	4.2.3.75	ko:K15803	ko00909,map00909	-	R07648	RC02425	ko00000,ko00001,ko01000	-	-	-	Retrotrans_gag,Terpene_synth_C
BPChr08G20396	3.02298	0.00030475	0.00462055	BPChr08G20396	3641.EOX96288	1.9e-115	422.2	KOG4832@1|root,KOG4832@2759|Eukaryota,37TB6@33090|Viridiplantae,3GEZR@35493|Streptophyta	35493|Streptophyta	ADK	Spindle and kinetochore-associated protein 1 homolog	-	-	-	-	-	-	-	-	-	-	-	-	SKA1
BPChr08G11207	2.99356	0.000142398	0.00242982	BPChr08G11207	102107.XP_008224076.1	5.5e-265	920.2	28JSW@1|root,2SJ4F@2759|Eukaryota,37Y6T@33090|Viridiplantae,3GN90@35493|Streptophyta,4JTSI@91835|fabids	35493|Streptophyta	S	Sieve element occlusion	SEOb	-	-	-	-	-	-	-	-	-	-	-	SEO_C,SEO_N
BPunChr33213	2.94264	4.13426e-31	1.42081e-28	BPunChr33213	29760.VIT_06s0004g05120.t01	5.8e-86	324.7	2C4RN@1|root,2RIEW@2759|Eukaryota,37NY2@33090|Viridiplantae,3GDFA@35493|Streptophyta	35493|Streptophyta	K	transcription factor	PCL1	GO:0000156,GO:0000160,GO:0003674,GO:0003700,GO:0005575,GO:0005622,GO:0005623,GO:0005634,GO:0006355,GO:0007154,GO:0007165,GO:0007275,GO:0007568,GO:0007623,GO:0008150,GO:0009653,GO:0009719,GO:0009723,GO:0009725,GO:0009735,GO:0009736,GO:0009755,GO:0009873,GO:0009888,GO:0009889,GO:0009909,GO:0009987,GO:0010015,GO:0010033,GO:0010073,GO:0010075,GO:0010082,GO:0010119,GO:0010150,GO:0010468,GO:0010556,GO:…	-	-	-	-	-	-	-	-	-	-	Myb_DNA-binding
BPChr07G24818	2.9335	0.00100512	0.0121016	BPChr07G24818	102107.XP_008221640.1	4.2e-221	774.2	COG1404@1|root,2QVIY@2759|Eukaryota,37HQ8@33090|Viridiplantae,3GCXK@35493|Streptophyta,4JKAH@91835|fabids	35493|Streptophyta	O	Subtilase family	-	GO:0000003,GO:0003674,GO:0003824,GO:0004175,GO:0004252,GO:0006508,GO:0006807,GO:0008150,GO:0008152,GO:0008233,GO:0008236,GO:0009566,GO:0009567,GO:0016787,GO:0017171,GO:0019538,GO:0019953,GO:0022414,GO:0043170,GO:0044238,GO:0044703,GO:0051704,GO:0070011,GO:0071704,GO:0140096,GO:1901564	-	-	-	-	-	-	-	-	-	-	Inhibitor_I9,Peptidase_S8
BPChr03G28938	2.8158	9.17571e-07	3.14786e-05	BPChr03G28938	3760.EMJ15882	1.6e-16	92.4	28NRM@1|root,2QVBP@2759|Eukaryota,37QAQ@33090|Viridiplantae,3GD2R@35493|Streptophyta,4JF61@91835|fabids	35493|Streptophyta	S	Polyphenol oxidase	-	GO:0005575,GO:0005622,GO:0005623,GO:0005737,GO:0009507,GO:0009534,GO:0009536,GO:0009543,GO:0009579,GO:0031976,GO:0031977,GO:0031978,GO:0031984,GO:0043226,GO:0043227,GO:0043229,GO:0043231,GO:0044422,GO:0044424,GO:0044434,GO:0044435,GO:0044436,GO:0044444,GO:0044446,GO:0044464	1.10.3.1	ko:K00422	ko00350,ko00950,ko01100,ko01110,map00350,map00950,map01100,map01110	-	R00031,R00045,R02078	RC00046,RC00180	ko00000,ko00001,ko01000	-	-	-	PPO1_DWL,PPO1_KFDV,Tyrosinase
BPChr07G32007	2.78293	1.25816e-11	1.08573e-09	BPChr07G32007	3694.POPTR_0011s01520.1	2e-69	269.6	2ATNI@1|root,2RZSC@2759|Eukaryota,37UXK@33090|Viridiplantae,3GIAI@35493|Streptophyta,4JP8E@91835|fabids	35493|Streptophyta	S	RbcX protein	-	GO:0001101,GO:0003674,GO:0005488,GO:0005515,GO:0005575,GO:0005622,GO:0005623,GO:0005737,GO:0006457,GO:0006950,GO:0006970,GO:0008150,GO:0009266,GO:0009409,GO:0009414,GO:0009415,GO:0009507,GO:0009534,GO:0009536,GO:0009579,GO:0009628,GO:0009651,GO:0009987,GO:0010035,GO:0031976,GO:0031984,GO:0042221,GO:0043226,GO:0043227,GO:0043229,GO:0043231,GO:0044183,GO:0044422,GO:0044424,GO:0044434,GO:0044435,GO:…	-	-	-	-	-	-	-	-	-	-	RcbX
BPChr08G25542	2.74201	0.000347347	0.00513911	BPChr08G25542	225117.XP_009359183.1	3e-35	154.8	COG0574@1|root,2QQ6R@2759|Eukaryota,37KSG@33090|Viridiplantae,3GDUC@35493|Streptophyta,4JEYT@91835|fabids	35493|Streptophyta	G	Alpha-glucan water dikinase	-	GO:0000272,GO:0003674,GO:0003824,GO:0005575,GO:0005622,GO:0005623,GO:0005737,GO:0005739,GO:0005975,GO:0005976,GO:0005982,GO:0005983,GO:0006073,GO:0006793,GO:0006796,GO:0006950,GO:0008150,GO:0008152,GO:0009056,GO:0009057,GO:0009251,GO:0009266,GO:0009409,GO:0009507,GO:0009526,GO:0009532,GO:0009536,GO:0009570,GO:0009605,GO:0009607,GO:0009608,GO:0009610,GO:0009620,GO:0009628,GO:0009631,GO:0009941,GO:…	2.7.9.4	ko:K08244	-	-	-	-	ko00000,ko01000	-	-	-	PPDK_N
BPChr08G31881	2.72501	3.62394e-36	1.91863e-33	BPChr08G31881	981085.XP_010099422.1	4.2e-202	711.4	COG5641@1|root,KOG1601@2759|Eukaryota,37R8H@33090|Viridiplantae,3G75E@35493|Streptophyta,4JK8I@91835|fabids	35493|Streptophyta	K	Two-component response regulator-like	-	-	-	ko:K12130	ko04712,map04712	-	-	-	ko00000,ko00001	-	-	-	CCT,Response_reg
BPChr05G14425	2.70897	3.14963e-23	7.91001e-21	BPChr05G14425	3641.EOX95243	9.1e-62	243.0	COG0589@1|root,2RYEB@2759|Eukaryota,37UZJ@33090|Viridiplantae,3GJ4T@35493|Streptophyta	35493|Streptophyta	T	Universal stress protein	-	GO:0000166,GO:0003674,GO:0005488,GO:0005575,GO:0005623,GO:0005886,GO:0008144,GO:0016020,GO:0016208,GO:0017076,GO:0030554,GO:0032553,GO:0032555,GO:0032559,GO:0036094,GO:0043167,GO:0043168,GO:0043169,GO:0044464,GO:0071944,GO:0097159,GO:0097367,GO:1901265,GO:1901363	-	-	-	-	-	-	-	-	-	-	Usp
BPChr05G17559	2.66356	2.22421e-66	2.72313e-63	BPChr05G17559	3694.POPTR_0008s07820.1	9.1e-146	523.1	COG0440@1|root,KOG2663@2759|Eukaryota,37MSV@33090|Viridiplantae,3G7RS@35493|Streptophyta,4JMMS@91835|fabids	35493|Streptophyta	E	Acetolactate synthase small subunit 1, chloroplastic-like	-	-	2.2.1.6	ko:K01653	ko00290,ko00650,ko00660,ko00770,ko01100,ko01110,ko01130,ko01210,ko01230,map00290,map00650,map00660,map00770,map01100,map01110,map01130,map01210,map01230	M00019,M00570	R00006,R00014,R00226,R03050,R04672,R04673,R08648	RC00027,RC00106,RC01192,RC02744,RC02893	ko00000,ko00001,ko00002,ko01000	-	-	-	ACT,ACT_5,ALS_ss_C
BPChr06G02132	2.65834	0.000344446	0.0051039	BPChr06G02132	3641.EOX91269	1.2e-62	246.9	COG2124@1|root,KOG0156@2759|Eukaryota,37NY9@33090|Viridiplantae,3G8SI@35493|Streptophyta	35493|Streptophyta	Q	cytochrome P450	-	GO:0003674,GO:0003824,GO:0004497,GO:0005575,GO:0008150,GO:0008152,GO:0009058,GO:0009987,GO:0010035,GO:0010038,GO:0010039,GO:0016020,GO:0016491,GO:0016705,GO:0016709,GO:0019748,GO:0042221,GO:0044550,GO:0050896,GO:0051716,GO:0055114,GO:0070887,GO:0071241,GO:0071248,GO:0071281	1.14.14.1	ko:K07408	ko00140,ko00380,ko00830,ko00980,ko01100,ko04913,ko05204,map00140,map00380,map00830,map00980,map01100,map04913,map05204	-	R02354,R02355,R03089,R03408,R03629,R07000,R07001,R07021,R07022,R07079,R07080,R07081,R07085,R07087,R07098,R07099,R08390,R08392,R09418,R09423,R09442	RC00046,RC00661,RC00704,RC00723,RC00724,RC01444,RC01445,RC01727,RC01732,RC01733,RC02531	ko00000,ko00001,ko00199,ko01000	-	-	-	p450
BPChr05G14863	2.64336	2.09963e-11	1.69958e-09	BPChr05G14863	3649.evm.model.supercontig_62.157	2.5e-32	144.4	KOG0724@1|root,KOG0724@2759|Eukaryota,37VXT@33090|Viridiplantae,3GK58@35493|Streptophyta,3I0U4@3699|Brassicales	35493|Streptophyta	K	DNA-binding transcription factor activity	-	GO:0000003,GO:0003006,GO:0003674,GO:0003682,GO:0003700,GO:0005488,GO:0005515,GO:0005575,GO:0005622,GO:0005623,GO:0005634,GO:0005737,GO:0005829,GO:0006355,GO:0007275,GO:0008150,GO:0009314,GO:0009416,GO:0009605,GO:0009606,GO:0009628,GO:0009629,GO:0009630,GO:0009639,GO:0009790,GO:0009791,GO:0009793,GO:0009889,GO:0009891,GO:0009893,GO:0010114,GO:0010154,GO:0010468,GO:0010556,GO:0010557,GO:0010604,GO:…	-	-	-	-	-	-	-	-	-	-	Myb_DNA-binding
BPChr11G05648	2.63771	9.14055e-08	3.93526e-06	BPChr11G05648	3983.cassava4.1_027825m	5e-22	110.5	2C4UU@1|root,2S6T9@2759|Eukaryota,37WY1@33090|Viridiplantae,3GM6J@35493|Streptophyta,4JR1U@91835|fabids	35493|Streptophyta	S	transcription factor	-	-	-	-	-	-	-	-	-	-	-	-	-
BPChr06G19466	2.60806	2.21062e-14	2.75821e-12	BPChr06G19466	29760.VIT_09s0002g06980.t01	3.8e-117	427.9	28MUC@1|root,2QUCM@2759|Eukaryota,37MYQ@33090|Viridiplantae,3G9NI@35493|Streptophyta	35493|Streptophyta	S	post-illumination chlorophyll fluorescence increase	PIFI	-	-	-	-	-	-	-	-	-	-	-	-
BPChr09G08327	2.58971	1.39005e-20	2.80718e-18	BPChr09G08327	102107.XP_008226705.1	2.2e-122	445.7	COG0785@1|root,2QR2K@2759|Eukaryota,37KXE@33090|Viridiplantae,3GDRS@35493|Streptophyta,4JJGK@91835|fabids	35493|Streptophyta	O	Cytochrome c-type biogenesis ccda-like chloroplastic protein	-	GO:0005575,GO:0005622,GO:0005623,GO:0005737,GO:0008150,GO:0009536,GO:0009579,GO:0009987,GO:0010190,GO:0016020,GO:0016043,GO:0017004,GO:0022607,GO:0031976,GO:0031984,GO:0034357,GO:0034622,GO:0042651,GO:0043226,GO:0043227,GO:0043229,GO:0043231,GO:0043933,GO:0044085,GO:0044422,GO:0044424,GO:0044435,GO:0044436,GO:0044444,GO:0044446,GO:0044464,GO:0055035,GO:0065003,GO:0071840	-	ko:K06196	-	-	-	-	ko00000,ko02000	5.A.1.2	-	-	DsbD
BPChr08G15796	2.54963	3.50075e-13	3.88771e-11	BPChr08G15796	3641.EOY00018	8.8e-138	497.3	28PCE@1|root,2QVZU@2759|Eukaryota,37T2Y@33090|Viridiplantae,3GCQE@35493|Streptophyta	35493|Streptophyta	S	Zinc finger protein	-	GO:0003674,GO:0003700,GO:0006355,GO:0008150,GO:0009889,GO:0010468,GO:0010556,GO:0019219,GO:0019222,GO:0031323,GO:0031326,GO:0050789,GO:0050794,GO:0051171,GO:0051252,GO:0060255,GO:0065007,GO:0080090,GO:0140110,GO:1903506,GO:2000112,GO:2001141	-	-	-	-	-	-	-	-	-	-	CCT
BPChr06G30922	2.47255	0.0048255	0.040738	BPChr06G30922	4432.XP_010255963.1	6.5e-62	243.8	KOG1674@1|root,KOG1674@2759|Eukaryota,37T29@33090|Viridiplantae,3G85D@35493|Streptophyta	35493|Streptophyta	D	cyclin-P3-1-like	-	-	-	-	-	-	-	-	-	-	-	-	Cyclin
BPChr11G07330	2.45086	6.40588e-06	0.00017477	BPChr11G07330	225117.XP_009374503.1	7.7e-50	203.4	28QVS@1|root,2QXIN@2759|Eukaryota,37TQQ@33090|Viridiplantae,3GIEC@35493|Streptophyta,4JTQT@91835|fabids	35493|Streptophyta	S	21 kDa protein-like	-	-	-	-	-	-	-	-	-	-	-	-	PMEI
BPunChr33806	2.428	1.90369e-05	0.000450924	BPunChr33806	3983.cassava4.1_008105m	5.8e-76	291.6	29R0J@1|root,2RX9W@2759|Eukaryota,37TBS@33090|Viridiplantae,3GHN1@35493|Streptophyta,4JT1C@91835|fabids	35493|Streptophyta	S	UPF0481 protein At3g47200-like	-	-	-	-	-	-	-	-	-	-	-	-	DUF247
BPChr02G20694	2.42638	0.00213542	0.0219123	BPChr02G20694	3641.EOY22402	2.5e-141	508.8	28IDJ@1|root,2QQQA@2759|Eukaryota,37TEM@33090|Viridiplantae,3GBSX@35493|Streptophyta	35493|Streptophyta	S	BAHD acyltransferase At5g47980-like	-	-	2.3.1.133	ko:K13065	ko00940,ko00941,ko00945,ko01100,ko01110,map00940,map00941,map00945,map01100,map01110	M00039	R01945,R02416,R07432,R07433	RC00004,RC00055,RC02864	ko00000,ko00001,ko00002,ko01000	-	-	-	Transferase
BPChr09G04037	2.41942	1.50151e-05	0.000368586	BPChr09G04037	29760.VIT_03s0038g03600.t01	9.4e-175	620.2	COG0515@1|root,2RFP5@2759|Eukaryota,37SR6@33090|Viridiplantae,3G868@35493|Streptophyta	35493|Streptophyta	T	Receptor-like cytosolic serine threonine-protein kinase	-	GO:0003674,GO:0003824,GO:0004672,GO:0004674,GO:0004675,GO:0004888,GO:0005575,GO:0005623,GO:0005886,GO:0006464,GO:0006468,GO:0006793,GO:0006796,GO:0006807,GO:0006950,GO:0007154,GO:0007165,GO:0007166,GO:0007167,GO:0007178,GO:0008150,GO:0008152,GO:0009605,GO:0009607,GO:0009611,GO:0009620,GO:0009987,GO:0016020,GO:0016301,GO:0016310,GO:0016740,GO:0016772,GO:0016773,GO:0019199,GO:0019538,GO:0023052,GO:…	-	-	-	-	-	-	-	-	-	-	Pkinase
BPChr05G22418	2.41759	0.000636522	0.00837959	BPChr05G22418	29760.VIT_14s0060g00450.t01	1.1e-254	885.9	COG5072@1|root,KOG2464@2759|Eukaryota,37IAB@33090|Viridiplantae,3G9WZ@35493|Streptophyta	35493|Streptophyta	D	serine threonine-protein kinase	-	GO:0000278,GO:0003674,GO:0003824,GO:0004672,GO:0004674,GO:0005575,GO:0005622,GO:0005623,GO:0005634,GO:0005737,GO:0006325,GO:0006464,GO:0006468,GO:0006793,GO:0006796,GO:0006807,GO:0006996,GO:0007049,GO:0007154,GO:0007165,GO:0008150,GO:0008152,GO:0009987,GO:0016043,GO:0016301,GO:0016310,GO:0016569,GO:0016570,GO:0016572,GO:0016740,GO:0016772,GO:0016773,GO:0018107,GO:0018193,GO:0018210,GO:0019538,GO:…	2.7.11.1	ko:K16315	-	-	-	-	ko00000,ko01000,ko01001,ko03036	-	-	-	Haspin_kinase
BPChr11G14349	2.37732	0.000697809	0.00903392	BPChr11G14349	981085.XP_010102016.1	5.4e-177	627.5	COG1474@1|root,KOG2227@2759|Eukaryota,37JC8@33090|Viridiplantae,3GBN4@35493|Streptophyta,4JMZ7@91835|fabids	35493|Streptophyta	DL	Cell division control protein	CDC6	GO:0006139,GO:0006259,GO:0006260,GO:0006261,GO:0006725,GO:0006807,GO:0007049,GO:0008150,GO:0008152,GO:0009058,GO:0009059,GO:0009987,GO:0022402,GO:0034641,GO:0034645,GO:0042023,GO:0043170,GO:0044237,GO:0044238,GO:0044249,GO:0044260,GO:0044786,GO:0046483,GO:0071704,GO:0090304,GO:1901360,GO:1901576	-	ko:K02213	ko04110,ko04111,ko04113,map04110,map04111,map04113	-	-	-	ko00000,ko00001,ko03032	-	-	-	AAA_22,Cdc6_C
BPChr11G32507	2.37528	3.62348e-06	0.000105469	BPChr11G32507	4641.GSMUA_Achr9P00100_001	1e-25	122.1	KOG0581@1|root,KOG0581@2759|Eukaryota,37IHU@33090|Viridiplantae,3G81G@35493|Streptophyta,3KYJG@4447|Liliopsida	35493|Streptophyta	T	Belongs to the protein kinase superfamily	MKK6	GO:0000003,GO:0000165,GO:0000187,GO:0000280,GO:0000910,GO:0001932,GO:0001934,GO:0003674,GO:0003824,GO:0004672,GO:0004674,GO:0004708,GO:0004712,GO:0005575,GO:0005622,GO:0005623,GO:0005737,GO:0006464,GO:0006468,GO:0006793,GO:0006796,GO:0006807,GO:0006950,GO:0006996,GO:0007049,GO:0007112,GO:0007140,GO:0007154,GO:0007165,GO:0007275,GO:0007276,GO:0007346,GO:0008150,GO:0008152,GO:0009524,GO:0009653,GO:…	2.7.12.2	ko:K04368	ko01521,ko01522,ko04010,ko04012,ko04013,ko04014,ko04015,ko04022,ko04024,ko04062,ko04066,ko04068,ko04071,ko04072,ko04114,ko04140,ko04150,ko04151,ko04210,ko04218,ko04270,ko04320,ko04370,ko04371,ko04380,ko04510,ko04540,ko04550,ko04620,ko04626,ko04650,ko04660,ko04662,ko04664,ko04666,ko04668,ko04720,ko04722,ko04725,ko04726,ko04730,ko04810,ko04910,ko04912,ko04914,ko04915,ko04916,ko04917,ko04919,ko04921…	M00687	-	-	ko00000,ko00001,ko00002,ko01000,ko01001	-	-	-	Pkinase
BPChr11G05698	2.37021	0.00398252	0.03538	BPChr11G05698	29760.VIT_14s0066g02370.t01	6.4e-81	307.8	KOG2577@1|root,KOG2578@2759|Eukaryota,37N2X@33090|Viridiplantae,3GFH7@35493|Streptophyta	35493|Streptophyta	K	E2F transcription factor-like	-	GO:0003674,GO:0003676,GO:0003677,GO:0003700,GO:0005488,GO:0005575,GO:0005622,GO:0005623,GO:0005634,GO:0005737,GO:0006355,GO:0008150,GO:0008284,GO:0009719,GO:0009725,GO:0009733,GO:0009889,GO:0010033,GO:0010468,GO:0010556,GO:0019219,GO:0019222,GO:0031323,GO:0031326,GO:0042127,GO:0042221,GO:0043226,GO:0043227,GO:0043229,GO:0043231,GO:0044424,GO:0044464,GO:0048518,GO:0048522,GO:0050789,GO:0050794,GO:…	-	ko:K09391	-	-	-	-	ko00000,ko03000	-	-	-	E2F_TDP
BPChr14G25348	2.36515	1.1786e-10	8.42612e-09	BPChr14G25348	57918.XP_004304386.1	1.9e-94	353.6	COG1025@1|root,KOG0959@2759|Eukaryota,37NQM@33090|Viridiplantae,3GC2S@35493|Streptophyta,4JG1Z@91835|fabids	35493|Streptophyta	O	Belongs to the peptidase M16 family	-	-	3.4.24.56	ko:K01408	ko05010,map05010	-	-	-	ko00000,ko00001,ko01000,ko01002	-	-	-	Peptidase_M16,Peptidase_M16_C,Peptidase_M16_M
BPChr13G15696	2.36218	0.00454127	0.0388807	BPChr13G15696	3760.EMJ22572	6e-59	233.8	COG0666@1|root,KOG0504@2759|Eukaryota	2759|Eukaryota	I	protein ubiquitination	-	-	-	-	-	-	-	-	-	-	-	-	PGG
BPChr02G20823	2.34164	0.000931029	0.0113632	BPChr02G20823	3641.EOY22402	1.9e-141	509.2	28IDJ@1|root,2QQQA@2759|Eukaryota,37TEM@33090|Viridiplantae,3GBSX@35493|Streptophyta	35493|Streptophyta	S	BAHD acyltransferase At5g47980-like	-	-	2.3.1.133	ko:K13065	ko00940,ko00941,ko00945,ko01100,ko01110,map00940,map00941,map00945,map01100,map01110	M00039	R01945,R02416,R07432,R07433	RC00004,RC00055,RC02864	ko00000,ko00001,ko00002,ko01000	-	-	-	Transferase
BPChr11G14409	2.33237	4.4614e-12	4.15198e-10	BPChr11G14409	3983.cassava4.1_029505m	1.3e-61	242.7	28TW4@1|root,2R0KN@2759|Eukaryota,37TP5@33090|Viridiplantae,3GI3A@35493|Streptophyta,4JNWA@91835|fabids	35493|Streptophyta	S	PAR1 protein	-	-	-	-	-	-	-	-	-	-	-	-	PAR1
BPChr04G27246	2.32888	8.71102e-33	3.34589e-30	BPChr04G27246	71139.XP_010060532.1	3.6e-208	730.7	COG1028@1|root,KOG1208@2759|Eukaryota,37R40@33090|Viridiplantae,3GD2D@35493|Streptophyta	35493|Streptophyta	Q	protochlorophyllide	PORA	GO:0003674,GO:0003824,GO:0005488,GO:0005515,GO:0005575,GO:0005622,GO:0005623,GO:0005737,GO:0007275,GO:0008150,GO:0008152,GO:0009314,GO:0009416,GO:0009507,GO:0009526,GO:0009527,GO:0009534,GO:0009535,GO:0009536,GO:0009579,GO:0009628,GO:0009639,GO:0009640,GO:0009642,GO:0009646,GO:0009647,GO:0009707,GO:0009719,GO:0009723,GO:0009725,GO:0009791,GO:0009941,GO:0010033,GO:0016020,GO:0016491,GO:0016627,GO:…	1.3.1.33	ko:K00218	ko00860,ko01100,ko01110,map00860,map01100,map01110	-	R03845,R06286	RC01008	ko00000,ko00001,ko01000	-	-	-	adh_short
BPChr09G20540	2.32674	4.36602e-12	4.09215e-10	BPChr09G20540	3760.EMJ10276	0.0	1141.3	COG1404@1|root,2QSF0@2759|Eukaryota,37Q0U@33090|Viridiplantae,3GEDZ@35493|Streptophyta,4JIBH@91835|fabids	35493|Streptophyta	O	subtilisin-like protease	-	GO:0005575,GO:0005576	-	-	-	-	-	-	-	-	-	-	Inhibitor_I9,Peptidase_S8
BPChr05G14828	2.31341	8.90067e-13	9.47583e-11	BPChr05G14828	71139.XP_010056019.1	3.3e-39	168.3	KOG0118@1|root,KOG0118@2759|Eukaryota,37U6A@33090|Viridiplantae,3GIC4@35493|Streptophyta	35493|Streptophyta	A	glycine-rich RNA-binding	GRP1	-	-	ko:K12885,ko:K13195	ko03040,map03040	-	-	-	ko00000,ko00001,ko03041	-	-	-	RRM_1
BPChr06G19239	2.27734	1.34728e-23	3.47262e-21	BPChr06G19239	3760.EMJ18345	0.0	1610.9	COG1874@1|root,KOG0496@2759|Eukaryota,37SJF@33090|Viridiplantae,3GB4F@35493|Streptophyta,4JGZ1@91835|fabids	35493|Streptophyta	G	beta-galactosidase	-	GO:0003674,GO:0003824,GO:0004553,GO:0004565,GO:0005575,GO:0005618,GO:0005622,GO:0005623,GO:0005737,GO:0005773,GO:0005911,GO:0009505,GO:0009506,GO:0015925,GO:0016787,GO:0016798,GO:0030054,GO:0030312,GO:0043226,GO:0043227,GO:0043229,GO:0043231,GO:0044424,GO:0044444,GO:0044464,GO:0055044,GO:0071944	-	-	-	-	-	-	-	-	-	-	Gal_Lectin,Glyco_hydro_35
BPChr06G26088	2.22967	2.33692e-06	7.164e-05	BPChr06G26088	3760.EMJ21381	8.8e-218	763.5	KOG4302@1|root,KOG4302@2759|Eukaryota,37Z13@33090|Viridiplantae,3GNUX@35493|Streptophyta,4JSP3@91835|fabids	35493|Streptophyta	DZ	Microtubule associated protein (MAP65/ASE1 family)	-	-	-	ko:K16732	-	-	-	-	ko00000,ko03036,ko04812	-	-	-	MAP65_ASE1
BPChr08G27623	2.21953	2.91596e-08	1.37973e-06	BPChr08G27623	3641.EOY30613	2.6e-189	667.9	KOG0581@1|root,KOG0581@2759|Eukaryota,37IHU@33090|Viridiplantae,3G81G@35493|Streptophyta	35493|Streptophyta	T	belongs to the protein kinase superfamily	MKK6	GO:0000003,GO:0000165,GO:0000187,GO:0000280,GO:0000910,GO:0001932,GO:0001934,GO:0003674,GO:0003824,GO:0004672,GO:0004674,GO:0004708,GO:0004712,GO:0005575,GO:0005622,GO:0005623,GO:0005737,GO:0006464,GO:0006468,GO:0006793,GO:0006796,GO:0006807,GO:0006950,GO:0006996,GO:0007049,GO:0007112,GO:0007140,GO:0007154,GO:0007165,GO:0007275,GO:0007276,GO:0007346,GO:0008150,GO:0008152,GO:0009524,GO:0009653,GO:…	2.7.12.2	ko:K04368	ko01521,ko01522,ko04010,ko04012,ko04013,ko04014,ko04015,ko04022,ko04024,ko04062,ko04066,ko04068,ko04071,ko04072,ko04114,ko04140,ko04150,ko04151,ko04210,ko04218,ko04270,ko04320,ko04370,ko04371,ko04380,ko04510,ko04540,ko04550,ko04620,ko04626,ko04650,ko04660,ko04662,ko04664,ko04666,ko04668,ko04720,ko04722,ko04725,ko04726,ko04730,ko04810,ko04910,ko04912,ko04914,ko04915,ko04916,ko04917,ko04919,ko04921…	M00687	-	-	ko00000,ko00001,ko00002,ko01000,ko01001	-	-	-	Pkinase
BPChr08G20378	2.21062	9.45287e-20	1.73058e-17	BPChr08G20378	3760.EMJ28238	0.0	2276.9	COG0574@1|root,2QQ6R@2759|Eukaryota,37KSG@33090|Viridiplantae,3GDUC@35493|Streptophyta,4JEYT@91835|fabids	35493|Streptophyta	G	Alpha-glucan water dikinase	-	GO:0000272,GO:0003674,GO:0003824,GO:0005575,GO:0005622,GO:0005623,GO:0005737,GO:0005739,GO:0005975,GO:0005976,GO:0005982,GO:0005983,GO:0006073,GO:0006793,GO:0006796,GO:0006950,GO:0008150,GO:0008152,GO:0009056,GO:0009057,GO:0009251,GO:0009266,GO:0009409,GO:0009507,GO:0009526,GO:0009532,GO:0009536,GO:0009570,GO:0009605,GO:0009607,GO:0009608,GO:0009610,GO:0009620,GO:0009628,GO:0009631,GO:0009941,GO:…	2.7.9.4	ko:K08244	-	-	-	-	ko00000,ko01000	-	-	-	PPDK_N
BPChr01G22828	2.19914	0.00245886	0.0245497	BPChr01G22828	4432.XP_010271468.1	7.9e-273	946.8	COG5059@1|root,KOG0242@2759|Eukaryota,37KAA@33090|Viridiplantae,3G9Y6@35493|Streptophyta	35493|Streptophyta	Z	Belongs to the TRAFAC class myosin-kinesin ATPase superfamily. Kinesin family	-	GO:0000166,GO:0003674,GO:0003774,GO:0003777,GO:0003824,GO:0005488,GO:0005524,GO:0005575,GO:0005622,GO:0005623,GO:0005856,GO:0005871,GO:0005874,GO:0005875,GO:0005886,GO:0005911,GO:0006928,GO:0007017,GO:0007018,GO:0008144,GO:0008150,GO:0009506,GO:0009987,GO:0015630,GO:0016020,GO:0016462,GO:0016787,GO:0016817,GO:0016818,GO:0016887,GO:0017076,GO:0017111,GO:0030054,GO:0030554,GO:0032553,GO:0032555,GO:…	-	ko:K11498	-	-	-	-	ko00000,ko01009,ko03036	-	-	-	DUF3490,Kinesin
BPChr04G18049	2.18496	0.00582772	0.0466337	BPChr04G18049	981085.XP_010092744.1	4e-207	727.6	COG2124@1|root,KOG0157@2759|Eukaryota,37IXF@33090|Viridiplantae,3G9DS@35493|Streptophyta,4JRG3@91835|fabids	35493|Streptophyta	Q	Belongs to the cytochrome P450 family	-	GO:0003674,GO:0003824,GO:0004497,GO:0006082,GO:0006629,GO:0006720,GO:0006721,GO:0006722,GO:0008150,GO:0008152,GO:0008202,GO:0008299,GO:0008300,GO:0008395,GO:0008610,GO:0009056,GO:0009058,GO:0009719,GO:0009725,GO:0009741,GO:0009987,GO:0010033,GO:0010268,GO:0010817,GO:0014070,GO:0016042,GO:0016053,GO:0016104,GO:0016105,GO:0016114,GO:0016115,GO:0016128,GO:0016131,GO:0016491,GO:0016705,GO:0016709,GO:…	1.14.13.173,1.14.14.1	ko:K07426,ko:K07428,ko:K10717,ko:K17873,ko:K20660	ko00908,ko01100,ko01110,ko04726,map00908,map01100,map01110,map04726	-	R08053,R08054,R08055	RC01137	ko00000,ko00001,ko00199,ko01000	-	-	-	p450
BPChr05G20988	2.1833	2.62675e-05	0.000596331	BPChr05G20988	2711.XP_006492319.1	0.0	1300.8	COG1472@1|root,2QQ55@2759|Eukaryota,37HXP@33090|Viridiplantae,3G7F4@35493|Streptophyta	35493|Streptophyta	G	beta-D-xylosidase	-	GO:0005575,GO:0005618,GO:0005623,GO:0009505,GO:0030312,GO:0044464,GO:0071944	-	-	-	-	-	-	-	-	-	-	Fn3-like,Glyco_hydro_3,Glyco_hydro_3_C
BPChr09G20505	2.1823	6.42518e-13	6.87775e-11	BPChr09G20505	3750.XP_008374126.1	8.5e-247	859.4	2CM77@1|root,2QPI6@2759|Eukaryota,37P55@33090|Viridiplantae,3G86B@35493|Streptophyta,4JFN9@91835|fabids	35493|Streptophyta	G	Endoglucanase	-	-	3.2.1.4	ko:K01179	ko00500,ko01100,map00500,map01100	-	R06200,R11307,R11308	-	ko00000,ko00001,ko01000	-	GH5,GH9	-	Glyco_hydro_9
BPChr07G12382	2.17991	0.00626137	0.0494738	BPChr07G12382	3847.GLYMA16G06270.5	2.8e-83	315.1	COG5093@1|root,KOG4071@2759|Eukaryota,37M8S@33090|Viridiplantae,3G7T3@35493|Streptophyta,4JFG5@91835|fabids	35493|Streptophyta	L	DNA replication complex GINS protein	-	GO:0000228,GO:0000278,GO:0000724,GO:0000725,GO:0000727,GO:0000811,GO:0005575,GO:0005622,GO:0005623,GO:0005634,GO:0005654,GO:0005657,GO:0005694,GO:0006139,GO:0006259,GO:0006260,GO:0006261,GO:0006270,GO:0006281,GO:0006302,GO:0006310,GO:0006725,GO:0006807,GO:0006950,GO:0006974,GO:0007049,GO:0008150,GO:0008152,GO:0009058,GO:0009059,GO:0009987,GO:0022402,GO:0031261,GO:0031298,GO:0031974,GO:0031981,GO:…	-	ko:K10733	-	M00286	-	-	ko00000,ko00002,ko03032	-	-	-	Sld5
BPChr13G00427	2.14651	0.00110653	0.0130655	BPChr13G00427	3760.EMJ18525	0.0	1371.3	KOG1829@1|root,KOG1829@2759|Eukaryota,37IZ2@33090|Viridiplantae,3GEQS@35493|Streptophyta,4JND0@91835|fabids	35493|Streptophyta	T	isoform X1	-	-	-	-	-	-	-	-	-	-	-	-	-
BPChr01G24983	2.13502	1.67279e-05	0.000404048	BPChr01G24983	3983.cassava4.1_026709m	0.0	1219.5	COG1502@1|root,KOG1329@2759|Eukaryota,37J5H@33090|Viridiplantae,3GCN5@35493|Streptophyta,4JJNB@91835|fabids	35493|Streptophyta	I	Hydrolyzes glycerol-phospholipids at the terminal phosphodiesteric bond	-	GO:0001101,GO:0003674,GO:0003824,GO:0004620,GO:0004630,GO:0006629,GO:0006643,GO:0006950,GO:0006970,GO:0007275,GO:0008081,GO:0008150,GO:0008152,GO:0008610,GO:0009056,GO:0009058,GO:0009414,GO:0009415,GO:0009628,GO:0009651,GO:0009719,GO:0009725,GO:0009737,GO:0009987,GO:0010033,GO:0010035,GO:0016042,GO:0016298,GO:0016787,GO:0016788,GO:0022622,GO:0032501,GO:0032502,GO:0033993,GO:0042221,GO:0042578,GO:…	3.1.4.4	ko:K01115	ko00564,ko00565,ko01100,ko01110,ko04014,ko04024,ko04071,ko04072,ko04144,ko04666,ko04724,ko04912,ko05231,map00564,map00565,map01100,map01110,map04014,map04024,map04071,map04072,map04144,map04666,map04724,map04912,map05231	-	R01310,R02051,R07385	RC00017,RC00425	ko00000,ko00001,ko01000,ko04131	-	-	-	C2,PLD_C,PLDc
BPChr13G02571	2.13307	0.000124869	0.00217815	BPChr13G02571	71139.XP_010041084.1	4.6e-111	407.5	COG0543@1|root,KOG0534@2759|Eukaryota,37Z21@33090|Viridiplantae,3GNXW@35493|Streptophyta	35493|Streptophyta	CH	Oxidoreductase FAD-binding domain	-	-	1.6.2.2	ko:K00326	ko00520,map00520	-	R00100	-	ko00000,ko00001,ko01000	-	-	-	FAD_binding_6,NAD_binding_1
BPChr14G05470	2.10338	6.924e-33	2.71268e-30	BPChr14G05470	3659.XP_004169749.1	8.9e-141	506.9	COG0750@1|root,2QUAP@2759|Eukaryota,37JF0@33090|Viridiplantae,3GEIE@35493|Streptophyta,4JGQ5@91835|fabids	35493|Streptophyta	M	zinc metalloprotease EGY1, chloroplastic	EGY1	GO:0003674,GO:0003824,GO:0004175,GO:0004222,GO:0005575,GO:0005622,GO:0005623,GO:0005737,GO:0006091,GO:0006508,GO:0006807,GO:0006950,GO:0006970,GO:0006996,GO:0008150,GO:0008152,GO:0008233,GO:0008237,GO:0009314,GO:0009416,GO:0009507,GO:0009536,GO:0009605,GO:0009606,GO:0009628,GO:0009629,GO:0009630,GO:0009651,GO:0009657,GO:0009658,GO:0009668,GO:0009719,GO:0009723,GO:0009725,GO:0009959,GO:0009987,GO:…	-	-	-	-	-	-	-	-	-	-	Peptidase_M50
BPChr01G16814	2.09948	8.02399e-05	0.00152604	BPChr01G16814	3983.cassava4.1_013438m	1.3e-136	492.7	COG0580@1|root,KOG0223@2759|Eukaryota,37I73@33090|Viridiplantae,3G7V9@35493|Streptophyta,4JEC1@91835|fabids	35493|Streptophyta	G	Belongs to the MIP aquaporin (TC 1.A.8) family	-	GO:0003674,GO:0005215,GO:0005372,GO:0005575,GO:0005623,GO:0005886,GO:0005887,GO:0006810,GO:0006811,GO:0006833,GO:0008150,GO:0015250,GO:0015267,GO:0015318,GO:0016020,GO:0016021,GO:0022803,GO:0022838,GO:0022857,GO:0031224,GO:0031226,GO:0034220,GO:0042044,GO:0044425,GO:0044459,GO:0044464,GO:0051179,GO:0051234,GO:0055085,GO:0071944	-	ko:K09872	-	-	-	-	ko00000,ko02000	1.A.8,1.A.8.11	-	-	MIP
BPChr14G05533	2.0972	1.76287e-25	5.07836e-23	BPChr14G05533	4432.XP_010266698.1	3.3e-50	204.9	COG0750@1|root,2QUAP@2759|Eukaryota,37JF0@33090|Viridiplantae,3GEIE@35493|Streptophyta	35493|Streptophyta	M	zinc metalloprotease EGY1, chloroplastic	EGY1	GO:0003674,GO:0003824,GO:0004175,GO:0004222,GO:0005575,GO:0005622,GO:0005623,GO:0005737,GO:0006091,GO:0006508,GO:0006807,GO:0006950,GO:0006970,GO:0006996,GO:0008150,GO:0008152,GO:0008233,GO:0008237,GO:0009314,GO:0009416,GO:0009507,GO:0009536,GO:0009605,GO:0009606,GO:0009628,GO:0009629,GO:0009630,GO:0009651,GO:0009657,GO:0009658,GO:0009668,GO:0009719,GO:0009723,GO:0009725,GO:0009959,GO:0009987,GO:…	-	-	-	-	-	-	-	-	-	-	Peptidase_M50
BPChr06G09512	2.07982	7.06394e-06	0.000189815	BPChr06G09512	102107.XP_008226744.1	7.3e-296	1023.1	COG0515@1|root,2QSMT@2759|Eukaryota,37M64@33090|Viridiplantae,3GEBW@35493|Streptophyta,4JMRI@91835|fabids	35493|Streptophyta	T	Serine threonine-protein kinase	-	GO:0003674,GO:0003824,GO:0004672,GO:0004674,GO:0004675,GO:0004888,GO:0005488,GO:0005515,GO:0005575,GO:0005622,GO:0005623,GO:0005737,GO:0005773,GO:0005886,GO:0005911,GO:0006464,GO:0006468,GO:0006793,GO:0006796,GO:0006807,GO:0007154,GO:0007165,GO:0007166,GO:0007167,GO:0007178,GO:0008150,GO:0008152,GO:0009506,GO:0009987,GO:0016020,GO:0016301,GO:0016310,GO:0016740,GO:0016772,GO:0016773,GO:0019199,GO:…	-	-	-	-	-	-	-	-	-	-	B_lectin,DUF3403,PAN_2,Pkinase_Tyr,S_locus_glycop
BPChr06G31171	2.06829	0.00143656	0.0160805	BPChr06G31171	3750.XP_008354170.1	4.5e-140	504.2	2C0PQ@1|root,2QT8W@2759|Eukaryota,37HUF@33090|Viridiplantae,3GAU8@35493|Streptophyta,4JIS3@91835|fabids	35493|Streptophyta	Q	Belongs to the peroxidase family. Classical plant (class III) peroxidase subfamily	-	-	1.11.1.7	ko:K00430	ko00940,ko01100,ko01110,map00940,map01100,map01110	-	R00602,R02596,R03919,R04007,R07443	RC00034	ko00000,ko00001,ko01000	-	-	-	peroxidase
BPChr12G26810	2.06049	0.0017163	0.0185519	BPChr12G26810	3760.EMJ23018	9e-218	763.1	COG1982@1|root,2QWPE@2759|Eukaryota,37J9R@33090|Viridiplantae,3GFJ3@35493|Streptophyta,4JF50@91835|fabids	35493|Streptophyta	E	Arginine	-	-	-	-	-	-	-	-	-	-	-	-	OKR_DC_1,OKR_DC_1_C
BPChr05G31633	2.0594	0.000697941	0.00903392	BPChr05G31633	29760.VIT_18s0001g10830.t01	1.1e-156	559.7	COG3621@1|root,KOG0513@2759|Eukaryota,37MPP@33090|Viridiplantae,3G8BE@35493|Streptophyta	35493|Streptophyta	I	lipolytic acyl hydrolase (LAH)	-	-	-	-	-	-	-	-	-	-	-	-	Patatin
BPChr10G03504	2.04983	9.19604e-05	0.00170266	BPChr10G03504	981085.XP_010105676.1	2.6e-188	665.2	COG0515@1|root,KOG1187@2759|Eukaryota,37HZC@33090|Viridiplantae,3G8QV@35493|Streptophyta,4JIBS@91835|fabids	35493|Streptophyta	T	Receptor-like cytosolic serine threonine-protein kinase	-	GO:0003674,GO:0003824,GO:0004672,GO:0004674,GO:0004675,GO:0004888,GO:0005488,GO:0005515,GO:0005575,GO:0005622,GO:0005623,GO:0005634,GO:0005737,GO:0005886,GO:0006464,GO:0006468,GO:0006793,GO:0006796,GO:0006807,GO:0007154,GO:0007165,GO:0007166,GO:0007167,GO:0007178,GO:0008150,GO:0008152,GO:0009987,GO:0016020,GO:0016301,GO:0016310,GO:0016740,GO:0016772,GO:0016773,GO:0019199,GO:0019538,GO:0019899,GO:…	-	-	-	-	-	-	-	-	-	-	Pkinase,Pkinase_Tyr
BPChr09G12131	2.04935	0.000118311	0.00209358	BPChr09G12131	102107.XP_008224362.1	4.5e-254	883.6	KOG0252@1|root,KOG0252@2759|Eukaryota,37I5U@33090|Viridiplantae,3GERK@35493|Streptophyta,4JKYY@91835|fabids	35493|Streptophyta	P	Inorganic phosphate transporter	-	GO:0003674,GO:0005215,GO:0005315,GO:0005575,GO:0005623,GO:0005886,GO:0005887,GO:0006810,GO:0006811,GO:0006817,GO:0006820,GO:0006950,GO:0007154,GO:0008150,GO:0008509,GO:0009267,GO:0009605,GO:0009987,GO:0009991,GO:0015075,GO:0015103,GO:0015114,GO:0015291,GO:0015318,GO:0015698,GO:0016020,GO:0016021,GO:0016036,GO:0022804,GO:0022857,GO:0031224,GO:0031226,GO:0031667,GO:0031668,GO:0031669,GO:0033554,GO:…	-	ko:K08176	-	-	-	-	ko00000,ko02000	2.A.1.9	-	-	Sugar_tr
BPChr03G02614	2.03129	3.85425e-12	3.62985e-10	BPChr03G02614	3641.EOY16692	5.9e-80	303.9	COG1814@1|root,KOG4473@2759|Eukaryota,37KA2@33090|Viridiplantae,3GH10@35493|Streptophyta	35493|Streptophyta	S	Vacuolar iron transporter homolog	-	GO:0000041,GO:0003674,GO:0005215,GO:0005381,GO:0005384,GO:0005575,GO:0006810,GO:0006811,GO:0006812,GO:0006826,GO:0006828,GO:0006873,GO:0006875,GO:0006879,GO:0006880,GO:0008150,GO:0008324,GO:0009987,GO:0010035,GO:0010038,GO:0010039,GO:0015075,GO:0015318,GO:0016020,GO:0019725,GO:0022857,GO:0022890,GO:0030001,GO:0030003,GO:0030026,GO:0034220,GO:0034755,GO:0042221,GO:0042592,GO:0046873,GO:0046915,GO:…	-	-	-	-	-	-	-	-	-	-	VIT1
BPChr13G04468	2.03129	0.00113163	0.0133299	BPChr13G04468	29760.VIT_19s0027g00750.t01	3.5e-50	205.7	KOG3186@1|root,KOG3186@2759|Eukaryota,37R90@33090|Viridiplantae,3G79H@35493|Streptophyta	35493|Streptophyta	D	DNA polymerase zeta processivity	-	GO:0006950,GO:0006974,GO:0008150,GO:0009314,GO:0009411,GO:0009416,GO:0009628,GO:0009987,GO:0010224,GO:0033554,GO:0050896,GO:0051716	-	ko:K02537,ko:K13728	ko04110,ko04111,ko04113,ko04114,ko04914,ko05100,ko05131,ko05166,map04110,map04111,map04113,map04114,map04914,map05100,map05131,map05166	M00293	-	-	ko00000,ko00001,ko00002,ko03036	-	-	-	HORMA
BPChr14G01914	2.00886	0.00398382	0.03538	BPChr14G01914	102107.XP_008243106.1	8.6e-56	223.8	KOG3160@1|root,KOG3160@2759|Eukaryota,37Y7U@33090|Viridiplantae,3GNZ0@35493|Streptophyta,4JVSU@91835|fabids	35493|Streptophyta	O	Gamma interferon inducible lysosomal thiol reductase (GILT)	-	-	-	ko:K08059	ko04612,map04612	-	-	-	ko00000,ko00001	-	-	-	GILT
BPChr14G27708	2.00074	2.74682e-39	1.73572e-36	BPChr14G27708	2711.XP_006481768.1	2e-110	405.6	2CMD4@1|root,2QQ0B@2759|Eukaryota,37I99@33090|Viridiplantae,3G9W9@35493|Streptophyta	35493|Streptophyta	S	Heme-binding-like protein At3g10130	-	-	-	-	-	-	-	-	-	-	-	-	SOUL
BPChr08G05432	1.99929	0.000470862	0.00656492	BPChr08G05432	29760.VIT_00s0226g00070.t01	4.8e-188	664.1	28K9J@1|root,2QQN4@2759|Eukaryota,37J7P@33090|Viridiplantae,3GASA@35493|Streptophyta	35493|Streptophyta	K	Belongs to the GRAS family	-	-	-	-	-	-	-	-	-	-	-	-	GRAS
BPChr01G20295	1.99247	0.00469925	0.0398846	BPChr01G20295	90675.XP_010419446.1	1.2e-19	105.1	2E97R@1|root,2SFKZ@2759|Eukaryota,388XY@33090|Viridiplantae,3GXQW@35493|Streptophyta,3HWUS@3699|Brassicales	35493|Streptophyta	S	BEST Arabidopsis thaliana protein match is Cysteine Histidine-rich C1 domain family protein (TAIR	-	-	-	-	-	-	-	-	-	-	-	-	C1_2
BPChr03G00739	1.98846	0.00258727	0.0254812	BPChr03G00739	29760.VIT_00s0340g00090.t01	3.4e-96	357.8	28KBI@1|root,2QV43@2759|Eukaryota,37QBP@33090|Viridiplantae,3G7MI@35493|Streptophyta	35493|Streptophyta	S	lob domain-containing protein	LBD6	-	-	-	-	-	-	-	-	-	-	-	LOB
BPChr10G21775	1.98563	5.77033e-06	0.000160205	BPChr10G21775	3641.EOY34527	0.0	1117.8	COG3158@1|root,2QPSA@2759|Eukaryota,37Q41@33090|Viridiplantae,3G8XC@35493|Streptophyta	35493|Streptophyta	P	Potassium transporter	-	GO:0003674,GO:0005215,GO:0005575,GO:0005623,GO:0005886,GO:0006810,GO:0006811,GO:0006812,GO:0006813,GO:0008150,GO:0008324,GO:0009987,GO:0015075,GO:0015077,GO:0015079,GO:0015318,GO:0015672,GO:0016020,GO:0022857,GO:0022890,GO:0030001,GO:0034220,GO:0044464,GO:0046873,GO:0051179,GO:0051234,GO:0055085,GO:0071804,GO:0071805,GO:0071944,GO:0098655,GO:0098660,GO:0098662	-	ko:K03549	-	-	-	-	ko00000,ko02000	2.A.72	-	-	K_trans
BPChr06G13525	1.97046	3.1014e-11	2.40132e-09	BPChr06G13525	225117.XP_009362647.1	1e-200	706.1	COG0561@1|root,2QTVT@2759|Eukaryota,37JY7@33090|Viridiplantae,3G9FH@35493|Streptophyta,4JHGQ@91835|fabids	35493|Streptophyta	S	sucrose-phosphatase	SPP2	GO:0003674,GO:0003824,GO:0016740,GO:0016757	3.1.3.24	ko:K07024	ko00500,map00500	-	R00805,R06211	RC00017	ko00000,ko00001,ko01000	-	-	-	S6PP,S6PP_C
BPChr14G04160	1.96402	0.000226375	0.00360818	BPChr14G04160	2711.XP_006481400.1	0.0	1424.1	KOG1408@1|root,KOG1408@2759|Eukaryota,37HGA@33090|Viridiplantae,3GAZE@35493|Streptophyta	35493|Streptophyta	S	Mitogen-activated protein kinase-binding protein	-	GO:0000922,GO:0001817,GO:0001818,GO:0002791,GO:0002792,GO:0002831,GO:0002832,GO:0003674,GO:0003676,GO:0003723,GO:0005488,GO:0005575,GO:0005622,GO:0005623,GO:0005634,GO:0005681,GO:0005682,GO:0005737,GO:0005819,GO:0005856,GO:0006139,GO:0006396,GO:0006725,GO:0006807,GO:0008150,GO:0008152,GO:0008380,GO:0009966,GO:0009968,GO:0009987,GO:0010467,GO:0010646,GO:0010648,GO:0015630,GO:0016070,GO:0023051,GO:…	-	ko:K21763	-	-	-	-	ko00000,ko03036	-	-	-	WD40
BPChr14G12825	1.9592	3.70124e-09	2.05392e-07	BPChr14G12825	3983.cassava4.1_016798m	3.6e-75	288.1	COG0526@1|root,KOG0907@2759|Eukaryota,37TYB@33090|Viridiplantae,3GIET@35493|Streptophyta,4JNUF@91835|fabids	35493|Streptophyta	O	Thioredoxin-like 3-1	-	GO:0003674,GO:0003824,GO:0004791,GO:0006950,GO:0006979,GO:0008150,GO:0008152,GO:0009636,GO:0009987,GO:0015035,GO:0015036,GO:0016209,GO:0016491,GO:0016651,GO:0016667,GO:0016668,GO:0016671,GO:0019725,GO:0033554,GO:0034599,GO:0042221,GO:0042592,GO:0045454,GO:0047134,GO:0050789,GO:0050794,GO:0050896,GO:0051716,GO:0055114,GO:0065007,GO:0065008,GO:0070887,GO:0097237,GO:0098754,GO:0098869,GO:1990748	-	ko:K03671	ko04621,ko05418,map04621,map05418	-	-	-	ko00000,ko00001,ko03110	-	-	-	Thioredoxin
BPChr10G03307	1.95342	0.00548059	0.044529	BPChr10G03307	8479.XP_005311290.1	2.6e-12	79.0	COG2036@1|root,KOG3467@2759|Eukaryota	2759|Eukaryota	B	protein heterodimerization activity	-	-	-	ko:K11254	ko05034,ko05203,ko05322,map05034,map05203,map05322	-	-	-	ko00000,ko00001,ko03036	-	-	-	CENP-T_C,TAF
BPChr12G11537	1.94896	0.00181551	0.0193704	BPChr12G11537	29730.Gorai.002G131800.1	4.7e-17	94.7	2E8YR@1|root,2SFD6@2759|Eukaryota,37XCN@33090|Viridiplantae,3GMR4@35493|Streptophyta	35493|Streptophyta	S	calcium-binding protein	-	-	-	-	-	-	-	-	-	-	-	-	EF-hand_1,EF-hand_5,EF-hand_7
BPChr03G02420	1.94675	0.000318082	0.00478197	BPChr03G02420	3641.EOY31029	1.4e-189	669.5	COG0513@1|root,KOG0335@2759|Eukaryota,37TMC@33090|Viridiplantae,3GHG4@35493|Streptophyta	35493|Streptophyta	A	DEAD-box ATP-dependent RNA helicase	-	GO:0003674,GO:0003724,GO:0003824,GO:0004004,GO:0004386,GO:0005575,GO:0005622,GO:0005623,GO:0005634,GO:0005730,GO:0005737,GO:0006139,GO:0006725,GO:0006807,GO:0008026,GO:0008150,GO:0008152,GO:0008186,GO:0009987,GO:0010501,GO:0016070,GO:0016462,GO:0016787,GO:0016817,GO:0016818,GO:0016887,GO:0017111,GO:0031974,GO:0031981,GO:0034641,GO:0042623,GO:0043170,GO:0043226,GO:0043227,GO:0043228,GO:0043229,GO:…	3.6.4.13	ko:K11594	ko04622,ko05161,ko05203,map04622,map05161,map05203	-	-	-	ko00000,ko00001,ko01000,ko03019,ko03036,ko03041	-	-	-	DEAD,Helicase_C
BPunChr33603	1.93688	4.50824e-09	2.46681e-07	BPunChr33603	3641.EOY24131	1.8e-261	908.3	2CJU3@1|root,2QTBX@2759|Eukaryota,37IM6@33090|Viridiplantae,3GDU5@35493|Streptophyta	35493|Streptophyta	G	beta-amylase	-	GO:0000272,GO:0001101,GO:0003674,GO:0003824,GO:0004553,GO:0005575,GO:0005622,GO:0005623,GO:0005634,GO:0005737,GO:0005829,GO:0005975,GO:0005976,GO:0005982,GO:0005983,GO:0006073,GO:0006950,GO:0008150,GO:0008152,GO:0009056,GO:0009057,GO:0009251,GO:0009414,GO:0009415,GO:0009628,GO:0009987,GO:0010035,GO:0016052,GO:0016160,GO:0016161,GO:0016787,GO:0016798,GO:0042221,GO:0043170,GO:0043226,GO:0043227,GO:…	3.2.1.2	ko:K01177	ko00500,map00500	-	R02112,R11262	-	ko00000,ko00001,ko01000	-	GH14	-	Glyco_hydro_14
BPChr09G12010	1.92441	7.5889e-05	0.00146584	BPChr09G12010	3988.XP_002518791.1	9.7e-127	459.9	COG0657@1|root,KOG1515@2759|Eukaryota,37MUA@33090|Viridiplantae,3G99W@35493|Streptophyta,4JT3J@91835|fabids	35493|Streptophyta	V	Encoded by	-	GO:0003674,GO:0003824,GO:0005575,GO:0005622,GO:0005623,GO:0005737,GO:0005829,GO:0008150,GO:0008152,GO:0009056,GO:0016787,GO:0016788,GO:0044424,GO:0044444,GO:0044464,GO:0052689	-	-	-	-	-	-	-	-	-	-	Abhydrolase_3
BPunChr32813	1.92152	2.39302e-06	7.31309e-05	BPunChr32813	3641.EOX96288	8.4e-116	423.3	KOG4832@1|root,KOG4832@2759|Eukaryota,37TB6@33090|Viridiplantae,3GEZR@35493|Streptophyta	35493|Streptophyta	ADK	Spindle and kinetochore-associated protein 1 homolog	-	-	-	-	-	-	-	-	-	-	-	-	SKA1
BPChr05G31734	1.91519	0.00429611	0.0373862	BPChr05G31734	29760.VIT_14s0030g01800.t01	1.1e-180	640.2	KOG1171@1|root,KOG1171@2759|Eukaryota,37S6I@33090|Viridiplantae,3GF4F@35493|Streptophyta	35493|Streptophyta	P	tesmin TSO1-like CXC	-	GO:0003674,GO:0003700,GO:0006355,GO:0008150,GO:0009889,GO:0010468,GO:0010556,GO:0019219,GO:0019222,GO:0031323,GO:0031326,GO:0050789,GO:0050794,GO:0051171,GO:0051252,GO:0060255,GO:0065007,GO:0080090,GO:0140110,GO:1903506,GO:2000112,GO:2001141	-	ko:K21776	ko04218,map04218	-	-	-	ko00000,ko00001	-	-	-	TCR
BPChr14G27019	1.91424	5.1331e-05	0.00107313	BPChr14G27019	3760.EMJ14903	0.0	1094.3	COG0515@1|root,2QUIV@2759|Eukaryota,37RIC@33090|Viridiplantae,3G9B7@35493|Streptophyta,4JS1D@91835|fabids	35493|Streptophyta	T	receptor-like serine threonine-protein kinase	-	GO:0002376,GO:0002682,GO:0003674,GO:0003824,GO:0004672,GO:0004674,GO:0005575,GO:0005623,GO:0005886,GO:0005911,GO:0006464,GO:0006468,GO:0006793,GO:0006796,GO:0006807,GO:0006950,GO:0006952,GO:0006955,GO:0008150,GO:0008152,GO:0009506,GO:0009605,GO:0009607,GO:0009611,GO:0009814,GO:0009861,GO:0009987,GO:0016020,GO:0016301,GO:0016310,GO:0016740,GO:0016772,GO:0016773,GO:0019538,GO:0030054,GO:0031347,GO:…	-	-	-	-	-	-	-	-	-	-	LRR_1,LRR_8,Malectin,Pkinase,Pkinase_Tyr
BPChr14G12664	1.90906	0.00233125	0.0235396	BPChr14G12664	102107.XP_008241730.1	4.1e-88	331.6	295ZV@1|root,2RCYF@2759|Eukaryota,37MIM@33090|Viridiplantae,3GGQ5@35493|Streptophyta,4JSEA@91835|fabids	35493|Streptophyta	S	membrane-associated kinase regulator	-	-	-	-	-	-	-	-	-	-	-	-	-
BPChr08G13298	1.90526	0.000132474	0.00228839	BPChr08G13298	102107.XP_008224362.1	4.5e-254	883.6	KOG0252@1|root,KOG0252@2759|Eukaryota,37I5U@33090|Viridiplantae,3GERK@35493|Streptophyta,4JKYY@91835|fabids	35493|Streptophyta	P	Inorganic phosphate transporter	-	GO:0003674,GO:0005215,GO:0005315,GO:0005575,GO:0005623,GO:0005886,GO:0005887,GO:0006810,GO:0006811,GO:0006817,GO:0006820,GO:0006950,GO:0007154,GO:0008150,GO:0008509,GO:0009267,GO:0009605,GO:0009987,GO:0009991,GO:0015075,GO:0015103,GO:0015114,GO:0015291,GO:0015318,GO:0015698,GO:0016020,GO:0016021,GO:0016036,GO:0022804,GO:0022857,GO:0031224,GO:0031226,GO:0031667,GO:0031668,GO:0031669,GO:0033554,GO:…	-	ko:K08176	-	-	-	-	ko00000,ko02000	2.A.1.9	-	-	Sugar_tr
BPChr09G16329	1.89675	2.10573e-09	1.21321e-07	BPChr09G16329	29760.VIT_03s0038g02280.t01	1.7e-172	612.5	2CMC4@1|root,2QPY0@2759|Eukaryota,37IKN@33090|Viridiplantae,3GA8N@35493|Streptophyta	35493|Streptophyta	S	response to cold	-	-	-	ko:K19366	ko04144,map04144	-	-	-	ko00000,ko00001	-	-	-	Senescence
BPChr11G17665	1.8919	0.00068351	0.00889062	BPChr11G17665	3649.evm.model.supercontig_2.334	8.5e-161	573.5	28N77@1|root,2RBEP@2759|Eukaryota,37QFN@33090|Viridiplantae,3GHJN@35493|Streptophyta,3HZDB@3699|Brassicales	35493|Streptophyta	S	3'-N-debenzoyl-2'-deoxytaxol N-benzoyltransferase-like	-	GO:0003674,GO:0003824,GO:0016410,GO:0016740,GO:0016746,GO:0016747,GO:0080072,GO:0080089	2.3.1.248,2.3.1.249	ko:K20239,ko:K20240	-	-	-	-	ko00000,ko01000	-	-	-	Transferase
BPChr07G14128	1.88283	0.000300792	0.00457825	BPChr07G14128	3760.EMJ26894	3.1e-185	654.8	COG2940@1|root,KOG1081@2759|Eukaryota,37QPX@33090|Viridiplantae,3GA3G@35493|Streptophyta,4JM1K@91835|fabids	35493|Streptophyta	K	Encoded by	-	GO:0000785,GO:0005575,GO:0005622,GO:0005623,GO:0005634,GO:0005694,GO:0043226,GO:0043227,GO:0043228,GO:0043229,GO:0043231,GO:0043232,GO:0044422,GO:0044424,GO:0044427,GO:0044446,GO:0044464	2.1.1.43	ko:K11423	ko00310,map00310	-	R03875,R03938,R04866,R04867	RC00003,RC00060,RC00181,RC00496	ko00000,ko00001,ko01000,ko03036	-	-	-	SET
BPChr14G04214	1.88171	0.000434209	0.00614775	BPChr14G04214	2711.XP_006470794.1	6.6e-120	436.8	28K4N@1|root,2QSJ8@2759|Eukaryota,37SDJ@33090|Viridiplantae,3GDKF@35493|Streptophyta	35493|Streptophyta	S	PCTP-like protein	-	-	-	-	-	-	-	-	-	-	-	-	START
BPChr14G05457	1.88091	3.08511e-15	4.13933e-13	BPChr14G05457	4530.OS03T0792400-01	1.1e-38	166.0	COG0750@1|root,2QUAP@2759|Eukaryota,37JF0@33090|Viridiplantae,3GEIE@35493|Streptophyta,3KPY1@4447|Liliopsida,3I3SX@38820|Poales	35493|Streptophyta	M	zinc metalloprotease EGY1, chloroplastic	EGY1	GO:0003674,GO:0003824,GO:0004175,GO:0004222,GO:0005575,GO:0005622,GO:0005623,GO:0005737,GO:0006091,GO:0006508,GO:0006807,GO:0006950,GO:0006970,GO:0006996,GO:0008150,GO:0008152,GO:0008233,GO:0008237,GO:0009314,GO:0009416,GO:0009507,GO:0009536,GO:0009605,GO:0009606,GO:0009628,GO:0009629,GO:0009630,GO:0009651,GO:0009657,GO:0009658,GO:0009668,GO:0009719,GO:0009723,GO:0009725,GO:0009959,GO:0009987,GO:…	-	-	-	-	-	-	-	-	-	-	Peptidase_M50
BPChr11G11788	1.8602	0.00477747	0.0404608	BPChr11G11788	102107.XP_008231201.1	5.6e-270	936.8	COG0515@1|root,KOG1187@2759|Eukaryota,37SAE@33090|Viridiplantae,3GDPX@35493|Streptophyta,4JKMW@91835|fabids	35493|Streptophyta	T	LysM domain	-	GO:0003674,GO:0003824,GO:0004672,GO:0004674,GO:0004675,GO:0004888,GO:0005575,GO:0005623,GO:0005886,GO:0006464,GO:0006468,GO:0006793,GO:0006796,GO:0006807,GO:0007154,GO:0007165,GO:0007166,GO:0007167,GO:0007178,GO:0008150,GO:0008152,GO:0009987,GO:0016020,GO:0016301,GO:0016310,GO:0016740,GO:0016772,GO:0016773,GO:0019199,GO:0019538,GO:0023052,GO:0036211,GO:0038023,GO:0043170,GO:0043412,GO:0044237,GO:…	-	-	-	-	-	-	-	-	-	-	LysM,Pkinase,Pkinase_Tyr
BPChr13G24642	1.85028	5.85887e-05	0.00119303	BPChr13G24642	2711.XP_006464396.1	1.9e-65	256.5	28KFZ@1|root,2QS67@2759|Eukaryota,37Q6Q@33090|Viridiplantae,3GBIX@35493|Streptophyta	35493|Streptophyta	S	At1g28695-like	-	GO:0003674,GO:0003676,GO:0003723,GO:0003824,GO:0004518,GO:0004519,GO:0005488,GO:0005575,GO:0005622,GO:0005623,GO:0006139,GO:0006725,GO:0006807,GO:0008150,GO:0008152,GO:0009451,GO:0009987,GO:0016070,GO:0016787,GO:0016788,GO:0034641,GO:0043170,GO:0043226,GO:0043227,GO:0043229,GO:0043231,GO:0043412,GO:0044237,GO:0044238,GO:0044424,GO:0044464,GO:0046483,GO:0071704,GO:0090304,GO:0090305,GO:0097159,GO:…	-	-	-	-	-	-	-	-	-	-	Nucleotid_trans
BPChr14G04195	1.84561	0.00128222	0.0146971	BPChr14G04195	2711.XP_006481400.1	0.0	1424.1	KOG1408@1|root,KOG1408@2759|Eukaryota,37HGA@33090|Viridiplantae,3GAZE@35493|Streptophyta	35493|Streptophyta	S	Mitogen-activated protein kinase-binding protein	-	GO:0000922,GO:0001817,GO:0001818,GO:0002791,GO:0002792,GO:0002831,GO:0002832,GO:0003674,GO:0003676,GO:0003723,GO:0005488,GO:0005575,GO:0005622,GO:0005623,GO:0005634,GO:0005681,GO:0005682,GO:0005737,GO:0005819,GO:0005856,GO:0006139,GO:0006396,GO:0006725,GO:0006807,GO:0008150,GO:0008152,GO:0008380,GO:0009966,GO:0009968,GO:0009987,GO:0010467,GO:0010646,GO:0010648,GO:0015630,GO:0016070,GO:0023051,GO:…	-	ko:K21763	-	-	-	-	ko00000,ko03036	-	-	-	WD40
BPChr06G08514	1.84294	4.67872e-07	1.73254e-05	BPChr06G08514	57918.XP_004303736.1	4.5e-35	154.8	2CYI5@1|root,2S4IX@2759|Eukaryota,37MDS@33090|Viridiplantae,3GFM8@35493|Streptophyta,4JSH7@91835|fabids	35493|Streptophyta	S	Belongs to the 'GDSL' lipolytic enzyme family	-	GO:0000325,GO:0005575,GO:0005622,GO:0005623,GO:0005737,GO:0005773,GO:0005774,GO:0005783,GO:0005911,GO:0006810,GO:0006886,GO:0006996,GO:0007029,GO:0008104,GO:0008150,GO:0009506,GO:0009705,GO:0009987,GO:0010168,GO:0010256,GO:0012505,GO:0015031,GO:0015833,GO:0016020,GO:0016043,GO:0030054,GO:0031090,GO:0032527,GO:0033036,GO:0034613,GO:0042886,GO:0043226,GO:0043227,GO:0043229,GO:0043231,GO:0044422,GO:…	-	-	-	-	-	-	-	-	-	-	Lipase_GDSL
BPChr05G21087	1.83449	4.87529e-23	1.20889e-20	BPChr05G21087	2711.XP_006480002.1	1.2e-261	908.7	2CM77@1|root,2QPI6@2759|Eukaryota,37P55@33090|Viridiplantae,3G86B@35493|Streptophyta	35493|Streptophyta	G	Endoglucanase	-	GO:0003674,GO:0003824,GO:0004553,GO:0007275,GO:0007389,GO:0008150,GO:0008810,GO:0009605,GO:0009607,GO:0009624,GO:0016787,GO:0016798,GO:0032501,GO:0032502,GO:0043207,GO:0048856,GO:0050896,GO:0051704,GO:0051707	-	-	-	-	-	-	-	-	-	-	Glyco_hydro_9
BPChr07G22640	1.83256	3.48955e-08	1.61219e-06	BPChr07G22640	3760.EMJ13320	9.6e-81	306.6	KOG1944@1|root,KOG1944@2759|Eukaryota,37IMS@33090|Viridiplantae,3GGRB@35493|Streptophyta,4JDVG@91835|fabids	35493|Streptophyta	S	Belongs to the peroxisomal membrane protein PXMP2 4 family	-	GO:0005575,GO:0005622,GO:0005623,GO:0005737,GO:0005777,GO:0005778,GO:0005779,GO:0016020,GO:0016021,GO:0031090,GO:0031224,GO:0031231,GO:0031300,GO:0031301,GO:0031903,GO:0042579,GO:0043226,GO:0043227,GO:0043229,GO:0043231,GO:0044422,GO:0044424,GO:0044425,GO:0044438,GO:0044439,GO:0044444,GO:0044446,GO:0044464,GO:0098588,GO:0098805	-	ko:K13347	ko04146,map04146	-	-	-	ko00000,ko00001	-	-	-	Mpv17_PMP22
BPChr06G19412	1.83211	0.0024466	0.0244448	BPChr06G19412	3988.XP_002515541.1	4.7e-106	392.9	2CXK1@1|root,2RY48@2759|Eukaryota,37TVD@33090|Viridiplantae,3GAE2@35493|Streptophyta,4JTST@91835|fabids	35493|Streptophyta	S	Plant protein of unknown function	-	-	-	-	-	-	-	-	-	-	-	-	DUF247
BPChr02G22031	1.82899	0.000448182	0.00628334	BPChr02G22031	3760.EMJ22572	1.4e-80	306.6	COG0666@1|root,KOG0504@2759|Eukaryota	2759|Eukaryota	I	protein ubiquitination	-	-	-	-	-	-	-	-	-	-	-	-	PGG
BPChr11G05695	1.82729	1.51337e-10	1.055e-08	BPChr11G05695	225117.XP_009344538.1	3.9e-107	395.2	28N0B@1|root,2RNNC@2759|Eukaryota,37KKF@33090|Viridiplantae,3GBAH@35493|Streptophyta,4JSRQ@91835|fabids	35493|Streptophyta	S	WAT1-related protein	-	GO:0003674,GO:0005215,GO:0005575,GO:0005622,GO:0005623,GO:0005737,GO:0005886,GO:0005887,GO:0005938,GO:0006810,GO:0007154,GO:0007165,GO:0008150,GO:0009719,GO:0009725,GO:0009733,GO:0009734,GO:0009755,GO:0009987,GO:0010033,GO:0016020,GO:0016021,GO:0022857,GO:0023052,GO:0031224,GO:0031226,GO:0032870,GO:0042221,GO:0044424,GO:0044425,GO:0044444,GO:0044459,GO:0044464,GO:0050789,GO:0050794,GO:0050896,GO:…	-	-	-	-	-	-	-	-	-	-	EamA
BPChr12G25901	1.82724	4.39205e-13	4.80647e-11	BPChr12G25901	102107.XP_008220793.1	8.9e-143	513.1	KOG1470@1|root,KOG1470@2759|Eukaryota,37M33@33090|Viridiplantae,3G7C9@35493|Streptophyta,4JJ96@91835|fabids	35493|Streptophyta	I	CRAL/TRIO, N-terminal domain	-	-	-	-	-	-	-	-	-	-	-	-	CRAL_TRIO,CRAL_TRIO_N
BPChr08G15416	1.80571	1.80155e-08	8.867e-07	BPChr08G15416	3641.EOX99103	2.6e-143	515.4	COG0484@1|root,KOG0716@2759|Eukaryota,37NN1@33090|Viridiplantae,3GE63@35493|Streptophyta	35493|Streptophyta	O	DNAJ heat shock N-terminal domain-containing protein	-	GO:0005575,GO:0005622,GO:0005623,GO:0005737,GO:0009507,GO:0009536,GO:0043226,GO:0043227,GO:0043229,GO:0043231,GO:0044424,GO:0044444,GO:0044464	-	-	-	-	-	-	-	-	-	-	DnaJ,Fer4_13
BPChr08G10764	1.80406	5.06728e-07	1.86585e-05	BPChr08G10764	102107.XP_008224259.1	0.0	1132.9	COG0659@1|root,KOG0236@2759|Eukaryota,37M8H@33090|Viridiplantae,3G9ZH@35493|Streptophyta,4JCY8@91835|fabids	35493|Streptophyta	P	Sulfate transporter	-	GO:0003674,GO:0005215,GO:0005575,GO:0005622,GO:0005623,GO:0005737,GO:0005886,GO:0005887,GO:0006810,GO:0006811,GO:0006820,GO:0008150,GO:0008272,GO:0008509,GO:0009507,GO:0009536,GO:0015075,GO:0015103,GO:0015116,GO:0015318,GO:0015698,GO:0016020,GO:0016021,GO:0022857,GO:0031224,GO:0031226,GO:0034220,GO:0043226,GO:0043227,GO:0043229,GO:0043231,GO:0044424,GO:0044425,GO:0044444,GO:0044459,GO:0044464,GO:…	-	ko:K17471	-	-	-	-	ko00000,ko02000	2.A.53.1	-	-	STAS,Sulfate_transp
BPChr06G20899	1.80398	5.69955e-05	0.00116787	BPChr06G20899	3641.EOY27185	0.0	2208.7	COG5022@1|root,KOG0160@2759|Eukaryota,37MUF@33090|Viridiplantae,3G8Q6@35493|Streptophyta	35493|Streptophyta	Z	Belongs to the TRAFAC class myosin-kinesin ATPase superfamily. Myosin family	-	GO:0000003,GO:0000902,GO:0000904,GO:0003006,GO:0003674,GO:0003774,GO:0003824,GO:0005488,GO:0005515,GO:0006928,GO:0007275,GO:0008150,GO:0009653,GO:0009791,GO:0009826,GO:0009888,GO:0009908,GO:0009987,GO:0010026,GO:0010090,GO:0010154,GO:0016043,GO:0016049,GO:0016462,GO:0016787,GO:0016817,GO:0016818,GO:0017111,GO:0022414,GO:0030029,GO:0030048,GO:0030154,GO:0032501,GO:0032502,GO:0032989,GO:0040007,GO:…	-	ko:K10357	-	-	-	-	ko00000,ko03019,ko03029,ko04131,ko04812	-	-	-	DIL,IQ,Myosin_N,Myosin_head
BPChr13G23043	1.80007	0.00281345	0.0273105	BPChr13G23043	3656.XP_008462956.1	1.5e-81	309.3	28PYD@1|root,2QWKY@2759|Eukaryota,37RNF@33090|Viridiplantae,3G9D2@35493|Streptophyta,4JETA@91835|fabids	35493|Streptophyta	S	protein DS12 from 2D-PAGE of leaf	-	GO:0005575,GO:0005622,GO:0005623,GO:0005737,GO:0006950,GO:0008150,GO:0009266,GO:0009314,GO:0009409,GO:0009416,GO:0009507,GO:0009526,GO:0009532,GO:0009534,GO:0009535,GO:0009536,GO:0009570,GO:0009579,GO:0009628,GO:0009719,GO:0009725,GO:0009735,GO:0009743,GO:0009744,GO:0009941,GO:0010033,GO:0010319,GO:0016020,GO:0031967,GO:0031975,GO:0031976,GO:0031984,GO:0034285,GO:0034357,GO:0042221,GO:0042651,GO:…	-	-	-	-	-	-	-	-	-	-	-
BPChr01G26473	1.79917	0.000337691	0.0050228	BPChr01G26473	102107.XP_008221402.1	2.5e-154	552.7	COG5059@1|root,KOG0242@2759|Eukaryota,37JWB@33090|Viridiplantae,3GDGJ@35493|Streptophyta,4JN74@91835|fabids	35493|Streptophyta	Z	Belongs to the TRAFAC class myosin-kinesin ATPase superfamily. Kinesin family	-	GO:0000226,GO:0000278,GO:0000280,GO:0003674,GO:0003774,GO:0003777,GO:0003824,GO:0005575,GO:0005622,GO:0005623,GO:0005856,GO:0005871,GO:0005875,GO:0006928,GO:0006996,GO:0007010,GO:0007017,GO:0007018,GO:0007049,GO:0007051,GO:0007052,GO:0007059,GO:0008150,GO:0008574,GO:0009987,GO:0015630,GO:0016043,GO:0016462,GO:0016787,GO:0016817,GO:0016818,GO:0016887,GO:0017111,GO:0022402,GO:0022607,GO:0032991,GO:…	-	ko:K10401	-	-	-	-	ko00000,ko04812	-	-	-	Kinesin
BPChr11G19172	1.78856	0.00351142	0.0321665	BPChr11G19172	4098.XP_009601546.1	1.2e-11	76.3	2C5NK@1|root,2S2YF@2759|Eukaryota,37UCV@33090|Viridiplantae,3GHX0@35493|Streptophyta,44MIV@71274|asterids	35493|Streptophyta	S	F-box-like	-	-	-	-	-	-	-	-	-	-	-	-	F-box,F-box-like,FBA_1,FBA_3
BPChr04G24488	1.78494	4.1148e-08	1.87018e-06	BPChr04G24488	2711.XP_006481240.1	7.4e-103	380.2	28JYA@1|root,2QSCQ@2759|Eukaryota,37RR4@33090|Viridiplantae,3GD4F@35493|Streptophyta	35493|Streptophyta	S	acetyltransferase	NSI	GO:0003674,GO:0003824,GO:0004059,GO:0005575,GO:0005622,GO:0005623,GO:0005634,GO:0005737,GO:0006725,GO:0006807,GO:0008080,GO:0008150,GO:0008152,GO:0009058,GO:0009507,GO:0009536,GO:0009987,GO:0010817,GO:0016407,GO:0016410,GO:0016740,GO:0016746,GO:0016747,GO:0017144,GO:0018130,GO:0019438,GO:0030186,GO:0030187,GO:0034641,GO:0034754,GO:0042430,GO:0042435,GO:0042445,GO:0042446,GO:0043226,GO:0043227,GO:…	2.3.1.87	ko:K22450	ko00380,map00380	M00037	R02911	RC00004,RC00096	ko00000,ko00001,ko00002,ko01000	-	-	-	Acetyltransf_1,Acetyltransf_10
BPChr07G09987	1.78374	0.00209243	0.0215956	BPChr07G09987	29760.VIT_14s0083g01110.t01	2e-243	848.2	COG2124@1|root,KOG0157@2759|Eukaryota,37KM6@33090|Viridiplantae,3GGY7@35493|Streptophyta	35493|Streptophyta	Q	cytochrome P450	CYP85A3	GO:0000226,GO:0001578,GO:0003674,GO:0003824,GO:0004497,GO:0006091,GO:0006629,GO:0006694,GO:0006996,GO:0007010,GO:0007017,GO:0007275,GO:0008150,GO:0008152,GO:0008202,GO:0008610,GO:0009058,GO:0009314,GO:0009416,GO:0009628,GO:0009642,GO:0009646,GO:0009647,GO:0009791,GO:0009987,GO:0010268,GO:0010817,GO:0016043,GO:0016125,GO:0016128,GO:0016129,GO:0016131,GO:0016132,GO:0016491,GO:0022900,GO:0032501,GO:…	-	ko:K09590	ko00905,ko01100,ko01110,map00905,map01100,map01110	M00371	R07450,R07451,R07455,R07457,R07458,R10669	RC00154,RC00661,RC02079	ko00000,ko00001,ko00002,ko00199,ko01000	-	-	-	p450
BPChr11G07438	1.78082	0.000101746	0.00185578	BPChr11G07438	85681.XP_006421649.1	0.0	1741.1	COG1196@1|root,KOG0933@2759|Eukaryota,37IA8@33090|Viridiplantae,3GAX1@35493|Streptophyta	35493|Streptophyta	BD	Structural maintenance of chromosomes protein	-	GO:0000793,GO:0000796,GO:0003674,GO:0005215,GO:0005575,GO:0005622,GO:0005623,GO:0005634,GO:0005694,GO:0032991,GO:0043226,GO:0043227,GO:0043228,GO:0043229,GO:0043231,GO:0043232,GO:0044422,GO:0044424,GO:0044427,GO:0044446,GO:0044464,GO:0044815	-	ko:K06674	ko04111,map04111	-	-	-	ko00000,ko00001,ko03036	-	-	-	SMC_N,SMC_hinge
BPChr06G07932	1.77891	0.0057176	0.0459401	BPChr06G07932	102107.XP_008233260.1	5e-192	677.2	28H7C@1|root,2QPK3@2759|Eukaryota,37I64@33090|Viridiplantae,3G8E0@35493|Streptophyta,4JMMD@91835|fabids	35493|Streptophyta	S	ACT domain-containing protein	-	-	-	-	-	-	-	-	-	-	-	-	-
BPChr11G28759	1.76608	0.00221469	0.0225766	BPChr11G28759	29760.VIT_12s0059g01070.t01	4.4e-279	967.2	COG5229@1|root,KOG2328@2759|Eukaryota,37KYS@33090|Viridiplantae,3GA0I@35493|Streptophyta	35493|Streptophyta	BD	Regulatory subunit of the condensin complex, a complex required for conversion of interphase chromatin into mitotic-like condense chromosomes	-	GO:0000070,GO:0000228,GO:0000278,GO:0000280,GO:0000793,GO:0000794,GO:0000796,GO:0000799,GO:0000819,GO:0001671,GO:0003674,GO:0003682,GO:0005488,GO:0005515,GO:0005575,GO:0005622,GO:0005623,GO:0005634,GO:0005694,GO:0005737,GO:0006323,GO:0006996,GO:0007049,GO:0007059,GO:0007076,GO:0008047,GO:0008150,GO:0009987,GO:0010911,GO:0010912,GO:0016043,GO:0019899,GO:0022402,GO:0030234,GO:0030261,GO:0031974,GO:…	-	ko:K06676	ko04111,map04111	-	-	-	ko00000,ko00001,ko03036	-	-	-	Cnd2
BPChr01G17200	1.76279	6.78412e-05	0.00133864	BPChr01G17200	3760.EMJ28654	2.6e-108	398.7	COG5235@1|root,KOG3108@2759|Eukaryota,37Q34@33090|Viridiplantae,3GCKD@35493|Streptophyta,4JDU3@91835|fabids	35493|Streptophyta	L	Replication protein A 32 kDa subunit	-	GO:0000228,GO:0000278,GO:0005575,GO:0005622,GO:0005623,GO:0005634,GO:0005657,GO:0005662,GO:0005694,GO:0006139,GO:0006259,GO:0006260,GO:0006261,GO:0006269,GO:0006281,GO:0006310,GO:0006725,GO:0006807,GO:0006950,GO:0006974,GO:0007049,GO:0008150,GO:0008152,GO:0009058,GO:0009059,GO:0009892,GO:0009987,GO:0010468,GO:0010605,GO:0010629,GO:0016070,GO:0016458,GO:0018130,GO:0019222,GO:0019438,GO:0022402,GO:…	-	ko:K10739	ko03030,ko03420,ko03430,ko03440,ko03460,map03030,map03420,map03430,map03440,map03460	M00288	-	-	ko00000,ko00001,ko00002,ko03032,ko03400	-	-	-	RPA_C,tRNA_anti-codon
BPChr08G13261	1.76268	1.94884e-05	0.000461061	BPChr08G13261	3694.POPTR_0010s08170.1	1.4e-89	335.9	KOG0406@1|root,KOG0406@2759|Eukaryota,37T5N@33090|Viridiplantae,3GEHR@35493|Streptophyta,4JSXR@91835|fabids	35493|Streptophyta	O	Belongs to the GST superfamily	-	-	2.5.1.18	ko:K00799	ko00480,ko00980,ko00982,ko00983,ko01524,ko05200,ko05204,ko05225,ko05418,map00480,map00980,map00982,map00983,map01524,map05200,map05204,map05225,map05418	-	R03522,R07002,R07003,R07004,R07023,R07024,R07025,R07026,R07069,R07070,R07083,R07084,R07091,R07092,R07093,R07094,R07100,R07113,R07116,R08280,R09409,R11905	RC00004,RC00069,RC00840,RC00948,RC01704,RC01705,RC01706,RC01758,RC01759,RC01765,RC01767,RC01769,RC02243,RC02527,RC02939,RC02940,RC02942,RC02943,RC02944	ko00000,ko00001,ko01000,ko02000	1.A.12.2.2,1.A.12.3.2	-	-	GST_C,GST_N
BPChr08G05024	1.76073	0.00359728	0.0327145	BPChr08G05024	3694.POPTR_0010s15920.1	1.8e-206	725.3	COG2939@1|root,KOG1282@2759|Eukaryota,37QTA@33090|Viridiplantae,3GBT8@35493|Streptophyta,4JSGN@91835|fabids	35493|Streptophyta	O	Belongs to the peptidase S10 family	-	GO:0003674,GO:0003824,GO:0004180,GO:0004185,GO:0005575,GO:0005622,GO:0005623,GO:0005737,GO:0005773,GO:0006508,GO:0006807,GO:0008150,GO:0008152,GO:0008233,GO:0008236,GO:0008238,GO:0009056,GO:0009057,GO:0009987,GO:0016787,GO:0017171,GO:0019538,GO:0030163,GO:0043170,GO:0043226,GO:0043227,GO:0043229,GO:0043231,GO:0044237,GO:0044238,GO:0044248,GO:0044257,GO:0044260,GO:0044265,GO:0044267,GO:0044424,GO:…	-	ko:K16297	-	-	-	-	ko00000,ko01000,ko01002	-	-	-	Peptidase_S10
BPChr09G14485	1.75802	1.38774e-17	2.22823e-15	BPChr09G14485	3760.EMJ28233	0.0	1758.0	2CMVN@1|root,2QS81@2759|Eukaryota,37QCI@33090|Viridiplantae,3G9HZ@35493|Streptophyta,4JE84@91835|fabids	35493|Streptophyta	S	Methionine	MMT	GO:0001887,GO:0003674,GO:0003824,GO:0005575,GO:0005622,GO:0005623,GO:0005737,GO:0005829,GO:0006732,GO:0006790,GO:0008150,GO:0008152,GO:0008168,GO:0008757,GO:0009987,GO:0016740,GO:0016741,GO:0017144,GO:0032259,GO:0044237,GO:0044424,GO:0044444,GO:0044464,GO:0046500,GO:0051186,GO:0071704	2.1.1.12	ko:K08247	ko00450,map00450	-	R04772	RC00003,RC01212	ko00000,ko00001,ko01000	-	-	-	Aminotran_1_2,MTS,Methyltransf_31
BPChr11G26268	1.74743	0.00357317	0.0325709	BPChr11G26268	4096.XP_009798435.1	0.0	1146.0	COG1297@1|root,2QQ2H@2759|Eukaryota,37MXX@33090|Viridiplantae,3G7VN@35493|Streptophyta,44P3V@71274|asterids	35493|Streptophyta	S	metal-nicotianamine transporter YSL7	-	GO:0003674,GO:0005215,GO:0005575,GO:0005623,GO:0005886,GO:0006810,GO:0008150,GO:0016020,GO:0022857,GO:0044464,GO:0051179,GO:0051234,GO:0055085,GO:0071944	-	-	-	-	-	-	-	-	-	-	OPT
BPChr14G01996	1.73521	2.04563e-05	0.000479902	BPChr14G01996	3694.POPTR_0006s24330.1	1.2e-128	466.5	COG5169@1|root,KOG0627@2759|Eukaryota,37IE8@33090|Viridiplantae,3GFNV@35493|Streptophyta,4JIJ9@91835|fabids	35493|Streptophyta	K	Heat shock factor protein	-	GO:0000302,GO:0001067,GO:0001666,GO:0003674,GO:0003676,GO:0003677,GO:0003700,GO:0005488,GO:0005575,GO:0005622,GO:0005623,GO:0005634,GO:0006355,GO:0006950,GO:0006979,GO:0006986,GO:0008150,GO:0009266,GO:0009314,GO:0009408,GO:0009416,GO:0009628,GO:0009636,GO:0009642,GO:0009644,GO:0009889,GO:0009891,GO:0009893,GO:0009987,GO:0010033,GO:0010035,GO:0010200,GO:0010243,GO:0010286,GO:0010468,GO:0010556,GO:…	-	ko:K09419	-	-	-	-	ko00000,ko03000	-	-	-	HSF_DNA-bind
BPChr14G12300	1.73398	0.0022532	0.0229169	BPChr14G12300	29760.VIT_08s0007g02550.t01	7.2e-55	220.3	28KGU@1|root,2S0X5@2759|Eukaryota,37UQ7@33090|Viridiplantae,3GIRY@35493|Streptophyta	35493|Streptophyta	S	transcription repressor	-	GO:0005575,GO:0005622,GO:0005623,GO:0005634,GO:0005737,GO:0008150,GO:0009966,GO:0010646,GO:0023051,GO:0043226,GO:0043227,GO:0043229,GO:0043231,GO:0044424,GO:0044464,GO:0048583,GO:0050789,GO:0050794,GO:0065007,GO:1900457	-	-	-	-	-	-	-	-	-	-	Ovate
BPChr11G14320	1.73212	2.26217e-26	6.7142e-24	BPChr11G14320	2711.XP_006488487.1	0.0	1827.4	COG0465@1|root,KOG0731@2759|Eukaryota,38A1Y@33090|Viridiplantae,3GXCV@35493|Streptophyta	35493|Streptophyta	O	Radical SAM ThiC family	-	-	4.1.99.17	ko:K03147	ko00730,ko01100,map00730,map01100	M00127	R03472	RC03251,RC03252	ko00000,ko00001,ko00002,ko01000	-	-	-	AAA,FtsH_ext,ThiC_Rad_SAM
BPChr05G27357	1.72958	0.000202631	0.00327774	BPChr05G27357	85681.XP_006444588.1	1.2e-271	942.2	COG0823@1|root,2QPTW@2759|Eukaryota,37K0C@33090|Viridiplantae,3GE93@35493|Streptophyta	35493|Streptophyta	U	WD40-like Beta Propeller Repeat	-	-	-	-	-	-	-	-	-	-	-	-	DPPIV_N,PD40
BPChr11G17617	1.7293	3.30294e-12	3.19846e-10	BPChr11G17617	3694.POPTR_0019s15170.1	1.7e-76	292.4	2AIJ0@1|root,2RZ4X@2759|Eukaryota,37UIZ@33090|Viridiplantae,3GJ5Y@35493|Streptophyta,4JSYP@91835|fabids	35493|Streptophyta	S	Alpha/beta hydrolase family	-	GO:0003674,GO:0003824,GO:0006082,GO:0006725,GO:0006807,GO:0007275,GO:0008150,GO:0008152,GO:0009683,GO:0009850,GO:0009987,GO:0010817,GO:0016787,GO:0016788,GO:0019752,GO:0032501,GO:0032502,GO:0032787,GO:0033473,GO:0034641,GO:0034754,GO:0042430,GO:0042445,GO:0043436,GO:0044237,GO:0044281,GO:0046483,GO:0048367,GO:0048731,GO:0048856,GO:0052689,GO:0065007,GO:0065008,GO:0071704,GO:0080030,GO:1901360,GO:…	-	-	-	-	-	-	-	-	-	-	Abhydrolase_1,Abhydrolase_6
BPChr12G25777	1.72673	0.00457611	0.0390802	BPChr12G25777	3694.POPTR_0014s02700.1	6e-151	540.4	COG5169@1|root,KOG0627@2759|Eukaryota,37NYK@33090|Viridiplantae,3G99D@35493|Streptophyta,4JI1W@91835|fabids	35493|Streptophyta	K	Heat Stress Transcription Factor	-	GO:0003674,GO:0003700,GO:0006355,GO:0008150,GO:0008356,GO:0009889,GO:0009987,GO:0010468,GO:0010556,GO:0019219,GO:0019222,GO:0031323,GO:0031326,GO:0050789,GO:0050794,GO:0051171,GO:0051252,GO:0051301,GO:0060255,GO:0065007,GO:0080090,GO:0140110,GO:1903506,GO:2000112,GO:2001141	-	ko:K09419	-	-	-	-	ko00000,ko03000	-	-	-	HSF_DNA-bind
BPChr08G16167	1.72097	0.00259397	0.0255107	BPChr08G16167	102107.XP_008235419.1	7.4e-131	473.8	KOG0656@1|root,KOG0656@2759|Eukaryota,37KZR@33090|Viridiplantae,3GZAI@35493|Streptophyta,4JDW9@91835|fabids	35493|Streptophyta	D	Belongs to the cyclin family	-	GO:0005575,GO:0005622,GO:0005623,GO:0005634,GO:0005737,GO:0007275,GO:0008150,GO:0009791,GO:0009888,GO:0009987,GO:0010374,GO:0010440,GO:0032501,GO:0032502,GO:0043226,GO:0043227,GO:0043229,GO:0043231,GO:0044424,GO:0044464,GO:0048856,GO:0048869,GO:0090558	-	ko:K18810	-	M00692	-	-	ko00000,ko00002	-	-	-	Cyclin_C,Cyclin_N
BPChr09G29913	1.71957	0.000388015	0.00565118	BPChr09G29913	3750.XP_008373213.1	2.8e-235	822.0	28III@1|root,2QQVI@2759|Eukaryota,37N1F@33090|Viridiplantae,3G916@35493|Streptophyta,4JSIM@91835|fabids	35493|Streptophyta	S	At4g38062-like	-	-	-	ko:K20283,ko:K20478	-	-	-	-	ko00000,ko04131	-	-	-	-
BPChr04G10466	1.71743	1.8907e-15	2.62673e-13	BPChr04G10466	3694.POPTR_0003s20980.1	1.9e-163	582.0	28NR1@1|root,2QVB2@2759|Eukaryota,37HM8@33090|Viridiplantae,3GA7F@35493|Streptophyta,4JJPQ@91835|fabids	35493|Streptophyta	S	Neprosin	-	-	-	-	-	-	-	-	-	-	-	-	Neprosin,Neprosin_AP
BPChr05G22460	1.70991	3.68217e-20	7.14159e-18	BPChr05G22460	3694.POPTR_0013s00380.1	1.2e-232	812.4	KOG1339@1|root,KOG1339@2759|Eukaryota,37P32@33090|Viridiplantae,3G95Y@35493|Streptophyta,4JJNU@91835|fabids	35493|Streptophyta	O	Belongs to the peptidase A1 family	-	GO:0003674,GO:0003824,GO:0004175,GO:0004190,GO:0006508,GO:0006807,GO:0008150,GO:0008152,GO:0008233,GO:0009056,GO:0009057,GO:0016787,GO:0019538,GO:0030163,GO:0043170,GO:0044238,GO:0070001,GO:0070011,GO:0071704,GO:0140096,GO:1901564,GO:1901565,GO:1901575	3.4.23.40	ko:K08245	-	-	-	-	ko00000,ko01000,ko01002	-	-	-	Asp,SapB_1,SapB_2
BPChr07G02871	1.70394	9.55592e-10	5.7775e-08	BPChr07G02871	225117.XP_009353966.1	2.6e-76	293.5	KOG4197@1|root,KOG4197@2759|Eukaryota,37R67@33090|Viridiplantae,3GAUT@35493|Streptophyta,4JHVN@91835|fabids	35493|Streptophyta	O	Pentatricopeptide repeat-containing protein	-	GO:0003674,GO:0003676,GO:0003723,GO:0003824,GO:0004518,GO:0004519,GO:0005488,GO:0005575,GO:0005622,GO:0005623,GO:0006139,GO:0006725,GO:0006807,GO:0008150,GO:0008152,GO:0009451,GO:0009987,GO:0016070,GO:0016787,GO:0016788,GO:0034641,GO:0043170,GO:0043226,GO:0043227,GO:0043229,GO:0043231,GO:0043412,GO:0044237,GO:0044238,GO:0044424,GO:0044464,GO:0046483,GO:0071704,GO:0090304,GO:0090305,GO:0097159,GO:…	-	-	-	-	-	-	-	-	-	-	PPR,PPR_2,PPR_3
BPChr12G08409	1.70296	9.0622e-16	1.32477e-13	BPChr12G08409	4155.Migut.C01039.1.p	3.2e-240	837.4	COG2939@1|root,KOG1282@2759|Eukaryota,37KNC@33090|Viridiplantae,3GBVK@35493|Streptophyta,44FJU@71274|asterids	35493|Streptophyta	O	Belongs to the peptidase S10 family	-	GO:0003674,GO:0003824,GO:0004180,GO:0004185,GO:0005575,GO:0005618,GO:0005623,GO:0006508,GO:0006807,GO:0008150,GO:0008152,GO:0008233,GO:0008236,GO:0008238,GO:0009056,GO:0009057,GO:0009987,GO:0016787,GO:0017171,GO:0019538,GO:0030163,GO:0030312,GO:0043170,GO:0044237,GO:0044238,GO:0044248,GO:0044257,GO:0044260,GO:0044265,GO:0044267,GO:0044464,GO:0051603,GO:0070008,GO:0070011,GO:0071704,GO:0071944,GO:…	-	ko:K16297	-	-	-	-	ko00000,ko01000,ko01002	-	-	-	Peptidase_S10
BPChr10G21596	1.70176	7.80794e-15	1.00579e-12	BPChr10G21596	3983.cassava4.1_024384m	2.3e-177	629.4	COG1253@1|root,KOG2118@2759|Eukaryota,37KG4@33090|Viridiplantae,3GBMQ@35493|Streptophyta,4JDT2@91835|fabids	35493|Streptophyta	S	DUF21 domain-containing protein	-	-	-	ko:K16302	-	-	-	-	ko00000,ko02000	9.A.40.3	-	-	DUF21
BPChr04G00575	1.68982	0.00233102	0.0235396	BPChr04G00575	3760.EMJ14778	6e-55	221.5	2AAWN@1|root,2RYCX@2759|Eukaryota,37TU5@33090|Viridiplantae,3GI3E@35493|Streptophyta,4JPRG@91835|fabids	35493|Streptophyta	-	-	-	-	-	-	-	-	-	-	-	-	-	-	DUF1685
BPChr13G07716	1.68737	0.000550946	0.00745852	BPChr13G07716	3760.EMJ20451	5.6e-155	554.7	COG2124@1|root,KOG0156@2759|Eukaryota,37HJG@33090|Viridiplantae,3GCVP@35493|Streptophyta,4JGCT@91835|fabids	35493|Streptophyta	Q	Cytochrome p450	-	GO:0003674,GO:0003824,GO:0004497,GO:0005575,GO:0005622,GO:0005623,GO:0005737,GO:0005783,GO:0005911,GO:0006629,GO:0006720,GO:0006721,GO:0006722,GO:0006950,GO:0006952,GO:0007275,GO:0008150,GO:0008152,GO:0008299,GO:0008610,GO:0009058,GO:0009506,GO:0009605,GO:0009606,GO:0009607,GO:0009620,GO:0009628,GO:0009629,GO:0009630,GO:0009812,GO:0009958,GO:0009987,GO:0010683,GO:0012505,GO:0016020,GO:0016491,GO:…	1.14.14.1,1.14.14.19,1.14.14.32	ko:K00512,ko:K07408,ko:K07418	ko00140,ko00380,ko00590,ko00591,ko00830,ko00980,ko01100,ko04212,ko04726,ko04750,ko04913,ko04917,ko04927,ko04934,ko05204,map00140,map00380,map00590,map00591,map00830,map00980,map01100,map04212,map04726,map04750,map04913,map04917,map04927,map04934,map05204	M00109,M00110	R02211,R02354,R02355,R03089,R03408,R03629,R03783,R04852,R04853,R07000,R07001,R07021,R07022,R07042,R07043,R07044,R07045,R07046,R07048,R07050,R07051,R07052,R07055,R07056,R07079,R07080,R07081,R07085,R07087,R07098,R07099,R08390,R08392,R08517,R08518,R09418,R09423,R09442	RC00046,RC00607,RC00660,RC00661,RC00704,RC00723,RC00724,RC00923,RC01184,RC01222,RC01444,RC01445,RC01710,RC01711,RC01723,RC01725,RC01727,RC01732,RC01733,RC02531	ko00000,ko00001,ko00002,ko00199,ko01000	-	-	-	p450
BPunChr33600	1.68681	1.91221e-09	1.10497e-07	BPunChr33600	3641.EOY24131	1.5e-210	738.8	2CJU3@1|root,2QTBX@2759|Eukaryota,37IM6@33090|Viridiplantae,3GDU5@35493|Streptophyta	35493|Streptophyta	G	beta-amylase	-	GO:0000272,GO:0001101,GO:0003674,GO:0003824,GO:0004553,GO:0005575,GO:0005622,GO:0005623,GO:0005634,GO:0005737,GO:0005829,GO:0005975,GO:0005976,GO:0005982,GO:0005983,GO:0006073,GO:0006950,GO:0008150,GO:0008152,GO:0009056,GO:0009057,GO:0009251,GO:0009414,GO:0009415,GO:0009628,GO:0009987,GO:0010035,GO:0016052,GO:0016160,GO:0016161,GO:0016787,GO:0016798,GO:0042221,GO:0043170,GO:0043226,GO:0043227,GO:…	3.2.1.2	ko:K01177	ko00500,map00500	-	R02112,R11262	-	ko00000,ko00001,ko01000	-	GH14	-	Glyco_hydro_14
BPChr02G00370	1.68519	0.00439885	0.0379934	BPChr02G00370	225117.XP_009373579.1	5.6e-106	392.5	28X0X@1|root,2R3TB@2759|Eukaryota,37P5N@33090|Viridiplantae,3GHTD@35493|Streptophyta,4JNYQ@91835|fabids	35493|Streptophyta	-	-	-	-	-	-	-	-	-	-	-	-	-	-	-
BPChr07G02855	1.68499	3.74456e-05	0.000821412	BPChr07G02855	29760.VIT_16s0039g02400.t01	0.0	1389.4	KOG0597@1|root,KOG0597@2759|Eukaryota,37J8D@33090|Viridiplantae,3GEBY@35493|Streptophyta	35493|Streptophyta	T	serine threonine-protein kinase	-	GO:0000166,GO:0001101,GO:0003674,GO:0003824,GO:0004672,GO:0004674,GO:0005488,GO:0005515,GO:0005524,GO:0005575,GO:0005622,GO:0005623,GO:0005634,GO:0005737,GO:0005829,GO:0005856,GO:0005874,GO:0005881,GO:0006355,GO:0006464,GO:0006468,GO:0006793,GO:0006796,GO:0006807,GO:0006935,GO:0006996,GO:0007154,GO:0007163,GO:0007165,GO:0007166,GO:0007224,GO:0007227,GO:0007228,GO:0007275,GO:0007584,GO:0008064,GO:…	2.7.11.1	ko:K06228	ko04341,map04341	-	-	-	ko00000,ko00001,ko01000,ko01001	-	-	-	HEAT,HEAT_2,Pkinase
BPChr09G12054	1.68216	0.000698216	0.00903392	BPChr09G12054	102107.XP_008224347.1	0.0	1511.1	COG5184@1|root,2QVGP@2759|Eukaryota,37NQ5@33090|Viridiplantae,3GGYF@35493|Streptophyta,4JGA1@91835|fabids	35493|Streptophyta	DZ	Protein present in Fab1, YOTB, Vac1, and EEA1	-	GO:0003674,GO:0005085,GO:0005086,GO:0005488,GO:0005515,GO:0005575,GO:0005622,GO:0005623,GO:0005737,GO:0005794,GO:0005829,GO:0008150,GO:0012505,GO:0016020,GO:0019899,GO:0043226,GO:0043227,GO:0043229,GO:0043231,GO:0044424,GO:0044444,GO:0044464,GO:0051020,GO:0065007,GO:0065009,GO:0098772	-	-	-	-	-	-	-	-	-	-	BRX,BRX_N,FYVE,PH_12,RCC1
BPChr01G17198	1.67997	0.000296538	0.00453111	BPChr01G17198	3760.EMJ28654	2.6e-108	398.7	COG5235@1|root,KOG3108@2759|Eukaryota,37Q34@33090|Viridiplantae,3GCKD@35493|Streptophyta,4JDU3@91835|fabids	35493|Streptophyta	L	Replication protein A 32 kDa subunit	-	GO:0000228,GO:0000278,GO:0005575,GO:0005622,GO:0005623,GO:0005634,GO:0005657,GO:0005662,GO:0005694,GO:0006139,GO:0006259,GO:0006260,GO:0006261,GO:0006269,GO:0006281,GO:0006310,GO:0006725,GO:0006807,GO:0006950,GO:0006974,GO:0007049,GO:0008150,GO:0008152,GO:0009058,GO:0009059,GO:0009892,GO:0009987,GO:0010468,GO:0010605,GO:0010629,GO:0016070,GO:0016458,GO:0018130,GO:0019222,GO:0019438,GO:0022402,GO:…	-	ko:K10739	ko03030,ko03420,ko03430,ko03440,ko03460,map03030,map03420,map03430,map03440,map03460	M00288	-	-	ko00000,ko00001,ko00002,ko03032,ko03400	-	-	-	RPA_C,tRNA_anti-codon
BPChr10G15162	1.67887	0.000649339	0.00851399	BPChr10G15162	3656.XP_008451103.1	2.4e-307	1061.2	COG0270@1|root,2QW29@2759|Eukaryota,37K1J@33090|Viridiplantae,3G8WN@35493|Streptophyta,4JI69@91835|fabids	35493|Streptophyta	B	DNA (cytosine-5)-methyltransferase	-	-	2.1.1.37	ko:K00558	ko00270,ko01100,ko05206,map00270,map01100,map05206	M00035	R04858	RC00003,RC00332	ko00000,ko00001,ko00002,ko01000,ko02048,ko03032,ko03036	-	-	-	BAH,Chromo,DNA_methylase
BPChr06G08613	1.67667	0.00422881	0.0369648	BPChr06G08613	29760.VIT_08s0007g01550.t01	1.4e-269	935.3	COG2132@1|root,KOG1263@2759|Eukaryota,37QQ0@33090|Viridiplantae,3GG7F@35493|Streptophyta	35493|Streptophyta	Q	Belongs to the multicopper oxidase family	-	GO:0000003,GO:0003006,GO:0003674,GO:0003824,GO:0007275,GO:0008150,GO:0008152,GO:0009791,GO:0010035,GO:0010038,GO:0010228,GO:0016491,GO:0016722,GO:0022414,GO:0032501,GO:0032502,GO:0042221,GO:0046688,GO:0048608,GO:0048731,GO:0048856,GO:0050896,GO:0055114,GO:0061458	1.10.3.2	ko:K05909	-	-	-	-	ko00000,ko01000	-	-	-	Cu-oxidase,Cu-oxidase_2,Cu-oxidase_3
BPChr01G05191	1.67585	1.77757e-06	5.61627e-05	BPChr01G05191	3760.EMJ22578	7.7e-68	265.8	COG0666@1|root,KOG0504@2759|Eukaryota,37ZSI@33090|Viridiplantae	2759|Eukaryota	S	Pfam:UBN2_3	-	-	-	-	-	-	-	-	-	-	-	-	Ank_2,DUF4219
BPChr14G27011	1.67361	7.9134e-05	0.00151087	BPChr14G27011	102107.XP_008224807.1	0.0	1252.3	KOG0165@1|root,KOG0165@2759|Eukaryota,37R7M@33090|Viridiplantae,3GGW1@35493|Streptophyta,4JJ08@91835|fabids	35493|Streptophyta	Z	Abnormal spindle-like microcephaly-associated protein homolog	-	-	-	ko:K16743	-	-	-	-	ko00000,ko03036	-	-	-	Arm,CH,IQ
BPChr06G04887	1.67019	0.000117453	0.00208217	BPChr06G04887	3694.POPTR_0016s14320.1	2.2e-57	228.8	KOG0800@1|root,KOG0800@2759|Eukaryota,37Q47@33090|Viridiplantae,3GCXD@35493|Streptophyta,4JTIS@91835|fabids	35493|Streptophyta	O	RING-H2 finger protein	-	GO:0003674,GO:0003824,GO:0004842,GO:0006464,GO:0006508,GO:0006511,GO:0006807,GO:0008150,GO:0008152,GO:0009056,GO:0009057,GO:0009987,GO:0010498,GO:0016567,GO:0016740,GO:0019538,GO:0019787,GO:0019941,GO:0030163,GO:0032446,GO:0036211,GO:0043161,GO:0043170,GO:0043412,GO:0043632,GO:0044237,GO:0044238,GO:0044248,GO:0044257,GO:0044260,GO:0044265,GO:0044267,GO:0051603,GO:0061630,GO:0061659,GO:0070647,GO:…	2.3.2.27	ko:K19040	-	-	-	-	ko00000,ko01000,ko04121	-	-	-	zf-RING_2
BPChr01G22914	1.66699	0.00328348	0.0306432	BPChr01G22914	3694.POPTR_0005s25640.1	1.2e-205	723.8	COG4886@1|root,2QTHE@2759|Eukaryota,37J6I@33090|Viridiplantae,3G7N1@35493|Streptophyta,4JSXS@91835|fabids	35493|Streptophyta	T	LRR receptor-like serine threonine-protein kinase	-	GO:0005575,GO:0005623,GO:0005886,GO:0007275,GO:0008150,GO:0009791,GO:0016020,GO:0032501,GO:0032502,GO:0044464,GO:0048731,GO:0048856,GO:0071944,GO:0090696,GO:0099402	-	-	-	-	-	-	-	-	-	-	LRRNT_2,LRR_1,LRR_4,LRR_6,LRR_8,Pkinase,Pkinase_Tyr
BPChr07G22624	1.65889	0.000210984	0.00339881	BPChr07G22624	102107.XP_008224829.1	5.8e-241	840.5	28N7N@1|root,2QUSZ@2759|Eukaryota,37NXQ@33090|Viridiplantae,3GGR9@35493|Streptophyta,4JE9I@91835|fabids	35493|Streptophyta	-	-	-	-	-	-	-	-	-	-	-	-	-	-	-
BPChr04G24523	1.65534	1.41341e-10	9.99086e-09	BPChr04G24523	29760.VIT_19s0027g00500.t01	4e-107	394.4	COG0012@1|root,KOG1491@2759|Eukaryota,37KV5@33090|Viridiplantae,3GFTS@35493|Streptophyta	35493|Streptophyta	J	Hydrolyzes ATP, and can also hydrolyze GTP with lower efficiency. Has lower affinity for GTP	-	-	-	ko:K19788	-	-	-	-	ko00000,ko03036	-	-	-	MMR_HSR1,YchF-GTPase_C
BPChr08G16209	1.65376	1.53224e-05	0.000374253	BPChr08G16209	57918.XP_004296385.1	2.1e-297	1028.1	COG5409@1|root,KOG1162@2759|Eukaryota,37NVA@33090|Viridiplantae,3G7DP@35493|Streptophyta,4JK3T@91835|fabids	35493|Streptophyta	U	phosphate transporter	-	GO:0000822,GO:0003674,GO:0005215,GO:0005488,GO:0005575,GO:0005622,GO:0005623,GO:0005737,GO:0005794,GO:0005802,GO:0005886,GO:0006082,GO:0006793,GO:0006797,GO:0006799,GO:0006810,GO:0006811,GO:0006817,GO:0006820,GO:0006950,GO:0007154,GO:0007165,GO:0008144,GO:0008150,GO:0008152,GO:0008509,GO:0009058,GO:0009267,GO:0009605,GO:0009987,GO:0009991,GO:0012505,GO:0015075,GO:0015103,GO:0015114,GO:0015318,GO:…	-	-	-	-	-	-	-	-	-	-	EXS,SPX
BPChr14G01866	1.65314	0.000276004	0.00428079	BPChr14G01866	3694.POPTR_0016s14320.1	2.2e-57	228.8	KOG0800@1|root,KOG0800@2759|Eukaryota,37Q47@33090|Viridiplantae,3GCXD@35493|Streptophyta,4JTIS@91835|fabids	35493|Streptophyta	O	RING-H2 finger protein	-	GO:0003674,GO:0003824,GO:0004842,GO:0006464,GO:0006508,GO:0006511,GO:0006807,GO:0008150,GO:0008152,GO:0009056,GO:0009057,GO:0009987,GO:0010498,GO:0016567,GO:0016740,GO:0019538,GO:0019787,GO:0019941,GO:0030163,GO:0032446,GO:0036211,GO:0043161,GO:0043170,GO:0043412,GO:0043632,GO:0044237,GO:0044238,GO:0044248,GO:0044257,GO:0044260,GO:0044265,GO:0044267,GO:0051603,GO:0061630,GO:0061659,GO:0070647,GO:…	2.3.2.27	ko:K19040	-	-	-	-	ko00000,ko01000,ko04121	-	-	-	zf-RING_2
BPChr03G18194	1.65302	7.24726e-06	0.000193605	BPChr03G18194	3847.GLYMA10G42530.2	8.9e-37	159.5	2D6XV@1|root,2S57Y@2759|Eukaryota,37WB4@33090|Viridiplantae,3GJBZ@35493|Streptophyta,4JQIG@91835|fabids	35493|Streptophyta	S	Replication factor A protein 3	-	-	-	ko:K10740	ko03030,ko03420,ko03430,ko03440,ko03460,map03030,map03420,map03430,map03440,map03460	M00288	-	-	ko00000,ko00001,ko00002,ko03032,ko03400	-	-	-	Rep_fac-A_3
BPChr11G07331	1.64161	0.000611749	0.00810246	BPChr11G07331	3641.EOY00358	3e-77	295.0	COG3011@1|root,2RY65@2759|Eukaryota,37TUJ@33090|Viridiplantae,3GIFF@35493|Streptophyta	35493|Streptophyta	S	DCC family protein At1g52590	-	-	-	-	-	-	-	-	-	-	-	-	DUF393
BPChr11G17794	1.64094	5.73584e-08	2.54783e-06	BPChr11G17794	3988.XP_002523956.1	2.2e-175	622.5	2C248@1|root,2QQTB@2759|Eukaryota,37IRJ@33090|Viridiplantae,3GGHG@35493|Streptophyta,4JM79@91835|fabids	35493|Streptophyta	S	KIP1-like protein	-	GO:0005575,GO:0005622,GO:0005623,GO:0005737,GO:0005773,GO:0005774,GO:0016020,GO:0031090,GO:0043226,GO:0043227,GO:0043229,GO:0043231,GO:0044422,GO:0044424,GO:0044437,GO:0044444,GO:0044446,GO:0044464,GO:0098588,GO:0098805	-	ko:K10352	ko04530,map04530	-	-	-	ko00000,ko00001,ko04147,ko04812	-	-	-	KIP1
BPChr11G10124	1.64089	0.00632535	0.0498822	BPChr11G10124	3641.EOX99251	2.3e-168	598.6	COG1236@1|root,KOG1361@2759|Eukaryota,37QA5@33090|Viridiplantae,3GDPM@35493|Streptophyta	35493|Streptophyta	L	5' exonuclease	-	-	-	ko:K15341	-	-	-	-	ko00000,ko01000,ko03400	-	-	-	DRMBL
BPChr06G30493	1.631	0.000107135	0.00193425	BPChr06G30493	102107.XP_008246471.1	1.5e-241	842.4	COG5059@1|root,KOG0239@2759|Eukaryota,37RQN@33090|Viridiplantae,3G7DI@35493|Streptophyta,4JEH7@91835|fabids	35493|Streptophyta	Z	Belongs to the TRAFAC class myosin-kinesin ATPase superfamily. Kinesin family	-	GO:0003674,GO:0003774,GO:0003777,GO:0003824,GO:0005575,GO:0005622,GO:0005623,GO:0005856,GO:0005871,GO:0005875,GO:0006928,GO:0007017,GO:0007018,GO:0008150,GO:0009987,GO:0015630,GO:0016462,GO:0016787,GO:0016817,GO:0016818,GO:0016887,GO:0017111,GO:0032991,GO:0043226,GO:0043228,GO:0043229,GO:0043232,GO:0044422,GO:0044424,GO:0044430,GO:0044446,GO:0044464	-	ko:K10406	-	-	-	-	ko00000,ko04812	-	-	-	Kinesin,Microtub_bd
BPChr06G21280	1.63074	5.44217e-13	5.88988e-11	BPChr06G21280	3641.EOX91117	1.1e-208	732.6	COG2124@1|root,KOG0157@2759|Eukaryota,37QAN@33090|Viridiplantae,3GFY6@35493|Streptophyta	35493|Streptophyta	IQ	cytochrome P450	-	GO:0000902,GO:0001101,GO:0003674,GO:0003824,GO:0004497,GO:0005575,GO:0005622,GO:0005623,GO:0005737,GO:0005783,GO:0006629,GO:0006694,GO:0007154,GO:0007165,GO:0007275,GO:0008150,GO:0008152,GO:0008202,GO:0008395,GO:0008610,GO:0009058,GO:0009653,GO:0009719,GO:0009725,GO:0009741,GO:0009753,GO:0009755,GO:0009826,GO:0009867,GO:0009965,GO:0009987,GO:0010012,GO:0010016,GO:0010033,GO:0010268,GO:0010358,GO:…	-	ko:K09587	ko00905,ko01100,ko01110,map00905,map01100,map01110	M00371	R07430,R07445,R07452,R07453,R07454	RC00773	ko00000,ko00001,ko00002,ko00199,ko01000	-	-	-	p450
BPChr03G18569	1.63056	5.17332e-08	2.3137e-06	BPChr03G18569	29730.Gorai.001G235500.1	5.9e-168	597.0	COG3240@1|root,2QQP0@2759|Eukaryota,37KD4@33090|Viridiplantae,3GHJ0@35493|Streptophyta	35493|Streptophyta	I	Belongs to the 'GDSL' lipolytic enzyme family	-	-	-	-	-	-	-	-	-	-	-	-	Lipase_GDSL
BPChr09G29792	1.62852	0.00412804	0.036262	BPChr09G29792	3694.POPTR_0007s15320.1	4.2e-51	209.5	COG5648@1|root,KOG0381@2759|Eukaryota,37UGQ@33090|Viridiplantae,3GIEH@35493|Streptophyta,4JP0J@91835|fabids	35493|Streptophyta	K	High mobility group B protein	-	GO:0000741,GO:0003674,GO:0003676,GO:0003677,GO:0003700,GO:0005488,GO:0005575,GO:0005622,GO:0005623,GO:0005634,GO:0006355,GO:0006996,GO:0006997,GO:0007275,GO:0008150,GO:0009553,GO:0009559,GO:0009561,GO:0009889,GO:0009987,GO:0010197,GO:0010468,GO:0010556,GO:0016043,GO:0019219,GO:0019222,GO:0030154,GO:0031323,GO:0031326,GO:0032501,GO:0032502,GO:0043226,GO:0043227,GO:0043229,GO:0043231,GO:0044424,GO:…	-	ko:K10802,ko:K11296	ko03410,ko04140,ko04217,map03410,map04140,map04217	-	-	-	ko00000,ko00001,ko03036,ko03400,ko04147	-	-	-	HMG_box
BPChr07G30069	1.62256	0.00512518	0.0425051	BPChr07G30069	3760.EMJ14907	0.0	1114.4	KOG2177@1|root,KOG4362@1|root,KOG2177@2759|Eukaryota,KOG4362@2759|Eukaryota,37J3W@33090|Viridiplantae,3G75Y@35493|Streptophyta,4JF1N@91835|fabids	35493|Streptophyta	L	Protein BREAST CANCER SUSCEPTIBILITY 1 homolog	-	GO:0000151,GO:0000152,GO:0000724,GO:0000725,GO:0003674,GO:0003824,GO:0004842,GO:0005575,GO:0005622,GO:0005623,GO:0005634,GO:0005886,GO:0006139,GO:0006259,GO:0006281,GO:0006302,GO:0006310,GO:0006355,GO:0006357,GO:0006464,GO:0006725,GO:0006807,GO:0006950,GO:0006974,GO:0008150,GO:0008152,GO:0009314,GO:0009628,GO:0009889,GO:0009890,GO:0009891,GO:0009892,GO:0009893,GO:0009987,GO:0010212,GO:0010332,GO:…	-	ko:K10683	ko03440,map03440	-	-	-	ko00000,ko00001,ko03019,ko03036,ko04121	-	-	-	BRCT,BRCT_2,DYW_deaminase,PPR,zf-C3HC4_2,zf-HC5HC2H,zf-RING_2
BPChr04G24489	1.62223	7.08763e-07	2.51977e-05	BPChr04G24489	2711.XP_006481238.1	9.1e-288	995.7	2CMTH@1|root,2QRW3@2759|Eukaryota,37Q3C@33090|Viridiplantae,3GDC9@35493|Streptophyta	35493|Streptophyta	S	Belongs to the NPH3 family	-	-	-	-	-	-	-	-	-	-	-	-	BTB,NPH3
BPChr08G15422	1.6219	7.81091e-25	2.18583e-22	BPChr08G15422	3988.XP_002518612.1	0.0	1634.0	COG0574@1|root,2QS3J@2759|Eukaryota,37PTN@33090|Viridiplantae,3GF5X@35493|Streptophyta,4JHVP@91835|fabids	35493|Streptophyta	G	Phosphoglucan, water dikinase	-	GO:0000272,GO:0003674,GO:0003824,GO:0005575,GO:0005622,GO:0005623,GO:0005737,GO:0005975,GO:0005976,GO:0005982,GO:0005983,GO:0006073,GO:0006464,GO:0006468,GO:0006793,GO:0006796,GO:0006807,GO:0008150,GO:0008152,GO:0009056,GO:0009057,GO:0009251,GO:0009507,GO:0009532,GO:0009536,GO:0009570,GO:0009987,GO:0016052,GO:0016301,GO:0016310,GO:0016740,GO:0016772,GO:0016781,GO:0019200,GO:0019538,GO:0036211,GO:…	2.7.9.5	ko:K15535	-	-	-	-	ko00000,ko01000	-	-	-	CBM_20,PPDK_N
BPChr14G27058	1.62019	0.0038158	0.0341504	BPChr14G27058	3760.EMJ15746	0.0	1491.1	COG1877@1|root,KOG1050@2759|Eukaryota,37MHJ@33090|Viridiplantae,3G81Y@35493|Streptophyta,4JKYD@91835|fabids	35493|Streptophyta	G	Alpha,alpha-trehalose-phosphate synthase UDP-forming 1-like	-	GO:0000003,GO:0003006,GO:0003674,GO:0003824,GO:0003825,GO:0005975,GO:0005984,GO:0005991,GO:0005992,GO:0006793,GO:0006796,GO:0006950,GO:0007154,GO:0007165,GO:0007275,GO:0008150,GO:0008152,GO:0008194,GO:0009058,GO:0009311,GO:0009312,GO:0009743,GO:0009756,GO:0009790,GO:0009791,GO:0009793,GO:0009832,GO:0009987,GO:0010033,GO:0010154,GO:0010182,GO:0016051,GO:0016311,GO:0016740,GO:0016757,GO:0016758,GO:…	2.4.1.15,3.1.3.12	ko:K16055	ko00500,ko01100,map00500,map01100	-	R02737,R02778	RC00005,RC00017,RC00049,RC02748	ko00000,ko00001,ko01000,ko01003	-	GT20	-	Glyco_transf_20,Trehalose_PPase
BPChr11G18470	1.61076	0.00023525	0.00373747	BPChr11G18470	3760.EMJ22578	7.7e-68	265.8	COG0666@1|root,KOG0504@2759|Eukaryota,37ZSI@33090|Viridiplantae	2759|Eukaryota	S	Pfam:UBN2_3	-	-	-	-	-	-	-	-	-	-	-	-	Ank_2,DUF4219
BPChr09G20935	1.60897	2.18397e-07	8.73096e-06	BPChr09G20935	981085.XP_010088679.1	6.2e-90	337.0	COG0580@1|root,KOG0223@2759|Eukaryota,37KFM@33090|Viridiplantae,3GFE2@35493|Streptophyta,4JTEC@91835|fabids	35493|Streptophyta	G	Belongs to the MIP aquaporin (TC 1.A.8) family	-	GO:0001101,GO:0003674,GO:0005215,GO:0005372,GO:0005575,GO:0005623,GO:0005886,GO:0005887,GO:0006810,GO:0006811,GO:0006833,GO:0006950,GO:0008150,GO:0009414,GO:0009415,GO:0009628,GO:0010035,GO:0015250,GO:0015267,GO:0015318,GO:0016020,GO:0016021,GO:0022803,GO:0022838,GO:0022857,GO:0031224,GO:0031226,GO:0034220,GO:0042044,GO:0042221,GO:0044425,GO:0044459,GO:0044464,GO:0050896,GO:0051179,GO:0051234,GO:…	-	ko:K09866	ko04962,ko04976,map04962,map04976	-	-	-	ko00000,ko00001,ko02000	1.A.8	-	-	MIP
BPunChr33000	1.60431	4.5047e-06	0.000127518	BPunChr33000	2711.XP_006470794.1	6.6e-120	436.8	28K4N@1|root,2QSJ8@2759|Eukaryota,37SDJ@33090|Viridiplantae,3GDKF@35493|Streptophyta	35493|Streptophyta	S	PCTP-like protein	-	-	-	-	-	-	-	-	-	-	-	-	START
BPChr06G30420	1.60337	0.000722007	0.00926828	BPChr06G30420	981085.XP_010108371.1	8.1e-39	166.8	2BJ9Y@1|root,2S1FS@2759|Eukaryota,37VMY@33090|Viridiplantae,3GJNC@35493|Streptophyta,4JQCI@91835|fabids	35493|Streptophyta	S	expressed protein	-	-	-	-	-	-	-	-	-	-	-	-	-
BPChr12G11460	1.60296	3.08918e-08	1.45117e-06	BPChr12G11460	3760.EMJ25733	3e-116	425.2	COG3621@1|root,KOG0513@2759|Eukaryota,37JKH@33090|Viridiplantae,3G7E9@35493|Streptophyta,4JVUE@91835|fabids	35493|Streptophyta	I	Lipolytic acyl hydrolase (LAH)	-	-	-	-	-	-	-	-	-	-	-	-	Patatin
BPChr07G22643	1.59742	1.88725e-06	5.93407e-05	BPChr07G22643	102107.XP_008224807.1	0.0	1350.1	KOG0165@1|root,KOG0165@2759|Eukaryota,37R7M@33090|Viridiplantae,3GGW1@35493|Streptophyta,4JJ08@91835|fabids	35493|Streptophyta	Z	Abnormal spindle-like microcephaly-associated protein homolog	-	-	-	ko:K16743	-	-	-	-	ko00000,ko03036	-	-	-	Arm,CH,IQ
BPunChr32694	1.59544	0.00575669	0.0461974	BPunChr32694	3641.EOX99722	2.1e-171	609.0	COG0402@1|root,KOG3968@2759|Eukaryota,37RVI@33090|Viridiplantae,3GFQR@35493|Streptophyta	35493|Streptophyta	FQ	5-methylthioadenosine S-adenosylhomocysteine	-	-	-	-	-	-	-	-	-	-	-	-	Amidohydro_1
BPChr04G03667	1.59217	0.00391142	0.0348435	BPChr04G03667	3641.EOY21727	3.1e-29	135.6	COG0071@1|root,KOG0710@2759|Eukaryota,37VN7@33090|Viridiplantae,3GKHE@35493|Streptophyta	35493|Streptophyta	O	Belongs to the small heat shock protein (HSP20) family	-	-	-	-	-	-	-	-	-	-	-	-	HSP20
BPChr10G19368	1.59159	1.89992e-19	3.44607e-17	BPChr10G19368	29760.VIT_06s0080g00890.t01	2.1e-42	181.0	28YVZ@1|root,2R5Q5@2759|Eukaryota,37KX9@33090|Viridiplantae,3GAJM@35493|Streptophyta	35493|Streptophyta	-	-	-	-	-	-	-	-	-	-	-	-	-	-	-
BPChr06G25253	1.58932	0.00481646	0.0407206	BPChr06G25253	2711.XP_006493473.1	3.7e-55	223.0	COG0515@1|root,2QUB0@2759|Eukaryota,37RT6@33090|Viridiplantae,3GCEX@35493|Streptophyta	35493|Streptophyta	T	Belongs to the protein kinase superfamily. Ser Thr protein kinase family	-	-	2.7.11.1	ko:K04730	ko04010,ko04064,ko04620,ko04624,ko04722,ko05133,ko05140,ko05142,ko05145,ko05152,ko05162,ko05169,map04010,map04064,map04620,map04624,map04722,map05133,map05140,map05142,map05145,map05152,map05162,map05169	M00686	-	-	ko00000,ko00001,ko00002,ko01000,ko01001	-	-	-	LRRNT_2,LRR_1,LRR_6,LRR_8,Pkinase
BPChr02G23381	1.58836	8.33371e-05	0.00157424	BPChr02G23381	57918.XP_004301634.1	5.4e-279	966.8	COG3440@1|root,2QSQ8@2759|Eukaryota,37HRK@33090|Viridiplantae,3GH17@35493|Streptophyta,4JDAC@91835|fabids	35493|Streptophyta	K	E3 ubiquitin-protein ligase ORTHRUS	-	GO:0000166,GO:0000228,GO:0000785,GO:0000790,GO:0000792,GO:0003674,GO:0003676,GO:0003677,GO:0003682,GO:0003690,GO:0003824,GO:0004842,GO:0005488,GO:0005515,GO:0005575,GO:0005622,GO:0005623,GO:0005634,GO:0005694,GO:0005720,GO:0005737,GO:0006139,GO:0006259,GO:0006304,GO:0006305,GO:0006306,GO:0006323,GO:0006325,GO:0006333,GO:0006338,GO:0006355,GO:0006464,GO:0006725,GO:0006807,GO:0006996,GO:0008150,GO:…	2.3.2.27	ko:K10638	-	-	-	-	ko00000,ko01000,ko03036,ko04121	-	-	-	SAD_SRA,zf-C3HC4,zf-C3HC4_3,zf-RING_UBOX
BPChr07G17349	1.58576	4.97065e-07	1.83371e-05	BPChr07G17349	3983.cassava4.1_012524m	1.9e-131	475.7	28MV1@1|root,2QUDA@2759|Eukaryota,37N1M@33090|Viridiplantae,3G7J6@35493|Streptophyta,4JNP1@91835|fabids	35493|Streptophyta	S	Protein of unknown function (DUF561)	-	-	-	-	-	-	-	-	-	-	-	-	DUF561
BPChr01G19547	1.58552	0.00502258	0.041867	BPChr01G19547	3694.POPTR_0279s00200.1	1.5e-133	482.6	28MM2@1|root,2QU4V@2759|Eukaryota,37SA9@33090|Viridiplantae,3GA00@35493|Streptophyta,4JRRB@91835|fabids	35493|Streptophyta	S	NmrA-like family	-	-	-	-	-	-	-	-	-	-	-	-	NmrA
BPChr06G31257	1.57851	0.00128092	0.0146971	BPChr06G31257	3641.EOY17851	1.9e-253	881.7	COG0147@1|root,KOG1223@2759|Eukaryota,37PW6@33090|Viridiplantae,3GEFS@35493|Streptophyta	35493|Streptophyta	E	Anthranilate synthase alpha subunit 1	ASA1	GO:0000162,GO:0003674,GO:0003824,GO:0004049,GO:0005575,GO:0005622,GO:0005623,GO:0005737,GO:0005950,GO:0006082,GO:0006520,GO:0006568,GO:0006576,GO:0006586,GO:0006725,GO:0006807,GO:0008150,GO:0008152,GO:0008652,GO:0009058,GO:0009072,GO:0009073,GO:0009308,GO:0009309,GO:0009889,GO:0009987,GO:0010600,GO:0010817,GO:0016053,GO:0016829,GO:0016830,GO:0016833,GO:0018130,GO:0019222,GO:0019438,GO:0019752,GO:…	4.1.3.27	ko:K01657	ko00400,ko00405,ko01100,ko01110,ko01130,ko01230,ko02024,ko02025,map00400,map00405,map01100,map01110,map01130,map01230,map02024,map02025	M00023	R00985,R00986	RC00010,RC02148,RC02414	ko00000,ko00001,ko00002,ko01000	-	-	-	Anth_synt_I_N,Chorismate_bind
BPChr09G12086	1.57482	0.0010821	0.0128165	BPChr09G12086	3694.POPTR_0010s08170.1	1.4e-89	335.9	KOG0406@1|root,KOG0406@2759|Eukaryota,37T5N@33090|Viridiplantae,3GEHR@35493|Streptophyta,4JSXR@91835|fabids	35493|Streptophyta	O	Belongs to the GST superfamily	-	-	2.5.1.18	ko:K00799	ko00480,ko00980,ko00982,ko00983,ko01524,ko05200,ko05204,ko05225,ko05418,map00480,map00980,map00982,map00983,map01524,map05200,map05204,map05225,map05418	-	R03522,R07002,R07003,R07004,R07023,R07024,R07025,R07026,R07069,R07070,R07083,R07084,R07091,R07092,R07093,R07094,R07100,R07113,R07116,R08280,R09409,R11905	RC00004,RC00069,RC00840,RC00948,RC01704,RC01705,RC01706,RC01758,RC01759,RC01765,RC01767,RC01769,RC02243,RC02527,RC02939,RC02940,RC02942,RC02943,RC02944	ko00000,ko00001,ko01000,ko02000	1.A.12.2.2,1.A.12.3.2	-	-	GST_C,GST_N
BPChr12G25802	1.56649	7.01059e-05	0.00137331	BPChr12G25802	65489.OBART01G08360.1	9.3e-255	886.7	COG5024@1|root,KOG0654@2759|Eukaryota,37QNA@33090|Viridiplantae,3GFDJ@35493|Streptophyta,3KP6H@4447|Liliopsida,3IDYW@38820|Poales	35493|Streptophyta	D	Belongs to the cyclin family	-	GO:0000003,GO:0000280,GO:0003006,GO:0005575,GO:0005622,GO:0005623,GO:0005634,GO:0005737,GO:0006996,GO:0007049,GO:0007135,GO:0007140,GO:0007275,GO:0007276,GO:0008150,GO:0009555,GO:0009556,GO:0009987,GO:0016043,GO:0019953,GO:0022402,GO:0022412,GO:0022414,GO:0032501,GO:0032502,GO:0032504,GO:0034293,GO:0043226,GO:0043227,GO:0043229,GO:0043231,GO:0043934,GO:0044424,GO:0044464,GO:0044703,GO:0048229,GO:…	-	ko:K06627	ko04110,ko04152,ko04218,ko04914,ko05161,ko05165,ko05169,ko05203,map04110,map04152,map04218,map04914,map05161,map05165,map05169,map05203	M00693	-	-	ko00000,ko00001,ko00002,ko03032,ko03036	-	-	-	Cyclin_C,Cyclin_N
BPChr10G03288	1.56505	0.00228203	0.0231861	BPChr10G03288	8479.XP_005311290.1	1.3e-12	79.7	COG2036@1|root,KOG3467@2759|Eukaryota	2759|Eukaryota	B	protein heterodimerization activity	-	-	-	ko:K11254	ko05034,ko05203,ko05322,map05034,map05203,map05322	-	-	-	ko00000,ko00001,ko03036	-	-	-	CENP-T_C,TAF
BPChr04G03692	1.55736	0.00339889	0.0314716	BPChr04G03692	2711.XP_006476661.1	3.9e-244	850.9	COG0515@1|root,2QTGH@2759|Eukaryota,37RTM@33090|Viridiplantae,3GGCA@35493|Streptophyta	35493|Streptophyta	T	Belongs to the protein kinase superfamily. Ser Thr protein kinase family	-	-	-	-	-	-	-	-	-	-	-	-	LRRNT_2,LRR_1,LRR_8,Pkinase
BPChr13G04462	1.55587	1.49555e-10	1.0463e-08	BPChr13G04462	29760.VIT_13s0064g00440.t01	4.4e-112	411.0	COG0500@1|root,KOG1269@2759|Eukaryota,37NU9@33090|Viridiplantae,3GG6H@35493|Streptophyta	35493|Streptophyta	I	Belongs to the class I-like SAM-binding methyltransferase superfamily. Erg6 SMT family	-	GO:0000003,GO:0003006,GO:0003674,GO:0003824,GO:0003838,GO:0005575,GO:0005622,GO:0005623,GO:0005737,GO:0005773,GO:0005783,GO:0005911,GO:0006629,GO:0006694,GO:0007275,GO:0008150,GO:0008152,GO:0008168,GO:0008169,GO:0008202,GO:0008610,GO:0008757,GO:0009058,GO:0009506,GO:0009790,GO:0009791,GO:0009793,GO:0010154,GO:0012505,GO:0016125,GO:0016126,GO:0016740,GO:0016741,GO:0022414,GO:0030054,GO:0032259,GO:…	2.1.1.41	ko:K00559	ko00100,ko01100,ko01110,ko01130,map00100,map01100,map01110,map01130	M00102	R04427,R07481	RC00003,RC01154	ko00000,ko00001,ko00002,ko01000	-	-	-	CMAS,Methyltransf_11,Sterol_MT_C
BPChr03G11645	1.55147	9.74292e-05	0.00178702	BPChr03G11645	4432.XP_010270272.1	1.9e-238	831.6	COG0814@1|root,KOG1303@2759|Eukaryota,37JD4@33090|Viridiplantae,3G8H9@35493|Streptophyta	35493|Streptophyta	E	Amino acid permease	AAP3	GO:0003333,GO:0003674,GO:0005215,GO:0005342,GO:0005575,GO:0005623,GO:0005886,GO:0006810,GO:0006811,GO:0006812,GO:0006820,GO:0006865,GO:0008150,GO:0008509,GO:0008514,GO:0015075,GO:0015171,GO:0015174,GO:0015318,GO:0015711,GO:0015802,GO:0015809,GO:0015849,GO:0016020,GO:0022857,GO:0034220,GO:0044464,GO:0046942,GO:0046943,GO:0051179,GO:0051234,GO:0055085,GO:0071702,GO:0071705,GO:0071944,GO:0098656,GO:…	-	-	-	-	-	-	-	-	-	-	Aa_trans
BPChr06G31087	1.55023	0.00020214	0.0032725	BPChr06G31087	102107.XP_008246471.1	2.4e-266	924.9	COG5059@1|root,KOG0239@2759|Eukaryota,37RQN@33090|Viridiplantae,3G7DI@35493|Streptophyta,4JEH7@91835|fabids	35493|Streptophyta	Z	Belongs to the TRAFAC class myosin-kinesin ATPase superfamily. Kinesin family	-	GO:0003674,GO:0003774,GO:0003777,GO:0003824,GO:0005575,GO:0005622,GO:0005623,GO:0005856,GO:0005871,GO:0005875,GO:0006928,GO:0007017,GO:0007018,GO:0008150,GO:0009987,GO:0015630,GO:0016462,GO:0016787,GO:0016817,GO:0016818,GO:0016887,GO:0017111,GO:0032991,GO:0043226,GO:0043228,GO:0043229,GO:0043232,GO:0044422,GO:0044424,GO:0044430,GO:0044446,GO:0044464	-	ko:K10406	-	-	-	-	ko00000,ko04812	-	-	-	Kinesin,Microtub_bd
BPChr11G18780	1.54965	0.00118772	0.0138408	BPChr11G18780	57918.XP_004289566.1	0.0	1376.7	COG0438@1|root,KOG0853@2759|Eukaryota,37J9F@33090|Viridiplantae,3G79M@35493|Streptophyta,4JI73@91835|fabids	35493|Streptophyta	M	Sucrose-cleaving enzyme that provides UDP-glucose and fructose for various metabolic pathways	-	GO:0003674,GO:0003824,GO:0005575,GO:0005618,GO:0005623,GO:0008150,GO:0008194,GO:0016157,GO:0016740,GO:0016757,GO:0016758,GO:0030312,GO:0033036,GO:0033037,GO:0035251,GO:0044464,GO:0046527,GO:0051179,GO:0052545,GO:0071944,GO:0080165	2.4.1.13	ko:K00695	ko00500,ko01100,map00500,map01100	-	R00806	RC00005,RC00028,RC02748	ko00000,ko00001,ko01000,ko01003	-	GT4	-	Glycos_transf_1,Sucrose_synth
BPChr08G19106	1.54435	8.91872e-05	0.00165915	BPChr08G19106	29760.VIT_05s0051g00580.t01	1.8e-54	218.4	COG0127@1|root,KOG3222@2759|Eukaryota,37PRW@33090|Viridiplantae,3GACP@35493|Streptophyta	35493|Streptophyta	F	Pyrophosphatase that hydrolyzes non-canonical purine nucleotides such as inosine triphosphate (ITP), deoxyinosine triphosphate (dITP) or xanthosine 5'-triphosphate (XTP) to their respective monophosphate derivatives. The enzyme does not distinguish between the deoxy- and ribose forms. Probably excludes non-canonical purines from RNA and DNA precursor pools, thus preventing their incorporation int…	-	GO:0003674,GO:0003824,GO:0005575,GO:0005622,GO:0005623,GO:0005737,GO:0006139,GO:0006725,GO:0006753,GO:0006793,GO:0006796,GO:0006807,GO:0008150,GO:0008152,GO:0009056,GO:0009058,GO:0009141,GO:0009143,GO:0009987,GO:0016462,GO:0016787,GO:0016817,GO:0016818,GO:0018130,GO:0019438,GO:0019439,GO:0019637,GO:0034404,GO:0034641,GO:0034654,GO:0034655,GO:0044237,GO:0044238,GO:0044248,GO:0044249,GO:0044270,GO:…	-	ko:K01519	ko00230,ko00983,ko01100,map00230,map00983,map01100	-	R00426,R00720,R01855,R02100,R02720,R03531,R08243	RC00002	ko00000,ko00001,ko01000	-	-	-	Ham1p_like
BPChr13G04475	1.54003	0.00016425	0.0027453	BPChr13G04475	981085.XP_010088208.1	4.2e-27	127.5	2E076@1|root,2S7NN@2759|Eukaryota,37X5D@33090|Viridiplantae,3GKYD@35493|Streptophyta,4JR55@91835|fabids	35493|Streptophyta	-	-	-	-	-	-	-	-	-	-	-	-	-	-	-
BPChr13G23016	1.5336	0.000112018	0.00200212	BPChr13G23016	218851.Aquca_030_00165.1	2.7e-22	111.7	COG0580@1|root,KOG0223@2759|Eukaryota,37I73@33090|Viridiplantae,3G7V9@35493|Streptophyta	35493|Streptophyta	G	Belongs to the MIP aquaporin (TC 1.A.8) family	-	-	-	ko:K09872	-	-	-	-	ko00000,ko02000	1.A.8,1.A.8.11	-	-	MIP
BPChr05G31718	1.53293	1.88671e-11	1.53995e-09	BPChr05G31718	3641.EOY11110	2.4e-267	927.9	KOG0589@1|root,KOG0589@2759|Eukaryota,37HWZ@33090|Viridiplantae,3G7J2@35493|Streptophyta	35493|Streptophyta	T	serine threonine-protein kinase	NEK1	-	2.7.11.1	ko:K08857	-	-	-	-	ko00000,ko01000,ko01001,ko03036,ko03400	-	-	-	Pkinase
BPChr08G05091	1.53091	1.49797e-05	0.000368178	BPChr08G05091	29730.Gorai.005G043200.1	2.1e-95	355.5	2CMAE@1|root,2QPSX@2759|Eukaryota,37K48@33090|Viridiplantae,3GAIC@35493|Streptophyta	35493|Streptophyta	S	late embryogenesis abundant protein	-	GO:0005575,GO:0005622,GO:0005623,GO:0005634,GO:0005730,GO:0005737,GO:0005829,GO:0006873,GO:0007275,GO:0008150,GO:0009791,GO:0009845,GO:0009987,GO:0010035,GO:0010038,GO:0010226,GO:0019725,GO:0031974,GO:0031981,GO:0032501,GO:0032502,GO:0042221,GO:0042592,GO:0043226,GO:0043227,GO:0043228,GO:0043229,GO:0043231,GO:0043232,GO:0043233,GO:0044422,GO:0044424,GO:0044428,GO:0044444,GO:0044446,GO:0044464,GO:…	-	-	-	-	-	-	-	-	-	-	SMP
BPChr08G13361	1.52563	0.000414063	0.00594218	BPChr08G13361	102107.XP_008224347.1	0.0	1511.1	COG5184@1|root,2QVGP@2759|Eukaryota,37NQ5@33090|Viridiplantae,3GGYF@35493|Streptophyta,4JGA1@91835|fabids	35493|Streptophyta	DZ	Protein present in Fab1, YOTB, Vac1, and EEA1	-	GO:0003674,GO:0005085,GO:0005086,GO:0005488,GO:0005515,GO:0005575,GO:0005622,GO:0005623,GO:0005737,GO:0005794,GO:0005829,GO:0008150,GO:0012505,GO:0016020,GO:0019899,GO:0043226,GO:0043227,GO:0043229,GO:0043231,GO:0044424,GO:0044444,GO:0044464,GO:0051020,GO:0065007,GO:0065009,GO:0098772	-	-	-	-	-	-	-	-	-	-	BRX,BRX_N,FYVE,PH_12,RCC1
BPChr08G16290	1.52529	0.0010202	0.0122365	BPChr08G16290	3847.GLYMA01G37920.1	2.8e-299	1033.9	COG2132@1|root,KOG1263@2759|Eukaryota,37KUQ@33090|Viridiplantae,3GCUA@35493|Streptophyta,4JFDN@91835|fabids	35493|Streptophyta	Q	Lignin degradation and detoxification of lignin-derived products	-	-	1.10.3.2	ko:K05909	-	-	-	-	ko00000,ko01000	-	-	-	Cu-oxidase,Cu-oxidase_2,Cu-oxidase_3
BPChr06G30969	1.52041	0.000134487	0.002315	BPChr06G30969	3641.EOY17851	1.9e-253	881.7	COG0147@1|root,KOG1223@2759|Eukaryota,37PW6@33090|Viridiplantae,3GEFS@35493|Streptophyta	35493|Streptophyta	E	Anthranilate synthase alpha subunit 1	ASA1	GO:0000162,GO:0003674,GO:0003824,GO:0004049,GO:0005575,GO:0005622,GO:0005623,GO:0005737,GO:0005950,GO:0006082,GO:0006520,GO:0006568,GO:0006576,GO:0006586,GO:0006725,GO:0006807,GO:0008150,GO:0008152,GO:0008652,GO:0009058,GO:0009072,GO:0009073,GO:0009308,GO:0009309,GO:0009889,GO:0009987,GO:0010600,GO:0010817,GO:0016053,GO:0016829,GO:0016830,GO:0016833,GO:0018130,GO:0019222,GO:0019438,GO:0019752,GO:…	4.1.3.27	ko:K01657	ko00400,ko00405,ko01100,ko01110,ko01130,ko01230,ko02024,ko02025,map00400,map00405,map01100,map01110,map01130,map01230,map02024,map02025	M00023	R00985,R00986	RC00010,RC02148,RC02414	ko00000,ko00001,ko00002,ko01000	-	-	-	Anth_synt_I_N,Chorismate_bind
BPChr01G22950	1.52018	0.00158047	0.0174422	BPChr01G22950	3694.POPTR_0005s25640.1	1.3e-205	723.8	COG4886@1|root,2QTHE@2759|Eukaryota,37J6I@33090|Viridiplantae,3G7N1@35493|Streptophyta,4JSXS@91835|fabids	35493|Streptophyta	T	LRR receptor-like serine threonine-protein kinase	-	GO:0005575,GO:0005623,GO:0005886,GO:0007275,GO:0008150,GO:0009791,GO:0016020,GO:0032501,GO:0032502,GO:0044464,GO:0048731,GO:0048856,GO:0071944,GO:0090696,GO:0099402	-	-	-	-	-	-	-	-	-	-	LRRNT_2,LRR_1,LRR_4,LRR_6,LRR_8,Pkinase,Pkinase_Tyr
BPChr08G04982	1.51787	0.00236931	0.0238257	BPChr08G04982	3847.GLYMA07G38485.1	2.9e-61	241.5	29T1F@1|root,2RY1F@2759|Eukaryota,37UWZ@33090|Viridiplantae,3GIGJ@35493|Streptophyta,4JP47@91835|fabids	35493|Streptophyta	S	AWPM-19-like family	-	-	-	-	-	-	-	-	-	-	-	-	AWPM-19
BPChr11G05665	1.51563	2.06557e-06	6.44305e-05	BPChr11G05665	4432.XP_010258384.1	2.7e-98	365.2	KOG1508@1|root,KOG1508@2759|Eukaryota,37MTJ@33090|Viridiplantae,3GACK@35493|Streptophyta	35493|Streptophyta	L	Belongs to the nucleosome assembly protein (NAP) family	-	GO:0000724,GO:0000725,GO:0003674,GO:0005488,GO:0005515,GO:0005575,GO:0005622,GO:0005623,GO:0005634,GO:0005737,GO:0005829,GO:0006139,GO:0006259,GO:0006281,GO:0006302,GO:0006310,GO:0006725,GO:0006807,GO:0006950,GO:0006974,GO:0008150,GO:0008152,GO:0009987,GO:0010035,GO:0010038,GO:0016444,GO:0033554,GO:0034641,GO:0042221,GO:0042393,GO:0043170,GO:0043226,GO:0043227,GO:0043229,GO:0043231,GO:0044237,GO:…	-	ko:K11290	-	-	-	-	ko00000,ko03036	-	-	-	NAP
BPChr06G08040	1.50997	0.00114265	0.0134435	BPChr06G08040	3649.evm.model.supercontig_23.81	3.3e-36	160.2	KOG1171@1|root,KOG1171@2759|Eukaryota,37NS8@33090|Viridiplantae,3GBJB@35493|Streptophyta	35493|Streptophyta	P	tesmin TSO1-like CXC	-	GO:0003674,GO:0003700,GO:0006355,GO:0008150,GO:0009889,GO:0010468,GO:0010556,GO:0019219,GO:0019222,GO:0031323,GO:0031326,GO:0050789,GO:0050794,GO:0051171,GO:0051252,GO:0060255,GO:0065007,GO:0080090,GO:0140110,GO:1903506,GO:2000112,GO:2001141	-	ko:K21776	ko04218,map04218	-	-	-	ko00000,ko00001	-	-	-	TCR
BPChr04G27256	1.50654	7.4584e-06	0.000197703	BPChr04G27256	29760.VIT_18s0001g07400.t01	8.8e-101	373.6	COG0288@1|root,KOG1578@2759|Eukaryota,37PFN@33090|Viridiplantae,3GG3U@35493|Streptophyta	35493|Streptophyta	P	Reversible hydration of carbon dioxide	-	GO:0005575,GO:0005622,GO:0005623,GO:0005737,GO:0005739,GO:0043226,GO:0043227,GO:0043229,GO:0043231,GO:0044424,GO:0044444,GO:0044464	4.2.1.1	ko:K01673	ko00910,map00910	-	R00132,R10092	RC02807	ko00000,ko00001,ko01000	-	-	-	Pro_CA
BPChr12G25380	1.50613	0.000193424	0.00315486	BPChr12G25380	3641.EOY31261	2.5e-34	151.4	2CYVA@1|root,2S6MW@2759|Eukaryota,37WZ7@33090|Viridiplantae,3GM6R@35493|Streptophyta	35493|Streptophyta	-	-	-	-	-	-	-	-	-	-	-	-	-	-	-
BPChr11G17978	1.50056	0.00321122	0.0300979	BPChr11G17978	981085.XP_010109558.1	3.9e-176	624.8	28MUD@1|root,2QUH3@2759|Eukaryota,37M76@33090|Viridiplantae,3G7DK@35493|Streptophyta,4JMQ4@91835|fabids	35493|Streptophyta	S	synthase	-	-	3.1.7.11,4.2.3.108,4.2.3.27,4.2.3.46	ko:K07385,ko:K12742,ko:K14173,ko:K20979	ko00900,ko00902,ko00909,ko01100,ko01110,ko01130,map00900,map00902,map00909,map01100,map01110,map01130	-	R06421,R06422,R08199,R08396,R08696	RC00017,RC00637,RC01512,RC02338,RC02773	ko00000,ko00001,ko01000	-	-	-	Terpene_synth,Terpene_synth_C
BPChr06G30376	1.49649	0.000332994	0.00496961	BPChr06G30376	3750.XP_008388544.1	3.8e-54	218.0	COG5262@1|root,KOG1756@2759|Eukaryota,37TUU@33090|Viridiplantae,3GIXS@35493|Streptophyta,4JPX9@91835|fabids	35493|Streptophyta	B	Histone H2A	-	GO:0000228,GO:0000785,GO:0000790,GO:0000792,GO:0003674,GO:0003676,GO:0003677,GO:0003682,GO:0005488,GO:0005575,GO:0005622,GO:0005623,GO:0005634,GO:0005694,GO:0005730,GO:0006325,GO:0006342,GO:0006355,GO:0006996,GO:0008150,GO:0009889,GO:0009890,GO:0009892,GO:0009987,GO:0010468,GO:0010556,GO:0010558,GO:0010605,GO:0010629,GO:0016043,GO:0016458,GO:0019219,GO:0019222,GO:0031323,GO:0031324,GO:0031326,GO:…	-	ko:K11251	ko04217,ko05034,ko05322,map04217,map05034,map05322	-	-	-	ko00000,ko00001,ko03036,ko04147	-	-	-	Histone,Histone_H2A_C
BPChr11G12210	1.49464	3.64167e-07	1.38249e-05	BPChr11G12210	29760.VIT_14s0068g01200.t01	1.2e-201	709.5	28I79@1|root,2QQ2A@2759|Eukaryota,37RTU@33090|Viridiplantae,3G8T1@35493|Streptophyta	35493|Streptophyta	K	Transcription factor	-	GO:0003674,GO:0003676,GO:0003677,GO:0003700,GO:0005488,GO:0005575,GO:0005622,GO:0005623,GO:0005634,GO:0006355,GO:0006950,GO:0007275,GO:0008150,GO:0009266,GO:0009409,GO:0009628,GO:0009791,GO:0009888,GO:0009889,GO:0009891,GO:0009893,GO:0009987,GO:0010374,GO:0010440,GO:0010444,GO:0010468,GO:0010556,GO:0010557,GO:0010604,GO:0010628,GO:0019219,GO:0019222,GO:0030154,GO:0031323,GO:0031325,GO:0031326,GO:…	-	-	-	-	-	-	-	-	-	-	HLH
BPChr07G30006	1.4894	0.00598051	0.0477004	BPChr07G30006	102107.XP_008225466.1	3.9e-94	351.3	KOG4293@1|root,KOG4293@2759|Eukaryota,37IWN@33090|Viridiplantae,3GAGS@35493|Streptophyta,4JHWM@91835|fabids	35493|Streptophyta	T	Eukaryotic cytochrome b561	-	-	-	ko:K03189	-	-	-	-	ko00000	-	-	-	Cytochrom_B561
BPChr10G06621	1.48921	4.46978e-05	0.000959019	BPChr10G06621	225117.XP_009345597.1	0.0	1125.9	COG0515@1|root,2QUCK@2759|Eukaryota,37S4F@33090|Viridiplantae,3GEPQ@35493|Streptophyta,4JMBK@91835|fabids	35493|Streptophyta	T	inactive receptor kinase	-	-	-	-	-	-	-	-	-	-	-	-	LRRNT_2,LRR_1,LRR_4,LRR_6,LRR_8,Pkinase_Tyr
BPChr14G28037	1.48742	0.000625031	0.00826162	BPChr14G28037	71139.XP_010049583.1	1.1e-186	659.4	COG1409@1|root,KOG1378@2759|Eukaryota,37IU0@33090|Viridiplantae,3G90S@35493|Streptophyta	35493|Streptophyta	G	Purple acid phosphatase	-	GO:0003674,GO:0003824,GO:0003993,GO:0006793,GO:0006796,GO:0008150,GO:0008152,GO:0009987,GO:0016311,GO:0016787,GO:0016788,GO:0016791,GO:0042578,GO:0044237	-	ko:K22390	-	-	-	-	ko00000	-	-	-	Metallophos,Metallophos_C,Pur_ac_phosph_N
BPChr03G28856	1.48611	1.79815e-11	1.48e-09	BPChr03G28856	71139.XP_010052352.1	7.5e-172	610.5	28NRM@1|root,2QVBP@2759|Eukaryota,37QAQ@33090|Viridiplantae,3GD2R@35493|Streptophyta	35493|Streptophyta	S	polyphenol oxidase	-	GO:0005575,GO:0005622,GO:0005623,GO:0005737,GO:0009507,GO:0009534,GO:0009536,GO:0009543,GO:0009579,GO:0031976,GO:0031977,GO:0031978,GO:0031984,GO:0043226,GO:0043227,GO:0043229,GO:0043231,GO:0044422,GO:0044424,GO:0044434,GO:0044435,GO:0044436,GO:0044444,GO:0044446,GO:0044464	1.10.3.1	ko:K00422	ko00350,ko00950,ko01100,ko01110,map00350,map00950,map01100,map01110	-	R00031,R00045,R02078	RC00046,RC00180	ko00000,ko00001,ko01000	-	-	-	PPO1_DWL,PPO1_KFDV,Tyrosinase
BPChr10G21754	1.48483	0.0021	0.0216396	BPChr10G21754	3847.GLYMA20G20950.1	4.4e-20	105.1	2BE6N@1|root,2S143@2759|Eukaryota,37VTM@33090|Viridiplantae,3GJNJ@35493|Streptophyta,4JQ3A@91835|fabids	35493|Streptophyta	-	-	-	-	-	-	-	-	-	-	-	-	-	-	-
BPChr09G20962	1.48299	0.000127162	0.00220832	BPChr09G20962	981085.XP_010088679.1	2.1e-118	432.2	COG0580@1|root,KOG0223@2759|Eukaryota,37KFM@33090|Viridiplantae,3GFE2@35493|Streptophyta,4JTEC@91835|fabids	35493|Streptophyta	G	Belongs to the MIP aquaporin (TC 1.A.8) family	-	GO:0001101,GO:0003674,GO:0005215,GO:0005372,GO:0005575,GO:0005623,GO:0005886,GO:0005887,GO:0006810,GO:0006811,GO:0006833,GO:0006950,GO:0008150,GO:0009414,GO:0009415,GO:0009628,GO:0010035,GO:0015250,GO:0015267,GO:0015318,GO:0016020,GO:0016021,GO:0022803,GO:0022838,GO:0022857,GO:0031224,GO:0031226,GO:0034220,GO:0042044,GO:0042221,GO:0044425,GO:0044459,GO:0044464,GO:0050896,GO:0051179,GO:0051234,GO:…	-	ko:K09866	ko04962,ko04976,map04962,map04976	-	-	-	ko00000,ko00001,ko02000	1.A.8	-	-	MIP
BPChr11G11755	1.48233	0.00154786	0.0171015	BPChr11G11755	102107.XP_008231067.1	7.8e-152	543.9	28MN6@1|root,2QU5Y@2759|Eukaryota,37JVU@33090|Viridiplantae,3G8RN@35493|Streptophyta,4JMNQ@91835|fabids	35493|Streptophyta	-	-	-	-	-	-	-	-	-	-	-	-	-	-	-
BPChr11G05688	1.48118	0.00250656	0.0248738	BPChr11G05688	3649.evm.model.supercontig_14.132	5.2e-240	837.0	28II8@1|root,2QQV7@2759|Eukaryota,37R5J@33090|Viridiplantae,3GA74@35493|Streptophyta,3HT94@3699|Brassicales	35493|Streptophyta	S	Protein of unknown function (DUF1336)	-	-	-	-	-	-	-	-	-	-	-	-	DUF1336
BPChr03G19833	1.48101	4.45037e-10	2.91566e-08	BPChr03G19833	3694.POPTR_0014s02270.1	9.3e-96	357.1	28M03@1|root,2QTGX@2759|Eukaryota,37SBF@33090|Viridiplantae,3G88S@35493|Streptophyta,4JIS2@91835|fabids	35493|Streptophyta	S	Carbohydrate esterase	-	-	-	-	-	-	-	-	-	-	-	-	SASA
BPChr11G28751	1.47878	1.35233e-08	6.79253e-07	BPChr11G28751	85681.XP_006430481.1	0.0	1295.8	COG1640@1|root,2QR3V@2759|Eukaryota,37K9C@33090|Viridiplantae,3GGAZ@35493|Streptophyta	35493|Streptophyta	G	4-alpha-glucanotransferase	DPE2	GO:0000023,GO:0000025,GO:0000272,GO:0001871,GO:0003674,GO:0003824,GO:0004133,GO:0004134,GO:0005488,GO:0005575,GO:0005622,GO:0005623,GO:0005737,GO:0005829,GO:0005975,GO:0005976,GO:0005977,GO:0005982,GO:0005983,GO:0005984,GO:0006073,GO:0006091,GO:0006112,GO:0008150,GO:0008152,GO:0009056,GO:0009057,GO:0009251,GO:0009311,GO:0009313,GO:0009987,GO:0010297,GO:0015980,GO:0016052,GO:0016740,GO:0016757,GO:…	2.4.1.25	ko:K00705	ko00500,ko01100,map00500,map01100	-	R05196	RC00049	ko00000,ko00001,ko01000	-	GH77	-	CBM_20,Glyco_hydro_77
BPChr14G27748	1.47752	4.43266e-05	0.000953865	BPChr14G27748	3649.evm.TU.contig_37786.1	1.3e-49	205.7	KOG4658@1|root,KOG4658@2759|Eukaryota,37T6F@33090|Viridiplantae,3GHSJ@35493|Streptophyta	35493|Streptophyta	T	Disease resistance protein	-	GO:0005575,GO:0005623,GO:0005886,GO:0006950,GO:0006952,GO:0007154,GO:0007165,GO:0008150,GO:0009987,GO:0016020,GO:0023052,GO:0044464,GO:0050789,GO:0050794,GO:0050896,GO:0051716,GO:0065007,GO:0071944	-	-	-	-	-	-	-	-	-	-	LRR_5,LRR_8,NB-ARC
BPChr09G06326	1.4775	0.000416039	0.00596181	BPChr09G06326	3641.EOX98851	1.3e-34	152.9	KOG1603@1|root,KOG1603@2759|Eukaryota,37V7G@33090|Viridiplantae,3GJCH@35493|Streptophyta	35493|Streptophyta	P	Heavy-metal-associated domain	-	-	-	-	-	-	-	-	-	-	-	-	HMA
BPChr02G19907	1.47539	5.2878e-05	0.00109813	BPChr02G19907	3641.EOX98401	0.0	1091.3	2CMPM@1|root,2QR80@2759|Eukaryota,37PYK@33090|Viridiplantae,3G8VB@35493|Streptophyta	35493|Streptophyta	S	Indole-3-acetic acid-amido synthetase	-	GO:0008150,GO:0009314,GO:0009416,GO:0009628,GO:0009719,GO:0009725,GO:0009733,GO:0010033,GO:0042221,GO:0050896	-	ko:K14487	ko04075,map04075	-	-	-	ko00000,ko00001	-	-	-	GH3
BPChr09G04130	1.4739	6.73877e-07	2.40448e-05	BPChr09G04130	102107.XP_008235943.1	2.9e-256	891.0	COG2072@1|root,KOG1399@2759|Eukaryota,37NK0@33090|Viridiplantae,3G85W@35493|Streptophyta,4JT01@91835|fabids	35493|Streptophyta	Q	flavin-containing monooxygenase	-	GO:0001666,GO:0002218,GO:0002253,GO:0002376,GO:0002682,GO:0002684,GO:0003674,GO:0003824,GO:0004497,GO:0006950,GO:0006952,GO:0006955,GO:0007154,GO:0007165,GO:0008150,GO:0008152,GO:0008219,GO:0009605,GO:0009607,GO:0009617,GO:0009620,GO:0009626,GO:0009627,GO:0009628,GO:0009814,GO:0009870,GO:0009987,GO:0010204,GO:0012501,GO:0016491,GO:0023052,GO:0031347,GO:0031349,GO:0033554,GO:0034050,GO:0036293,GO:…	1.14.13.8	ko:K00485	ko00982,ko01120,map00982,map01120	-	R08266	RC02233	ko00000,ko00001,ko01000	-	-	-	FMO-like
BPChr01G18064	1.47065	0.0016714	0.018129	BPChr01G18064	29760.VIT_18s0001g08650.t01	2.2e-228	798.5	28J7T@1|root,2QRK7@2759|Eukaryota,37MV0@33090|Viridiplantae,3GFPP@35493|Streptophyta	35493|Streptophyta	K	growth-regulating factor	-	-	-	-	-	-	-	-	-	-	-	-	QLQ,WRC
BPChr06G21441	1.46838	2.99142e-06	8.9056e-05	BPChr06G21441	102107.XP_008228455.1	5.7e-28	130.2	2CP1W@1|root,2S422@2759|Eukaryota,37WHP@33090|Viridiplantae,3GKXP@35493|Streptophyta,4JV3F@91835|fabids	35493|Streptophyta	-	-	-	-	-	-	-	-	-	-	-	-	-	-	-
BPChr09G17892	1.46783	3.46933e-12	3.31098e-10	BPChr09G17892	102107.XP_008218687.1	0.0	1499.2	COG4354@1|root,KOG2119@2759|Eukaryota,37JKE@33090|Viridiplantae,3GG94@35493|Streptophyta,4JD1A@91835|fabids	35493|Streptophyta	G	Non-lysosomal glucosylceramidase that catalyzes the conversion of glucosylceramide to free glucose and ceramide	-	GO:0003674,GO:0003824,GO:0004348,GO:0004553,GO:0005575,GO:0005622,GO:0005623,GO:0005737,GO:0005783,GO:0005790,GO:0005886,GO:0006082,GO:0006629,GO:0006643,GO:0006664,GO:0006665,GO:0006687,GO:0006807,GO:0007275,GO:0007399,GO:0007417,GO:0008150,GO:0008152,GO:0008202,GO:0008206,GO:0008422,GO:0009056,GO:0009987,GO:0012505,GO:0015926,GO:0016020,GO:0016021,GO:0016137,GO:0016139,GO:0016787,GO:0016798,GO:…	3.2.1.45	ko:K17108	ko00511,ko00600,ko01100,map00511,map00600,map01100	-	R01498	RC00059,RC00451	ko00000,ko00001,ko01000	-	GH116	-	DUF608,Glyco_hydr_116N
BPunChr33231	1.46697	1.3568e-09	8.00551e-08	BPunChr33231	3760.EMJ06077	0.0	1410.6	COG1640@1|root,2QR3V@2759|Eukaryota,37K9C@33090|Viridiplantae,3GGAZ@35493|Streptophyta,4JIY5@91835|fabids	35493|Streptophyta	G	4-alpha-glucanotransferase	DPE2	GO:0000023,GO:0000025,GO:0000272,GO:0001871,GO:0003674,GO:0003824,GO:0004133,GO:0004134,GO:0005488,GO:0005575,GO:0005622,GO:0005623,GO:0005737,GO:0005829,GO:0005975,GO:0005976,GO:0005977,GO:0005982,GO:0005983,GO:0005984,GO:0006073,GO:0006091,GO:0006112,GO:0008150,GO:0008152,GO:0009056,GO:0009057,GO:0009251,GO:0009311,GO:0009313,GO:0009987,GO:0010297,GO:0015980,GO:0016052,GO:0016740,GO:0016757,GO:…	2.4.1.25	ko:K00705	ko00500,ko01100,map00500,map01100	-	R05196	RC00049	ko00000,ko00001,ko01000	-	GH77	-	CBM_20,Glyco_hydro_77
BPChr06G31400	1.46691	0.00029838	0.00455215	BPChr06G31400	3750.XP_008388544.1	3.8e-54	218.0	COG5262@1|root,KOG1756@2759|Eukaryota,37TUU@33090|Viridiplantae,3GIXS@35493|Streptophyta,4JPX9@91835|fabids	35493|Streptophyta	B	Histone H2A	-	GO:0000228,GO:0000785,GO:0000790,GO:0000792,GO:0003674,GO:0003676,GO:0003677,GO:0003682,GO:0005488,GO:0005575,GO:0005622,GO:0005623,GO:0005634,GO:0005694,GO:0005730,GO:0006325,GO:0006342,GO:0006355,GO:0006996,GO:0008150,GO:0009889,GO:0009890,GO:0009892,GO:0009987,GO:0010468,GO:0010556,GO:0010558,GO:0010605,GO:0010629,GO:0016043,GO:0016458,GO:0019219,GO:0019222,GO:0031323,GO:0031324,GO:0031326,GO:…	-	ko:K11251	ko04217,ko05034,ko05322,map04217,map05034,map05322	-	-	-	ko00000,ko00001,ko03036,ko04147	-	-	-	Histone,Histone_H2A_C
BPChr08G03006	1.46655	0.000738795	0.00943432	BPChr08G03006	29760.VIT_01s0010g03060.t01	1.9e-42	179.5	2AFWC@1|root,2STN7@2759|Eukaryota,3815I@33090|Viridiplantae,3GK99@35493|Streptophyta	35493|Streptophyta	-	-	-	-	-	-	-	-	-	-	-	-	-	-	-
BPChr08G31909	1.45767	2.0364e-13	2.30584e-11	BPChr08G31909	3641.EOY23705	2.9e-99	368.6	COG1544@1|root,2QQ0F@2759|Eukaryota,37P9W@33090|Viridiplantae,3GH6N@35493|Streptophyta	35493|Streptophyta	J	Ribosome-binding factor PSRP1	-	-	-	-	-	-	-	-	-	-	-	-	Ribosom_S30AE_C,Ribosomal_S30AE
BPChr03G13880	1.45648	9.85023e-07	3.36161e-05	BPChr03G13880	3988.XP_002533409.1	1.9e-272	945.3	2EDC1@1|root,2SJ0J@2759|Eukaryota,37Z6W@33090|Viridiplantae,3GPAT@35493|Streptophyta	35493|Streptophyta	T	Encoded by	-	-	-	-	-	-	-	-	-	-	-	-	B_lectin,Pkinase
BPChr10G03546	1.45638	0.00155922	0.0172174	BPChr10G03546	3641.EOY33637	2.6e-211	741.5	KOG2183@1|root,KOG2183@2759|Eukaryota,37ME9@33090|Viridiplantae,3GFCY@35493|Streptophyta	35493|Streptophyta	O	Lysosomal Pro-X carboxypeptidase-like	-	-	3.4.16.2	ko:K01285	ko04614,ko04974,map04614,map04974	-	-	-	ko00000,ko00001,ko01000,ko01002	-	-	-	Peptidase_S28
BPChr10G04257	1.4551	0.00101801	0.0122342	BPChr10G04257	225117.XP_009352411.1	8.7e-216	756.5	COG3104@1|root,KOG1237@2759|Eukaryota,37KR7@33090|Viridiplantae,3G95B@35493|Streptophyta,4JJYC@91835|fabids	35493|Streptophyta	E	Protein NRT1 PTR FAMILY	-	GO:0003674,GO:0005215,GO:0005575,GO:0005623,GO:0005886,GO:0006810,GO:0006811,GO:0006820,GO:0006821,GO:0006950,GO:0006970,GO:0008150,GO:0008509,GO:0009268,GO:0009605,GO:0009607,GO:0009624,GO:0009628,GO:0009651,GO:0009987,GO:0010447,GO:0010542,GO:0015075,GO:0015103,GO:0015108,GO:0015112,GO:0015291,GO:0015318,GO:0015513,GO:0015562,GO:0015698,GO:0015706,GO:0016020,GO:0022804,GO:0022857,GO:0033554,GO:…	-	ko:K14638	-	-	-	-	ko00000,ko02000	2.A.17.3	-	-	PTR2
BPChr04G27196	1.45506	6.57679e-11	4.89858e-09	BPChr04G27196	71139.XP_010063052.1	6.3e-219	766.9	COG0544@1|root,2QUET@2759|Eukaryota,37JC3@33090|Viridiplantae,3GF26@35493|Streptophyta	35493|Streptophyta	O	Trigger factor-like protein	-	GO:0005575,GO:0005622,GO:0005623,GO:0005737,GO:0009507,GO:0009526,GO:0009532,GO:0009536,GO:0009570,GO:0009941,GO:0031967,GO:0031975,GO:0043226,GO:0043227,GO:0043229,GO:0043231,GO:0044422,GO:0044424,GO:0044434,GO:0044435,GO:0044444,GO:0044446,GO:0044464	-	ko:K03545	-	-	-	-	ko00000	-	-	-	Trigger_C,Trigger_N
BPChr14G02054	1.45154	0.00266842	0.0261228	BPChr14G02054	3641.EOY07065	2.8e-155	555.1	COG0515@1|root,2QRJ8@2759|Eukaryota,37PKM@33090|Viridiplantae,3G85J@35493|Streptophyta	35493|Streptophyta	T	Leucine-rich repeat receptor-like protein kinase	-	GO:0005575,GO:0005618,GO:0005623,GO:0005886,GO:0005911,GO:0009505,GO:0009506,GO:0016020,GO:0030054,GO:0030312,GO:0044464,GO:0055044,GO:0071944	-	-	-	-	-	-	-	-	-	-	LRRNT_2,LRR_1,LRR_6,LRR_8,Pkinase,Pkinase_Tyr
BPChr12G11394	1.45078	0.000101278	0.00184897	BPChr12G11394	3641.EOY14481	3.7e-15	87.4	2E8YR@1|root,2SFD6@2759|Eukaryota,37XCN@33090|Viridiplantae,3GMR4@35493|Streptophyta	35493|Streptophyta	S	calcium-binding protein	-	-	-	-	-	-	-	-	-	-	-	-	EF-hand_1,EF-hand_5,EF-hand_7
BPChr06G30955	1.44762	5.23051e-05	0.00108885	BPChr06G30955	29760.VIT_13s0067g01500.t01	5.3e-70	271.6	29E48@1|root,2QU3M@2759|Eukaryota,37TC9@33090|Viridiplantae,3GHRJ@35493|Streptophyta	35493|Streptophyta	K	Myb-like DNA-binding domain	-	GO:0003674,GO:0003700,GO:0006355,GO:0008150,GO:0009889,GO:0010468,GO:0010556,GO:0019219,GO:0019222,GO:0031323,GO:0031326,GO:0050789,GO:0050794,GO:0051171,GO:0051252,GO:0060255,GO:0065007,GO:0080090,GO:0140110,GO:1903506,GO:2000112,GO:2001141	-	-	-	-	-	-	-	-	-	-	Myb_DNA-binding
BPChr05G07803	1.4322	1.29355e-11	1.11137e-09	BPChr05G07803	85681.XP_006444238.1	5.9e-92	344.7	28MSX@1|root,2QVV7@2759|Eukaryota,37IPW@33090|Viridiplantae,3GFU1@35493|Streptophyta	35493|Streptophyta	K	Zinc finger protein	-	GO:0001067,GO:0003674,GO:0003676,GO:0003677,GO:0003700,GO:0005488,GO:0006355,GO:0008150,GO:0009889,GO:0010468,GO:0010556,GO:0019219,GO:0019222,GO:0031323,GO:0031326,GO:0043565,GO:0044212,GO:0050789,GO:0050794,GO:0051171,GO:0051252,GO:0060255,GO:0065007,GO:0080090,GO:0097159,GO:0140110,GO:1901363,GO:1903506,GO:2000112,GO:2001141	-	-	-	-	-	-	-	-	-	-	CCT,zf-B_box
BPChr07G09963	1.43073	0.00496873	0.0416194	BPChr07G09963	85681.XP_006431535.1	7.2e-43	181.4	2CVZE@1|root,2S4HR@2759|Eukaryota,37WJ2@33090|Viridiplantae,3GXNA@35493|Streptophyta	35493|Streptophyta	S	No apical meristem-associated C-terminal domain	-	-	-	-	-	-	-	-	-	-	-	-	NAM-associated
BPChr11G01725	1.42978	1.04583e-10	7.58768e-09	BPChr11G01725	4098.XP_009588682.1	1.7e-53	215.7	2CXU2@1|root,2RZS0@2759|Eukaryota,37UQ3@33090|Viridiplantae,3GIYH@35493|Streptophyta,44JUE@71274|asterids	35493|Streptophyta	U	Outer envelope pore protein 16	-	GO:0001101,GO:0003333,GO:0003674,GO:0005215,GO:0005342,GO:0005488,GO:0005515,GO:0005575,GO:0005622,GO:0005623,GO:0005737,GO:0005739,GO:0005740,GO:0005743,GO:0005744,GO:0005773,GO:0006605,GO:0006626,GO:0006810,GO:0006811,GO:0006820,GO:0006839,GO:0006865,GO:0006886,GO:0006950,GO:0006996,GO:0007005,GO:0008104,GO:0008150,GO:0008509,GO:0008514,GO:0009266,GO:0009409,GO:0009507,GO:0009513,GO:0009526,GO:…	-	-	-	-	-	-	-	-	-	-	Tim17
BPunChr33531	1.42793	7.34152e-06	0.000195664	BPunChr33531	2711.XP_006470794.1	2.6e-121	441.4	28K4N@1|root,2QSJ8@2759|Eukaryota,37SDJ@33090|Viridiplantae,3GDKF@35493|Streptophyta	35493|Streptophyta	S	PCTP-like protein	-	-	-	-	-	-	-	-	-	-	-	-	START
BPChr05G07809	1.42687	4.29685e-06	0.000122164	BPChr05G07809	2711.XP_006479883.1	4.7e-43	180.3	COG0695@1|root,KOG1752@2759|Eukaryota,37V7R@33090|Viridiplantae,3GJM2@35493|Streptophyta	35493|Streptophyta	O	Monothiol	-	-	-	ko:K03676	-	-	-	-	ko00000,ko03110	-	-	-	Glutaredoxin
BPChr11G07225	1.42542	0.000402707	0.00580045	BPChr11G07225	2711.XP_006470794.1	3.1e-122	444.5	28K4N@1|root,2QSJ8@2759|Eukaryota,37SDJ@33090|Viridiplantae,3GDKF@35493|Streptophyta	35493|Streptophyta	S	PCTP-like protein	-	-	-	-	-	-	-	-	-	-	-	-	START
BPChr08G18143	1.42355	0.000602111	0.00802364	BPChr08G18143	3847.GLYMA09G22580.1	4.1e-78	297.7	28M2D@1|root,2QTJ2@2759|Eukaryota,37TUS@33090|Viridiplantae,3G8F4@35493|Streptophyta,4JI25@91835|fabids	35493|Streptophyta	S	Peroxygenase	-	GO:0001101,GO:0003674,GO:0003824,GO:0006950,GO:0008150,GO:0009414,GO:0009415,GO:0009628,GO:0009719,GO:0009725,GO:0009737,GO:0009819,GO:0010033,GO:0010035,GO:0016298,GO:0016787,GO:0016788,GO:0033993,GO:0042221,GO:0050896,GO:0097305,GO:1901700	1.11.2.3	ko:K17991	ko00073,map00073	-	R09462,R09463	RC01711	ko00000,ko00001,ko01000	-	-	-	Caleosin
BPChr08G15801	1.42249	4.38196e-07	1.64441e-05	BPChr08G15801	3760.EMJ23020	2.9e-289	1000.7	KOG2469@1|root,KOG2469@2759|Eukaryota,37QAK@33090|Viridiplantae,3GE6Q@35493|Streptophyta,4JKMP@91835|fabids	35493|Streptophyta	F	Cytosolic purine	-	-	-	ko:K09493	-	-	-	-	ko00000,ko03036,ko03110,ko04147	-	-	-	5_nucleotid
BPChr02G20792	1.42171	8.68355e-10	5.366e-08	BPChr02G20792	29730.Gorai.008G227400.1	9.4e-37	159.8	2A1ID@1|root,2RY0V@2759|Eukaryota,37TT9@33090|Viridiplantae,3GHZN@35493|Streptophyta	35493|Streptophyta	S	regulation of plant-type hypersensitive response	-	GO:0002682,GO:0002683,GO:0005575,GO:0005622,GO:0005623,GO:0005634,GO:0008150,GO:0010363,GO:0010941,GO:0031347,GO:0031348,GO:0034051,GO:0043067,GO:0043069,GO:0043226,GO:0043227,GO:0043229,GO:0043231,GO:0044424,GO:0044464,GO:0045088,GO:0045595,GO:0045824,GO:0048519,GO:0048523,GO:0048583,GO:0048585,GO:0050776,GO:0050777,GO:0050789,GO:0050793,GO:0050794,GO:0060548,GO:0065007,GO:0080134,GO:0080135	-	-	-	-	-	-	-	-	-	-	zf-LSD1
BPChr11G28672	1.41701	9.62412e-17	1.48446e-14	BPChr11G28672	3641.EOX93811	1.7e-138	499.2	2CMA7@1|root,2QPS7@2759|Eukaryota,37KW9@33090|Viridiplantae,3GH4S@35493|Streptophyta	35493|Streptophyta	S	Protein of unknown function (DUF760)	-	-	-	-	-	-	-	-	-	-	-	-	DUF760
BPChr07G18859	1.41582	0.000745931	0.00950067	BPChr07G18859	90675.XP_010456468.1	2.7e-107	394.8	COG2036@1|root,KOG1745@2759|Eukaryota,37TRG@33090|Viridiplantae,3GI60@35493|Streptophyta,3HZG6@3699|Brassicales	35493|Streptophyta	B	Core histone H2A/H2B/H3/H4	-	-	-	ko:K11253	ko05034,ko05202,ko05322,map05034,map05202,map05322	-	-	-	ko00000,ko00001,ko03036,ko04147	-	-	-	Histone
BPChr04G01071	1.4145	0.00207147	0.0214165	BPChr04G01071	2711.XP_006469612.1	1.4e-218	765.8	2CNE5@1|root,2QVK5@2759|Eukaryota,37KR2@33090|Viridiplantae,3GF3K@35493|Streptophyta	35493|Streptophyta	G	Belongs to the glycosyl hydrolase 17 family	-	-	-	-	-	-	-	-	-	-	-	-	Glyco_hydro_17,X8
BPChr09G16380	1.41385	0.000431873	0.0061304	BPChr09G16380	225117.XP_009358739.1	1.8e-233	815.1	COG3866@1|root,2QPY9@2759|Eukaryota,37JDE@33090|Viridiplantae,3G8YM@35493|Streptophyta,4JM9Y@91835|fabids	35493|Streptophyta	G	Pectate lyase	-	-	4.2.2.2	ko:K01728	ko00040,ko02024,map00040,map02024	-	R02361,R06240	RC00049,RC00705	ko00000,ko00001,ko01000	-	-	-	Pec_lyase_C
BPChr11G01831	1.40919	6.94925e-10	4.39125e-08	BPChr11G01831	102107.XP_008223717.1	9.5e-140	503.1	28JEF@1|root,2QR06@2759|Eukaryota,37JKQ@33090|Viridiplantae,3GATN@35493|Streptophyta,4JRU7@91835|fabids	35493|Streptophyta	S	Rare lipoprotein A (RlpA)-like double-psi beta-barrel	-	GO:0005575,GO:0005618,GO:0005622,GO:0005623,GO:0005737,GO:0005829,GO:0005911,GO:0006949,GO:0008150,GO:0009505,GO:0009506,GO:0009653,GO:0009987,GO:0030054,GO:0030312,GO:0032502,GO:0044424,GO:0044444,GO:0044464,GO:0048646,GO:0048856,GO:0055044,GO:0071944	-	-	-	-	-	-	-	-	-	-	DPBB_1,Pollen_allerg_1
BPChr10G04254	1.40908	0.000511616	0.00702315	BPChr10G04254	225117.XP_009352411.1	3.9e-211	741.5	COG3104@1|root,KOG1237@2759|Eukaryota,37KR7@33090|Viridiplantae,3G95B@35493|Streptophyta,4JJYC@91835|fabids	35493|Streptophyta	E	Protein NRT1 PTR FAMILY	-	GO:0003674,GO:0005215,GO:0005575,GO:0005623,GO:0005886,GO:0006810,GO:0006811,GO:0006820,GO:0006821,GO:0006950,GO:0006970,GO:0008150,GO:0008509,GO:0009268,GO:0009605,GO:0009607,GO:0009624,GO:0009628,GO:0009651,GO:0009987,GO:0010447,GO:0010542,GO:0015075,GO:0015103,GO:0015108,GO:0015112,GO:0015291,GO:0015318,GO:0015513,GO:0015562,GO:0015698,GO:0015706,GO:0016020,GO:0022804,GO:0022857,GO:0033554,GO:…	-	ko:K14638	-	-	-	-	ko00000,ko02000	2.A.17.3	-	-	PTR2
BPChr13G00823	1.40813	0.00197315	0.0206745	BPChr13G00823	3760.EMJ06785	2.5e-116	425.2	28PGU@1|root,2QW4Y@2759|Eukaryota,37QMR@33090|Viridiplantae,3G9C4@35493|Streptophyta,4JM53@91835|fabids	35493|Streptophyta	S	Family of unknown function (DUF716)	-	-	-	-	-	-	-	-	-	-	-	-	DUF716
BPChr05G31574	1.40178	5.65175e-09	3.03321e-07	BPChr05G31574	2711.XP_006474809.1	6.5e-246	856.7	COG0572@1|root,KOG4203@2759|Eukaryota,37MJC@33090|Viridiplantae,3GESD@35493|Streptophyta	35493|Streptophyta	F	belongs to the uridine kinase family	-	GO:0003674,GO:0003824,GO:0004849,GO:0005575,GO:0005622,GO:0005623,GO:0005737,GO:0005829,GO:0006139,GO:0006206,GO:0006213,GO:0006220,GO:0006221,GO:0006222,GO:0006725,GO:0006753,GO:0006793,GO:0006796,GO:0006807,GO:0008150,GO:0008152,GO:0008655,GO:0009058,GO:0009112,GO:0009116,GO:0009117,GO:0009119,GO:0009123,GO:0009124,GO:0009129,GO:0009130,GO:0009156,GO:0009161,GO:0009163,GO:0009165,GO:0009173,GO:…	2.7.1.48	ko:K00876	ko00240,ko00983,ko01100,map00240,map00983,map01100	-	R00513,R00516,R00517,R00962,R00964,R00967,R00968,R00970,R01548,R01549,R01880,R02091,R02096,R02097,R02327,R02332,R02371,R02372,R08232	RC00002,RC00017	ko00000,ko00001,ko01000	-	-	-	PRK,UPRTase
BPChr13G07711	1.39972	0.00533965	0.0437496	BPChr13G07711	102107.XP_008231334.1	0.0	1138.3	2CMPW@1|root,2QR9H@2759|Eukaryota,37KFF@33090|Viridiplantae,3G74Y@35493|Streptophyta,4JHTP@91835|fabids	35493|Streptophyta	S	Multiple C2 and transmembrane domain-containing protein	-	GO:0003674,GO:0005488,GO:0005509,GO:0005575,GO:0005622,GO:0005623,GO:0005634,GO:0005654,GO:0005737,GO:0005783,GO:0005829,GO:0012505,GO:0016020,GO:0016021,GO:0031224,GO:0031974,GO:0031981,GO:0043167,GO:0043169,GO:0043226,GO:0043227,GO:0043229,GO:0043231,GO:0043233,GO:0044422,GO:0044424,GO:0044425,GO:0044428,GO:0044444,GO:0044446,GO:0044464,GO:0046872,GO:0070013	-	-	-	-	-	-	-	-	-	-	C2,PRT_C
BPChr06G11046	1.39488	0.00555312	0.0448948	BPChr06G11046	3641.EOY18602	1.4e-213	749.2	28P0B@1|root,2QVKX@2759|Eukaryota,37HTG@33090|Viridiplantae,3GHD5@35493|Streptophyta	35493|Streptophyta	G	May be involved in modulation of pathogen defense and leaf cell death	-	GO:0002376,GO:0005575,GO:0005623,GO:0005886,GO:0006950,GO:0006952,GO:0006955,GO:0007275,GO:0007568,GO:0008150,GO:0009605,GO:0009607,GO:0009620,GO:0009814,GO:0009817,GO:0010150,GO:0016020,GO:0032501,GO:0032502,GO:0043207,GO:0044464,GO:0045087,GO:0048366,GO:0048367,GO:0048731,GO:0048827,GO:0048856,GO:0050832,GO:0050896,GO:0051704,GO:0051707,GO:0071944,GO:0090693,GO:0098542,GO:0099402	-	ko:K08472	-	-	-	-	ko00000,ko04030	-	-	-	Mlo
BPChr06G08539	1.39353	0.000108585	0.00195503	BPChr06G08539	3983.cassava4.1_005801m	1.4e-241	842.0	COG0500@1|root,KOG1269@2759|Eukaryota,37MW5@33090|Viridiplantae,3G8XR@35493|Streptophyta,4JH7B@91835|fabids	35493|Streptophyta	I	Phosphoethanolamine N-methyltransferase	-	GO:0000003,GO:0000902,GO:0000904,GO:0001505,GO:0003006,GO:0003674,GO:0003824,GO:0005575,GO:0005622,GO:0005623,GO:0005737,GO:0005829,GO:0006576,GO:0006629,GO:0006644,GO:0006650,GO:0006656,GO:0006793,GO:0006796,GO:0006807,GO:0006935,GO:0007275,GO:0008150,GO:0008152,GO:0008168,GO:0008170,GO:0008610,GO:0008654,GO:0008757,GO:0009058,GO:0009308,GO:0009309,GO:0009555,GO:0009605,GO:0009653,GO:0009791,GO:…	2.1.1.103	ko:K05929	ko00564,map00564	-	R02037,R06868,R06869	RC00003,RC00060,RC00181,RC00496	ko00000,ko00001,ko01000	-	-	-	Methyltransf_11,Methyltransf_25,Methyltransf_31
BPChr06G08115	1.39202	1.65358e-15	2.33035e-13	BPChr06G08115	3641.EOX93811	1.7e-138	499.2	2CMA7@1|root,2QPS7@2759|Eukaryota,37KW9@33090|Viridiplantae,3GH4S@35493|Streptophyta	35493|Streptophyta	S	Protein of unknown function (DUF760)	-	-	-	-	-	-	-	-	-	-	-	-	DUF760
BPChr06G11116	1.39115	2.36173e-05	0.000544281	BPChr06G11116	3641.EOY21363	1e-34	153.7	29V2K@1|root,2RXK1@2759|Eukaryota,37U71@33090|Viridiplantae,3GHWH@35493|Streptophyta	35493|Streptophyta	-	-	-	-	-	-	-	-	-	-	-	-	-	-	-
BPChr09G29729	1.38793	0.000804981	0.0101407	BPChr09G29729	29730.Gorai.008G185000.1	1.8e-195	688.7	2CNHP@1|root,2QWDU@2759|Eukaryota,37M1Q@33090|Viridiplantae,3GDIC@35493|Streptophyta	35493|Streptophyta	K	Transcription factor	-	GO:0003674,GO:0003676,GO:0003677,GO:0003700,GO:0005488,GO:0005575,GO:0005622,GO:0005623,GO:0005634,GO:0006355,GO:0008150,GO:0009889,GO:0009909,GO:0010468,GO:0010556,GO:0019219,GO:0019222,GO:0031323,GO:0031326,GO:0043226,GO:0043227,GO:0043229,GO:0043231,GO:0044424,GO:0044464,GO:0048580,GO:0048831,GO:0050789,GO:0050793,GO:0050794,GO:0051171,GO:0051239,GO:0051252,GO:0060255,GO:0065007,GO:0080090,GO:…	-	ko:K14431	ko04075,map04075	-	-	-	ko00000,ko00001,ko03000	-	-	-	DOG1,bZIP_1,bZIP_2
BPChr05G14943	1.38224	0.000857567	0.010666	BPChr05G14943	3983.cassava4.1_026369m	2.5e-87	328.9	KOG0394@1|root,KOG0394@2759|Eukaryota,37Y48@33090|Viridiplantae,3GGRD@35493|Streptophyta	35493|Streptophyta	U	Ras-related protein	-	-	-	ko:K07897,ko:K07976	ko04137,ko04138,ko04140,ko04144,ko04145,ko05132,ko05146,ko05152,map04137,map04138,map04140,map04144,map04145,map05132,map05146,map05152	-	-	-	ko00000,ko00001,ko04031,ko04131,ko04147	-	-	-	Ras
BPChr03G11668	1.3785	0.000258411	0.0040367	BPChr03G11668	3760.EMJ12886	2.4e-168	598.6	KOG1339@1|root,KOG1339@2759|Eukaryota,37M4V@33090|Viridiplantae,3GEPA@35493|Streptophyta,4JFCR@91835|fabids	35493|Streptophyta	O	Belongs to the peptidase A1 family	-	GO:0003674,GO:0003824,GO:0004175,GO:0004190,GO:0006508,GO:0006807,GO:0008150,GO:0008152,GO:0008233,GO:0009056,GO:0009057,GO:0016787,GO:0019538,GO:0030163,GO:0043170,GO:0044238,GO:0070001,GO:0070011,GO:0071704,GO:0140096,GO:1901564,GO:1901565,GO:1901575	-	-	-	-	-	-	-	-	-	-	TAXi_C,TAXi_N
BPChr14G18086	1.37743	0.00133885	0.0152127	BPChr14G18086	3983.cassava4.1_014866m	6.2e-46	191.0	KOG4197@1|root,KOG4197@2759|Eukaryota,37JEI@33090|Viridiplantae,3G9F0@35493|Streptophyta,4JI8Y@91835|fabids	35493|Streptophyta	S	Pentatricopeptide repeat-containing protein	-	GO:0003674,GO:0003676,GO:0003723,GO:0003824,GO:0004518,GO:0004519,GO:0005488,GO:0005575,GO:0005622,GO:0005623,GO:0006139,GO:0006725,GO:0006807,GO:0008150,GO:0008152,GO:0009451,GO:0009987,GO:0016070,GO:0016787,GO:0016788,GO:0034641,GO:0043170,GO:0043226,GO:0043227,GO:0043229,GO:0043231,GO:0043412,GO:0044237,GO:0044238,GO:0044424,GO:0044464,GO:0046483,GO:0071704,GO:0090304,GO:0090305,GO:0097159,GO:…	-	ko:K17710	-	-	-	-	ko00000,ko03016,ko03029	-	-	-	PPR,PPR_2,PPR_3
BPChr03G19808	1.37481	9.09944e-07	3.13819e-05	BPChr03G19808	102107.XP_008235326.1	3.7e-225	787.7	2C7VE@1|root,2QR17@2759|Eukaryota,37SXD@33090|Viridiplantae,3GG8G@35493|Streptophyta,4JHBX@91835|fabids	35493|Streptophyta	S	F-box LRR-repeat protein	-	GO:0000003,GO:0000151,GO:0000278,GO:0000280,GO:0001673,GO:0003006,GO:0005575,GO:0005622,GO:0005623,GO:0005634,GO:0006508,GO:0006511,GO:0006807,GO:0006996,GO:0007049,GO:0007275,GO:0007276,GO:0008150,GO:0008152,GO:0009056,GO:0009057,GO:0009555,GO:0009790,GO:0009791,GO:0009793,GO:0009987,GO:0010154,GO:0010498,GO:0016043,GO:0019005,GO:0019538,GO:0019941,GO:0019953,GO:0022402,GO:0022412,GO:0022414,GO:…	-	-	-	-	-	-	-	-	-	-	F-box,F-box-like
BPChr12G25407	1.3748	0.000887592	0.0109628	BPChr12G25407	29760.VIT_07s0130g00060.t01	7.5e-272	943.0	28IFZ@1|root,2QQSV@2759|Eukaryota,37I3V@33090|Viridiplantae,3GDT0@35493|Streptophyta	35493|Streptophyta	S	Protein kinase superfamily protein	-	-	-	-	-	-	-	-	-	-	-	-	-
BPChr11G05700	1.37267	0.00345755	0.0318115	BPChr11G05700	102107.XP_008230697.1	5.2e-22	110.2	2E2QY@1|root,2S9XV@2759|Eukaryota,37WYR@33090|Viridiplantae,3GKWP@35493|Streptophyta,4JR0J@91835|fabids	35493|Streptophyta	S	CLAVATA3 ESR (CLE)-related protein	-	-	-	-	-	-	-	-	-	-	-	-	-
BPChr13G01344	1.36896	9.18715e-21	1.87466e-18	BPChr13G01344	3760.EMJ19250	1.6e-128	467.2	28KXZ@1|root,2QTEM@2759|Eukaryota,37SMB@33090|Viridiplantae,3GCXF@35493|Streptophyta,4JI6E@91835|fabids	35493|Streptophyta	-	-	-	-	-	-	-	-	-	-	-	-	-	-	Transglut_core2
BPChr06G26129	1.36864	0.0016825	0.0182394	BPChr06G26129	29760.VIT_08s0056g00210.t01	2.5e-164	584.7	KOG0594@1|root,KOG0594@2759|Eukaryota,37KB1@33090|Viridiplantae,3G9GE@35493|Streptophyta	35493|Streptophyta	T	Belongs to the protein kinase superfamily	-	GO:0000003,GO:0000082,GO:0000278,GO:0000307,GO:0000902,GO:0003006,GO:0003674,GO:0003824,GO:0004672,GO:0004674,GO:0004693,GO:0005488,GO:0005515,GO:0005575,GO:0005622,GO:0005623,GO:0005634,GO:0005737,GO:0006139,GO:0006259,GO:0006260,GO:0006261,GO:0006275,GO:0006464,GO:0006468,GO:0006725,GO:0006793,GO:0006796,GO:0006807,GO:0007049,GO:0007154,GO:0007165,GO:0007275,GO:0007346,GO:0008150,GO:0008152,GO:…	2.7.11.22	ko:K07760	-	M00693	-	-	ko00000,ko00002,ko01000,ko01001	-	-	-	Pkinase
BPChr08G06291	1.36636	2.40654e-10	1.64257e-08	BPChr08G06291	3641.EOY16207	4.8e-174	617.5	2C3EN@1|root,2QQ00@2759|Eukaryota,37MXM@33090|Viridiplantae,3GEBI@35493|Streptophyta	35493|Streptophyta	S	Zinc finger protein	-	-	-	-	-	-	-	-	-	-	-	-	-
BPChr05G27334	1.36619	0.00229155	0.0232587	BPChr05G27334	3885.XP_007141782.1	9.1e-14	84.0	2DZV1@1|root,2S7BK@2759|Eukaryota,37WUP@33090|Viridiplantae,3GKRT@35493|Streptophyta,4JR3U@91835|fabids	35493|Streptophyta	S	Ubiquitin-binding WIYLD domain	-	-	-	-	-	-	-	-	-	-	-	-	WIYLD
BPChr01G22861	1.3638	2.31568e-10	1.58608e-08	BPChr01G22861	3983.cassava4.1_001621m	0.0	1459.5	COG1874@1|root,KOG0496@2759|Eukaryota,37MUE@33090|Viridiplantae,3G9Z7@35493|Streptophyta,4JEX0@91835|fabids	35493|Streptophyta	G	beta-galactosidase	-	GO:0003674,GO:0003824,GO:0004553,GO:0004565,GO:0005575,GO:0005618,GO:0005622,GO:0005623,GO:0005737,GO:0005773,GO:0009505,GO:0015925,GO:0016787,GO:0016798,GO:0030312,GO:0043226,GO:0043227,GO:0043229,GO:0043231,GO:0044424,GO:0044444,GO:0044464,GO:0071944	-	-	-	-	-	-	-	-	-	-	Gal_Lectin,Glyco_hydro_35
BPChr14G27961	1.35755	0.00077694	0.0098317	BPChr14G27961	3694.POPTR_0001s35870.1	2.9e-295	1021.1	28JSW@1|root,2QRW8@2759|Eukaryota,37RZI@33090|Viridiplantae,3GA39@35493|Streptophyta,4JKJA@91835|fabids	35493|Streptophyta	S	Sieve element occlusion N-terminus	-	GO:0003674,GO:0005488,GO:0005515,GO:0008150,GO:0009888,GO:0010087,GO:0010088,GO:0032502,GO:0042802,GO:0042803,GO:0043621,GO:0046983,GO:0048856	-	-	-	-	-	-	-	-	-	-	SEO_C,SEO_N
BPChr05G31790	1.35652	0.00482684	0.040738	BPChr05G31790	29730.Gorai.007G279600.1	7.5e-94	350.1	KOG3227@1|root,KOG3227@2759|Eukaryota,37MVA@33090|Viridiplantae,3GCQQ@35493|Streptophyta	35493|Streptophyta	K	grf1-interacting factor	-	-	-	-	-	-	-	-	-	-	-	-	SSXT
BPChr10G21792	1.35587	2.45024e-10	1.66659e-08	BPChr10G21792	3641.EOY34598	9.5e-184	649.8	KOG1192@1|root,KOG1192@2759|Eukaryota,37M7J@33090|Viridiplantae,3GEXZ@35493|Streptophyta	35493|Streptophyta	CG	UDP-Glycosyltransferase	-	GO:0003674,GO:0003824,GO:0005575,GO:0005622,GO:0005623,GO:0005634,GO:0005737,GO:0005829,GO:0008150,GO:0008194,GO:0009909,GO:0016740,GO:0016757,GO:0016758,GO:0035251,GO:0043226,GO:0043227,GO:0043229,GO:0043231,GO:0044424,GO:0044444,GO:0044464,GO:0046527,GO:0048580,GO:0048831,GO:0050789,GO:0050793,GO:0051239,GO:0065007,GO:0080043,GO:0080044,GO:2000026,GO:2000241	2.4.1.324	ko:K21374	-	-	-	-	ko00000,ko01000,ko01003	-	GT1	-	UDPGT
BPChr03G23151	1.35202	0.00314371	0.0296781	BPChr03G23151	57918.XP_004287090.1	7.6e-209	733.0	COG1012@1|root,KOG2450@2759|Eukaryota,37Q0A@33090|Viridiplantae,3GBC3@35493|Streptophyta,4JIH8@91835|fabids	35493|Streptophyta	C	Aldehyde dehydrogenase family	-	GO:0003674,GO:0003824,GO:0004029,GO:0004030,GO:0006725,GO:0008150,GO:0008152,GO:0009058,GO:0009698,GO:0009699,GO:0009987,GO:0016491,GO:0016620,GO:0016903,GO:0019438,GO:0019748,GO:0044237,GO:0044249,GO:0044550,GO:0050269,GO:0055114,GO:0071704,GO:1901360,GO:1901362,GO:1901576	1.2.1.3,1.2.1.68	ko:K00128,ko:K12355	ko00010,ko00053,ko00071,ko00280,ko00310,ko00330,ko00340,ko00380,ko00410,ko00561,ko00620,ko00625,ko00903,ko00940,ko00981,ko01100,ko01110,ko01120,ko01130,map00010,map00053,map00071,map00280,map00310,map00330,map00340,map00380,map00410,map00561,map00620,map00625,map00903,map00940,map00981,map01100,map01110,map01120,map01130	M00135	R00264,R00631,R00710,R00904,R01752,R01986,R02549,R02678,R02940,R02957,R03283,R03869,R04065,R04506,R04903,R05050,R05237,R05238,R05286,R05700,R05701,R06366,R07441,R07442,R08146	RC00047,RC00071,RC00080,RC00186,RC00218,RC00242,RC00816,RC01500	ko00000,ko00001,ko00002,ko01000	-	-	-	Aldedh
BPChr05G21038	1.35191	0.00132211	0.0150855	BPChr05G21038	3641.EOX95192	0.0	2135.1	COG1215@1|root,2QQG2@2759|Eukaryota,37IX5@33090|Viridiplantae,3GBT6@35493|Streptophyta	35493|Streptophyta	G	Belongs to the glycosyltransferase 2 family	-	GO:0000030,GO:0000278,GO:0000281,GO:0000910,GO:0000911,GO:0000919,GO:0001101,GO:0003674,GO:0003824,GO:0005575,GO:0005622,GO:0005623,GO:0005737,GO:0005794,GO:0006950,GO:0006970,GO:0007049,GO:0007275,GO:0008150,GO:0008152,GO:0009414,GO:0009415,GO:0009628,GO:0009651,GO:0009987,GO:0010035,GO:0012505,GO:0016043,GO:0016740,GO:0016757,GO:0016758,GO:0019187,GO:0022402,GO:0022607,GO:0032501,GO:0032502,GO:…	2.4.2.24	ko:K00770	ko00520,ko01100,map00520,map01100	-	R03928,R06083	RC00005	ko00000,ko00001,ko01000,ko01003	-	GT2	-	Cellulose_synt,zf-RING_4
BPChr05G21075	1.35118	0.00204317	0.0211877	BPChr05G21075	3983.cassava4.1_005366m	4.1e-215	754.2	COG5064@1|root,KOG0166@2759|Eukaryota,37HJI@33090|Viridiplantae,3GAGW@35493|Streptophyta,4JG2P@91835|fabids	35493|Streptophyta	U	Belongs to the importin alpha family	-	GO:0003674,GO:0005048,GO:0005215,GO:0005488,GO:0005575,GO:0005622,GO:0005623,GO:0005634,GO:0005635,GO:0005643,GO:0005654,GO:0005737,GO:0005829,GO:0006606,GO:0006607,GO:0006810,GO:0006886,GO:0006913,GO:0008104,GO:0008139,GO:0008150,GO:0008565,GO:0012505,GO:0015031,GO:0015833,GO:0017038,GO:0031967,GO:0031974,GO:0031975,GO:0031981,GO:0032991,GO:0033036,GO:0033218,GO:0033365,GO:0034504,GO:0034613,GO:…	-	-	-	-	-	-	-	-	-	-	Arm,Arm_3,IBB
BPChr05G14752	1.35037	0.00104042	0.0124122	BPChr05G14752	3983.cassava4.1_026369m	2.5e-87	328.9	KOG0394@1|root,KOG0394@2759|Eukaryota,37Y48@33090|Viridiplantae,3GGRD@35493|Streptophyta	35493|Streptophyta	U	Ras-related protein	-	-	-	ko:K07897,ko:K07976	ko04137,ko04138,ko04140,ko04144,ko04145,ko05132,ko05146,ko05152,map04137,map04138,map04140,map04144,map04145,map05132,map05146,map05152	-	-	-	ko00000,ko00001,ko04031,ko04131,ko04147	-	-	-	Ras
BPChr12G22315	1.34721	0.000891646	0.010999	BPChr12G22315	29760.VIT_11s0037g00830.t01	5.9e-34	150.2	2E02S@1|root,2S7II@2759|Eukaryota,37WQZ@33090|Viridiplantae,3GM30@35493|Streptophyta	35493|Streptophyta	-	-	-	-	-	-	-	-	-	-	-	-	-	-	-
BPChr11G05742	1.34202	0.0034643	0.0318452	BPChr11G05742	225117.XP_009344538.1	1.9e-112	412.9	28N0B@1|root,2RNNC@2759|Eukaryota,37KKF@33090|Viridiplantae,3GBAH@35493|Streptophyta,4JSRQ@91835|fabids	35493|Streptophyta	S	WAT1-related protein	-	GO:0003674,GO:0005215,GO:0005575,GO:0005622,GO:0005623,GO:0005737,GO:0005886,GO:0005887,GO:0005938,GO:0006810,GO:0007154,GO:0007165,GO:0008150,GO:0009719,GO:0009725,GO:0009733,GO:0009734,GO:0009755,GO:0009987,GO:0010033,GO:0016020,GO:0016021,GO:0022857,GO:0023052,GO:0031224,GO:0031226,GO:0032870,GO:0042221,GO:0044424,GO:0044425,GO:0044444,GO:0044459,GO:0044464,GO:0050789,GO:0050794,GO:0050896,GO:…	-	-	-	-	-	-	-	-	-	-	EamA
BPChr11G03805	1.33901	5.35971e-15	7.09401e-13	BPChr11G03805	3988.XP_002530221.1	8.9e-291	1005.7	COG0364@1|root,KOG0563@2759|Eukaryota,37KIB@33090|Viridiplantae,3GBSZ@35493|Streptophyta,4JDIB@91835|fabids	35493|Streptophyta	G	Catalyzes the rate-limiting step of the oxidative pentose-phosphate pathway, which represents a route for the dissimilation of carbohydrates besides glycolysis	G6PD1	GO:0003674,GO:0003824,GO:0004345,GO:0005575,GO:0005622,GO:0005623,GO:0005737,GO:0005975,GO:0005996,GO:0006006,GO:0006081,GO:0006098,GO:0006139,GO:0006725,GO:0006732,GO:0006733,GO:0006739,GO:0006753,GO:0006793,GO:0006796,GO:0006807,GO:0008150,GO:0008152,GO:0009051,GO:0009117,GO:0009507,GO:0009532,GO:0009536,GO:0009570,GO:0009987,GO:0016491,GO:0016614,GO:0016616,GO:0019318,GO:0019362,GO:0019637,GO:…	1.1.1.363,1.1.1.49	ko:K00036	ko00030,ko00480,ko01100,ko01110,ko01120,ko01130,ko01200,ko05230,map00030,map00480,map01100,map01110,map01120,map01130,map01200,map05230	M00004,M00006,M00008	R00835,R02736,R10907	RC00001,RC00066	ko00000,ko00001,ko00002,ko01000,ko04147	-	-	-	G6PD_C,G6PD_N
BPChr04G03584	1.33865	3.32502e-13	3.72193e-11	BPChr04G03584	3694.POPTR_0015s07650.1	4.3e-85	321.2	28MM5@1|root,2QU4X@2759|Eukaryota,37T9X@33090|Viridiplantae,3GGMI@35493|Streptophyta,4JGD9@91835|fabids	35493|Streptophyta	S	HPP family	-	-	-	-	-	-	-	-	-	-	-	-	HPP
BPChr12G28172	1.33864	0.00250411	0.024865	BPChr12G28172	57918.XP_004303854.1	0.0	1200.7	COG1088@1|root,KOG0747@2759|Eukaryota,37IFD@33090|Viridiplantae,3G720@35493|Streptophyta,4JN59@91835|fabids	35493|Streptophyta	G	rhamnose biosynthetic enzyme	-	GO:0003674,GO:0003824,GO:0005575,GO:0005622,GO:0005623,GO:0005737,GO:0005829,GO:0005911,GO:0006139,GO:0006725,GO:0006793,GO:0006807,GO:0006810,GO:0008150,GO:0008152,GO:0009058,GO:0009225,GO:0009226,GO:0009506,GO:0009812,GO:0009813,GO:0009914,GO:0009966,GO:0009987,GO:0010253,GO:0010280,GO:0010315,GO:0010646,GO:0010817,GO:0010928,GO:0016829,GO:0016835,GO:0016836,GO:0018130,GO:0019438,GO:0023051,GO:…	4.2.1.76	ko:K12450	ko00520,map00520	-	R00293	RC00402	ko00000,ko00001,ko01000	-	-	-	Epimerase,GDP_Man_Dehyd
BPChr05G08719	1.32927	9.38404e-06	0.000242512	BPChr05G08719	3983.cassava4.1_002796m	2e-217	762.3	28KBE@1|root,2QSSE@2759|Eukaryota,37HVQ@33090|Viridiplantae,3GGA4@35493|Streptophyta,4JRMY@91835|fabids	35493|Streptophyta	A	zinc finger CCCH domain-containing protein	-	GO:0003674,GO:0003676,GO:0003723,GO:0003729,GO:0005488,GO:0097159,GO:1901363	-	-	-	-	-	-	-	-	-	-	RRM_1,zf-CCCH
BPChr07G07727	1.32702	2.63702e-08	1.25685e-06	BPChr07G07727	29760.VIT_10s0003g02120.t01	2.8e-167	594.7	COG2801@1|root,KOG0017@2759|Eukaryota,37JY2@33090|Viridiplantae,3GCG5@35493|Streptophyta	35493|Streptophyta	L	Belongs to the 'GDSL' lipolytic enzyme family	-	GO:0002376,GO:0005575,GO:0005576,GO:0005618,GO:0005622,GO:0005623,GO:0005634,GO:0005737,GO:0006950,GO:0006952,GO:0006955,GO:0008150,GO:0009507,GO:0009534,GO:0009536,GO:0009579,GO:0009605,GO:0009607,GO:0009627,GO:0009814,GO:0030312,GO:0031976,GO:0031984,GO:0043207,GO:0043226,GO:0043227,GO:0043229,GO:0043231,GO:0044422,GO:0044424,GO:0044434,GO:0044435,GO:0044444,GO:0044446,GO:0044464,GO:0045087,GO:…	-	-	-	-	-	-	-	-	-	-	Lipase_GDSL
BPChr02G13123	1.32176	8.03341e-08	3.47388e-06	BPChr02G13123	29760.VIT_02s0025g00650.t01	0.0	1189.1	COG0464@1|root,KOG0737@2759|Eukaryota,37IX2@33090|Viridiplantae,3GC4V@35493|Streptophyta	35493|Streptophyta	O	ATPase family	-	GO:0000166,GO:0003674,GO:0003824,GO:0005488,GO:0005524,GO:0005575,GO:0005622,GO:0005623,GO:0005634,GO:0005737,GO:0005739,GO:0005740,GO:0005741,GO:0006605,GO:0006626,GO:0006810,GO:0006839,GO:0006886,GO:0006996,GO:0007005,GO:0008104,GO:0008144,GO:0008150,GO:0009987,GO:0015031,GO:0015833,GO:0016020,GO:0016043,GO:0016462,GO:0016787,GO:0016817,GO:0016818,GO:0016887,GO:0017038,GO:0017076,GO:0017111,GO:…	-	-	-	-	-	-	-	-	-	-	AAA
BPChr02G10571	1.31983	0.00579111	0.0464355	BPChr02G10571	3641.EOY25081	1.2e-279	969.1	COG1215@1|root,2QZE9@2759|Eukaryota,37JEG@33090|Viridiplantae,3GBX0@35493|Streptophyta	35493|Streptophyta	G	Belongs to the glycosyltransferase 2 family	-	GO:0000271,GO:0000278,GO:0000281,GO:0000910,GO:0003674,GO:0003824,GO:0005575,GO:0005622,GO:0005623,GO:0005737,GO:0005794,GO:0005886,GO:0005975,GO:0005976,GO:0006073,GO:0007049,GO:0008150,GO:0008152,GO:0009058,GO:0009059,GO:0009250,GO:0009832,GO:0009833,GO:0009987,GO:0012505,GO:0016020,GO:0016051,GO:0016740,GO:0016757,GO:0016758,GO:0016759,GO:0022402,GO:0030243,GO:0030244,GO:0033692,GO:0034637,GO:…	-	-	-	-	-	-	-	-	-	-	Cellulose_synt
BPChr06G02126	1.31849	0.00217033	0.0222589	BPChr06G02126	3983.cassava4.1_014889m	8.7e-93	346.7	2CNAQ@1|root,2QUV1@2759|Eukaryota,37T8Y@33090|Viridiplantae,3GHFG@35493|Streptophyta,4JNYW@91835|fabids	35493|Streptophyta	K	ZINC FINGER protein	-	GO:0000976,GO:0001067,GO:0001101,GO:0003674,GO:0003676,GO:0003677,GO:0003690,GO:0003700,GO:0005488,GO:0005575,GO:0005622,GO:0005623,GO:0005634,GO:0006355,GO:0008150,GO:0009719,GO:0009725,GO:0009733,GO:0009751,GO:0009889,GO:0009891,GO:0009893,GO:0009987,GO:0010033,GO:0010468,GO:0010556,GO:0010557,GO:0010604,GO:0010628,GO:0014070,GO:0016043,GO:0019219,GO:0019222,GO:0031323,GO:0031325,GO:0031326,GO:…	-	-	-	-	-	-	-	-	-	-	zf-Dof
BPChr08G17006	1.31782	0.00068266	0.00888546	BPChr08G17006	3694.POPTR_0010s17440.1	1.4e-128	465.7	28JEF@1|root,2QPUJ@2759|Eukaryota,37QDG@33090|Viridiplantae,3G7UW@35493|Streptophyta,4JEUT@91835|fabids	35493|Streptophyta	S	at-exp1,atexp1,atexpa1,athexp alpha 1.2,exp1,expa1	EXPA1	GO:0005575,GO:0005618,GO:0005623,GO:0006949,GO:0008150,GO:0009653,GO:0009987,GO:0016020,GO:0030312,GO:0032502,GO:0044464,GO:0048646,GO:0048856,GO:0071944	-	ko:K20628	-	-	-	-	ko00000	-	-	-	DPBB_1,Pollen_allerg_1
BPChr07G12404	1.31781	2.07437e-10	1.4308e-08	BPChr07G12404	3983.cassava4.1_008533m	6.5e-192	676.8	COG0820@1|root,2QSIE@2759|Eukaryota,37IKH@33090|Viridiplantae,3G9VD@35493|Streptophyta,4JIBE@91835|fabids	35493|Streptophyta	H	Dual-specificity RNA methyltransferase	-	-	2.1.1.192	ko:K06941	-	-	-	-	ko00000,ko01000,ko03009	-	-	-	Fer4_14,Radical_SAM
BPChr13G17242	1.31559	6.11676e-05	0.00123273	BPChr13G17242	225117.XP_009364984.1	8.7e-136	490.7	COG0534@1|root,KOG1347@2759|Eukaryota,37RII@33090|Viridiplantae,3GG03@35493|Streptophyta,4JHK3@91835|fabids	35493|Streptophyta	V	Belongs to the multi antimicrobial extrusion (MATE) (TC 2.A.66.1) family	-	GO:0000302,GO:0001101,GO:0003674,GO:0005215,GO:0005342,GO:0005575,GO:0005623,GO:0005886,GO:0006810,GO:0006811,GO:0006812,GO:0006820,GO:0006842,GO:0006855,GO:0006873,GO:0006875,GO:0006879,GO:0006950,GO:0006979,GO:0007154,GO:0008150,GO:0008324,GO:0008509,GO:0008514,GO:0009267,GO:0009605,GO:0009719,GO:0009723,GO:0009725,GO:0009737,GO:0009987,GO:0009991,GO:0010033,GO:0010035,GO:0010038,GO:0010039,GO:…	-	-	-	-	-	-	-	-	-	-	MatE
BPChr03G03319	1.31544	0.002424	0.0242512	BPChr03G03319	57918.XP_004287629.1	1.9e-65	255.4	2BYKQ@1|root,2QT7C@2759|Eukaryota,37JQ7@33090|Viridiplantae,3G9TG@35493|Streptophyta,4JKYT@91835|fabids	35493|Streptophyta	S	Auxin-binding protein	-	GO:0005575,GO:0005576,GO:0005618,GO:0005623,GO:0030312,GO:0044464,GO:0048046,GO:0071944	-	-	-	-	-	-	-	-	-	-	Cupin_1
BPChr05G31773	1.31467	2.42048e-07	9.54018e-06	BPChr05G31773	3641.EOY11930	3.7e-56	225.3	COG0545@1|root,KOG0552@2759|Eukaryota,37U96@33090|Viridiplantae,3GGGB@35493|Streptophyta	35493|Streptophyta	O	Peptidyl-prolyl cis-trans isomerase	-	GO:0005575,GO:0005622,GO:0005623,GO:0005737,GO:0009507,GO:0009536,GO:0043226,GO:0043227,GO:0043229,GO:0043231,GO:0044424,GO:0044444,GO:0044464	-	-	-	-	-	-	-	-	-	-	FKBP_C
BPChr10G21621	1.31437	0.00293112	0.0282012	BPChr10G21621	29760.VIT_16s0050g01650.t01	1.5e-50	206.1	2EHNT@1|root,2S2JE@2759|Eukaryota,37VUY@33090|Viridiplantae,3GJ5R@35493|Streptophyta	35493|Streptophyta	S	Late embryogenesis abundant protein	-	-	-	-	-	-	-	-	-	-	-	-	LEA_2
BPChr06G16458	1.314	6.61512e-06	0.000179728	BPChr06G16458	981085.XP_010105952.1	2.3e-135	488.8	28J02@1|root,2QTYW@2759|Eukaryota,37JBG@33090|Viridiplantae,3G9FE@35493|Streptophyta,4JKKJ@91835|fabids	35493|Streptophyta	K	Domain of unknown function (DUF296)	-	GO:0005575,GO:0005622,GO:0005623,GO:0005634,GO:0043226,GO:0043227,GO:0043229,GO:0043231,GO:0044424,GO:0044464	-	-	-	-	-	-	-	-	-	-	DUF296
BPChr09G20572	1.31278	0.000144759	0.00246153	BPChr09G20572	981085.XP_010096202.1	3.5e-214	751.1	KOG0254@1|root,KOG0254@2759|Eukaryota,37IW9@33090|Viridiplantae,3GC0D@35493|Streptophyta,4JF3H@91835|fabids	35493|Streptophyta	U	Belongs to the major facilitator superfamily. Sugar transporter (TC 2.A.1.1) family	-	GO:0003674,GO:0005215,GO:0005351,GO:0005354,GO:0005355,GO:0005365,GO:0005402,GO:0005575,GO:0005623,GO:0005886,GO:0006810,GO:0006811,GO:0006812,GO:0007275,GO:0008150,GO:0008324,GO:0008643,GO:0008645,GO:0009653,GO:0009791,GO:0010015,GO:0010101,GO:0010102,GO:0010311,GO:0015075,GO:0015077,GO:0015078,GO:0015144,GO:0015145,GO:0015146,GO:0015148,GO:0015149,GO:0015166,GO:0015168,GO:0015291,GO:0015293,GO:…	-	-	-	-	-	-	-	-	-	-	Sugar_tr
BPChr13G02569	1.31267	0.000310418	0.00469921	BPChr13G02569	3760.EMJ10361	1e-175	622.9	COG0561@1|root,2S2R4@2759|Eukaryota,37TJ8@33090|Viridiplantae,3GX7V@35493|Streptophyta,4JEZ3@91835|fabids	35493|Streptophyta	S	Sucrose-6-phosphate phosphohydrolase C-terminal	-	-	3.1.3.24	ko:K07024	ko00500,map00500	-	R00805,R06211	RC00017	ko00000,ko00001,ko01000	-	-	-	S6PP,S6PP_C
BPChr01G25067	1.30795	3.37633e-07	1.30195e-05	BPChr01G25067	2711.XP_006483367.1	1e-19	104.0	28PAW@1|root,2QVY8@2759|Eukaryota,37TG3@33090|Viridiplantae,3GGWW@35493|Streptophyta	35493|Streptophyta	S	superfamily. Protein	-	-	-	-	-	-	-	-	-	-	-	-	-
BPChr06G30358	1.30529	8.35954e-05	0.00157559	BPChr06G30358	3649.evm.model.supercontig_19.166	3e-44	184.9	KOG1632@1|root,KOG1632@2759|Eukaryota,37HHE@33090|Viridiplantae,3GH13@35493|Streptophyta,3HQ8H@3699|Brassicales	35493|Streptophyta	S	PHD finger protein ALFIN-LIKE	-	GO:0001067,GO:0003674,GO:0003676,GO:0003677,GO:0005488,GO:0005515,GO:0005575,GO:0005622,GO:0005623,GO:0005634,GO:0005737,GO:0005829,GO:0035064,GO:0042393,GO:0043226,GO:0043227,GO:0043229,GO:0043231,GO:0043565,GO:0044212,GO:0044424,GO:0044444,GO:0044464,GO:0097159,GO:0140030,GO:0140034,GO:1901363	-	-	-	-	-	-	-	-	-	-	Alfin,PHD
BPChr13G04464	1.30292	1.28385e-05	0.000322014	BPChr13G04464	3983.cassava4.1_010208m	3.7e-167	594.3	2CGU3@1|root,2QR96@2759|Eukaryota,37SWK@33090|Viridiplantae,3G803@35493|Streptophyta,4JJSU@91835|fabids	35493|Streptophyta	S	Protein of unknown function (DUF642)	-	-	-	-	-	-	-	-	-	-	-	-	DUF642
BPChr13G17259	1.30005	0.00430803	0.0374733	BPChr13G17259	3641.EOY17584	7.2e-72	278.5	KOG4658@1|root,KOG4658@2759|Eukaryota,37P43@33090|Viridiplantae,3GF32@35493|Streptophyta	35493|Streptophyta	T	disease resistance	-	GO:0002376,GO:0005575,GO:0005623,GO:0005886,GO:0006950,GO:0006952,GO:0006955,GO:0007154,GO:0007165,GO:0008150,GO:0008219,GO:0009626,GO:0009987,GO:0012501,GO:0016020,GO:0023052,GO:0033554,GO:0034050,GO:0044464,GO:0045087,GO:0050789,GO:0050794,GO:0050896,GO:0051716,GO:0065007,GO:0071944	-	ko:K19613	ko04014,map04014	-	-	-	ko00000,ko00001	-	-	-	NB-ARC,TIR
BPChr11G10185	1.29976	5.94367e-05	0.00120404	BPChr11G10185	3885.XP_007136465.1	3.9e-74	285.0	29J0X@1|root,2RS8X@2759|Eukaryota,37JJZ@33090|Viridiplantae,3GHGD@35493|Streptophyta,4JI8G@91835|fabids	35493|Streptophyta	K	Dof zinc finger protein DOF4.6-like	-	-	-	-	-	-	-	-	-	-	-	-	zf-Dof
BPChr06G16536	1.29797	0.000516351	0.00706937	BPChr06G16536	3641.EOX91388	8.7e-48	196.4	2A593@1|root,2RY92@2759|Eukaryota,37UDB@33090|Viridiplantae,3GIH8@35493|Streptophyta	35493|Streptophyta	-	-	-	-	-	-	-	-	-	-	-	-	-	-	-
BPChr02G00319	1.29492	0.00294893	0.0283025	BPChr02G00319	3983.cassava4.1_023610m	1.4e-85	322.8	KOG4373@1|root,KOG4373@2759|Eukaryota,37R47@33090|Viridiplantae,3GATX@35493|Streptophyta,4JN7Z@91835|fabids	35493|Streptophyta	S	Werner Syndrome-like	-	GO:0003674,GO:0003824,GO:0004518,GO:0004527,GO:0006139,GO:0006725,GO:0006807,GO:0008150,GO:0008152,GO:0008408,GO:0009987,GO:0016787,GO:0016788,GO:0034641,GO:0043170,GO:0044237,GO:0044238,GO:0046483,GO:0071704,GO:0090304,GO:0090305,GO:1901360	-	-	-	-	-	-	-	-	-	-	DNA_pol_A_exo1
BPChr01G13579	1.29394	3.78499e-07	1.43135e-05	BPChr01G13579	3760.EMJ23963	3.9e-160	570.9	COG0596@1|root,KOG4178@2759|Eukaryota,37P84@33090|Viridiplantae,3G9C1@35493|Streptophyta,4JHPE@91835|fabids	35493|Streptophyta	I	Bifunctional epoxide hydrolase 2-like	-	GO:0000287,GO:0001676,GO:0002532,GO:0002538,GO:0002539,GO:0003008,GO:0003013,GO:0003674,GO:0003824,GO:0004301,GO:0005488,GO:0005575,GO:0005622,GO:0005623,GO:0005737,GO:0005777,GO:0005829,GO:0006082,GO:0006629,GO:0006631,GO:0006793,GO:0006796,GO:0006950,GO:0006952,GO:0006954,GO:0007600,GO:0008015,GO:0008150,GO:0008152,GO:0008217,GO:0009987,GO:0016311,GO:0016787,GO:0016788,GO:0016791,GO:0016801,GO:…	-	-	-	-	-	-	-	-	-	-	Abhydrolase_1,Abhydrolase_6
BPChr10G15228	1.29361	0.00174129	0.0187832	BPChr10G15228	3983.cassava4.1_009435m	8.7e-25	120.6	28K72@1|root,2QQGV@2759|Eukaryota,37K50@33090|Viridiplantae,3GAX7@35493|Streptophyta,4JHYH@91835|fabids	35493|Streptophyta	S	Belongs to the 'GDSL' lipolytic enzyme family	-	GO:0003674,GO:0003824,GO:0004553,GO:0004560,GO:0005575,GO:0005618,GO:0005623,GO:0009505,GO:0015928,GO:0016298,GO:0016787,GO:0016788,GO:0016798,GO:0030312,GO:0044464,GO:0071944	3.2.1.51	ko:K01206	ko00511,map00511	-	-	-	ko00000,ko00001,ko01000,ko04147	-	GH29	-	Lipase_GDSL
BPChr07G06554	1.2927	0.000727062	0.00931486	BPChr07G06554	29760.VIT_01s0011g01140.t01	3.2e-255	887.5	COG0531@1|root,KOG1286@2759|Eukaryota,37JG6@33090|Viridiplantae,3G8AX@35493|Streptophyta	35493|Streptophyta	E	cationic amino acid transporter	-	GO:0005575,GO:0005623,GO:0005886,GO:0016020,GO:0044464,GO:0071944	-	ko:K03294,ko:K13865,ko:K13866	-	-	-	-	ko00000,ko02000	2.A.3.2,2.A.3.3,2.A.3.3.5	-	-	AA_permease_2,AA_permease_C
BPChr06G19234	1.2876	0.00246243	0.0245728	BPChr06G19234	57918.XP_004297544.1	1e-228	799.3	KOG0264@1|root,KOG0264@2759|Eukaryota,37M78@33090|Viridiplantae,3GDJ8@35493|Streptophyta,4JT2M@91835|fabids	35493|Streptophyta	B	Histone-binding protein RBBP4 or subunit C of CAF1 complex	-	-	-	ko:K10752	ko04218,map04218	-	-	-	ko00000,ko00001,ko03036	-	-	-	CAF1C_H4-bd,WD40
BPChr11G05631	1.28473	0.00033905	0.00503919	BPChr11G05631	29760.VIT_14s0068g00280.t01	7.1e-46	190.3	2CW3C@1|root,2S4HW@2759|Eukaryota,37WFD@33090|Viridiplantae,3GK5N@35493|Streptophyta	35493|Streptophyta	S	Protein CHLORORESPIRATORY REDUCTION 7	-	GO:0005575,GO:0005622,GO:0005623,GO:0005737,GO:0008150,GO:0009507,GO:0009532,GO:0009536,GO:0009570,GO:0009987,GO:0010275,GO:0016020,GO:0016043,GO:0022607,GO:0034622,GO:0043226,GO:0043227,GO:0043229,GO:0043231,GO:0043933,GO:0044085,GO:0044422,GO:0044424,GO:0044434,GO:0044435,GO:0044444,GO:0044446,GO:0044464,GO:0065003,GO:0071840	-	-	-	-	-	-	-	-	-	-	CRR7
BPChr06G08440	1.28122	0.0012377	0.0143294	BPChr06G08440	28532.XP_010541432.1	3.1e-124	451.1	COG5023@1|root,KOG1375@2759|Eukaryota,37IAA@33090|Viridiplantae,3GEU0@35493|Streptophyta,3HWAH@3699|Brassicales	35493|Streptophyta	Z	Tubulin is the major constituent of microtubules. It binds two moles of GTP, one at an exchangeable site on the beta chain and one at a non-exchangeable site on the alpha chain	-	GO:0005575,GO:0005622,GO:0005623,GO:0005856,GO:0043226,GO:0043228,GO:0043229,GO:0043232,GO:0044424,GO:0044464	-	ko:K07375	ko04145,ko04540,ko05130,map04145,map04540,map05130	-	-	-	ko00000,ko00001,ko03036,ko04147,ko04812	-	-	-	Tubulin,Tubulin_C
BPChr14G27016	1.28083	8.28714e-07	2.88855e-05	BPChr14G27016	29760.VIT_10s0003g02120.t01	2.6e-168	598.2	COG2801@1|root,KOG0017@2759|Eukaryota,37JY2@33090|Viridiplantae,3GCG5@35493|Streptophyta	35493|Streptophyta	L	Belongs to the 'GDSL' lipolytic enzyme family	-	GO:0002376,GO:0005575,GO:0005576,GO:0005618,GO:0005622,GO:0005623,GO:0005634,GO:0005737,GO:0006950,GO:0006952,GO:0006955,GO:0008150,GO:0009507,GO:0009534,GO:0009536,GO:0009579,GO:0009605,GO:0009607,GO:0009627,GO:0009814,GO:0030312,GO:0031976,GO:0031984,GO:0043207,GO:0043226,GO:0043227,GO:0043229,GO:0043231,GO:0044422,GO:0044424,GO:0044434,GO:0044435,GO:0044444,GO:0044446,GO:0044464,GO:0045087,GO:…	-	-	-	-	-	-	-	-	-	-	Lipase_GDSL
BPunChr32994	1.27978	0.000546207	0.0074046	BPunChr32994	2711.XP_006470794.1	3.1e-122	444.5	28K4N@1|root,2QSJ8@2759|Eukaryota,37SDJ@33090|Viridiplantae,3GDKF@35493|Streptophyta	35493|Streptophyta	S	PCTP-like protein	-	-	-	-	-	-	-	-	-	-	-	-	START
BPChr03G29037	1.27948	0.000125539	0.00218789	BPChr03G29037	102107.XP_008224986.1	1.9e-221	775.8	COG0515@1|root,2QUCU@2759|Eukaryota,37MTP@33090|Viridiplantae,3GGQ7@35493|Streptophyta,4JJZA@91835|fabids	35493|Streptophyta	T	Protein STRUBBELIG-RECEPTOR FAMILY 3-like	-	GO:0003674,GO:0003824,GO:0004672,GO:0004674,GO:0004675,GO:0004888,GO:0005575,GO:0005623,GO:0005886,GO:0005911,GO:0006464,GO:0006468,GO:0006793,GO:0006796,GO:0006807,GO:0007154,GO:0007165,GO:0007166,GO:0007167,GO:0007178,GO:0008150,GO:0008152,GO:0009506,GO:0009987,GO:0016020,GO:0016301,GO:0016310,GO:0016740,GO:0016772,GO:0016773,GO:0019199,GO:0019538,GO:0023052,GO:0030054,GO:0036211,GO:0038023,GO:…	-	-	-	-	-	-	-	-	-	-	LRRNT_2,LRR_8,Pkinase_Tyr
BPunChr33688	1.27666	0.00493076	0.0414722	BPunChr33688	102107.XP_008227899.1	6.1e-208	730.7	28NHR@1|root,2QV39@2759|Eukaryota,37QXG@33090|Viridiplantae,3GGE1@35493|Streptophyta,4JMR4@91835|fabids	35493|Streptophyta	K	NAC domain-containing protein	-	GO:0001067,GO:0003674,GO:0003676,GO:0003677,GO:0003700,GO:0005488,GO:0005575,GO:0005622,GO:0005623,GO:0005634,GO:0005737,GO:0006355,GO:0008150,GO:0009314,GO:0009416,GO:0009628,GO:0009642,GO:0009644,GO:0009889,GO:0009891,GO:0009893,GO:0009962,GO:0009987,GO:0010468,GO:0010556,GO:0010557,GO:0010604,GO:0010628,GO:0016043,GO:0019219,GO:0019222,GO:0022411,GO:0030154,GO:0031323,GO:0031325,GO:0031326,GO:…	-	-	-	-	-	-	-	-	-	-	NAM
BPChr11G15545	1.27531	0.000276427	0.00428396	BPChr11G15545	29760.VIT_12s0028g03200.t01	1e-176	626.3	COG0436@1|root,KOG0259@2759|Eukaryota,37MBY@33090|Viridiplantae,3GEUQ@35493|Streptophyta	35493|Streptophyta	E	Aminotransferase	SUR1	GO:0001101,GO:0001558,GO:0001560,GO:0003674,GO:0003824,GO:0004121,GO:0004838,GO:0005575,GO:0005576,GO:0005622,GO:0005623,GO:0005737,GO:0005773,GO:0005829,GO:0006082,GO:0006520,GO:0006570,GO:0006572,GO:0006725,GO:0006766,GO:0006775,GO:0006790,GO:0006807,GO:0006950,GO:0006970,GO:0006972,GO:0007154,GO:0007275,GO:0008150,GO:0008152,GO:0008483,GO:0009056,GO:0009058,GO:0009063,GO:0009072,GO:0009074,GO:…	2.6.1.5,4.4.1.35	ko:K00815,ko:K11819,ko:K21623	ko00130,ko00270,ko00350,ko00360,ko00380,ko00400,ko00401,ko00950,ko00960,ko00966,ko01100,ko01110,ko01130,ko01210,ko01230,map00130,map00270,map00350,map00360,map00380,map00400,map00401,map00950,map00960,map00966,map01100,map01110,map01130,map01210,map01230	M00025,M00034,M00370	R00694,R00734,R02408,R07396,R08170,R08654,R08660,R08667,R08686	RC00006,RC00488,RC00710,RC02265,RC02303	ko00000,ko00001,ko00002,ko01000,ko01007	-	-	-	Aminotran_1_2
BPChr07G22625	1.27316	0.0002617	0.00408156	BPChr07G22625	2711.XP_006467415.1	2.1e-283	981.1	COG2132@1|root,KOG1263@2759|Eukaryota,37I5Z@33090|Viridiplantae,3G7TH@35493|Streptophyta	35493|Streptophyta	Q	L-ascorbate oxidase homolog	-	-	-	-	-	-	-	-	-	-	-	-	Cu-oxidase,Cu-oxidase_2,Cu-oxidase_3
BPChr04G18165	1.2695	6.2002e-14	7.36095e-12	BPChr04G18165	29760.VIT_19s0014g00470.t01	4.2e-295	1020.8	COG4886@1|root,2QVI9@2759|Eukaryota,37Q00@33090|Viridiplantae,3GDP6@35493|Streptophyta	35493|Streptophyta	T	leucine-rich repeat receptor-like serine threonine-protein kinase	-	-	-	-	-	-	-	-	-	-	-	-	LRR_1,LRR_8,Malectin,Pkinase,Pkinase_Tyr
BPChr07G15656	1.2674	0.00273351	0.0266918	BPChr07G15656	3641.EOY28483	0.0	1089.3	COG0515@1|root,2QSUU@2759|Eukaryota,37KBB@33090|Viridiplantae,3G9QG@35493|Streptophyta	35493|Streptophyta	T	Serine threonine-protein kinase	-	-	2.7.11.1	ko:K04733	ko04010,ko04064,ko04620,ko04621,ko04624,ko04722,ko05133,ko05140,ko05142,ko05145,ko05152,ko05162,ko05164,map04010,map04064,map04620,map04621,map04624,map04722,map05133,map05140,map05142,map05145,map05152,map05162,map05164	M00686	-	-	ko00000,ko00001,ko00002,ko01000,ko01001	-	-	-	B_lectin,DUF3403,PAN_2,Pkinase,Pkinase_Tyr,S_locus_glycop
BPChr05G17471	1.2671	0.00398861	0.0354023	BPChr05G17471	225117.XP_009373520.1	4.2e-177	628.2	COG0270@1|root,2QT36@2759|Eukaryota,37SRJ@33090|Viridiplantae,3GF6G@35493|Streptophyta,4JJXG@91835|fabids	35493|Streptophyta	B	Belongs to the class I-like SAM-binding methyltransferase superfamily. C5-methyltransferase family	-	GO:0003674,GO:0003824,GO:0003886,GO:0006139,GO:0006259,GO:0006304,GO:0006305,GO:0006306,GO:0006725,GO:0006807,GO:0006950,GO:0008150,GO:0008152,GO:0008168,GO:0008757,GO:0009008,GO:0009266,GO:0009408,GO:0009628,GO:0009987,GO:0010426,GO:0016740,GO:0016741,GO:0032259,GO:0032776,GO:0033554,GO:0034605,GO:0034641,GO:0043170,GO:0043412,GO:0043414,GO:0044237,GO:0044238,GO:0044260,GO:0044728,GO:0046483,GO:…	2.1.1.37	ko:K00558	ko00270,ko01100,ko05206,map00270,map01100,map05206	M00035	R04858	RC00003,RC00332	ko00000,ko00001,ko00002,ko01000,ko02048,ko03032,ko03036	-	-	-	BAH,Chromo,DNA_methylase
BPChr08G03002	1.26375	4.76556e-06	0.000133552	BPChr08G03002	3760.EMJ24446	1.8e-100	372.5	28N15@1|root,2QTDR@2759|Eukaryota,37QBH@33090|Viridiplantae,3GDFJ@35493|Streptophyta,4JFPZ@91835|fabids	35493|Streptophyta	S	Remorin, C-terminal region	-	-	-	ko:K22455	ko04915,map04915	-	-	-	ko00000,ko00001	-	-	-	Remorin_C
BPChr11G26951	1.26309	4.79105e-05	0.00101462	BPChr11G26951	3760.EMJ16496	8.3e-168	596.7	KOG1339@1|root,KOG1339@2759|Eukaryota,37SZN@33090|Viridiplantae,3GDVP@35493|Streptophyta,4JNKA@91835|fabids	35493|Streptophyta	O	Belongs to the peptidase A1 family	-	-	-	-	-	-	-	-	-	-	-	-	TAXi_C,TAXi_N
BPChr14G27036	1.26185	0.000872909	0.0108293	BPChr14G27036	3641.EOY28624	0.0	1266.9	28MK1@1|root,2QU3P@2759|Eukaryota,37MV7@33090|Viridiplantae,3G9MD@35493|Streptophyta	35493|Streptophyta	K	homeobox-leucine zipper protein	-	GO:0000003,GO:0003006,GO:0003674,GO:0003676,GO:0003677,GO:0003700,GO:0005488,GO:0005575,GO:0005622,GO:0005623,GO:0005634,GO:0006355,GO:0007275,GO:0008150,GO:0008544,GO:0009790,GO:0009791,GO:0009793,GO:0009845,GO:0009888,GO:0009889,GO:0009913,GO:0009987,GO:0010154,GO:0010468,GO:0010556,GO:0019219,GO:0019222,GO:0022414,GO:0030154,GO:0030855,GO:0031323,GO:0031326,GO:0032501,GO:0032502,GO:0043226,GO:…	-	ko:K09338	-	-	-	-	ko00000,ko03000	-	-	-	Homeobox,START
BPChr10G21801	1.26098	0.00211038	0.0217237	BPChr10G21801	3641.EOY34551	1.3e-104	386.3	KOG4361@1|root,KOG4361@2759|Eukaryota,37I8H@33090|Viridiplantae,3G8AF@35493|Streptophyta	35493|Streptophyta	T	BAG family molecular chaperone regulator	-	GO:0000003,GO:0003006,GO:0005575,GO:0005622,GO:0005623,GO:0005737,GO:0005829,GO:0006950,GO:0006970,GO:0007275,GO:0008150,GO:0009266,GO:0009409,GO:0009628,GO:0009651,GO:0009791,GO:0010228,GO:0022414,GO:0032501,GO:0032502,GO:0044424,GO:0044444,GO:0044464,GO:0048608,GO:0048731,GO:0048856,GO:0050896,GO:0061458	-	ko:K09555	ko04141,map04141	-	-	-	ko00000,ko00001,ko03110,ko04131	-	-	-	BAG,ubiquitin
BPChr09G20932	1.26024	7.66792e-05	0.00147551	BPChr09G20932	3988.XP_002529250.1	3.3e-48	198.7	2CHQC@1|root,2S3PR@2759|Eukaryota,37VCR@33090|Viridiplantae,3GJZS@35493|Streptophyta	35493|Streptophyta	-	-	-	-	-	-	-	-	-	-	-	-	-	-	-
BPChr10G26202	1.25923	0.00239889	0.0240737	BPChr10G26202	85681.XP_006446421.1	2e-29	136.7	COG0071@1|root,KOG0710@2759|Eukaryota,37WE9@33090|Viridiplantae,3GJYC@35493|Streptophyta	35493|Streptophyta	O	Belongs to the small heat shock protein (HSP20) family	-	-	-	-	-	-	-	-	-	-	-	-	HSP20
BPChr01G22810	1.25431	0.000595784	0.00796099	BPChr01G22810	3750.XP_008352716.1	3.3e-138	498.4	28IMR@1|root,2QQYP@2759|Eukaryota,37T1X@33090|Viridiplantae,3GB4Q@35493|Streptophyta,4JKDN@91835|fabids	35493|Streptophyta	S	Transferase family	-	GO:0000038,GO:0005575,GO:0005622,GO:0005623,GO:0005634,GO:0005737,GO:0005783,GO:0006082,GO:0006629,GO:0006631,GO:0006633,GO:0007275,GO:0008150,GO:0008152,GO:0008610,GO:0009058,GO:0009555,GO:0009987,GO:0010025,GO:0010166,GO:0012505,GO:0016053,GO:0019752,GO:0032501,GO:0032502,GO:0032787,GO:0042761,GO:0043226,GO:0043227,GO:0043229,GO:0043231,GO:0043436,GO:0044237,GO:0044238,GO:0044249,GO:0044255,GO:…	-	-	-	-	-	-	-	-	-	-	Transferase
BPChr06G31446	1.24947	0.000606401	0.00805342	BPChr06G31446	29760.VIT_13s0067g01500.t01	5.3e-70	271.6	29E48@1|root,2QU3M@2759|Eukaryota,37TC9@33090|Viridiplantae,3GHRJ@35493|Streptophyta	35493|Streptophyta	K	Myb-like DNA-binding domain	-	GO:0003674,GO:0003700,GO:0006355,GO:0008150,GO:0009889,GO:0010468,GO:0010556,GO:0019219,GO:0019222,GO:0031323,GO:0031326,GO:0050789,GO:0050794,GO:0051171,GO:0051252,GO:0060255,GO:0065007,GO:0080090,GO:0140110,GO:1903506,GO:2000112,GO:2001141	-	-	-	-	-	-	-	-	-	-	Myb_DNA-binding
BPChr06G26097	1.24876	0.00242323	0.0242512	BPChr06G26097	3712.Bo4g125590.1	3.5e-67	262.7	COG2453@1|root,KOG1616@1|root,KOG1616@2759|Eukaryota,KOG1716@2759|Eukaryota,37MPD@33090|Viridiplantae,3GFW3@35493|Streptophyta,3HNRS@3699|Brassicales	35493|Streptophyta	GV	Glycogen recognition site of AMP-activated protein kinase	SEX4	GO:0000272,GO:0001871,GO:0003674,GO:0003824,GO:0005488,GO:0005575,GO:0005622,GO:0005623,GO:0005737,GO:0005975,GO:0005976,GO:0005982,GO:0005983,GO:0006073,GO:0006793,GO:0006796,GO:0008150,GO:0008152,GO:0009056,GO:0009057,GO:0009251,GO:0009507,GO:0009532,GO:0009536,GO:0009570,GO:0009987,GO:0016052,GO:0016311,GO:0016787,GO:0016788,GO:0016791,GO:0019203,GO:0030246,GO:0030247,GO:0042578,GO:0043170,GO:…	-	-	-	-	-	-	-	-	-	-	AMPK1_CBM,DSPc
BPChr06G13504	1.24714	7.74245e-05	0.00148693	BPChr06G13504	3988.XP_002516035.1	2.3e-179	635.2	28JPB@1|root,2QRUT@2759|Eukaryota,37T9S@33090|Viridiplantae,3GH2X@35493|Streptophyta,4JS62@91835|fabids	35493|Streptophyta	S	Sulfite exporter TauE/SafE	-	-	-	-	-	-	-	-	-	-	-	-	TauE
BPChr14G27821	1.24491	0.00501041	0.0418011	BPChr14G27821	4006.Lus10022305	1.8e-300	1038.5	28JSW@1|root,2QRW8@2759|Eukaryota,37RZI@33090|Viridiplantae,3GA39@35493|Streptophyta,4JKJA@91835|fabids	35493|Streptophyta	S	Sieve element occlusion N-terminus	-	GO:0003674,GO:0005488,GO:0005515,GO:0008150,GO:0009888,GO:0010087,GO:0010088,GO:0032502,GO:0042802,GO:0042803,GO:0043621,GO:0046983,GO:0048856	-	-	-	-	-	-	-	-	-	-	SEO_C,SEO_N
BPChr06G30700	1.24257	0.000416762	0.0059678	BPChr06G30700	981085.XP_010097336.1	0.0	1406.3	COG0169@1|root,KOG0692@2759|Eukaryota,37I1M@33090|Viridiplantae,3GDN1@35493|Streptophyta,4JT1E@91835|fabids	35493|Streptophyta	E	Bifunctional 3-dehydroquinate dehydratase shikimate dehydrogenase, chloroplastic-like	-	GO:0000003,GO:0003006,GO:0003674,GO:0003824,GO:0004764,GO:0005575,GO:0005622,GO:0005623,GO:0005737,GO:0006082,GO:0007275,GO:0008150,GO:0008152,GO:0009058,GO:0009423,GO:0009507,GO:0009532,GO:0009536,GO:0009570,GO:0009790,GO:0009791,GO:0009793,GO:0009987,GO:0010154,GO:0016053,GO:0016491,GO:0016614,GO:0016616,GO:0019632,GO:0019752,GO:0022414,GO:0032501,GO:0032502,GO:0032787,GO:0043226,GO:0043227,GO:…	1.1.1.25,4.2.1.10	ko:K13832	ko00400,ko01100,ko01110,ko01130,ko01230,map00400,map01100,map01110,map01130,map01230	M00022	R02413,R03084	RC00206,RC00848	ko00000,ko00001,ko00002,ko01000	-	-	-	DHquinase_I,Shikimate_DH,Shikimate_dh_N
BPChr12G25898	1.24134	2.84231e-06	8.51344e-05	BPChr12G25898	981085.XP_010112171.1	3.9e-68	265.4	28P2I@1|root,2QVNY@2759|Eukaryota,37SH4@33090|Viridiplantae,3GD6Z@35493|Streptophyta,4JRKW@91835|fabids	35493|Streptophyta	K	Transcription factor	-	GO:0000003,GO:0003006,GO:0003674,GO:0003700,GO:0005575,GO:0005622,GO:0005623,GO:0005634,GO:0006355,GO:0006950,GO:0007275,GO:0007623,GO:0008150,GO:0009266,GO:0009314,GO:0009409,GO:0009416,GO:0009628,GO:0009639,GO:0009791,GO:0009889,GO:0009908,GO:0010029,GO:0010114,GO:0010154,GO:0010187,GO:0010468,GO:0010556,GO:0019219,GO:0019222,GO:0022414,GO:0031323,GO:0031326,GO:0032501,GO:0032502,GO:0043226,GO:…	-	-	-	-	-	-	-	-	-	-	HLH
BPChr04G24522	1.24022	2.50575e-11	1.9634e-09	BPChr04G24522	29760.VIT_19s0027g00500.t01	4e-107	394.4	COG0012@1|root,KOG1491@2759|Eukaryota,37KV5@33090|Viridiplantae,3GFTS@35493|Streptophyta	35493|Streptophyta	J	Hydrolyzes ATP, and can also hydrolyze GTP with lower efficiency. Has lower affinity for GTP	-	-	-	ko:K19788	-	-	-	-	ko00000,ko03036	-	-	-	MMR_HSR1,YchF-GTPase_C
BPChr07G18942	1.23842	0.00529845	0.0435636	BPChr07G18942	102107.XP_008225157.1	4.5e-141	507.7	28IRN@1|root,2QR2Y@2759|Eukaryota,37NCT@33090|Viridiplantae,3GBEZ@35493|Streptophyta,4JE3K@91835|fabids	35493|Streptophyta	K	NAC domain-containing protein	-	GO:0000075,GO:0000077,GO:0003674,GO:0003676,GO:0003677,GO:0003700,GO:0005488,GO:0005575,GO:0005622,GO:0005623,GO:0005634,GO:0006355,GO:0006950,GO:0006974,GO:0008150,GO:0009314,GO:0009628,GO:0009889,GO:0009891,GO:0009893,GO:0009987,GO:0010212,GO:0010332,GO:0010468,GO:0010556,GO:0010557,GO:0010564,GO:0010604,GO:0010628,GO:0019219,GO:0019222,GO:0031323,GO:0031325,GO:0031326,GO:0031328,GO:0031570,GO:…	-	-	-	-	-	-	-	-	-	-	NAM
BPChr03G02448	1.23502	0.00291535	0.0280771	BPChr03G02448	102107.XP_008242737.1	2.4e-117	428.7	COG1794@1|root,2QU3Q@2759|Eukaryota,37M99@33090|Viridiplantae,3GAXU@35493|Streptophyta,4JJAF@91835|fabids	35493|Streptophyta	M	Asp/Glu/Hydantoin racemase	-	-	-	-	-	-	-	-	-	-	-	-	Asp_Glu_race
BPChr14G09177	1.23166	0.0021916	0.0223833	BPChr14G09177	102107.XP_008218969.1	0.0	2642.8	COG5155@1|root,KOG1849@2759|Eukaryota,37P7Y@33090|Viridiplantae,3GEJW@35493|Streptophyta,4JHMV@91835|fabids	35493|Streptophyta	D	separase	-	GO:0000003,GO:0000278,GO:0000280,GO:0000281,GO:0000902,GO:0000910,GO:0000911,GO:0003006,GO:0003674,GO:0003824,GO:0004175,GO:0004197,GO:0005575,GO:0005622,GO:0005623,GO:0005634,GO:0005737,GO:0005819,GO:0005856,GO:0005874,GO:0006508,GO:0006807,GO:0006810,GO:0006887,GO:0006996,GO:0007049,GO:0007059,GO:0007063,GO:0007275,GO:0008150,GO:0008152,GO:0008233,GO:0008234,GO:0009653,GO:0009790,GO:0009791,GO:…	3.4.22.49	ko:K02365	ko04110,ko04111,ko04113,ko04114,map04110,map04111,map04113,map04114	-	-	-	ko00000,ko00001,ko01000,ko01002,ko03036	-	-	-	Peptidase_C50
BPChr05G08804	1.23055	0.00123019	0.0142508	BPChr05G08804	4113.PGSC0003DMT400051860	5.9e-185	654.4	KOG0167@1|root,KOG0167@2759|Eukaryota,37QQJ@33090|Viridiplantae,3GAJ7@35493|Streptophyta,44P63@71274|asterids	35493|Streptophyta	S	ARM REPEAT PROTEIN INTERACTING WITH ABF2-like	-	GO:0005575,GO:0005622,GO:0005623,GO:0005634,GO:0005654,GO:0005737,GO:0006139,GO:0006259,GO:0006260,GO:0006261,GO:0006275,GO:0006725,GO:0006807,GO:0008150,GO:0008152,GO:0008156,GO:0008285,GO:0009058,GO:0009059,GO:0009889,GO:0009890,GO:0009892,GO:0009987,GO:0010556,GO:0010558,GO:0010605,GO:0019219,GO:0019222,GO:0031261,GO:0031323,GO:0031324,GO:0031326,GO:0031327,GO:0031974,GO:0031981,GO:0032991,GO:…	-	ko:K10523	ko04340,ko04341,map04340,map04341	M00384	-	-	ko00000,ko00001,ko00002,ko04121	-	-	-	Arm,BTB
BPChr09G16325	1.23025	1.73298e-06	5.4931e-05	BPChr09G16325	57918.XP_004304469.1	7.3e-238	829.7	COG0175@1|root,KOG2644@2759|Eukaryota,37N0F@33090|Viridiplantae,3GDZW@35493|Streptophyta,4JDXP@91835|fabids	35493|Streptophyta	EH	Phosphoadenosine phosphosulfate reductase family	-	GO:0003674,GO:0003824,GO:0003919,GO:0005575,GO:0005622,GO:0005623,GO:0005737,GO:0005829,GO:0005886,GO:0006139,GO:0006725,GO:0006732,GO:0006747,GO:0006753,GO:0006793,GO:0006796,GO:0006807,GO:0008150,GO:0008152,GO:0009058,GO:0009108,GO:0009117,GO:0009165,GO:0009987,GO:0016020,GO:0016740,GO:0016772,GO:0016779,GO:0018130,GO:0019438,GO:0019637,GO:0034641,GO:0034654,GO:0042726,GO:0042727,GO:0044237,GO:…	2.7.7.2	ko:K00953	ko00740,ko01100,ko01110,map00740,map01100,map01110	M00125	R00161	RC00002	ko00000,ko00001,ko00002,ko01000	-	-	-	MoCF_biosynth,PAPS_reduct
BPChr06G30544	1.22866	0.000438248	0.00618505	BPChr06G30544	981085.XP_010097336.1	0.0	1406.3	COG0169@1|root,KOG0692@2759|Eukaryota,37I1M@33090|Viridiplantae,3GDN1@35493|Streptophyta,4JT1E@91835|fabids	35493|Streptophyta	E	Bifunctional 3-dehydroquinate dehydratase shikimate dehydrogenase, chloroplastic-like	-	GO:0000003,GO:0003006,GO:0003674,GO:0003824,GO:0004764,GO:0005575,GO:0005622,GO:0005623,GO:0005737,GO:0006082,GO:0007275,GO:0008150,GO:0008152,GO:0009058,GO:0009423,GO:0009507,GO:0009532,GO:0009536,GO:0009570,GO:0009790,GO:0009791,GO:0009793,GO:0009987,GO:0010154,GO:0016053,GO:0016491,GO:0016614,GO:0016616,GO:0019632,GO:0019752,GO:0022414,GO:0032501,GO:0032502,GO:0032787,GO:0043226,GO:0043227,GO:…	1.1.1.25,4.2.1.10	ko:K13832	ko00400,ko01100,ko01110,ko01130,ko01230,map00400,map01100,map01110,map01130,map01230	M00022	R02413,R03084	RC00206,RC00848	ko00000,ko00001,ko00002,ko01000	-	-	-	DHquinase_I,Shikimate_DH,Shikimate_dh_N
BPChr08G10773	1.22447	9.35329e-07	3.20318e-05	BPChr08G10773	29760.VIT_05s0020g04440.t01	1.4e-145	523.5	2CMWC@1|root,2QSD3@2759|Eukaryota,37ISX@33090|Viridiplantae,3GDPJ@35493|Streptophyta	35493|Streptophyta	-	-	-	-	-	-	-	-	-	-	-	-	-	-	-
BPChr06G02200	1.22414	8.44928e-06	0.000220456	BPChr06G02200	3641.EOY27436	5.3e-291	1006.9	KOG0582@1|root,KOG0582@2759|Eukaryota,37K74@33090|Viridiplantae,3G9A3@35493|Streptophyta	35493|Streptophyta	T	serine threonine-protein kinase	-	GO:0001932,GO:0001934,GO:0003674,GO:0003824,GO:0004672,GO:0004674,GO:0005575,GO:0005622,GO:0005623,GO:0005737,GO:0006464,GO:0006468,GO:0006793,GO:0006796,GO:0006807,GO:0006950,GO:0007154,GO:0007165,GO:0007346,GO:0008150,GO:0008152,GO:0009893,GO:0009987,GO:0010562,GO:0010604,GO:0016301,GO:0016310,GO:0016740,GO:0016772,GO:0016773,GO:0019220,GO:0019222,GO:0019538,GO:0023014,GO:0023052,GO:0031098,GO:…	2.7.11.1	ko:K08835	-	-	-	-	ko00000,ko01000,ko01001	-	-	-	Pkinase
BPChr06G02201	1.21981	4.67713e-09	2.5521e-07	BPChr06G02201	3641.EOX91713	3.2e-235	821.2	COG0548@1|root,KOG2436@2759|Eukaryota,37MWE@33090|Viridiplantae,3GCQU@35493|Streptophyta	35493|Streptophyta	E	Amino-acid acetyltransferase	-	-	2.3.1.1	ko:K14682	ko00220,ko01100,ko01110,ko01130,ko01210,ko01230,map00220,map01100,map01110,map01130,map01210,map01230	M00028	R00259	RC00004,RC00064	ko00000,ko00001,ko00002,ko01000	-	-	-	AA_kinase,Acetyltransf_1
BPChr10G04312	1.21758	0.00150807	0.0167185	BPChr10G04312	225117.XP_009352411.1	4.5e-198	697.6	COG3104@1|root,KOG1237@2759|Eukaryota,37KR7@33090|Viridiplantae,3G95B@35493|Streptophyta,4JJYC@91835|fabids	35493|Streptophyta	E	Protein NRT1 PTR FAMILY	-	GO:0003674,GO:0005215,GO:0005575,GO:0005623,GO:0005886,GO:0006810,GO:0006811,GO:0006820,GO:0006821,GO:0006950,GO:0006970,GO:0008150,GO:0008509,GO:0009268,GO:0009605,GO:0009607,GO:0009624,GO:0009628,GO:0009651,GO:0009987,GO:0010447,GO:0010542,GO:0015075,GO:0015103,GO:0015108,GO:0015112,GO:0015291,GO:0015318,GO:0015513,GO:0015562,GO:0015698,GO:0015706,GO:0016020,GO:0022804,GO:0022857,GO:0033554,GO:…	-	ko:K14638	-	-	-	-	ko00000,ko02000	2.A.17.3	-	-	PTR2
BPChr06G09596	1.21425	0.000186777	0.00306686	BPChr06G09596	2711.XP_006485975.1	1.2e-227	796.2	28JBN@1|root,2QRQM@2759|Eukaryota,37MUJ@33090|Viridiplantae,3G73V@35493|Streptophyta	35493|Streptophyta	-	-	-	-	-	-	-	-	-	-	-	-	-	-	-
BPChr07G20232	1.21028	0.00306511	0.0291186	BPChr07G20232	29760.VIT_01s0011g01140.t01	1.3e-286	991.9	COG0531@1|root,KOG1286@2759|Eukaryota,37JG6@33090|Viridiplantae,3G8AX@35493|Streptophyta	35493|Streptophyta	E	cationic amino acid transporter	-	GO:0005575,GO:0005623,GO:0005886,GO:0016020,GO:0044464,GO:0071944	-	ko:K03294,ko:K13865,ko:K13866	-	-	-	-	ko00000,ko02000	2.A.3.2,2.A.3.3,2.A.3.3.5	-	-	AA_permease_2,AA_permease_C
BPChr08G19080	1.20722	1.83425e-05	0.000436057	BPChr08G19080	71139.XP_010025119.1	8.4e-93	347.1	COG5333@1|root,KOG0835@2759|Eukaryota,37HXR@33090|Viridiplantae,3GECK@35493|Streptophyta	35493|Streptophyta	DKL	Belongs to the cyclin family	-	GO:0000079,GO:0000307,GO:0001932,GO:0001934,GO:0003674,GO:0005575,GO:0005622,GO:0005623,GO:0005634,GO:0005911,GO:0006355,GO:0006357,GO:0006950,GO:0006970,GO:0008150,GO:0009506,GO:0009628,GO:0009651,GO:0009889,GO:0009891,GO:0009893,GO:0010468,GO:0010556,GO:0010557,GO:0010562,GO:0010604,GO:0010628,GO:0016538,GO:0019207,GO:0019219,GO:0019220,GO:0019222,GO:0019887,GO:0030054,GO:0030234,GO:0031323,GO:…	-	-	-	-	-	-	-	-	-	-	Cyclin_N
BPChr08G07642	1.20684	9.47166e-10	5.74428e-08	BPChr08G07642	3694.POPTR_0015s13430.1	4.2e-70	271.6	COG0794@1|root,2RC4K@2759|Eukaryota,37J03@33090|Viridiplantae,3GEVW@35493|Streptophyta,4JG54@91835|fabids	35493|Streptophyta	M	arabinose-5-phosphate isomerase activity	-	-	-	-	-	-	-	-	-	-	-	-	-
BPChr11G03777	1.20612	4.97075e-05	0.00104927	BPChr11G03777	3988.XP_002521265.1	4.3e-196	691.0	COG1231@1|root,KOG0029@2759|Eukaryota,37JJV@33090|Viridiplantae,3GB9X@35493|Streptophyta,4JI0M@91835|fabids	35493|Streptophyta	Q	Flavin containing amine oxidoreductase	-	-	-	-	-	-	-	-	-	-	-	-	Amino_oxidase,NAD_binding_8
BPChr07G07507	1.20528	1.55705e-10	1.0816e-08	BPChr07G07507	3641.EOY31255	1.9e-145	522.7	COG3491@1|root,KOG0143@2759|Eukaryota,37SAW@33090|Viridiplantae,3GA4Z@35493|Streptophyta	35493|Streptophyta	Q	Belongs to the iron ascorbate-dependent oxidoreductase family	-	-	-	-	-	-	-	-	-	-	-	-	2OG-FeII_Oxy,DIOX_N
BPChr13G09015	1.19917	3.07885e-09	1.72812e-07	BPChr13G09015	3649.evm.model.supercontig_575.2	4.3e-266	923.7	COG0531@1|root,KOG1286@2759|Eukaryota,37JF4@33090|Viridiplantae,3GX4H@35493|Streptophyta,3HNC0@3699|Brassicales	35493|Streptophyta	E	cationic amino acid transporter	-	GO:0003333,GO:0003674,GO:0005215,GO:0005342,GO:0005575,GO:0005623,GO:0005886,GO:0006810,GO:0006811,GO:0006820,GO:0006865,GO:0008150,GO:0008509,GO:0008514,GO:0009605,GO:0009607,GO:0009624,GO:0015075,GO:0015171,GO:0015318,GO:0015711,GO:0015849,GO:0016020,GO:0022857,GO:0034220,GO:0043207,GO:0044464,GO:0046942,GO:0046943,GO:0050896,GO:0051179,GO:0051234,GO:0051704,GO:0051707,GO:0055085,GO:0071702,GO:…	-	ko:K13863	ko05206,map05206	-	-	-	ko00000,ko00001,ko02000	2.A.3.3.1	-	-	AA_permease_2,AA_permease_C
BPChr06G29578	1.19655	0.00112374	0.0132449	BPChr06G29578	3760.EMJ22258	1.5e-112	412.5	KOG0149@1|root,KOG0149@2759|Eukaryota,37KEQ@33090|Viridiplantae,3GCAG@35493|Streptophyta,4JE7U@91835|fabids	35493|Streptophyta	A	RNA-binding protein	-	GO:0000075,GO:0000077,GO:0000278,GO:0003674,GO:0003676,GO:0003723,GO:0003729,GO:0003730,GO:0005488,GO:0005575,GO:0005622,GO:0005623,GO:0005634,GO:0005737,GO:0005829,GO:0006950,GO:0006974,GO:0006977,GO:0006978,GO:0007049,GO:0007050,GO:0007093,GO:0007154,GO:0007165,GO:0007346,GO:0008150,GO:0008285,GO:0009892,GO:0009893,GO:0009894,GO:0009895,GO:0009987,GO:0010468,GO:0010564,GO:0010604,GO:0010605,GO:…	-	-	-	-	-	-	-	-	-	-	RRM_1
BPChr01G26486	1.19642	5.3153e-09	2.86836e-07	BPChr01G26486	981085.XP_010104433.1	6.1e-46	189.9	2CXQT@1|root,2RZ3M@2759|Eukaryota,37UFE@33090|Viridiplantae,3GJN0@35493|Streptophyta,4JUE1@91835|fabids	35493|Streptophyta	S	Auxin-induced protein	-	-	-	ko:K14488	ko04075,map04075	-	-	-	ko00000,ko00001	-	-	-	Auxin_inducible
BPChr05G31662	1.19637	0.000171953	0.0028594	BPChr05G31662	3988.XP_002519633.1	2.5e-132	478.4	COG3588@1|root,KOG1557@2759|Eukaryota,37KBJ@33090|Viridiplantae,3GDDU@35493|Streptophyta,4JJ9E@91835|fabids	35493|Streptophyta	G	fructose-bisphosphate aldolase	-	GO:0001666,GO:0003674,GO:0003824,GO:0004332,GO:0005575,GO:0005622,GO:0005623,GO:0005737,GO:0005975,GO:0005996,GO:0006006,GO:0006082,GO:0006090,GO:0006091,GO:0006094,GO:0006096,GO:0006139,GO:0006163,GO:0006164,GO:0006165,GO:0006725,GO:0006732,GO:0006733,GO:0006753,GO:0006754,GO:0006757,GO:0006793,GO:0006796,GO:0006807,GO:0006950,GO:0008150,GO:0008152,GO:0009056,GO:0009058,GO:0009108,GO:0009117,GO:…	4.1.2.13	ko:K01623	ko00010,ko00030,ko00051,ko00680,ko00710,ko01100,ko01110,ko01120,ko01130,ko01200,ko01230,map00010,map00030,map00051,map00680,map00710,map01100,map01110,map01120,map01130,map01200,map01230	M00001,M00003,M00165,M00167	R01068,R01070,R01829,R02568	RC00438,RC00439,RC00603,RC00604	ko00000,ko00001,ko00002,ko01000,ko03036,ko04131,ko04147	-	-	-	Glycolytic
BPChr06G19528	1.19573	0.00182153	0.0194029	BPChr06G19528	3988.XP_002517554.1	3.1e-136	491.5	28ISZ@1|root,2QR49@2759|Eukaryota,37PGY@33090|Viridiplantae,3GD71@35493|Streptophyta,4JE48@91835|fabids	35493|Streptophyta	S	Belongs to the NPH3 family	-	-	-	-	-	-	-	-	-	-	-	-	NPH3
BPChr13G21173	1.1946	5.23817e-05	0.00108928	BPChr13G21173	3641.EOY19880	1.7e-154	552.4	COG5347@1|root,KOG1030@1|root,KOG0703@2759|Eukaryota,KOG1030@2759|Eukaryota,37PMM@33090|Viridiplantae,3G8MJ@35493|Streptophyta	35493|Streptophyta	T	ADP-ribosylation factor GTPase-activating protein	-	-	-	ko:K12486	ko04144,map04144	-	-	-	ko00000,ko00001,ko04131	-	-	-	ArfGap,C2
BPChr12G25179	1.19203	0.0037393	0.0336314	BPChr12G25179	2711.XP_006469052.1	1.3e-86	326.6	28IJ9@1|root,2QQW5@2759|Eukaryota,37MMX@33090|Viridiplantae,3G9YQ@35493|Streptophyta	35493|Streptophyta	K	transcription factor	-	GO:0000976,GO:0000977,GO:0001012,GO:0001067,GO:0003674,GO:0003676,GO:0003677,GO:0003682,GO:0003690,GO:0003700,GO:0005488,GO:0005515,GO:0005575,GO:0005622,GO:0005623,GO:0005634,GO:0005737,GO:0005829,GO:0006355,GO:0006810,GO:0006811,GO:0006820,GO:0006913,GO:0006950,GO:0006970,GO:0007154,GO:0007165,GO:0007231,GO:0007275,GO:0008150,GO:0008272,GO:0009267,GO:0009292,GO:0009294,GO:0009555,GO:0009605,GO:…	-	-	-	-	-	-	-	-	-	-	bZIP_1,bZIP_2
BPChr09G06477	1.19197	0.000211697	0.00340471	BPChr09G06477	3760.EMJ26444	0.0	1334.3	COG1472@1|root,2QQ55@2759|Eukaryota,37HXP@33090|Viridiplantae,3G7F4@35493|Streptophyta,4JEHH@91835|fabids	35493|Streptophyta	G	Beta-xylosidase alpha-L-arabinofuranosidase	BXL3	GO:0000272,GO:0002376,GO:0003674,GO:0003824,GO:0004553,GO:0005575,GO:0005576,GO:0005618,GO:0005623,GO:0005975,GO:0005976,GO:0006950,GO:0006952,GO:0006955,GO:0008150,GO:0008152,GO:0009044,GO:0009056,GO:0009057,GO:0009605,GO:0009607,GO:0009627,GO:0009814,GO:0009987,GO:0010383,GO:0010410,GO:0016052,GO:0016787,GO:0016798,GO:0030312,GO:0031221,GO:0031222,GO:0043170,GO:0043207,GO:0044036,GO:0044237,GO:…	3.2.1.37	ko:K15920	ko00520,ko01100,map00520,map01100	-	R01433	RC00467	ko00000,ko00001,ko01000	-	GH3	-	Fn3-like,Glyco_hydro_3,Glyco_hydro_3_C
BPChr14G20652	1.19193	9.26375e-05	0.00171196	BPChr14G20652	981085.XP_010095333.1	9.8e-173	613.2	COG2124@1|root,KOG0156@2759|Eukaryota	2759|Eukaryota	Q	iron ion binding	-	GO:0001666,GO:0002213,GO:0002376,GO:0003674,GO:0003824,GO:0004497,GO:0005575,GO:0005622,GO:0005623,GO:0005737,GO:0005783,GO:0006082,GO:0006629,GO:0006720,GO:0006725,GO:0006790,GO:0006807,GO:0006950,GO:0006952,GO:0006955,GO:0008150,GO:0008152,GO:0008299,GO:0008610,GO:0009058,GO:0009605,GO:0009607,GO:0009617,GO:0009620,GO:0009628,GO:0009682,GO:0009759,GO:0009987,GO:0010035,GO:0010038,GO:0010039,GO:…	1.14.13.53,1.14.13.89,1.14.14.1,1.14.14.19,1.14.14.32	ko:K00512,ko:K00517,ko:K07408,ko:K07418,ko:K13260,ko:K20623	ko00140,ko00380,ko00590,ko00591,ko00830,ko00905,ko00943,ko00980,ko01100,ko01110,ko04212,ko04726,ko04750,ko04913,ko04917,ko04927,ko04934,ko05204,map00140,map00380,map00590,map00591,map00830,map00905,map00943,map00980,map01100,map01110,map04212,map04726,map04750,map04913,map04917,map04927,map04934,map05204	M00109,M00110	R02211,R02354,R02355,R03089,R03408,R03629,R03783,R04852,R04853,R06560,R06561,R06606,R06607,R07000,R07001,R07021,R07022,R07042,R07043,R07044,R07045,R07046,R07048,R07050,R07051,R07052,R07055,R07056,R07079,R07080,R07081,R07085,R07087,R07098,R07099,R07371,R07470,R07474,R07746,R08390,R08392,R08517,R08518,R09418,R09423,R09442	RC00046,RC00607,RC00660,RC00661,RC00704,RC00723,RC00724,RC00923,RC01184,RC01222,RC01444,RC01445,RC01710,RC01711,RC01723,RC01725,RC01727,RC01732,RC01733,RC02531	ko00000,ko00001,ko00002,ko00199,ko01000	-	-	-	p450
BPChr08G01391	1.19158	0.00050174	0.00691181	BPChr08G01391	3760.EMJ15553	0.0	1421.0	COG5059@1|root,KOG4280@2759|Eukaryota,37M26@33090|Viridiplantae,3G7IA@35493|Streptophyta,4JJ9Z@91835|fabids	35493|Streptophyta	Z	Belongs to the TRAFAC class myosin-kinesin ATPase superfamily. Kinesin family	-	GO:0000278,GO:0002376,GO:0002478,GO:0002495,GO:0002504,GO:0003674,GO:0003676,GO:0003677,GO:0003774,GO:0003777,GO:0003824,GO:0005488,GO:0005575,GO:0005622,GO:0005623,GO:0005737,GO:0005813,GO:0005815,GO:0005819,GO:0005829,GO:0005856,GO:0005871,GO:0005873,GO:0005875,GO:0006810,GO:0006890,GO:0006928,GO:0007017,GO:0007018,GO:0007049,GO:0008150,GO:0008283,GO:0008574,GO:0009987,GO:0015630,GO:0016192,GO:…	-	ko:K10400	-	-	-	-	ko00000,ko04812	-	-	-	Kinesin
BPChr11G17783	1.19083	4.57841e-06	0.000129231	BPChr11G17783	29760.VIT_12s0028g01100.t01	2.1e-178	631.7	COG0667@1|root,KOG1575@2759|Eukaryota,37JT5@33090|Viridiplantae,3GFD9@35493|Streptophyta	35493|Streptophyta	C	oxidoreductase At1g06690	-	GO:0005575,GO:0005622,GO:0005623,GO:0005737,GO:0009507,GO:0009526,GO:0009532,GO:0009534,GO:0009535,GO:0009536,GO:0009570,GO:0009579,GO:0009941,GO:0010287,GO:0016020,GO:0031967,GO:0031975,GO:0031976,GO:0031984,GO:0034357,GO:0042651,GO:0043226,GO:0043227,GO:0043229,GO:0043231,GO:0044422,GO:0044424,GO:0044434,GO:0044435,GO:0044436,GO:0044444,GO:0044446,GO:0044464,GO:0055035	-	-	-	-	-	-	-	-	-	-	Aldo_ket_red
BPChr02G23312	1.19024	9.895e-06	0.000254708	BPChr02G23312	3885.XP_007157336.1	1.4e-91	342.4	COG0503@1|root,KOG1712@2759|Eukaryota,37Q7A@33090|Viridiplantae,3GEX4@35493|Streptophyta,4JMA0@91835|fabids	35493|Streptophyta	F	Adenine phosphoribosyltransferase	-	GO:0003674,GO:0003824,GO:0003999,GO:0005575,GO:0005622,GO:0005623,GO:0005737,GO:0006139,GO:0006163,GO:0006164,GO:0006167,GO:0006725,GO:0006753,GO:0006793,GO:0006796,GO:0006807,GO:0008150,GO:0008152,GO:0009058,GO:0009117,GO:0009123,GO:0009124,GO:0009126,GO:0009127,GO:0009150,GO:0009152,GO:0009156,GO:0009161,GO:0009165,GO:0009167,GO:0009168,GO:0009259,GO:0009260,GO:0009308,GO:0009507,GO:0009536,GO:…	2.4.2.7	ko:K00759	ko00230,ko01100,map00230,map01100	-	R00190,R01229,R04378	RC00063	ko00000,ko00001,ko01000,ko04147	-	-	-	Pribosyltran
BPChr11G02086	1.19001	3.41418e-08	1.58861e-06	BPChr11G02086	3847.GLYMA08G29050.5	2.9e-173	615.9	KOG4658@1|root,KOG4658@2759|Eukaryota,37TCP@33090|Viridiplantae,3G9RZ@35493|Streptophyta	35493|Streptophyta	T	Belongs to the disease resistance NB-LRR family	-	-	-	-	-	-	-	-	-	-	-	-	NB-ARC
BPChr06G19503	1.18822	1.58468e-09	9.18412e-08	BPChr06G19503	3641.EOY26604	0.0	2233.0	COG1131@1|root,KOG0065@2759|Eukaryota,37P62@33090|Viridiplantae,3GB0P@35493|Streptophyta	35493|Streptophyta	Q	Belongs to the ABC transporter superfamily. ABCG family. PDR (TC 3.A.1.205) subfamily	-	GO:0000302,GO:0001101,GO:0002229,GO:0002239,GO:0003674,GO:0003824,GO:0005215,GO:0005575,GO:0005623,GO:0005886,GO:0006810,GO:0006811,GO:0006812,GO:0006820,GO:0006855,GO:0006869,GO:0006950,GO:0006952,GO:0006979,GO:0008150,GO:0009605,GO:0009607,GO:0009719,GO:0009723,GO:0009725,GO:0009751,GO:0009753,GO:0010033,GO:0010035,GO:0010193,GO:0010876,GO:0014070,GO:0015399,GO:0015405,GO:0015692,GO:0015711,GO:…	-	-	-	-	-	-	-	-	-	-	ABC2_membrane,ABC_tran,ABC_trans_N,PDR_assoc
BPChr11G17829	1.18792	1.54907e-06	4.99913e-05	BPChr11G17829	29760.VIT_06s0004g07660.t01	1.7e-226	792.3	COG0160@1|root,KOG1404@2759|Eukaryota,37HV3@33090|Viridiplantae,3GGGM@35493|Streptophyta	35493|Streptophyta	E	Belongs to the class-III pyridoxal-phosphate-dependent aminotransferase family	-	-	2.6.1.40,2.6.1.44	ko:K00827	ko00250,ko00260,ko00270,ko00280,ko01100,ko01110,map00250,map00260,map00270,map00280,map01100,map01110	-	R00369,R00372,R02050,R10992	RC00006,RC00008,RC00018,RC00160	ko00000,ko00001,ko01000,ko01007	-	-	-	Aminotran_3
BPChr05G07863	1.18777	0.000822126	0.0103063	BPChr05G07863	3750.XP_008380505.1	1.4e-50	206.5	KOG0320@1|root,KOG0320@2759|Eukaryota,37XNI@33090|Viridiplantae,3GQ5E@35493|Streptophyta,4JUEV@91835|fabids	35493|Streptophyta	O	Zinc finger, C3HC4 type (RING finger)	-	-	-	-	-	-	-	-	-	-	-	-	zf-C3HC4_2
BPChr09G01665	1.18739	8.16727e-09	4.21023e-07	BPChr09G01665	3656.XP_008454443.1	3.1e-138	498.0	KOG4754@1|root,KOG4754@2759|Eukaryota,37ID6@33090|Viridiplantae,3G9NS@35493|Streptophyta,4JMCF@91835|fabids	35493|Streptophyta	G	Phosphoglycerate mutase family	-	GO:0005575,GO:0005622,GO:0005623,GO:0005737,GO:0005829,GO:0044424,GO:0044444,GO:0044464	-	-	-	-	-	-	-	-	-	-	His_Phos_1
BPChr05G22049	1.18415	4.72407e-06	0.000132711	BPChr05G22049	3641.EOY11560	6.3e-92	344.0	28IPX@1|root,2QR10@2759|Eukaryota,37K9U@33090|Viridiplantae,3G9QV@35493|Streptophyta	35493|Streptophyta	-	-	-	-	-	-	-	-	-	-	-	-	-	-	-
BPChr12G26814	1.18035	0.00101987	0.0122365	BPChr12G26814	4432.XP_010263281.1	2.5e-179	635.2	COG0153@1|root,KOG0631@2759|Eukaryota,37KN0@33090|Viridiplantae,3GHHX@35493|Streptophyta	35493|Streptophyta	G	galacturonokinase activity	-	GO:0003674,GO:0003824,GO:0005575,GO:0005622,GO:0005623,GO:0005737,GO:0005829,GO:0005975,GO:0005996,GO:0006063,GO:0006082,GO:0006793,GO:0006796,GO:0008150,GO:0008152,GO:0009987,GO:0016301,GO:0016310,GO:0016740,GO:0016772,GO:0016773,GO:0019586,GO:0019752,GO:0032787,GO:0043436,GO:0044237,GO:0044238,GO:0044262,GO:0044281,GO:0044424,GO:0044444,GO:0044464,GO:0046396,GO:0046835,GO:0047912,GO:0071704	2.7.1.44	ko:K18677,ko:K19347	ko00520,map00520	-	R01980	RC00002,RC00078	ko00000,ko00001,ko01000,ko03036	-	-	-	GHMP_kinases_C,GHMP_kinases_N,GalKase_gal_bdg
BPChr06G30262	1.17474	0.000827355	0.0103626	BPChr06G30262	3760.EMJ07402	5.8e-45	188.3	2A6WB@1|root,2RZMG@2759|Eukaryota,37V22@33090|Viridiplantae,3GIUW@35493|Streptophyta	35493|Streptophyta	S	gpi-anchored protein	-	-	-	-	-	-	-	-	-	-	-	-	-
BPChr08G17003	1.17054	0.000889684	0.0109817	BPChr08G17003	3694.POPTR_0007s13030.1	1.8e-34	151.8	COG5156@1|root,KOG3437@2759|Eukaryota,37REP@33090|Viridiplantae,3GAI6@35493|Streptophyta,4JKSC@91835|fabids	35493|Streptophyta	DO	Component of the anaphase promoting complex cyclosome (APC C), a cell cycle-regulated E3 ubiquitin-protein ligase complex that controls progression through mitosis and the G1 phase of the cell cycle	-	GO:0000151,GO:0000152,GO:0000209,GO:0005575,GO:0005622,GO:0005623,GO:0005634,GO:0005654,GO:0005680,GO:0006275,GO:0006464,GO:0006508,GO:0006511,GO:0006807,GO:0008150,GO:0008152,GO:0008156,GO:0008283,GO:0009056,GO:0009057,GO:0009888,GO:0009889,GO:0009890,GO:0009892,GO:0009893,GO:0009987,GO:0010087,GO:0010498,GO:0010556,GO:0010558,GO:0010564,GO:0010604,GO:0010605,GO:0010948,GO:0016567,GO:0016604,GO:…	-	ko:K03357	ko04110,ko04111,ko04113,ko04114,ko04120,ko04914,ko05166,map04110,map04111,map04113,map04114,map04120,map04914,map05166	M00389	-	-	ko00000,ko00001,ko00002,ko03036,ko04121	-	-	-	ANAPC10
BPChr06G31427	1.16761	0.00580647	0.0465396	BPChr06G31427	102107.XP_008233858.1	3.9e-177	628.2	29HY8@1|root,2RR51@2759|Eukaryota,37JPV@33090|Viridiplantae,3G7CC@35493|Streptophyta,4JNQB@91835|fabids	35493|Streptophyta	S	WEB family protein At2g40480-like	-	GO:0005575,GO:0005622,GO:0005623,GO:0005737,GO:0005829,GO:0006996,GO:0008150,GO:0009657,GO:0009658,GO:0009902,GO:0009903,GO:0009904,GO:0009987,GO:0016043,GO:0019750,GO:0044424,GO:0044444,GO:0044464,GO:0051179,GO:0051234,GO:0051640,GO:0051641,GO:0051644,GO:0051649,GO:0051656,GO:0051667,GO:0071840	-	-	-	-	-	-	-	-	-	-	WEMBL
BPChr07G06552	1.16138	0.00185805	0.0196992	BPChr07G06552	3988.XP_002528146.1	9.8e-151	539.7	KOG2986@1|root,KOG2986@2759|Eukaryota,37IA5@33090|Viridiplantae,3GE6I@35493|Streptophyta,4JKNN@91835|fabids	35493|Streptophyta	S	Mitochondrial translocator assembly and maintenance protein 41 homolog	-	-	-	ko:K17807	-	-	-	-	ko00000,ko03029	-	-	-	Mmp37
BPunChr33589	1.15947	4.17187e-06	0.000118956	BPunChr33589	3641.EOY27454	1.5e-148	532.7	COG0515@1|root,2QUW9@2759|Eukaryota,37KJP@33090|Viridiplantae,3G96G@35493|Streptophyta	35493|Streptophyta	T	LRR receptor-like serine threonine-protein kinase	-	GO:0003674,GO:0003824,GO:0004672,GO:0004674,GO:0005575,GO:0005623,GO:0005886,GO:0006464,GO:0006468,GO:0006793,GO:0006796,GO:0006807,GO:0008150,GO:0008152,GO:0009987,GO:0016020,GO:0016301,GO:0016310,GO:0016740,GO:0016772,GO:0016773,GO:0019538,GO:0036211,GO:0043170,GO:0043412,GO:0044237,GO:0044238,GO:0044260,GO:0044267,GO:0044464,GO:0071704,GO:0071944,GO:0140096,GO:1901564	-	-	-	-	-	-	-	-	-	-	LRR_1,LRR_8,Malectin,Pkinase,Pkinase_Tyr
BPChr14G04159	1.15888	2.24513e-05	0.000519855	BPChr14G04159	2711.XP_006470794.1	3.1e-122	444.5	28K4N@1|root,2QSJ8@2759|Eukaryota,37SDJ@33090|Viridiplantae,3GDKF@35493|Streptophyta	35493|Streptophyta	S	PCTP-like protein	-	-	-	-	-	-	-	-	-	-	-	-	START
BPChr12G24348	1.15705	1.01073e-16	1.54681e-14	BPChr12G24348	102107.XP_008223946.1	6.8e-85	320.5	2AMXX@1|root,2S086@2759|Eukaryota,37V34@33090|Viridiplantae,3GITP@35493|Streptophyta,4JQ30@91835|fabids	35493|Streptophyta	S	zinc-finger of the FCS-type, C2-C2	-	-	-	-	-	-	-	-	-	-	-	-	zf-FLZ
BPChr08G03013	1.15563	1.73253e-07	7.0853e-06	BPChr08G03013	102107.XP_008222009.1	2e-90	339.7	28MUK@1|root,2QUCW@2759|Eukaryota,37HR6@33090|Viridiplantae,3GDMN@35493|Streptophyta,4JDFB@91835|fabids	35493|Streptophyta	S	TPX2 (targeting protein for Xklp2) protein family	-	-	-	-	-	-	-	-	-	-	-	-	TPX2
BPChr11G14280	1.15492	5.15763e-09	2.79869e-07	BPChr11G14280	3983.cassava4.1_004282m	2.6e-154	552.4	28PAW@1|root,2QQB3@2759|Eukaryota,37SRY@33090|Viridiplantae,3GCA4@35493|Streptophyta,4JKGR@91835|fabids	35493|Streptophyta	S	Tetratricopeptide repeat (TPR)-like superfamily protein	-	-	-	-	-	-	-	-	-	-	-	-	TPR_17,TPR_19
BPChr01G13646	1.15386	2.91366e-05	0.000652293	BPChr01G13646	29730.Gorai.011G198100.1	1.1e-23	115.5	2D2TX@1|root,2S4Z1@2759|Eukaryota,37VA6@33090|Viridiplantae,3GJWU@35493|Streptophyta	35493|Streptophyta	S	Belongs to the endosulfine family	-	-	-	-	-	-	-	-	-	-	-	-	Endosulfine
BPChr05G22095	1.1519	6.13541e-06	0.000168565	BPChr05G22095	3885.XP_007163336.1	5e-63	247.3	COG0484@1|root,KOG0714@2759|Eukaryota,37V1N@33090|Viridiplantae,3GIXC@35493|Streptophyta,4JNUR@91835|fabids	35493|Streptophyta	O	DnaJ homolog subfamily B member	-	GO:0005575,GO:0005622,GO:0005623,GO:0005737,GO:0030016,GO:0030017,GO:0030018,GO:0031674,GO:0043226,GO:0043228,GO:0043229,GO:0043232,GO:0043292,GO:0044422,GO:0044424,GO:0044444,GO:0044449,GO:0044464,GO:0099080,GO:0099081,GO:0099512	-	ko:K09509	-	-	-	-	ko00000,ko03110	-	-	-	DnaJ
BPChr01G19034	1.14809	7.75438e-07	2.71736e-05	BPChr01G19034	102107.XP_008223755.1	8.1e-166	590.1	COG0382@1|root,2R0I3@2759|Eukaryota,37KT1@33090|Viridiplantae,3GDHT@35493|Streptophyta,4JEH4@91835|fabids	35493|Streptophyta	H	Homogentisate phytyltransferase 1	HPT1	GO:0003674,GO:0003824,GO:0004659,GO:0005575,GO:0005622,GO:0005623,GO:0005737,GO:0006082,GO:0006629,GO:0006631,GO:0006633,GO:0006636,GO:0006766,GO:0006775,GO:0006810,GO:0008150,GO:0008152,GO:0008610,GO:0008643,GO:0009058,GO:0009110,GO:0009266,GO:0009507,GO:0009536,GO:0009628,GO:0009915,GO:0009987,GO:0010176,GO:0010189,GO:0010232,GO:0010233,GO:0010354,GO:0015766,GO:0015770,GO:0015772,GO:0016043,GO:…	2.5.1.115,2.5.1.116	ko:K09833	ko00130,ko01100,ko01110,map00130,map01100,map01110	M00112	R07500,R10708	RC01840,RC02895	ko00000,ko00001,ko00002,ko01000,ko01006	-	-	-	UbiA
BPChr05G17520	1.14635	0.000427015	0.00607906	BPChr05G17520	3983.cassava4.1_015308m	2.6e-89	336.7	2CXPU@1|root,2RYY8@2759|Eukaryota,37UBD@33090|Viridiplantae,3GHQS@35493|Streptophyta,4JVUR@91835|fabids	35493|Streptophyta	S	GAGA binding protein-like family	-	GO:0003674,GO:0003676,GO:0003677,GO:0005488,GO:0005575,GO:0005622,GO:0005623,GO:0005634,GO:0008150,GO:0009719,GO:0009723,GO:0009725,GO:0010033,GO:0042221,GO:0043226,GO:0043227,GO:0043229,GO:0043231,GO:0043565,GO:0044424,GO:0044464,GO:0050896,GO:0097159,GO:1901363	-	-	-	-	-	-	-	-	-	-	GAGA_bind
BPChr10G03557	1.14565	0.00381401	0.0341504	BPChr10G03557	981085.XP_010109925.1	9.2e-67	260.0	2A3JS@1|root,2RY5H@2759|Eukaryota,37TXV@33090|Viridiplantae,3GI00@35493|Streptophyta,4JPCD@91835|fabids	35493|Streptophyta	S	Late embryogenesis abundant protein	-	-	-	-	-	-	-	-	-	-	-	-	LEA_2
BPChr08G16659	1.14113	0.00197468	0.0206745	BPChr08G16659	3649.evm.model.supercontig_38.19	7.5e-175	620.2	28ITC@1|root,2QR4P@2759|Eukaryota,37IBZ@33090|Viridiplantae,3GBUE@35493|Streptophyta,3HZ8H@3699|Brassicales	35493|Streptophyta	S	Plant protein of unknown function	-	-	-	-	-	-	-	-	-	-	-	-	DUF247
BPChr10G15157	1.1401	6.66997e-05	0.00131978	BPChr10G15157	981085.XP_010102792.1	3.9e-121	441.0	28K4X@1|root,2QR9P@2759|Eukaryota,37PM7@33090|Viridiplantae,3G9H7@35493|Streptophyta,4JFBQ@91835|fabids	35493|Streptophyta	S	GDSL/SGNH-like Acyl-Esterase family found in Pmr5 and Cas1p	-	GO:0003674,GO:0003824,GO:0005575,GO:0005622,GO:0005623,GO:0005737,GO:0005783,GO:0005794,GO:0008150,GO:0008374,GO:0009605,GO:0009607,GO:0009620,GO:0009987,GO:0012505,GO:0016407,GO:0016413,GO:0016740,GO:0016746,GO:0016747,GO:0043207,GO:0043226,GO:0043227,GO:0043229,GO:0043231,GO:0044424,GO:0044444,GO:0044464,GO:0050896,GO:0051704,GO:0051707,GO:0071554	-	-	-	-	-	-	-	-	-	-	PC-Esterase,PMR5N
BPChr07G07509	1.13925	1.15252e-07	4.90799e-06	BPChr07G07509	3641.EOY31255	2.1e-111	409.5	COG3491@1|root,KOG0143@2759|Eukaryota,37SAW@33090|Viridiplantae,3GA4Z@35493|Streptophyta	35493|Streptophyta	Q	Belongs to the iron ascorbate-dependent oxidoreductase family	-	-	-	-	-	-	-	-	-	-	-	-	2OG-FeII_Oxy,DIOX_N
BPChr03G02594	1.13601	0.0054161	0.0441698	BPChr03G02594	57918.XP_004290538.1	6.3e-239	833.2	COG0076@1|root,KOG0629@2759|Eukaryota,37KC0@33090|Viridiplantae,3GB4P@35493|Streptophyta,4JJ80@91835|fabids	35493|Streptophyta	E	Histidine	-	GO:0005575,GO:0005622,GO:0005623,GO:0005737,GO:0005829,GO:0005886,GO:0006066,GO:0006576,GO:0006580,GO:0006807,GO:0008150,GO:0008152,GO:0009308,GO:0009987,GO:0016020,GO:0034308,GO:0034641,GO:0042439,GO:0044106,GO:0044237,GO:0044281,GO:0044424,GO:0044444,GO:0044464,GO:0071704,GO:0071944,GO:0097164,GO:1901160,GO:1901564,GO:1901615	4.1.1.22	ko:K01590	ko00340,ko01100,ko01110,map00340,map01100,map01110	-	R01167	RC00299	ko00000,ko00001,ko01000	-	-	-	Pyridoxal_deC
BPChr02G10493	1.13177	0.000448146	0.00628334	BPChr02G10493	3641.EOY25075	4.4e-219	767.3	COG0304@1|root,KOG1394@2759|Eukaryota,37JJ8@33090|Viridiplantae,3G7B1@35493|Streptophyta	35493|Streptophyta	IQ	Belongs to the beta-ketoacyl-ACP synthases family	-	-	2.3.1.179	ko:K09458	ko00061,ko00780,ko01100,ko01212,map00061,map00780,map01100,map01212	M00083,M00572	R04355,R04726,R04952,R04957,R04960,R04963,R04968,R07762,R10115,R10119	RC00039,RC02728,RC02729,RC02888	ko00000,ko00001,ko00002,ko01000,ko01004	-	-	-	Ketoacyl-synt_C,ketoacyl-synt
BPChr12G25167	1.13026	3.99091e-11	3.0658e-09	BPChr12G25167	264402.Cagra.0796s0018.1.p	0.0	1267.7	COG1404@1|root,2QRC5@2759|Eukaryota,37MCD@33090|Viridiplantae,3GE6Z@35493|Streptophyta,3HW3V@3699|Brassicales	35493|Streptophyta	O	subtilase family	-	GO:0003674,GO:0003824,GO:0004175,GO:0004252,GO:0006508,GO:0006807,GO:0008150,GO:0008152,GO:0008233,GO:0008236,GO:0016787,GO:0017171,GO:0019538,GO:0043170,GO:0044238,GO:0070011,GO:0071704,GO:0140096,GO:1901564	-	-	-	-	-	-	-	-	-	-	Inhibitor_I9,PA,Peptidase_S8
BPChr09G06491	1.12738	1.48907e-05	0.000366449	BPChr09G06491	3760.EMJ10361	1e-175	622.9	COG0561@1|root,2S2R4@2759|Eukaryota,37TJ8@33090|Viridiplantae,3GX7V@35493|Streptophyta,4JEZ3@91835|fabids	35493|Streptophyta	S	Sucrose-6-phosphate phosphohydrolase C-terminal	-	-	3.1.3.24	ko:K07024	ko00500,map00500	-	R00805,R06211	RC00017	ko00000,ko00001,ko01000	-	-	-	S6PP,S6PP_C
BPChr13G24605	1.12681	0.000326922	0.00489234	BPChr13G24605	3641.EOY25583	3.9e-140	504.2	COG2877@1|root,2QQN7@2759|Eukaryota,37HWC@33090|Viridiplantae,3G9Q0@35493|Streptophyta	35493|Streptophyta	M	2-dehydro-3-deoxyphosphooctonate aldolase	-	GO:0000003,GO:0000271,GO:0000902,GO:0000904,GO:0003006,GO:0003674,GO:0003824,GO:0005975,GO:0005976,GO:0005996,GO:0008150,GO:0008152,GO:0008676,GO:0009058,GO:0009059,GO:0009653,GO:0009664,GO:0009826,GO:0009832,GO:0009856,GO:0009860,GO:0009932,GO:0009987,GO:0010306,GO:0010383,GO:0010393,GO:0010396,GO:0016043,GO:0016049,GO:0016051,GO:0016740,GO:0016765,GO:0017144,GO:0022414,GO:0030154,GO:0032501,GO:…	2.5.1.55	ko:K01627	ko00540,ko01100,map00540,map01100	M00063	R03254	RC00435	ko00000,ko00001,ko00002,ko01000,ko01005	-	-	-	DAHP_synth_1
BPChr03G28864	1.12676	0.00109131	0.0129092	BPChr03G28864	3694.POPTR_0018s14920.1	1.4e-188	665.6	KOG2366@1|root,KOG2366@2759|Eukaryota,37MJ5@33090|Viridiplantae,3GCPI@35493|Streptophyta,4JIFA@91835|fabids	35493|Streptophyta	G	alpha-galactosidase	-	-	3.2.1.22	ko:K07407	ko00052,ko00561,ko00600,ko00603,map00052,map00561,map00600,map00603	-	R01101,R01103,R01104,R01194,R01329,R02926,R03634,R04019,R04470,R05549,R05961,R06091	RC00049,RC00059,RC00451	ko00000,ko00001,ko01000	-	-	-	Melibiase_2,Melibiase_2_C
BPChr11G18383	1.1265	0.00152266	0.0168676	BPChr11G18383	3760.EMJ17035	4e-102	377.9	COG1435@1|root,KOG3125@2759|Eukaryota,37HM5@33090|Viridiplantae,3GBIB@35493|Streptophyta,4JF2X@91835|fabids	35493|Streptophyta	F	Thymidine	-	GO:0003674,GO:0003824,GO:0004797,GO:0006139,GO:0006213,GO:0006259,GO:0006725,GO:0006753,GO:0006793,GO:0006796,GO:0006807,GO:0008150,GO:0008152,GO:0009058,GO:0009116,GO:0009117,GO:0009120,GO:0009123,GO:0009124,GO:0009157,GO:0009162,GO:0009165,GO:0009987,GO:0016301,GO:0016310,GO:0016740,GO:0016772,GO:0018130,GO:0019136,GO:0019205,GO:0019206,GO:0019438,GO:0019637,GO:0034641,GO:0034654,GO:0043170,GO:…	2.7.1.21	ko:K00857	ko00240,ko00983,ko01100,map00240,map00983,map01100	-	R01567,R02099,R08233	RC00002,RC00017	ko00000,ko00001,ko01000	-	-	-	TK
BPChr11G14070	1.12178	0.00309628	0.029301	BPChr11G14070	981085.XP_010108821.1	3e-196	691.4	KOG0321@1|root,KOG0321@2759|Eukaryota,37NKS@33090|Viridiplantae,3GGQY@35493|Streptophyta,4JF6X@91835|fabids	35493|Streptophyta	S	Denticleless protein homolog	-	GO:0000075,GO:0000077,GO:0000151,GO:0000209,GO:0000731,GO:0005575,GO:0005622,GO:0005623,GO:0005634,GO:0005813,GO:0005815,GO:0005856,GO:0006139,GO:0006259,GO:0006281,GO:0006301,GO:0006464,GO:0006508,GO:0006511,GO:0006513,GO:0006725,GO:0006807,GO:0006950,GO:0006974,GO:0007154,GO:0007165,GO:0008150,GO:0008152,GO:0009056,GO:0009057,GO:0009058,GO:0009059,GO:0009314,GO:0009411,GO:0009416,GO:0009628,GO:…	-	ko:K11790	-	-	-	-	ko00000,ko04121	-	-	-	WD40
BPChr09G25293	1.11802	1.13056e-05	0.000288742	BPChr09G25293	3750.XP_008391350.1	5.1e-77	295.8	COG0688@1|root,KOG2419@2759|Eukaryota,37JS4@33090|Viridiplantae,3GCZ0@35493|Streptophyta,4JHUS@91835|fabids	35493|Streptophyta	I	Catalyzes the formation of phosphatidylethanolamine (PtdEtn) from phosphatidylserine (PtdSer). Plays a central role in phospholipid metabolism and in the interorganelle trafficking of phosphatidylserine	PSD2	GO:0000325,GO:0003674,GO:0003824,GO:0004609,GO:0005575,GO:0005622,GO:0005623,GO:0005737,GO:0005773,GO:0005774,GO:0005783,GO:0009705,GO:0012505,GO:0016020,GO:0016829,GO:0016830,GO:0016831,GO:0031090,GO:0043226,GO:0043227,GO:0043229,GO:0043231,GO:0044422,GO:0044424,GO:0044437,GO:0044444,GO:0044446,GO:0044464,GO:0098588,GO:0098805	4.1.1.65	ko:K01613	ko00564,ko01100,ko01110,map00564,map01100,map01110	M00093	R02055	RC00299	ko00000,ko00001,ko00002,ko01000	-	-	-	C2,EF-hand_5,EF-hand_8,PS_Dcarbxylase
BPChr06G08456	1.11789	1.77739e-06	5.61627e-05	BPChr06G08456	3983.cassava4.1_003229m	1.2e-298	1031.9	COG0659@1|root,KOG0236@2759|Eukaryota,37RSK@33090|Viridiplantae,3G85B@35493|Streptophyta,4JGWV@91835|fabids	35493|Streptophyta	P	Sulfate transporter	-	GO:0003674,GO:0005215,GO:0005575,GO:0005623,GO:0005886,GO:0005887,GO:0005911,GO:0006810,GO:0006811,GO:0006820,GO:0008150,GO:0008272,GO:0008509,GO:0009506,GO:0015075,GO:0015103,GO:0015116,GO:0015318,GO:0015698,GO:0016020,GO:0016021,GO:0022857,GO:0030054,GO:0031224,GO:0031226,GO:0034220,GO:0044425,GO:0044459,GO:0044464,GO:0051179,GO:0051234,GO:0055044,GO:0055085,GO:0071944,GO:0072348,GO:0098656,GO:…	-	ko:K17471	-	-	-	-	ko00000,ko02000	2.A.53.1	-	-	STAS,Sulfate_transp
BPChr03G04488	1.11509	6.71027e-06	0.00018206	BPChr03G04488	102107.XP_008241925.1	2.2e-158	565.1	COG0631@1|root,KOG0698@2759|Eukaryota,37NN5@33090|Viridiplantae,3GC5C@35493|Streptophyta,4JEQ8@91835|fabids	35493|Streptophyta	T	phosphatase 2c	-	-	3.1.3.16	ko:K14803	-	-	-	-	ko00000,ko01000,ko01009,ko03009	-	-	-	PP2C
BPChr09G25307	1.11497	0.00043435	0.00614775	BPChr09G25307	3983.cassava4.1_022166m	1.2e-13	82.4	COG0688@1|root,KOG2419@2759|Eukaryota,37JS4@33090|Viridiplantae,3GCZ0@35493|Streptophyta,4JHUS@91835|fabids	35493|Streptophyta	I	Catalyzes the formation of phosphatidylethanolamine (PtdEtn) from phosphatidylserine (PtdSer). Plays a central role in phospholipid metabolism and in the interorganelle trafficking of phosphatidylserine	PSD2	GO:0000325,GO:0003674,GO:0003824,GO:0004609,GO:0005575,GO:0005622,GO:0005623,GO:0005737,GO:0005773,GO:0005774,GO:0005783,GO:0009705,GO:0012505,GO:0016020,GO:0016829,GO:0016830,GO:0016831,GO:0031090,GO:0043226,GO:0043227,GO:0043229,GO:0043231,GO:0044422,GO:0044424,GO:0044437,GO:0044444,GO:0044446,GO:0044464,GO:0098588,GO:0098805	4.1.1.65	ko:K01613	ko00564,ko01100,ko01110,map00564,map01100,map01110	M00093	R02055	RC00299	ko00000,ko00001,ko00002,ko01000	-	-	-	C2,EF-hand_5,EF-hand_8,PS_Dcarbxylase
BPChr04G00610	1.11429	0.000218794	0.00350446	BPChr04G00610	4432.XP_010279202.1	7.5e-82	310.8	28IJ9@1|root,2QQW5@2759|Eukaryota,37MMX@33090|Viridiplantae,3G9YQ@35493|Streptophyta	35493|Streptophyta	K	transcription factor	-	GO:0003674,GO:0003700,GO:0005575,GO:0005622,GO:0005623,GO:0005634,GO:0006355,GO:0008150,GO:0009889,GO:0010468,GO:0010556,GO:0019219,GO:0019222,GO:0031323,GO:0031326,GO:0043226,GO:0043227,GO:0043229,GO:0043231,GO:0044424,GO:0044464,GO:0050789,GO:0050794,GO:0051171,GO:0051252,GO:0060255,GO:0065007,GO:0080090,GO:0140110,GO:1903506,GO:2000112,GO:2001141	-	-	-	-	-	-	-	-	-	-	bZIP_1
BPChr06G30921	1.1142	1.98347e-05	0.00046756	BPChr06G30921	29760.VIT_13s0067g02690.t01	2.3e-160	572.0	COG1867@1|root,KOG1253@2759|Eukaryota,37IJZ@33090|Viridiplantae,3GFZ3@35493|Streptophyta	35493|Streptophyta	J	Belongs to the class I-like SAM-binding methyltransferase superfamily. Trm1 family	-	-	2.1.1.215,2.1.1.216	ko:K00555	-	-	-	-	ko00000,ko01000,ko03016	-	-	-	TRM
BPChr14G19648	1.1135	3.45229e-06	0.000101086	BPChr14G19648	3760.EMJ04420	0.0	1464.9	KOG1877@1|root,KOG1877@2759|Eukaryota,37IPM@33090|Viridiplantae,3G8NF@35493|Streptophyta,4JJK3@91835|fabids	35493|Streptophyta	L	isoform X1	-	-	-	ko:K21842	-	-	-	-	ko00000,ko04131	-	-	-	-
BPChr05G26639	1.11215	0.00174747	0.0188291	BPChr05G26639	3847.GLYMA19G34180.1	1.2e-173	616.3	28JID@1|root,2QRT3@2759|Eukaryota,37T8Q@33090|Viridiplantae,3GGCZ@35493|Streptophyta,4JDMB@91835|fabids	35493|Streptophyta	S	Auxin canalisation	-	GO:0003002,GO:0007154,GO:0007165,GO:0007275,GO:0007389,GO:0008150,GO:0009719,GO:0009725,GO:0009733,GO:0009734,GO:0009755,GO:0009888,GO:0009987,GO:0010033,GO:0010051,GO:0010087,GO:0010305,GO:0023052,GO:0032501,GO:0032502,GO:0032870,GO:0042221,GO:0048856,GO:0050789,GO:0050794,GO:0050896,GO:0051716,GO:0065007,GO:0070887,GO:0071310,GO:0071365,GO:0071495	-	-	-	-	-	-	-	-	-	-	Auxin_canalis,PH_2
BPChr05G08840	1.11169	0.000415372	0.00595661	BPChr05G08840	2711.XP_006490951.1	2.1e-151	542.0	COG0604@1|root,KOG1198@2759|Eukaryota,37SG8@33090|Viridiplantae,3GA3Z@35493|Streptophyta	35493|Streptophyta	C	Quinone oxidoreductase-like protein	-	-	1.3.1.105	ko:K18980	-	-	-	-	ko00000,ko01000	-	-	-	ADH_N,ADH_zinc_N_2
BPChr04G24927	1.10873	1.38325e-06	4.52362e-05	BPChr04G24927	3847.GLYMA18G51930.1	5e-170	605.1	KOG4658@1|root,KOG4658@2759|Eukaryota,37TCP@33090|Viridiplantae,3G9RZ@35493|Streptophyta	35493|Streptophyta	T	Belongs to the disease resistance NB-LRR family	-	-	-	-	-	-	-	-	-	-	-	-	NB-ARC
BPChr13G20237	1.10823	7.4293e-06	0.000197199	BPChr13G20237	3885.XP_007143255.1	1.8e-287	996.1	KOG4197@1|root,KOG4197@2759|Eukaryota,37K1K@33090|Viridiplantae,3GFTZ@35493|Streptophyta,4JJJJ@91835|fabids	35493|Streptophyta	S	Pentatricopeptide repeat-containing protein	-	GO:0003674,GO:0003676,GO:0003723,GO:0003824,GO:0004518,GO:0004519,GO:0005488,GO:0005575,GO:0005622,GO:0005623,GO:0006139,GO:0006725,GO:0006807,GO:0008150,GO:0008152,GO:0009451,GO:0009987,GO:0016070,GO:0016787,GO:0016788,GO:0034641,GO:0043170,GO:0043226,GO:0043227,GO:0043229,GO:0043231,GO:0043412,GO:0044237,GO:0044238,GO:0044424,GO:0044464,GO:0046483,GO:0071704,GO:0090304,GO:0090305,GO:0097159,GO:…	-	-	-	-	-	-	-	-	-	-	DYW_deaminase,PPR,PPR_2
BPChr11G05706	1.1075	0.000804169	0.010137	BPChr11G05706	3641.EOY03414	2.3e-87	328.9	KOG0483@1|root,KOG0483@2759|Eukaryota,37J0H@33090|Viridiplantae,3GG5E@35493|Streptophyta	35493|Streptophyta	K	Homeobox-leucine zipper protein	-	GO:0003674,GO:0003676,GO:0003677,GO:0003700,GO:0005488,GO:0005575,GO:0005622,GO:0005623,GO:0005634,GO:0006355,GO:0008150,GO:0009719,GO:0009725,GO:0009733,GO:0009889,GO:0010033,GO:0010468,GO:0010556,GO:0019219,GO:0019222,GO:0031323,GO:0031326,GO:0042221,GO:0043226,GO:0043227,GO:0043229,GO:0043231,GO:0043565,GO:0044424,GO:0044464,GO:0050789,GO:0050794,GO:0050896,GO:0051171,GO:0051252,GO:0060255,GO:…	-	ko:K09338	-	-	-	-	ko00000,ko03000	-	-	-	HALZ,Homeobox
BPChr11G07053	1.10703	0.000154774	0.00260469	BPChr11G07053	29760.VIT_11s0016g03140.t01	1.7e-121	442.6	2CN6Q@1|root,2QU8I@2759|Eukaryota,37RAX@33090|Viridiplantae,3GCHS@35493|Streptophyta	35493|Streptophyta	S	Senescence dehydration-associated protein-related	-	-	-	-	-	-	-	-	-	-	-	-	Senescence
BPChr14G04158	1.10604	0.000806931	0.0101469	BPChr14G04158	4098.XP_009602210.1	1.8e-208	732.3	KOG2532@1|root,KOG2532@2759|Eukaryota,37NN0@33090|Viridiplantae,3GEMK@35493|Streptophyta,44FJ0@71274|asterids	35493|Streptophyta	G	Major Facilitator Superfamily	-	GO:0003674,GO:0005215,GO:0005315,GO:0005575,GO:0005622,GO:0005623,GO:0005737,GO:0006810,GO:0006811,GO:0006820,GO:0008150,GO:0009536,GO:0015291,GO:0015318,GO:0016020,GO:0016021,GO:0022804,GO:0022857,GO:0031224,GO:0034220,GO:0043226,GO:0043227,GO:0043229,GO:0043231,GO:0044424,GO:0044425,GO:0044444,GO:0044464,GO:0051179,GO:0051234,GO:0055085,GO:0098656	-	ko:K08193	-	-	-	-	ko00000,ko02000	2.A.1.14	-	-	MFS_1
BPChr09G09788	1.10155	0.00277842	0.0270241	BPChr09G09788	3983.cassava4.1_011211m	3.4e-106	391.7	2CM7G@1|root,2QPIR@2759|Eukaryota,37NTM@33090|Viridiplantae,3GE14@35493|Streptophyta,4JE52@91835|fabids	35493|Streptophyta	T	Thaumatin-like protein	-	-	-	-	-	-	-	-	-	-	-	-	Thaumatin
BPChr09G11934	1.09781	3.02572e-06	8.98041e-05	BPChr09G11934	29760.VIT_05s0020g04880.t01	1.2e-126	460.3	297RE@1|root,2RERJ@2759|Eukaryota,37R0B@33090|Viridiplantae,3GBDZ@35493|Streptophyta	35493|Streptophyta	S	WVD2-like 1	-	GO:0000226,GO:0000902,GO:0001558,GO:0003674,GO:0005488,GO:0005515,GO:0005575,GO:0005622,GO:0005623,GO:0005737,GO:0005856,GO:0005874,GO:0005881,GO:0005938,GO:0006996,GO:0007010,GO:0007017,GO:0008017,GO:0008092,GO:0008150,GO:0009653,GO:0009826,GO:0009987,GO:0015630,GO:0015631,GO:0016043,GO:0016049,GO:0022603,GO:0022604,GO:0030308,GO:0030863,GO:0030865,GO:0030981,GO:0031122,GO:0032502,GO:0032989,GO:…	-	-	-	-	-	-	-	-	-	-	TPX2
BPChr14G27682	1.09724	1.36925e-12	1.42672e-10	BPChr14G27682	3983.cassava4.1_022973m	2.2e-186	658.7	COG2303@1|root,2QSPJ@2759|Eukaryota,37M7Z@33090|Viridiplantae,3GGRR@35493|Streptophyta,4JN7E@91835|fabids	35493|Streptophyta	E	GMC oxidoreductase	-	-	-	-	-	-	-	-	-	-	-	-	GMC_oxred_C,GMC_oxred_N
BPChr11G03793	1.09666	4.56278e-05	0.000973642	BPChr11G03793	3641.EOX97599	1.5e-278	965.3	28IE1@1|root,2QQQT@2759|Eukaryota,37I8D@33090|Viridiplantae,3GB7N@35493|Streptophyta	35493|Streptophyta	S	Protein of unknown function (DUF632)	-	-	-	-	-	-	-	-	-	-	-	-	DUF630,DUF632
BPChr04G23740	1.09629	0.000114352	0.00203454	BPChr04G23740	3760.EMJ09785	1.2e-176	626.3	KOG1192@1|root,KOG1192@2759|Eukaryota,37M5H@33090|Viridiplantae,3G79K@35493|Streptophyta,4JTB8@91835|fabids	35493|Streptophyta	CG	Belongs to the UDP-glycosyltransferase family	-	GO:0003674,GO:0003824,GO:0005575,GO:0005622,GO:0005623,GO:0008194,GO:0016740,GO:0016757,GO:0016758,GO:0035251,GO:0043226,GO:0043227,GO:0043229,GO:0043231,GO:0044424,GO:0044464,GO:0046527,GO:0080043,GO:0080044	-	-	-	-	-	-	-	-	-	-	UDPGT
BPChr04G18301	1.09594	0.00135287	0.0153365	BPChr04G18301	29760.VIT_19s0027g00340.t01	7.9e-110	404.1	28NR8@1|root,2QVB9@2759|Eukaryota,37Q7B@33090|Viridiplantae,3GG43@35493|Streptophyta	35493|Streptophyta	-	-	-	-	-	-	-	-	-	-	-	-	-	-	-
BPChr03G18617	1.09584	0.00171699	0.0185519	BPChr03G18617	57918.XP_004292375.1	7.8e-89	334.0	28NG4@1|root,2QV1S@2759|Eukaryota,37RQI@33090|Viridiplantae,3G8J5@35493|Streptophyta,4JT93@91835|fabids	35493|Streptophyta	-	-	-	-	-	-	-	-	-	-	-	-	-	-	SNARE_assoc
BPChr10G26211	1.09055	3.29307e-05	0.000729729	BPChr10G26211	2711.XP_006487803.1	0.0	1109.4	COG1472@1|root,2QQ55@2759|Eukaryota,37HYI@33090|Viridiplantae,3G89A@35493|Streptophyta	35493|Streptophyta	G	Lysosomal beta	-	-	3.2.1.21	ko:K01188,ko:K05349	ko00460,ko00500,ko00940,ko01100,ko01110,map00460,map00500,map00940,map01100,map01110	-	R00026,R02558,R02887,R02985,R03527,R04949,R04998,R10035,R10039,R10040	RC00049,RC00059,RC00171,RC00262,RC00397,RC00451,RC00714,RC00746,RC01248	ko00000,ko00001,ko01000	-	GH1,GH3	-	Glyco_hydro_3,Glyco_hydro_3_C
BPChr08G01419	1.08978	0.00409147	0.0360767	BPChr08G01419	29730.Gorai.013G155400.1	9.4e-72	276.9	2C3EN@1|root,2RZR1@2759|Eukaryota,37UZU@33090|Viridiplantae,3GII2@35493|Streptophyta	35493|Streptophyta	-	-	-	-	-	-	-	-	-	-	-	-	-	-	-
BPChr03G13873	1.08882	0.00160973	0.0177052	BPChr03G13873	85681.XP_006430496.1	9.3e-215	753.1	COG0545@1|root,KOG0543@2759|Eukaryota,37PGW@33090|Viridiplantae,3GDE3@35493|Streptophyta	35493|Streptophyta	O	peptidylprolyl	-	GO:0000413,GO:0003674,GO:0003755,GO:0003824,GO:0005488,GO:0005527,GO:0005528,GO:0005575,GO:0005622,GO:0005623,GO:0005737,GO:0005773,GO:0006457,GO:0006464,GO:0006807,GO:0006950,GO:0008144,GO:0008150,GO:0008152,GO:0009266,GO:0009408,GO:0009628,GO:0009987,GO:0010286,GO:0016853,GO:0016859,GO:0018193,GO:0018208,GO:0019538,GO:0033554,GO:0034605,GO:0036211,GO:0043170,GO:0043226,GO:0043227,GO:0043229,GO:…	5.2.1.8	ko:K09571	ko04915,map04915	-	-	-	ko00000,ko00001,ko01000,ko03110	-	-	-	FKBP_C,TPR_1,TPR_2
BPChr06G16581	1.08813	0.00150068	0.0166743	BPChr06G16581	3983.cassava4.1_030831m	3.8e-144	517.7	COG5147@1|root,KOG0048@2759|Eukaryota,37KBM@33090|Viridiplantae,3GBG4@35493|Streptophyta,4JF0I@91835|fabids	35493|Streptophyta	K	Transcription factor	-	GO:0000981,GO:0000988,GO:0000989,GO:0001067,GO:0001076,GO:0001101,GO:0001134,GO:0001135,GO:0003674,GO:0003676,GO:0003677,GO:0003700,GO:0005488,GO:0005575,GO:0005622,GO:0005623,GO:0005634,GO:0006355,GO:0006357,GO:0008150,GO:0009719,GO:0009725,GO:0009751,GO:0009753,GO:0009889,GO:0009909,GO:0009987,GO:0010033,GO:0010468,GO:0010556,GO:0014070,GO:0019219,GO:0019222,GO:0030154,GO:0031323,GO:0031326,GO:…	-	ko:K09422	-	-	-	-	ko00000,ko03000	-	-	-	Myb_DNA-binding
BPChr11G18749	1.08729	0.000250129	0.00392926	BPChr11G18749	102107.XP_008227932.1	0.0	1324.3	COG5218@1|root,KOG2025@2759|Eukaryota,37PWK@33090|Viridiplantae,3G9X3@35493|Streptophyta,4JNBK@91835|fabids	35493|Streptophyta	BD	Condensin complex subunit	-	-	-	ko:K06678	ko04111,map04111	-	-	-	ko00000,ko00001,ko03036	-	-	-	Cnd3
BPChr06G30448	1.08596	0.00529951	0.0435636	BPChr06G30448	981085.XP_010108371.1	8.1e-39	166.8	2BJ9Y@1|root,2S1FS@2759|Eukaryota,37VMY@33090|Viridiplantae,3GJNC@35493|Streptophyta,4JQCI@91835|fabids	35493|Streptophyta	S	expressed protein	-	-	-	-	-	-	-	-	-	-	-	-	-
BPChr01G00071	1.08557	0.00091545	0.011222	BPChr01G00071	102107.XP_008223550.1	3.1e-35	155.6	KOG0800@1|root,KOG0800@2759|Eukaryota,37WER@33090|Viridiplantae,3GK8V@35493|Streptophyta,4JQMA@91835|fabids	35493|Streptophyta	O	RING-H2 finger protein	-	GO:0003674,GO:0003824,GO:0004842,GO:0006464,GO:0006508,GO:0006511,GO:0006807,GO:0008150,GO:0008152,GO:0009056,GO:0009057,GO:0009987,GO:0010033,GO:0010200,GO:0010243,GO:0010498,GO:0016567,GO:0016740,GO:0019538,GO:0019787,GO:0019941,GO:0030163,GO:0032446,GO:0036211,GO:0042221,GO:0042493,GO:0043161,GO:0043170,GO:0043412,GO:0043632,GO:0044237,GO:0044238,GO:0044248,GO:0044257,GO:0044260,GO:0044265,GO:…	2.3.2.27	ko:K19041	-	-	-	-	ko00000,ko01000,ko04121	-	-	-	zf-RING_2
BPChr14G12724	1.0839	0.0020267	0.0210728	BPChr14G12724	3656.XP_008457259.1	1.9e-206	725.3	28IFX@1|root,2QQST@2759|Eukaryota,37PEI@33090|Viridiplantae,3GCC1@35493|Streptophyta,4JMBV@91835|fabids	35493|Streptophyta	S	heparanase-like protein	-	GO:0003674,GO:0003824,GO:0004553,GO:0004566,GO:0005575,GO:0005618,GO:0005623,GO:0009505,GO:0016787,GO:0016798,GO:0030312,GO:0044464,GO:0071944	3.2.1.166	ko:K07964	ko00531,ko01100,ko05205,map00531,map01100,map05205	M00078	R07811	-	ko00000,ko00001,ko00002,ko00536,ko01000	-	GH79	-	Glyco_hydro_79n
BPChr04G24519	1.07761	1.90998e-07	7.7463e-06	BPChr04G24519	3641.EOY04421	1.5e-230	805.4	KOG0594@1|root,KOG0594@2759|Eukaryota,37I1U@33090|Viridiplantae,3G7VD@35493|Streptophyta	35493|Streptophyta	T	Serine threonine-protein kinase STN8	-	GO:0003674,GO:0003824,GO:0004672,GO:0005575,GO:0005622,GO:0005623,GO:0005737,GO:0006464,GO:0006468,GO:0006793,GO:0006796,GO:0006807,GO:0008150,GO:0008152,GO:0009507,GO:0009536,GO:0009579,GO:0009987,GO:0010109,GO:0016301,GO:0016310,GO:0016740,GO:0016772,GO:0016773,GO:0019222,GO:0019538,GO:0031323,GO:0036211,GO:0042548,GO:0042549,GO:0043170,GO:0043226,GO:0043227,GO:0043229,GO:0043231,GO:0043412,GO:…	-	-	-	-	-	-	-	-	-	-	Pkinase
BPChr14G27694	1.07649	0.00454967	0.0389185	BPChr14G27694	29760.VIT_09s0002g08640.t01	1.9e-153	550.4	COG4886@1|root,2QPYS@2759|Eukaryota,37Q18@33090|Viridiplantae,3GA2W@35493|Streptophyta	35493|Streptophyta	T	Belongs to the protein kinase superfamily. Ser Thr protein kinase family	-	-	2.7.11.1	ko:K04733,ko:K13420	ko04010,ko04016,ko04064,ko04620,ko04621,ko04624,ko04626,ko04722,ko05133,ko05140,ko05142,ko05145,ko05152,ko05162,ko05164,map04010,map04016,map04064,map04620,map04621,map04624,map04626,map04722,map05133,map05140,map05142,map05145,map05152,map05162,map05164	M00686	-	-	ko00000,ko00001,ko00002,ko01000,ko01001	-	-	-	LRRNT_2,LRR_1,LRR_8,Pkinase,Pkinase_Tyr
BPChr04G23775	1.07416	0.00127782	0.0146811	BPChr04G23775	3760.EMJ10303	3.2e-214	752.3	COG0123@1|root,KOG1342@2759|Eukaryota,37PTI@33090|Viridiplantae,3GE40@35493|Streptophyta,4JK3N@91835|fabids	35493|Streptophyta	B	Belongs to the histone deacetylase family. HD Type 1 subfamily	-	GO:0000003,GO:0001101,GO:0003006,GO:0003674,GO:0003824,GO:0004407,GO:0005575,GO:0005622,GO:0005623,GO:0005634,GO:0005737,GO:0006325,GO:0006464,GO:0006476,GO:0006807,GO:0006950,GO:0006970,GO:0006996,GO:0007275,GO:0008150,GO:0008152,GO:0009507,GO:0009526,GO:0009536,GO:0009553,GO:0009628,GO:0009651,GO:0009719,GO:0009725,GO:0009737,GO:0009790,GO:0009791,GO:0009793,GO:0009845,GO:0009892,GO:0009941,GO:…	3.5.1.98	ko:K06067	ko04110,ko04213,ko04330,ko04919,ko05016,ko05034,ko05165,ko05169,ko05200,ko05202,ko05203,ko05220,map04110,map04213,map04330,map04919,map05016,map05034,map05165,map05169,map05200,map05202,map05203,map05220	-	-	-	ko00000,ko00001,ko01000,ko03036	-	-	-	Hist_deacetyl
BPChr11G26312	1.07178	0.00484213	0.0408143	BPChr11G26312	29760.VIT_18s0089g01010.t01	3.8e-273	947.2	COG3104@1|root,KOG1947@1|root,KOG1237@2759|Eukaryota,KOG1947@2759|Eukaryota,37P3M@33090|Viridiplantae,3GBJZ@35493|Streptophyta	35493|Streptophyta	E	Protein NRT1 PTR FAMILY	-	GO:0005575,GO:0005623,GO:0005886,GO:0016020,GO:0044464,GO:0071944	-	ko:K14638	-	-	-	-	ko00000,ko02000	2.A.17.3	-	-	PTR2
BPChr11G17833	1.07131	5.14463e-07	1.89077e-05	BPChr11G17833	3694.POPTR_0019s15170.1	5.2e-107	394.0	2AIJ0@1|root,2RZ4X@2759|Eukaryota,37UIZ@33090|Viridiplantae,3GJ5Y@35493|Streptophyta,4JSYP@91835|fabids	35493|Streptophyta	S	Alpha/beta hydrolase family	-	GO:0003674,GO:0003824,GO:0006082,GO:0006725,GO:0006807,GO:0007275,GO:0008150,GO:0008152,GO:0009683,GO:0009850,GO:0009987,GO:0010817,GO:0016787,GO:0016788,GO:0019752,GO:0032501,GO:0032502,GO:0032787,GO:0033473,GO:0034641,GO:0034754,GO:0042430,GO:0042445,GO:0043436,GO:0044237,GO:0044281,GO:0046483,GO:0048367,GO:0048731,GO:0048856,GO:0052689,GO:0065007,GO:0065008,GO:0071704,GO:0080030,GO:1901360,GO:…	-	-	-	-	-	-	-	-	-	-	Abhydrolase_1,Abhydrolase_6
BPChr08G03009	1.07072	0.00506365	0.0421197	BPChr08G03009	57918.XP_004310010.1	2.3e-117	428.7	COG0300@1|root,2QSBK@2759|Eukaryota,37QRQ@33090|Viridiplantae,3GHHK@35493|Streptophyta,4JGDB@91835|fabids	35493|Streptophyta	Q	Belongs to the short-chain dehydrogenases reductases (SDR) family	-	-	1.1.1.330,1.1.1.62	ko:K10251	ko00062,ko00140,ko01040,ko01100,ko01110,ko01212,map00062,map00140,map01040,map01100,map01110,map01212	M00415	R02352,R02353,R04681,R04682,R07759,R08945,R08980,R10826	RC00029,RC00103,RC00127,RC00261	ko00000,ko00001,ko00002,ko01000,ko01004	-	-	-	adh_short
BPChr05G14657	1.06962	0.000188731	0.00309636	BPChr05G14657	981085.XP_010088933.1	1.5e-127	463.0	2CCVI@1|root,2QT6X@2759|Eukaryota,37K4H@33090|Viridiplantae,3G7XA@35493|Streptophyta,4JI05@91835|fabids	35493|Streptophyta	K	Transcription factor	-	GO:0003674,GO:0003676,GO:0003677,GO:0003700,GO:0005488,GO:0005575,GO:0005622,GO:0005623,GO:0005634,GO:0006139,GO:0006351,GO:0006355,GO:0006725,GO:0006807,GO:0008150,GO:0008152,GO:0009058,GO:0009059,GO:0009314,GO:0009416,GO:0009628,GO:0009637,GO:0009889,GO:0009909,GO:0009911,GO:0009987,GO:0010467,GO:0010468,GO:0010556,GO:0016070,GO:0018130,GO:0019219,GO:0019222,GO:0019438,GO:0031323,GO:0031326,GO:…	-	-	-	-	-	-	-	-	-	-	HLH
BPChr12G11478	1.06731	1.53952e-07	6.4029e-06	BPChr12G11478	3750.XP_008342522.1	0.0	1250.3	COG0296@1|root,KOG0470@2759|Eukaryota,37S5X@33090|Viridiplantae,3G7TQ@35493|Streptophyta,4JMQC@91835|fabids	35493|Streptophyta	G	Isoamylase 3	ISA3	GO:0000272,GO:0003674,GO:0003824,GO:0004133,GO:0004553,GO:0005575,GO:0005622,GO:0005623,GO:0005737,GO:0005975,GO:0005976,GO:0005977,GO:0005982,GO:0005983,GO:0006073,GO:0006091,GO:0006112,GO:0006996,GO:0008150,GO:0008152,GO:0009056,GO:0009057,GO:0009251,GO:0009501,GO:0009507,GO:0009532,GO:0009536,GO:0009569,GO:0009570,GO:0009657,GO:0009660,GO:0009987,GO:0015980,GO:0016043,GO:0016052,GO:0016787,GO:…	3.2.1.68	ko:K01214	ko00500,ko01100,ko01110,map00500,map01100,map01110	M00565	R09995,R11261	-	ko00000,ko00001,ko00002,ko01000	-	CBM48,GH13	-	Alpha-amylase,CBM_48
BPChr01G16864	1.0656	1.67531e-05	0.000404159	BPChr01G16864	3983.cassava4.1_015657m	1.2e-94	352.8	COG0545@1|root,KOG0552@2759|Eukaryota,37IUP@33090|Viridiplantae,3G9MM@35493|Streptophyta,4JIYE@91835|fabids	35493|Streptophyta	O	Peptidyl-prolyl cis-trans isomerase	-	GO:0000413,GO:0003674,GO:0003755,GO:0003824,GO:0005488,GO:0005527,GO:0005528,GO:0005575,GO:0005622,GO:0005623,GO:0005737,GO:0006457,GO:0006464,GO:0006807,GO:0008144,GO:0008150,GO:0008152,GO:0009507,GO:0009536,GO:0009579,GO:0009987,GO:0016853,GO:0016859,GO:0018193,GO:0018208,GO:0019538,GO:0031977,GO:0036211,GO:0043170,GO:0043226,GO:0043227,GO:0043229,GO:0043231,GO:0043412,GO:0044237,GO:0044238,GO:…	5.2.1.8	ko:K01802	-	-	-	-	ko00000,ko01000	-	-	-	FKBP_C
BPChr14G12708	1.06467	0.000391667	0.00568744	BPChr14G12708	3694.POPTR_0001s47110.1	4.6e-74	284.3	COG2971@1|root,KOG1794@2759|Eukaryota,37RJH@33090|Viridiplantae,3GBAE@35493|Streptophyta,4JF1R@91835|fabids	35493|Streptophyta	G	N-acetyl-D-glucosamine kinase-like	-	-	-	-	-	-	-	-	-	-	-	-	BcrAD_BadFG
BPChr11G10139	1.06459	5.98548e-06	0.00016514	BPChr11G10139	3885.XP_007132627.1	7.7e-114	416.8	COG5066@1|root,KOG0439@2759|Eukaryota,37I2H@33090|Viridiplantae,3G7AY@35493|Streptophyta,4JDCS@91835|fabids	35493|Streptophyta	U	Vesicle-associated protein	-	-	-	-	-	-	-	-	-	-	-	-	Motile_Sperm
BPChr02G10523	1.06405	0.00545079	0.044342	BPChr02G10523	3641.EOX97826	9e-50	202.6	2CXQT@1|root,2RZ3M@2759|Eukaryota,37UFE@33090|Viridiplantae,3GJN0@35493|Streptophyta	35493|Streptophyta	S	auxin-induced protein	-	-	-	ko:K14488	ko04075,map04075	-	-	-	ko00000,ko00001	-	-	-	Auxin_inducible
BPChr07G18809	1.06256	0.000473985	0.00659438	BPChr07G18809	3649.evm.model.supercontig_373.3	3.5e-45	187.6	2CY0K@1|root,2S158@2759|Eukaryota,37V6S@33090|Viridiplantae,3GJGQ@35493|Streptophyta,3HUAC@3699|Brassicales	35493|Streptophyta	S	Dormancy/auxin associated protein	-	GO:0008150,GO:0009743,GO:0009744,GO:0009746,GO:0009749,GO:0009750,GO:0010033,GO:0034284,GO:0034285,GO:0042221,GO:0050896,GO:1901700	-	-	-	-	-	-	-	-	-	-	Auxin_repressed
BPChr10G03515	1.06215	0.000708747	0.00915204	BPChr10G03515	3983.cassava4.1_007774m	1.2e-220	772.3	2CN02@1|root,2QT1H@2759|Eukaryota,37J8R@33090|Viridiplantae,3G8VN@35493|Streptophyta,4JIZX@91835|fabids	35493|Streptophyta	S	ACT domain	-	GO:0003674,GO:0005488,GO:0006355,GO:0006464,GO:0006807,GO:0006808,GO:0007154,GO:0007584,GO:0008150,GO:0008152,GO:0009605,GO:0009719,GO:0009889,GO:0009891,GO:0009893,GO:0009987,GO:0009991,GO:0010033,GO:0010243,GO:0010468,GO:0010556,GO:0010557,GO:0010604,GO:0010628,GO:0016597,GO:0018175,GO:0018177,GO:0019219,GO:0019222,GO:0019538,GO:0031323,GO:0031325,GO:0031326,GO:0031328,GO:0031406,GO:0031667,GO:…	-	-	-	-	-	-	-	-	-	-	ACT,ACT_6
BPChr13G00826	1.06183	6.54566e-07	2.34411e-05	BPChr13G00826	3983.cassava4.1_008132m	2.3e-208	731.5	KOG1339@1|root,KOG1339@2759|Eukaryota,37RW1@33090|Viridiplantae,3GH16@35493|Streptophyta,4JDGY@91835|fabids	35493|Streptophyta	O	Belongs to the peptidase A1 family	-	-	3.4.23.25	ko:K01381	ko04138,map04138	-	-	-	ko00000,ko00001,ko01000,ko01002	-	-	-	TAXi_C,TAXi_N
BPChr06G02160	1.06078	0.00615943	0.0488292	BPChr06G02160	2711.XP_006491017.1	4.4e-134	485.0	KOG1363@1|root,KOG1363@2759|Eukaryota,37ST6@33090|Viridiplantae,3GHGW@35493|Streptophyta	35493|Streptophyta	T	UBX domain-containing protein	-	-	-	ko:K18726	-	-	-	-	ko00000,ko03019	-	-	-	UBA_4,UBX,UIM
BPChr11G10171	1.06012	0.000197784	0.00320993	BPChr11G10171	3659.XP_004163695.1	1.1e-30	139.4	2CDH5@1|root,2S4BX@2759|Eukaryota,37W5C@33090|Viridiplantae,3GK3Y@35493|Streptophyta,4JQFV@91835|fabids	35493|Streptophyta	S	Protein of unknown function (DUF1138)	OZS	-	-	-	-	-	-	-	-	-	-	-	DUF1138
BPChr11G05659	1.05982	1.68866e-05	0.000406826	BPChr11G05659	3983.cassava4.1_029581m	3.3e-107	395.2	COG5147@1|root,KOG0048@2759|Eukaryota,37KBH@33090|Viridiplantae,3G7RN@35493|Streptophyta,4JMTA@91835|fabids	35493|Streptophyta	K	transcription	-	GO:0000003,GO:0000981,GO:0000988,GO:0000989,GO:0001067,GO:0001076,GO:0001101,GO:0001134,GO:0001135,GO:0003006,GO:0003674,GO:0003676,GO:0003677,GO:0003700,GO:0005488,GO:0005575,GO:0005622,GO:0005623,GO:0005634,GO:0006355,GO:0006357,GO:0007275,GO:0008150,GO:0009314,GO:0009411,GO:0009416,GO:0009555,GO:0009628,GO:0009719,GO:0009725,GO:0009751,GO:0009753,GO:0009791,GO:0009889,GO:0009890,GO:0009892,GO:…	-	ko:K09422	-	-	-	-	ko00000,ko03000	-	-	-	Myb_DNA-binding
BPChr06G25244	1.05889	0.00444222	0.0382163	BPChr06G25244	29760.VIT_09s0018g01660.t01	5.6e-184	650.6	2CMB6@1|root,2QPUV@2759|Eukaryota,37RJA@33090|Viridiplantae,3G7MR@35493|Streptophyta	35493|Streptophyta	S	Folate-Biopterin Transporter	-	-	-	-	-	-	-	-	-	-	-	-	BT1
BPChr08G26698	1.05763	0.000900184	0.0110834	BPChr08G26698	29760.VIT_05s0094g01000.t01	5.1e-141	507.7	KOG1192@1|root,KOG1192@2759|Eukaryota,37IVJ@33090|Viridiplantae,3G9WC@35493|Streptophyta	35493|Streptophyta	CG	Belongs to the UDP-glycosyltransferase family	-	-	2.4.1.195	ko:K11820,ko:K13691	ko00380,ko00966,ko01110,ko01210,map00380,map00966,map01110,map01210	M00370	R03213,R08164,R08668	RC00005,RC00882	ko00000,ko00001,ko00002,ko01000,ko01003	-	GT1	-	UDPGT
BPChr01G23204	1.05717	0.00335577	0.0311546	BPChr01G23204	3983.cassava4.1_006728m	4.6e-213	747.3	28JPB@1|root,2QS2K@2759|Eukaryota,37MUT@33090|Viridiplantae,3G9ZE@35493|Streptophyta,4JENN@91835|fabids	35493|Streptophyta	S	Sulfite exporter TauE/SafE	-	-	-	-	-	-	-	-	-	-	-	-	TauE
BPChr09G04737	1.05559	8.1911e-06	0.0002148	BPChr09G04737	29760.VIT_12s0034g02240.t01	1e-305	1055.8	KOG0498@1|root,KOG0498@2759|Eukaryota,37Q9H@33090|Viridiplantae,3GF0G@35493|Streptophyta	35493|Streptophyta	PT	Potassium channel	-	GO:0001101,GO:0003674,GO:0005215,GO:0005216,GO:0005244,GO:0005249,GO:0005261,GO:0005267,GO:0005488,GO:0005515,GO:0005575,GO:0005622,GO:0005623,GO:0005737,GO:0005783,GO:0005789,GO:0005886,GO:0005887,GO:0005911,GO:0006810,GO:0006811,GO:0006812,GO:0006813,GO:0008150,GO:0008324,GO:0009506,GO:0009719,GO:0009725,GO:0009737,GO:0009987,GO:0010033,GO:0012505,GO:0015075,GO:0015077,GO:0015079,GO:0015267,GO:…	-	ko:K21867	-	-	-	-	ko00000,ko02000	1.A.1.4	-	-	Ank_2,Ion_trans,KHA,cNMP_binding
BPChr11G26152	1.05524	0.000139168	0.00238302	BPChr11G26152	102107.XP_008229724.1	4.3e-90	338.2	28N0B@1|root,2QUQD@2759|Eukaryota,37TFE@33090|Viridiplantae,3GCQM@35493|Streptophyta,4JSY2@91835|fabids	35493|Streptophyta	S	EamA-like transporter family	-	-	-	-	-	-	-	-	-	-	-	-	EamA
BPChr04G14232	1.05439	1.58837e-11	1.32968e-09	BPChr04G14232	3641.EOY22451	0.0	1424.8	COG1236@1|root,KOG4282@1|root,KOG1137@2759|Eukaryota,KOG4282@2759|Eukaryota,37NBY@33090|Viridiplantae,3GAS8@35493|Streptophyta	35493|Streptophyta	AK	RNA-metabolising metallo-beta-lactamase family protein	-	GO:0000003,GO:0000578,GO:0003006,GO:0003674,GO:0003824,GO:0004518,GO:0004519,GO:0004527,GO:0005575,GO:0005622,GO:0005623,GO:0005737,GO:0006139,GO:0006725,GO:0006807,GO:0006810,GO:0006996,GO:0007275,GO:0007389,GO:0008150,GO:0008152,GO:0008409,GO:0009314,GO:0009416,GO:0009507,GO:0009536,GO:0009628,GO:0009657,GO:0009658,GO:0009790,GO:0009791,GO:0009793,GO:0009798,GO:0009880,GO:0009914,GO:0009942,GO:…	-	-	-	-	-	-	-	-	-	-	Lactamase_B,Lactamase_B_2,Myb_DNA-bind_4,RMMBL
BPChr12G06146	1.05349	9.11529e-05	0.00169205	BPChr12G06146	102107.XP_008220575.1	4e-248	864.8	COG4886@1|root,2QTEP@2759|Eukaryota,37JXG@33090|Viridiplantae,3G8ST@35493|Streptophyta,4JF83@91835|fabids	35493|Streptophyta	T	Belongs to the protein kinase superfamily. Ser Thr protein kinase family	-	GO:0000003,GO:0001558,GO:0003002,GO:0003006,GO:0003674,GO:0003824,GO:0004672,GO:0004674,GO:0004888,GO:0005102,GO:0005488,GO:0005515,GO:0005575,GO:0005622,GO:0005623,GO:0005737,GO:0005739,GO:0005886,GO:0006464,GO:0006468,GO:0006793,GO:0006796,GO:0006807,GO:0006810,GO:0006833,GO:0006950,GO:0006952,GO:0007154,GO:0007165,GO:0007275,GO:0007389,GO:0008150,GO:0008152,GO:0009266,GO:0009408,GO:0009605,GO:…	2.7.11.1	ko:K20718	ko04016,map04016	-	-	-	ko00000,ko00001,ko01000,ko01001	-	-	-	LRRNT_2,LRR_1,LRR_6,LRR_8,Pkinase
BPChr14G12659	1.05322	1.63937e-05	0.000396465	BPChr14G12659	3760.EMJ06421	1.3e-145	522.7	KOG4287@1|root,KOG4287@2759|Eukaryota,37PKA@33090|Viridiplantae,3GF5Z@35493|Streptophyta,4JEMY@91835|fabids	35493|Streptophyta	M	Hydrolyzes acetyl esters in homogalacturonan regions of pectin. In type I primary cell wall, galacturonic acid residues of pectin can be acetylated at the O-2 and O-3 positions. Decreasing the degree of acetylation of pectin gels in vitro alters their physical properties	-	GO:0003674,GO:0003824,GO:0005575,GO:0005618,GO:0005623,GO:0008150,GO:0009505,GO:0009987,GO:0016043,GO:0016787,GO:0016788,GO:0030312,GO:0044464,GO:0045229,GO:0052689,GO:0052793,GO:0071554,GO:0071555,GO:0071840,GO:0071944	3.1.1.98	ko:K19882	ko04310,map04310	-	R11202	RC00020,RC00041	ko00000,ko00001,ko01000	-	-	-	PAE
BPChr09G25305	1.05286	0.000167677	0.00279543	BPChr09G25305	102107.XP_008218832.1	3e-85	321.2	COG0688@1|root,KOG2419@2759|Eukaryota,37JS4@33090|Viridiplantae,3GCZ0@35493|Streptophyta,4JHUS@91835|fabids	35493|Streptophyta	I	Catalyzes the formation of phosphatidylethanolamine (PtdEtn) from phosphatidylserine (PtdSer). Plays a central role in phospholipid metabolism and in the interorganelle trafficking of phosphatidylserine	PSD2	GO:0000325,GO:0003674,GO:0003824,GO:0004609,GO:0005575,GO:0005622,GO:0005623,GO:0005737,GO:0005773,GO:0005774,GO:0005783,GO:0009705,GO:0012505,GO:0016020,GO:0016829,GO:0016830,GO:0016831,GO:0031090,GO:0043226,GO:0043227,GO:0043229,GO:0043231,GO:0044422,GO:0044424,GO:0044437,GO:0044444,GO:0044446,GO:0044464,GO:0098588,GO:0098805	4.1.1.65	ko:K01613	ko00564,ko01100,ko01110,map00564,map01100,map01110	M00093	R02055	RC00299	ko00000,ko00001,ko00002,ko01000	-	-	-	C2,EF-hand_5,EF-hand_8,PS_Dcarbxylase
BPChr04G24493	1.05272	2.69552e-06	8.09854e-05	BPChr04G24493	3847.GLYMA08G25673.1	2.2e-59	235.3	COG0012@1|root,KOG1491@2759|Eukaryota,37KV5@33090|Viridiplantae,3GFTS@35493|Streptophyta,4JD82@91835|fabids	35493|Streptophyta	J	Hydrolyzes ATP, and can also hydrolyze GTP with lower efficiency. Has lower affinity for GTP	-	-	-	ko:K19788	-	-	-	-	ko00000,ko03036	-	-	-	MMR_HSR1,YchF-GTPase_C
BPChr10G03561	1.04937	6.03501e-07	2.19332e-05	BPChr10G03561	29760.VIT_06s0061g00890.t01	1e-201	709.5	COG2939@1|root,KOG1283@2759|Eukaryota,37KRD@33090|Viridiplantae,3G9DV@35493|Streptophyta	35493|Streptophyta	O	Belongs to the peptidase S10 family	-	GO:0003674,GO:0003824,GO:0004180,GO:0004185,GO:0006508,GO:0006807,GO:0008150,GO:0008152,GO:0008233,GO:0008236,GO:0008238,GO:0009056,GO:0009057,GO:0009987,GO:0016787,GO:0017171,GO:0019538,GO:0030163,GO:0043170,GO:0044237,GO:0044238,GO:0044248,GO:0044257,GO:0044260,GO:0044265,GO:0044267,GO:0051603,GO:0070008,GO:0070011,GO:0071704,GO:0140096,GO:1901564,GO:1901565,GO:1901575	-	ko:K09646	-	-	-	-	ko00000,ko01000,ko01002	-	-	-	Peptidase_S10
BPChr08G02977	1.04593	0.000380515	0.00555847	BPChr08G02977	102107.XP_008232760.1	2.3e-303	1048.1	KOG4197@1|root,KOG4197@2759|Eukaryota,37RF7@33090|Viridiplantae,3G97D@35493|Streptophyta,4JF90@91835|fabids	35493|Streptophyta	S	Pentatricopeptide repeat-containing protein	-	GO:0003674,GO:0003676,GO:0003723,GO:0003824,GO:0004518,GO:0004519,GO:0005488,GO:0005575,GO:0005622,GO:0005623,GO:0006139,GO:0006725,GO:0006807,GO:0008150,GO:0008152,GO:0009451,GO:0009987,GO:0016070,GO:0016787,GO:0016788,GO:0034641,GO:0043170,GO:0043226,GO:0043227,GO:0043229,GO:0043231,GO:0043412,GO:0044237,GO:0044238,GO:0044424,GO:0044464,GO:0046483,GO:0071704,GO:0090304,GO:0090305,GO:0097159,GO:…	-	-	-	-	-	-	-	-	-	-	DYW_deaminase,PPR,PPR_2
BPChr01G05275	1.04582	0.000545428	0.00739916	BPChr01G05275	3656.XP_008466073.1	2.5e-87	328.9	28KGT@1|root,2QQU4@2759|Eukaryota,37R1K@33090|Viridiplantae,3GE05@35493|Streptophyta,4JIFI@91835|fabids	35493|Streptophyta	S	Protein SAWADEE HOMEODOMAIN HOMOLOG	-	-	-	-	-	-	-	-	-	-	-	-	SAWADEE
BPChr08G15417	1.04466	4.47795e-07	1.67402e-05	BPChr08G15417	3641.EOY34144	2.1e-77	296.6	COG5198@1|root,KOG3187@2759|Eukaryota,37NYI@33090|Viridiplantae,3G8CN@35493|Streptophyta	35493|Streptophyta	I	Catalyzes the third of the four reactions of the long- chain fatty acids elongation cycle. This endoplasmic reticulum- bound enzymatic process, allows the addition of two carbons to the chain of long- and very long-chain fatty acids VLCFAs per cycle. This enzyme catalyzes the dehydration of the 3-hydroxyacyl-CoA intermediate into trans-2,3-enoyl-CoA, within each cycle of fatty acid elongation. Th…	-	-	4.2.1.134	ko:K10703	ko00062,ko01040,ko01110,ko01212,map00062,map01040,map01110,map01212	M00415	R07760,R10827	RC00770,RC01095	ko00000,ko00001,ko00002,ko01000,ko01004	-	-	-	PTPLA
BPChr14G27656	1.04232	0.0029697	0.0284327	BPChr14G27656	3983.cassava4.1_003512m	4e-227	794.3	KOG0123@1|root,KOG0123@2759|Eukaryota,37I68@33090|Viridiplantae,3GE06@35493|Streptophyta,4JGU1@91835|fabids	35493|Streptophyta	AJ	polyadenylate-binding protein	-	-	-	ko:K13126	ko03013,ko03015,ko03018,map03013,map03015,map03018	-	-	-	ko00000,ko00001,ko03019,ko03041	-	-	-	PABP,RRM_1
BPChr06G11092	1.04221	1.00438e-06	3.41577e-05	BPChr06G11092	102107.XP_008233295.1	0.0	1716.0	COG1131@1|root,KOG0061@2759|Eukaryota,37MGE@33090|Viridiplantae,3G74H@35493|Streptophyta,4JI15@91835|fabids	35493|Streptophyta	Q	ABC transporter G family member	-	GO:0003674,GO:0003824,GO:0005215,GO:0005575,GO:0005623,GO:0005886,GO:0006810,GO:0008150,GO:0015399,GO:0015405,GO:0016020,GO:0016021,GO:0016462,GO:0016787,GO:0016817,GO:0016818,GO:0016887,GO:0017111,GO:0022804,GO:0022857,GO:0031224,GO:0042623,GO:0042626,GO:0043492,GO:0044425,GO:0044464,GO:0051179,GO:0051234,GO:0055085,GO:0071944	-	-	-	-	-	-	-	-	-	-	ABC_tran
BPChr01G20286	1.04147	7.64372e-09	3.97169e-07	BPChr01G20286	57918.XP_004299880.1	0.0	1491.1	28MVP@1|root,2QUDY@2759|Eukaryota,37RFI@33090|Viridiplantae,3G965@35493|Streptophyta,4JFIY@91835|fabids	35493|Streptophyta	S	Plant phosphoribosyltransferase C-terminal	-	GO:0003674,GO:0005488,GO:0005509,GO:0005575,GO:0005622,GO:0005623,GO:0005634,GO:0005654,GO:0005737,GO:0005783,GO:0005829,GO:0007154,GO:0007165,GO:0008150,GO:0009987,GO:0012505,GO:0016020,GO:0016021,GO:0019722,GO:0019932,GO:0023052,GO:0031224,GO:0031974,GO:0031981,GO:0035556,GO:0043167,GO:0043169,GO:0043226,GO:0043227,GO:0043229,GO:0043231,GO:0043233,GO:0044422,GO:0044424,GO:0044425,GO:0044428,GO:…	-	-	-	-	-	-	-	-	-	-	C2,PRT_C
BPChr06G30631	1.03725	6.91689e-09	3.60359e-07	BPChr06G30631	29760.VIT_13s0067g02450.t01	7.2e-193	679.9	COG0407@1|root,KOG2872@2759|Eukaryota,37RUV@33090|Viridiplantae,3GB2V@35493|Streptophyta	35493|Streptophyta	H	Belongs to the uroporphyrinogen decarboxylase family	-	GO:0003674,GO:0003824,GO:0004853,GO:0005575,GO:0005622,GO:0005623,GO:0005737,GO:0005829,GO:0006725,GO:0006778,GO:0006779,GO:0006783,GO:0006807,GO:0008150,GO:0008152,GO:0009058,GO:0009507,GO:0009526,GO:0009532,GO:0009536,GO:0009570,GO:0009719,GO:0009725,GO:0009735,GO:0009941,GO:0009987,GO:0010033,GO:0016829,GO:0016830,GO:0016831,GO:0018130,GO:0019438,GO:0031967,GO:0031975,GO:0033013,GO:0033014,GO:…	4.1.1.37	ko:K01599	ko00860,ko01100,ko01110,map00860,map01100,map01110	M00121	R03197,R04972	RC00872	ko00000,ko00001,ko00002,ko01000	-	-	-	URO-D
BPChr09G20040	1.03672	0.0008853	0.0109414	BPChr09G20040	57918.XP_004294816.1	1.2e-73	282.7	2CXRD@1|root,2RZ8E@2759|Eukaryota,37UYM@33090|Viridiplantae,3GIX9@35493|Streptophyta,4JTX5@91835|fabids	35493|Streptophyta	S	PLAC8 family	-	GO:0008150,GO:0008285,GO:0042127,GO:0048519,GO:0048523,GO:0050789,GO:0050794,GO:0065007	-	-	-	-	-	-	-	-	-	-	PLAC8
BPChr02G11870	1.03496	1.14296e-05	0.000290395	BPChr02G11870	57918.XP_004298782.1	5.7e-114	417.2	2CNC2@1|root,2QV4N@2759|Eukaryota,37JRN@33090|Viridiplantae,3GCTB@35493|Streptophyta,4JN8W@91835|fabids	35493|Streptophyta	O	Thaumatin family	-	GO:0002376,GO:0005575,GO:0005576,GO:0005622,GO:0005623,GO:0005737,GO:0006950,GO:0006952,GO:0006955,GO:0006970,GO:0008150,GO:0009605,GO:0009607,GO:0009617,GO:0009620,GO:0009628,GO:0009651,GO:0009814,GO:0009816,GO:0009817,GO:0042742,GO:0043207,GO:0044424,GO:0044464,GO:0045087,GO:0050832,GO:0050896,GO:0051704,GO:0051707,GO:0098542	-	-	-	-	-	-	-	-	-	-	Thaumatin
BPChr01G20326	1.03409	3.64396e-05	0.000804752	BPChr01G20326	3641.EOY17355	5.3e-120	437.6	COG0412@1|root,KOG3043@2759|Eukaryota,37IHG@33090|Viridiplantae,3GATA@35493|Streptophyta	35493|Streptophyta	Q	carboxymethylenebutenolidase homolog	-	GO:0003674,GO:0003824,GO:0004672,GO:0004674,GO:0005488,GO:0005515,GO:0005516,GO:0005575,GO:0005623,GO:0005886,GO:0006464,GO:0006468,GO:0006793,GO:0006796,GO:0006807,GO:0008150,GO:0008152,GO:0009987,GO:0016020,GO:0016301,GO:0016310,GO:0016740,GO:0016772,GO:0016773,GO:0019538,GO:0036211,GO:0043170,GO:0043412,GO:0044237,GO:0044238,GO:0044260,GO:0044267,GO:0044464,GO:0071704,GO:0071944,GO:0140096,GO:…	3.1.1.45	ko:K01061	ko00361,ko00364,ko00623,ko01100,ko01110,ko01120,ko01130,map00361,map00364,map00623,map01100,map01110,map01120,map01130	-	R03893,R05510,R05511,R06835,R06838,R08120,R08121,R09136,R09220,R09222	RC01018,RC01906,RC01907,RC02441,RC02467,RC02468,RC02674,RC02675,RC02686	ko00000,ko00001,ko01000	-	-	-	DLH
BPChr13G21175	1.03095	0.000425663	0.00606865	BPChr13G21175	29760.VIT_13s0067g03380.t01	0.0	1588.2	COG5184@1|root,2QSCJ@2759|Eukaryota,37Y58@33090|Viridiplantae,3GNEG@35493|Streptophyta	35493|Streptophyta	T	Protein present in Fab1, YOTB, Vac1, and EEA1	-	-	-	-	-	-	-	-	-	-	-	-	BRX,BRX_N,BRX_assoc,FYVE,PH_12,RCC1
BPChr03G04482	1.03035	0.000108568	0.00195503	BPChr03G04482	3760.EMJ06832	1.1e-119	436.4	28IY2@1|root,2QR9Q@2759|Eukaryota,37I1P@33090|Viridiplantae,3G9Q7@35493|Streptophyta,4JDMP@91835|fabids	35493|Streptophyta	S	Protein of unknown function (DUF4057)	-	-	-	-	-	-	-	-	-	-	-	-	DUF4057
BPChr06G08584	1.029	0.00537013	0.043923	BPChr06G08584	85681.XP_006425741.1	2.7e-108	399.1	KOG4197@1|root,KOG4197@2759|Eukaryota,37K9X@33090|Viridiplantae,3GH3E@35493|Streptophyta	35493|Streptophyta	J	Pentatricopeptide repeat-containing protein	-	GO:0003674,GO:0003676,GO:0003723,GO:0003824,GO:0004518,GO:0004519,GO:0005488,GO:0005575,GO:0005622,GO:0005623,GO:0006139,GO:0006725,GO:0006807,GO:0008150,GO:0008152,GO:0009451,GO:0009987,GO:0016070,GO:0016787,GO:0016788,GO:0034641,GO:0043170,GO:0043226,GO:0043227,GO:0043229,GO:0043231,GO:0043412,GO:0044237,GO:0044238,GO:0044424,GO:0044464,GO:0046483,GO:0071704,GO:0090304,GO:0090305,GO:0097159,GO:…	-	-	-	-	-	-	-	-	-	-	PPR,PPR_2,PPR_3
BPChr07G02913	1.02778	5.9455e-07	2.1648e-05	BPChr07G02913	102107.XP_008228030.1	9.8e-216	756.9	28IMD@1|root,2QUZ4@2759|Eukaryota,37NIE@33090|Viridiplantae,3GEQ7@35493|Streptophyta,4JI86@91835|fabids	35493|Streptophyta	S	Protein of unknown function, DUF547	-	-	-	-	-	-	-	-	-	-	-	-	DUF547,Lzipper-MIP1
BPChr06G25429	1.02729	4.6562e-07	1.72747e-05	BPChr06G25429	3760.EMJ10344	2.3e-195	688.3	KOG1327@1|root,KOG1327@2759|Eukaryota,37IJH@33090|Viridiplantae,3GCD1@35493|Streptophyta,4JICB@91835|fabids	35493|Streptophyta	O	E3 ubiquitin-protein ligase RGLG2-like	-	-	2.3.2.27	ko:K16280	-	-	-	-	ko00000,ko01000,ko04121	-	-	-	Copine,zf-C3HC4_3
BPChr08G31896	1.02665	0.00582288	0.046633	BPChr08G31896	3694.POPTR_0018s13200.1	4.6e-66	257.3	2AFWG@1|root,2RYYJ@2759|Eukaryota,37U6F@33090|Viridiplantae,3GJ8D@35493|Streptophyta,4JPMD@91835|fabids	35493|Streptophyta	T	phospholipase	-	GO:0003674,GO:0003824,GO:0004620,GO:0004623,GO:0005488,GO:0005509,GO:0005575,GO:0005622,GO:0005623,GO:0005737,GO:0005773,GO:0005794,GO:0008289,GO:0012505,GO:0016298,GO:0016787,GO:0016788,GO:0043167,GO:0043169,GO:0043226,GO:0043227,GO:0043229,GO:0043231,GO:0044424,GO:0044444,GO:0044464,GO:0046872,GO:0052689	3.1.1.4	ko:K01047	ko00564,ko00565,ko00590,ko00591,ko00592,ko01100,ko01110,ko04014,ko04270,ko04972,ko04975,map00564,map00565,map00590,map00591,map00592,map01100,map01110,map04014,map04270,map04972,map04975	-	R01315,R01317,R02053,R07064,R07379,R07387,R07859	RC00037,RC00094	ko00000,ko00001,ko01000,ko03036	-	-	-	-
BPChr12G29204	1.02599	2.26178e-06	6.99935e-05	BPChr12G29204	3885.XP_007136465.1	3.5e-84	318.2	29J0X@1|root,2RS8X@2759|Eukaryota,37JJZ@33090|Viridiplantae,3GHGD@35493|Streptophyta,4JI8G@91835|fabids	35493|Streptophyta	K	Dof zinc finger protein DOF4.6-like	-	-	-	-	-	-	-	-	-	-	-	-	zf-Dof
BPChr07G17332	1.02598	0.000140385	0.00239756	BPChr07G17332	3760.EMJ14845	4.1e-299	1033.9	COG0515@1|root,2SHKV@2759|Eukaryota,37YAX@33090|Viridiplantae,3G941@35493|Streptophyta,4JSBA@91835|fabids	35493|Streptophyta	T	Serine threonine-protein kinase	-	-	-	-	-	-	-	-	-	-	-	-	B_lectin,DUF3403,PAN_2,Pkinase,Pkinase_Tyr,S_locus_glycop
BPChr14G12772	1.02479	3.69984e-05	0.000814339	BPChr14G12772	3750.XP_008369884.1	4.6e-188	664.1	COG0666@1|root,2R9K7@2759|Eukaryota,37QJM@33090|Viridiplantae,3GET5@35493|Streptophyta,4JMZ3@91835|fabids	35493|Streptophyta	O	E3 ubiquitin-protein ligase	-	-	-	-	-	-	-	-	-	-	-	-	Ank,Ank_2,Ank_4
BPChr06G29563	1.02161	0.00531239	0.0436146	BPChr06G29563	4432.XP_010247436.1	1.7e-168	600.1	KOG2169@1|root,KOG2169@2759|Eukaryota,37JEN@33090|Viridiplantae,3GB81@35493|Streptophyta	35493|Streptophyta	K	isoform X1	-	-	-	ko:K04706,ko:K17427	ko04120,ko04630,ko05160,map04120,map04630,map05160	-	-	-	br01610,ko00000,ko00001,ko03011,ko04121,ko04812	-	-	-	zf-MIZ
BPChr11G05635	1.0209	0.000215109	0.0034539	BPChr11G05635	981085.XP_010088540.1	5.4e-97	360.9	28JST@1|root,2QS6K@2759|Eukaryota,37HUJ@33090|Viridiplantae,3GAQA@35493|Streptophyta,4JGCE@91835|fabids	35493|Streptophyta	S	Domain of unknown function (DUF569)	-	-	-	-	-	-	-	-	-	-	-	-	DUF569
BPChr06G09578	1.02083	0.00505839	0.0420938	BPChr06G09578	3760.EMJ14218	1.8e-171	609.0	2C11N@1|root,2QRNH@2759|Eukaryota,37MC1@33090|Viridiplantae,3G7TR@35493|Streptophyta,4JGS1@91835|fabids	35493|Streptophyta	K	transcription factor	-	GO:0000976,GO:0000981,GO:0001046,GO:0001047,GO:0001067,GO:0001228,GO:0003674,GO:0003676,GO:0003677,GO:0003690,GO:0003700,GO:0005488,GO:0005575,GO:0005622,GO:0005623,GO:0005634,GO:0006139,GO:0006351,GO:0006355,GO:0006357,GO:0006366,GO:0006725,GO:0006807,GO:0008150,GO:0008152,GO:0009058,GO:0009059,GO:0009889,GO:0009891,GO:0009893,GO:0009987,GO:0010467,GO:0010468,GO:0010556,GO:0010557,GO:0010604,GO:…	-	-	-	-	-	-	-	-	-	-	-
BPChr14G12703	1.02078	1.23371e-11	1.07409e-09	BPChr14G12703	3641.EOY31232	7.2e-244	849.7	28IFX@1|root,2QQST@2759|Eukaryota,37PEI@33090|Viridiplantae,3GCC1@35493|Streptophyta	35493|Streptophyta	S	Heparanase-like protein 3	-	GO:0003674,GO:0003824,GO:0004553,GO:0004566,GO:0005575,GO:0005618,GO:0005623,GO:0009505,GO:0016787,GO:0016798,GO:0030312,GO:0044464,GO:0071944	3.2.1.166	ko:K07964	ko00531,ko01100,ko05205,map00531,map01100,map05205	M00078	R07811	-	ko00000,ko00001,ko00002,ko00536,ko01000	-	GH79	-	Glyco_hydro_79n
BPChr03G02381	1.02071	0.00367591	0.0332291	BPChr03G02381	3641.EOY30930	0.0	1501.5	KOG1041@1|root,KOG1041@2759|Eukaryota,37IZD@33090|Viridiplantae,3GAMV@35493|Streptophyta	35493|Streptophyta	J	Belongs to the argonaute family	-	-	-	ko:K11593	-	-	-	-	ko00000,ko03019,ko03036	-	-	-	ArgoL1,ArgoL2,ArgoMid,ArgoN,PAZ,Piwi
BPChr04G02707	1.0189	1.05329e-06	3.55128e-05	BPChr04G02707	225117.XP_009378812.1	2.4e-236	824.7	COG0445@1|root,KOG2667@2759|Eukaryota,37JCQ@33090|Viridiplantae,3GA4J@35493|Streptophyta,4JGYD@91835|fabids	35493|Streptophyta	U	disulfide-isomerase	PDIL5-4	GO:0003674,GO:0003756,GO:0003824,GO:0016853,GO:0016860,GO:0016864,GO:0140096	-	ko:K20365,ko:K20367	-	-	-	-	ko00000,ko04131	-	-	-	COPIIcoated_ERV,ERGIC_N,Thioredoxin
BPChr13G02543	1.01607	1.07473e-10	7.7686e-09	BPChr13G02543	42345.XP_008791319.1	0.0	1744.6	COG1472@1|root,2QQ55@2759|Eukaryota,37HYI@33090|Viridiplantae,3G89A@35493|Streptophyta,3KX6Q@4447|Liliopsida	35493|Streptophyta	G	Lysosomal beta glucosidase	-	GO:0000272,GO:0003674,GO:0003824,GO:0004553,GO:0005575,GO:0005623,GO:0005886,GO:0005975,GO:0005976,GO:0008150,GO:0008152,GO:0008422,GO:0009056,GO:0009057,GO:0009251,GO:0015926,GO:0016020,GO:0016052,GO:0016787,GO:0016798,GO:0042597,GO:0043170,GO:0044042,GO:0044238,GO:0044464,GO:0071704,GO:0071944,GO:1901575	3.2.1.21	ko:K01188,ko:K05349	ko00460,ko00500,ko00940,ko01100,ko01110,map00460,map00500,map00940,map01100,map01110	-	R00026,R02558,R02887,R02985,R03527,R04949,R04998,R10035,R10039,R10040	RC00049,RC00059,RC00171,RC00262,RC00397,RC00451,RC00714,RC00746,RC01248	ko00000,ko00001,ko01000	-	GH1,GH3	-	Glyco_hydro_3,Glyco_hydro_3_C
BPChr09G20207	1.01603	3.33267e-06	9.83189e-05	BPChr09G20207	3983.cassava4.1_012896m	1e-122	446.4	28KZJ@1|root,2QTGE@2759|Eukaryota,37JBX@33090|Viridiplantae,3GDYH@35493|Streptophyta,4JDU6@91835|fabids	35493|Streptophyta	S	psbP domain-containing protein 5	-	GO:0005575,GO:0005622,GO:0005623,GO:0005737,GO:0009507,GO:0009534,GO:0009535,GO:0009536,GO:0009579,GO:0016020,GO:0031976,GO:0031977,GO:0031984,GO:0034357,GO:0042651,GO:0043226,GO:0043227,GO:0043229,GO:0043231,GO:0044422,GO:0044424,GO:0044434,GO:0044435,GO:0044436,GO:0044444,GO:0044446,GO:0044464,GO:0055035	-	-	-	-	-	-	-	-	-	-	PsbP
BPChr14G12645	1.01392	0.00250287	0.024865	BPChr14G12645	57918.XP_004302738.1	1.3e-215	755.4	COG5277@1|root,KOG0676@2759|Eukaryota,37I8J@33090|Viridiplantae,3G790@35493|Streptophyta,4JKTT@91835|fabids	35493|Streptophyta	Z	Belongs to the actin family	-	-	-	ko:K10355	-	-	-	-	ko00000,ko04812	-	-	-	Actin
BPChr12G26832	1.01296	0.000102804	0.00187159	BPChr12G26832	225117.XP_009341737.1	0.0	1280.0	COG0296@1|root,KOG0470@2759|Eukaryota,37JCE@33090|Viridiplantae,3GDET@35493|Streptophyta,4JM6G@91835|fabids	35493|Streptophyta	G	Isoamylase	-	GO:0000272,GO:0003674,GO:0003824,GO:0004133,GO:0004553,GO:0005575,GO:0005622,GO:0005623,GO:0005737,GO:0005975,GO:0005976,GO:0005977,GO:0005982,GO:0005983,GO:0006073,GO:0006091,GO:0006112,GO:0008150,GO:0008152,GO:0009056,GO:0009057,GO:0009058,GO:0009059,GO:0009251,GO:0009507,GO:0009536,GO:0009987,GO:0010021,GO:0010368,GO:0015980,GO:0016052,GO:0016787,GO:0016798,GO:0019156,GO:0032991,GO:0043033,GO:…	3.2.1.68	ko:K01214	ko00500,ko01100,ko01110,map00500,map01100,map01110	M00565	R09995,R11261	-	ko00000,ko00001,ko00002,ko01000	-	CBM48,GH13	-	Alpha-amylase,CBM_48
BPChr05G31782	1.01286	0.000557973	0.00753802	BPChr05G31782	3760.EMJ09431	0.0	1545.0	COG5059@1|root,KOG0239@2759|Eukaryota,37KAM@33090|Viridiplantae,3G8QJ@35493|Streptophyta,4JMRJ@91835|fabids	35493|Streptophyta	Z	Belongs to the TRAFAC class myosin-kinesin ATPase superfamily. Kinesin family	-	GO:0003674,GO:0003774,GO:0003777,GO:0003824,GO:0005575,GO:0005622,GO:0005623,GO:0005737,GO:0005739,GO:0005856,GO:0005871,GO:0005875,GO:0006091,GO:0006928,GO:0007017,GO:0007018,GO:0007275,GO:0008150,GO:0008152,GO:0009060,GO:0009791,GO:0009845,GO:0009987,GO:0015630,GO:0015980,GO:0016462,GO:0016787,GO:0016817,GO:0016818,GO:0016887,GO:0017111,GO:0032501,GO:0032502,GO:0032991,GO:0043226,GO:0043227,GO:…	-	ko:K10406	-	-	-	-	ko00000,ko04812	-	-	-	CH,Kinesin
BPChr06G31438	1.01275	0.000453235	0.00634173	BPChr06G31438	57918.XP_004306252.1	3.3e-186	658.7	COG0126@1|root,COG0220@1|root,KOG1367@2759|Eukaryota,KOG3115@2759|Eukaryota,37PAE@33090|Viridiplantae,3GFZB@35493|Streptophyta,4JGKM@91835|fabids	35493|Streptophyta	G	Belongs to the phosphoglycerate kinase family	-	GO:0003674,GO:0003824,GO:0004672,GO:0005575,GO:0005576,GO:0005618,GO:0005622,GO:0005623,GO:0005634,GO:0005737,GO:0005739,GO:0005829,GO:0005975,GO:0006464,GO:0006468,GO:0006793,GO:0006796,GO:0006807,GO:0006950,GO:0008150,GO:0008152,GO:0009058,GO:0009266,GO:0009409,GO:0009507,GO:0009526,GO:0009532,GO:0009536,GO:0009570,GO:0009579,GO:0009628,GO:0009941,GO:0009987,GO:0010035,GO:0010038,GO:0010319,GO:…	2.7.2.3	ko:K00927	ko00010,ko00710,ko01100,ko01110,ko01120,ko01130,ko01200,ko01230,map00010,map00710,map01100,map01110,map01120,map01130,map01200,map01230	M00001,M00002,M00003,M00165,M00166,M00308,M00552	R01512	RC00002,RC00043	ko00000,ko00001,ko00002,ko01000,ko04147	-	-	-	Methyltransf_4,PGK
BPChr04G24492	1.0114	0.000977234	0.0118356	BPChr04G24492	3760.EMJ20400	1.6e-73	283.1	COG0568@1|root,2QPRS@2759|Eukaryota,37MEN@33090|Viridiplantae,3G8GS@35493|Streptophyta,4JN45@91835|fabids	35493|Streptophyta	K	RNA polymerase sigma factor	-	GO:0000988,GO:0000990,GO:0003674,GO:0005575,GO:0005622,GO:0005623,GO:0005737,GO:0006139,GO:0006351,GO:0006352,GO:0006355,GO:0006725,GO:0006807,GO:0008150,GO:0008152,GO:0009058,GO:0009059,GO:0009314,GO:0009416,GO:0009507,GO:0009536,GO:0009628,GO:0009889,GO:0009987,GO:0010467,GO:0010468,GO:0010556,GO:0016070,GO:0016987,GO:0018130,GO:0019219,GO:0019222,GO:0019438,GO:0031323,GO:0031326,GO:0032774,GO:…	-	ko:K03086	-	-	-	-	ko00000,ko03021	-	-	-	Sigma70_r2,Sigma70_r3,Sigma70_r4
BPChr05G31590	1.01119	3.70947e-05	0.000814627	BPChr05G31590	29760.VIT_14s0030g01790.t01	1e-177	629.4	KOG2931@1|root,KOG2931@2759|Eukaryota,37MIH@33090|Viridiplantae,3G8FD@35493|Streptophyta	35493|Streptophyta	S	Pollen-specific protein	-	-	-	ko:K18266	-	-	-	-	ko00000,ko04147	-	-	-	Ndr
BPChr06G30437	1.00987	1.95919e-05	0.00046276	BPChr06G30437	29760.VIT_14s0060g02430.t01	1.8e-122	445.7	28JMB@1|root,2QS0I@2759|Eukaryota,37SJ4@33090|Viridiplantae,3G7K5@35493|Streptophyta	35493|Streptophyta	S	PsbP domain-containing protein 7 chloroplastic	-	GO:0005575,GO:0005622,GO:0005623,GO:0005737,GO:0009507,GO:0009536,GO:0009579,GO:0031977,GO:0043226,GO:0043227,GO:0043229,GO:0043231,GO:0044424,GO:0044436,GO:0044444,GO:0044464	-	-	-	-	-	-	-	-	-	-	PsbP
BPChr14G27692	1.00759	5.80514e-05	0.00118579	BPChr14G27692	29760.VIT_14s0219g00220.t01	4.8e-81	308.1	COG5641@1|root,KOG1601@2759|Eukaryota,37UHE@33090|Viridiplantae,3GI7C@35493|Streptophyta	35493|Streptophyta	K	Zinc finger protein CONSTANS-like	-	GO:0005575,GO:0005622,GO:0005623,GO:0005634,GO:0006355,GO:0006605,GO:0006810,GO:0006886,GO:0008104,GO:0008150,GO:0009889,GO:0010468,GO:0010556,GO:0015031,GO:0015833,GO:0019219,GO:0019222,GO:0031323,GO:0031326,GO:0033036,GO:0033365,GO:0034613,GO:0042886,GO:0043226,GO:0043227,GO:0043229,GO:0043231,GO:0044424,GO:0044464,GO:0045036,GO:0045184,GO:0046907,GO:0050789,GO:0050794,GO:0051171,GO:0051179,GO:…	-	-	-	-	-	-	-	-	-	-	CCT
BPChr08G15336	1.00732	0.00140459	0.0157948	BPChr08G15336	3694.POPTR_0008s10890.1	1.2e-35	156.0	28H6H@1|root,2QPJ9@2759|Eukaryota,37K69@33090|Viridiplantae,3GECP@35493|Streptophyta,4JNEF@91835|fabids	35493|Streptophyta	S	Protein of unknown function (DUF1262)	-	-	-	-	-	-	-	-	-	-	-	-	DUF1262
BPChr08G16643	1.00728	9.34537e-05	0.00172379	BPChr08G16643	57918.XP_004310134.1	7.4e-227	793.1	COG2939@1|root,KOG1282@2759|Eukaryota,37P9M@33090|Viridiplantae,3G8GW@35493|Streptophyta,4JG3K@91835|fabids	35493|Streptophyta	O	Belongs to the peptidase S10 family	-	GO:0003674,GO:0003824,GO:0004180,GO:0004185,GO:0005575,GO:0005618,GO:0005623,GO:0005911,GO:0006508,GO:0006807,GO:0008150,GO:0008152,GO:0008233,GO:0008236,GO:0008238,GO:0009056,GO:0009057,GO:0009505,GO:0009506,GO:0009987,GO:0016787,GO:0017171,GO:0019538,GO:0030054,GO:0030163,GO:0030312,GO:0043170,GO:0044237,GO:0044238,GO:0044248,GO:0044257,GO:0044260,GO:0044265,GO:0044267,GO:0044464,GO:0051603,GO:…	-	ko:K16297	-	-	-	-	ko00000,ko01000,ko01002	-	-	-	Peptidase_S10
BPChr06G30484	1.0037	0.000168788	0.00281156	BPChr06G30484	29760.VIT_11s0016g01140.t01	1.5e-98	367.1	2EJ8R@1|root,2QW2W@2759|Eukaryota,37MPK@33090|Viridiplantae,3GADA@35493|Streptophyta	35493|Streptophyta	-	-	-	-	-	-	-	-	-	-	-	-	-	-	-
BPChr06G30652	1.00004	8.59412e-11	6.28172e-09	BPChr06G30652	3988.XP_002533379.1	9.9e-111	406.4	KOG1632@1|root,KOG1632@2759|Eukaryota,37HHE@33090|Viridiplantae,3GH13@35493|Streptophyta,4JNHV@91835|fabids	35493|Streptophyta	S	PHD finger protein ALFIN-LIKE	-	GO:0001067,GO:0003674,GO:0003676,GO:0003677,GO:0005488,GO:0005515,GO:0005575,GO:0005622,GO:0005623,GO:0005634,GO:0005737,GO:0005829,GO:0035064,GO:0042393,GO:0043226,GO:0043227,GO:0043229,GO:0043231,GO:0043565,GO:0044212,GO:0044424,GO:0044444,GO:0044464,GO:0097159,GO:0140030,GO:0140034,GO:1901363	-	-	-	-	-	-	-	-	-	-	Alfin,PHD
BPChr04G23742	-1.00047	0.00624016	0.0493494	BPChr04G23742	2711.XP_006490434.1	1e-229	802.7	COG1055@1|root,KOG2639@2759|Eukaryota,37JD9@33090|Viridiplantae,3G7NZ@35493|Streptophyta	35493|Streptophyta	P	transporter arsB	-	-	-	-	-	-	-	-	-	-	-	-	CitMHS
BPChr08G16129	-1.00091	0.00548427	0.0445403	BPChr08G16129	3694.POPTR_0008s16890.1	6e-95	353.6	2C4WE@1|root,2QVEU@2759|Eukaryota,37HER@33090|Viridiplantae,3GEC8@35493|Streptophyta,4JJHA@91835|fabids	35493|Streptophyta	S	plastid-lipid-associated protein 6	HrBP1	GO:0000302,GO:0001101,GO:0005575,GO:0005622,GO:0005623,GO:0005634,GO:0005737,GO:0005886,GO:0006950,GO:0006952,GO:0006979,GO:0006996,GO:0008150,GO:0009507,GO:0009526,GO:0009532,GO:0009534,GO:0009535,GO:0009536,GO:0009570,GO:0009579,GO:0009605,GO:0009607,GO:0009617,GO:0009657,GO:0009658,GO:0009941,GO:0009987,GO:0010035,GO:0010193,GO:0010287,GO:0016020,GO:0016043,GO:0031967,GO:0031975,GO:0031976,GO:…	-	-	-	-	-	-	-	-	-	-	PAP_fibrillin
BPChr06G29443	-1.00102	1.48502e-08	7.43989e-07	BPChr06G29443	3760.EMJ19254	6.6e-147	527.3	28N11@1|root,2QRCN@2759|Eukaryota,37Q24@33090|Viridiplantae,3GCST@35493|Streptophyta,4JINP@91835|fabids	35493|Streptophyta	K	Common plant regulatory factor	GBF3	GO:0001067,GO:0001101,GO:0003674,GO:0003676,GO:0003677,GO:0003700,GO:0005488,GO:0005575,GO:0005622,GO:0005623,GO:0005634,GO:0005737,GO:0005829,GO:0006082,GO:0006355,GO:0006790,GO:0006807,GO:0008150,GO:0008152,GO:0009314,GO:0009416,GO:0009628,GO:0009637,GO:0009719,GO:0009725,GO:0009737,GO:0009889,GO:0009987,GO:0010033,GO:0010468,GO:0010556,GO:0016143,GO:0019219,GO:0019222,GO:0019748,GO:0019757,GO:…	-	ko:K09060	-	-	-	-	ko00000,ko03000	-	-	-	MFMR,MFMR_assoc,bZIP_1
BPChr09G24064	-1.00137	0.00345674	0.0318115	BPChr09G24064	3750.XP_008365332.1	2.1e-302	1044.6	KOG0039@1|root,KOG0039@2759|Eukaryota,37IDX@33090|Viridiplantae,3G7E7@35493|Streptophyta,4JKVV@91835|fabids	35493|Streptophyta	PQ	Ferric reduction oxidase	-	GO:0000293,GO:0003674,GO:0003824,GO:0005575,GO:0005622,GO:0005623,GO:0005737,GO:0005886,GO:0006091,GO:0008150,GO:0008152,GO:0009314,GO:0009416,GO:0009507,GO:0009536,GO:0009628,GO:0009767,GO:0009987,GO:0015979,GO:0016020,GO:0016491,GO:0016722,GO:0016723,GO:0019684,GO:0022900,GO:0043226,GO:0043227,GO:0043229,GO:0043231,GO:0044237,GO:0044424,GO:0044444,GO:0044464,GO:0050896,GO:0055114,GO:0071944	1.16.1.7	ko:K00521	-	-	-	-	ko00000,ko01000	-	-	-	FAD_binding_8,Ferric_reduct,NAD_binding_6
BPChr09G06377	-1.00163	0.000348515	0.00515251	BPChr09G06377	3641.EOX98806	2.4e-229	802.0	COG5099@1|root,KOG2049@2759|Eukaryota,37IWQ@33090|Viridiplantae,3G953@35493|Streptophyta	35493|Streptophyta	J	pumilio homolog	-	GO:0005575,GO:0005622,GO:0005623,GO:0005737,GO:0044424,GO:0044464	-	-	-	-	-	-	-	-	-	-	PUF
BPChr03G09692	-1.003	6.7858e-05	0.00133864	BPChr03G09692	102107.XP_008242919.1	1.2e-257	895.6	28IZG@1|root,2QSJM@2759|Eukaryota,37KR0@33090|Viridiplantae,3GAMT@35493|Streptophyta,4JSFM@91835|fabids	35493|Streptophyta	S	Nodulin-like	-	-	-	-	-	-	-	-	-	-	-	-	MFS_1,Nodulin-like
BPChr11G10189	-1.00339	0.000249322	0.00391972	BPChr11G10189	981085.XP_010110211.1	6.9e-11	73.6	2DZGM@1|root,2S70N@2759|Eukaryota,37XD4@33090|Viridiplantae,3GKWA@35493|Streptophyta	35493|Streptophyta	-	-	-	-	-	-	-	-	-	-	-	-	-	-	-
BPChr03G00749	-1.00429	0.00405206	0.0357928	BPChr03G00749	71139.XP_010037892.1	3.6e-74	284.6	COG0390@1|root,2RHEJ@2759|Eukaryota,38A5Y@33090|Viridiplantae,3GXSQ@35493|Streptophyta	35493|Streptophyta	S	Protein ALUMINUM SENSITIVE	-	GO:0003674,GO:0005215,GO:0005338,GO:0005460,GO:0005575,GO:0005623,GO:0005886,GO:0005887,GO:0006810,GO:0006811,GO:0006820,GO:0008150,GO:0008509,GO:0008514,GO:0010035,GO:0010038,GO:0010044,GO:0012506,GO:0015075,GO:0015165,GO:0015711,GO:0015780,GO:0015786,GO:0015931,GO:0015932,GO:0016020,GO:0016021,GO:0022857,GO:0031090,GO:0031224,GO:0031226,GO:0031982,GO:0034220,GO:0042221,GO:0043226,GO:0043227,GO:…	-	ko:K02069	-	M00211	-	-	ko00000,ko00002,ko02000	9.B.25.1	-	-	UPF0014
BPChr07G24804	-1.00517	0.00522372	0.0431034	BPChr07G24804	2711.XP_006468511.1	0.0	1176.8	COG3158@1|root,2QPSA@2759|Eukaryota,37JCM@33090|Viridiplantae,3GBDS@35493|Streptophyta	35493|Streptophyta	P	Potassium transporter	HAK11	GO:0003674,GO:0005215,GO:0005575,GO:0006810,GO:0006811,GO:0006812,GO:0006813,GO:0008150,GO:0008324,GO:0009987,GO:0015075,GO:0015077,GO:0015079,GO:0015318,GO:0015672,GO:0016020,GO:0022857,GO:0022890,GO:0030001,GO:0034220,GO:0046873,GO:0051179,GO:0051234,GO:0055085,GO:0071804,GO:0071805,GO:0098655,GO:0098660,GO:0098662	-	ko:K03549	-	-	-	-	ko00000,ko02000	2.A.72	-	-	K_trans
BPChr03G09666	-1.0052	0.0013687	0.01548	BPChr03G09666	85681.XP_006433984.1	0.0	1227.6	COG0415@1|root,KOG0133@2759|Eukaryota,37JTK@33090|Viridiplantae,3GCY9@35493|Streptophyta	35493|Streptophyta	LT	atcry1,blu1,cry1,hy4,oop2	CRY1	GO:0000166,GO:0000302,GO:0000304,GO:0001101,GO:0001558,GO:0002682,GO:0002684,GO:0002831,GO:0002833,GO:0003674,GO:0003824,GO:0004672,GO:0005488,GO:0005515,GO:0005524,GO:0005575,GO:0005622,GO:0005623,GO:0005634,GO:0005654,GO:0005737,GO:0006139,GO:0006464,GO:0006468,GO:0006725,GO:0006732,GO:0006753,GO:0006793,GO:0006796,GO:0006807,GO:0006810,GO:0006873,GO:0006874,GO:0006875,GO:0006950,GO:0006979,GO:…	-	ko:K12118	ko04712,map04712	-	-	-	ko00000,ko00001	-	-	-	Cryptochrome_C,DNA_photolyase,FAD_binding_7
BPChr01G31952	-1.0052	9.18412e-06	0.000237659	BPChr01G31952	4432.XP_010266359.1	6.2e-37	160.2	2DAQB@1|root,2S5FN@2759|Eukaryota,37WEN@33090|Viridiplantae,3GK43@35493|Streptophyta	35493|Streptophyta	S	Calvin cycle protein CP12-3	-	GO:0003674,GO:0005488,GO:0005507,GO:0005575,GO:0005622,GO:0005623,GO:0005737,GO:0006109,GO:0006950,GO:0008150,GO:0009266,GO:0009408,GO:0009507,GO:0009536,GO:0009628,GO:0009889,GO:0009890,GO:0009892,GO:0009987,GO:0010109,GO:0010110,GO:0016151,GO:0019222,GO:0031323,GO:0031324,GO:0032991,GO:0033554,GO:0034059,GO:0034605,GO:0036293,GO:0036294,GO:0042221,GO:0043167,GO:0043169,GO:0043226,GO:0043227,GO:…	-	-	-	-	-	-	-	-	-	-	CP12
BPChr14G26992	-1.00555	3.11745e-06	9.23867e-05	BPChr14G26992	102107.XP_008224794.1	4.7e-89	336.7	2CXP5@1|root,2RYTW@2759|Eukaryota,37VJU@33090|Viridiplantae,3GIAJ@35493|Streptophyta,4JNZT@91835|fabids	35493|Streptophyta	S	LRR-repeat protein	-	-	-	-	-	-	-	-	-	-	-	-	F-box,FBD,LRR_2
BPChr09G12181	-1.00611	1.17238e-05	0.000296716	BPChr09G12181	102107.XP_008224393.1	0.0	1201.0	COG0642@1|root,KOG0519@2759|Eukaryota,37JVJ@33090|Viridiplantae,3GCQ7@35493|Streptophyta,4JIW6@91835|fabids	35493|Streptophyta	T	May act early in the ethylene signal transduction pathway, possibly as an ethylene receptor, or as a regulator of the pathway	ETR2	GO:0003674,GO:0003824,GO:0004672,GO:0004674,GO:0005488,GO:0005515,GO:0005575,GO:0005622,GO:0005623,GO:0005737,GO:0005783,GO:0006464,GO:0006468,GO:0006793,GO:0006796,GO:0006807,GO:0008150,GO:0008152,GO:0009966,GO:0009968,GO:0009987,GO:0010104,GO:0010105,GO:0010646,GO:0010648,GO:0012505,GO:0016301,GO:0016310,GO:0016740,GO:0016772,GO:0016773,GO:0019538,GO:0023051,GO:0023057,GO:0036211,GO:0042562,GO:…	-	ko:K14509	ko04016,ko04075,map04016,map04075	-	-	-	ko00000,ko00001,ko01000	-	-	-	GAF,HATPase_c,HisKA,Response_reg
BPChr13G03828	-1.00641	0.00497166	0.0416196	BPChr13G03828	3760.EMJ02700	8.3e-196	689.9	KOG1192@1|root,KOG1192@2759|Eukaryota,37IVJ@33090|Viridiplantae,3G9WC@35493|Streptophyta,4JE2U@91835|fabids	35493|Streptophyta	CG	UDP-glycosyltransferase	-	GO:0000302,GO:0001101,GO:0003674,GO:0003824,GO:0005575,GO:0005622,GO:0005623,GO:0005737,GO:0005829,GO:0006082,GO:0006520,GO:0006725,GO:0006807,GO:0006950,GO:0006970,GO:0006972,GO:0006979,GO:0007154,GO:0007275,GO:0008150,GO:0008152,GO:0008194,GO:0009072,GO:0009414,GO:0009415,GO:0009605,GO:0009628,GO:0009636,GO:0009651,GO:0009653,GO:0009696,GO:0009719,GO:0009725,GO:0009737,GO:0009850,GO:0009987,GO:…	2.4.1.195,2.4.1.324	ko:K11820,ko:K13691,ko:K21374	ko00380,ko00966,ko01110,ko01210,map00380,map00966,map01110,map01210	M00370	R03213,R08164,R08668	RC00005,RC00882	ko00000,ko00001,ko00002,ko01000,ko01003	-	GT1	-	UDPGT
BPChr11G07236	-1.00677	0.00325358	0.0304367	BPChr11G07236	981085.XP_010100530.1	5.1e-57	227.6	COG5641@1|root,KOG1601@2759|Eukaryota,37TVR@33090|Viridiplantae,3GAFH@35493|Streptophyta,4JPB4@91835|fabids	35493|Streptophyta	K	response regulator	ARR3	GO:0000003,GO:0000156,GO:0000160,GO:0003006,GO:0003674,GO:0003824,GO:0004672,GO:0004674,GO:0005575,GO:0005622,GO:0005623,GO:0005634,GO:0005737,GO:0006355,GO:0006464,GO:0006468,GO:0006793,GO:0006796,GO:0006807,GO:0007154,GO:0007165,GO:0007275,GO:0007623,GO:0008150,GO:0008152,GO:0009314,GO:0009416,GO:0009628,GO:0009639,GO:0009719,GO:0009725,GO:0009735,GO:0009736,GO:0009755,GO:0009790,GO:0009791,GO:…	-	ko:K14492	ko04075,map04075	-	-	-	ko00000,ko00001	-	-	-	Response_reg
BPChr08G01686	-1.00751	0.00450807	0.0386471	BPChr08G01686	3641.EOY00227	4.8e-197	694.1	28JST@1|root,2QS6K@2759|Eukaryota,37HUJ@33090|Viridiplantae,3GAQA@35493|Streptophyta	35493|Streptophyta	S	BEST Arabidopsis thaliana protein match is	-	-	-	-	-	-	-	-	-	-	-	-	DUF569
BPChr10G21795	-1.00781	2.51676e-06	7.6317e-05	BPChr10G21795	3760.EMJ07340	5e-09	67.4	2C5KR@1|root,2SBV1@2759|Eukaryota,37XPI@33090|Viridiplantae,3GU3D@35493|Streptophyta,4JR8S@91835|fabids	35493|Streptophyta	-	-	-	-	-	-	-	-	-	-	-	-	-	-	-
BPChr06G19396	-1.00781	3.51034e-10	2.33099e-08	BPChr06G19396	3750.XP_008365049.1	1.2e-187	662.9	COG5434@1|root,2QRJW@2759|Eukaryota,37I97@33090|Viridiplantae,3G7VY@35493|Streptophyta,4JHHN@91835|fabids	35493|Streptophyta	G	Belongs to the glycosyl hydrolase 28 family	-	GO:0005575,GO:0005618,GO:0005623,GO:0009505,GO:0030312,GO:0044464,GO:0071944	3.2.1.67	ko:K01213	ko00040,ko01100,map00040,map01100	M00081	R01982,R07413	RC00049	ko00000,ko00001,ko00002,ko01000	-	-	-	Glyco_hydro_28
BPChr09G12021	-1.01007	0.000625506	0.00826233	BPChr09G12021	3641.EOX92563	1.3e-115	422.9	28ME4@1|root,2QTXK@2759|Eukaryota,37PCD@33090|Viridiplantae,3G8HQ@35493|Streptophyta	35493|Streptophyta	-	-	-	-	-	-	-	-	-	-	-	-	-	-	-
BPChr09G12179	-1.0109	0.00357532	0.0325753	BPChr09G12179	3641.EOY06042	1.6e-234	818.5	KOG2560@1|root,KOG2560@2759|Eukaryota,37RES@33090|Viridiplantae,3GGZ3@35493|Streptophyta	35493|Streptophyta	A	pre-mRNA-splicing factor	-	GO:0005575,GO:0005622,GO:0005623,GO:0005634,GO:0005681,GO:0032991,GO:0043226,GO:0043227,GO:0043229,GO:0043231,GO:0044422,GO:0044424,GO:0044428,GO:0044446,GO:0044464,GO:1990904	-	ko:K12819	ko03040,map03040	-	-	-	ko00000,ko00001,ko03041	-	-	-	Slu7
BPChr03G18624	-1.01127	0.00117692	0.0137319	BPChr03G18624	102107.XP_008235501.1	3.6e-39	168.3	2CR5Z@1|root,2S46M@2759|Eukaryota,37W7S@33090|Viridiplantae,3GJAP@35493|Streptophyta,4JQGJ@91835|fabids	35493|Streptophyta	S	protein At4g13200, chloroplastic	-	GO:0005575,GO:0005622,GO:0005623,GO:0005737,GO:0009507,GO:0009532,GO:0009534,GO:0009535,GO:0009536,GO:0009570,GO:0009579,GO:0010287,GO:0016020,GO:0031976,GO:0031984,GO:0034357,GO:0042651,GO:0043226,GO:0043227,GO:0043229,GO:0043231,GO:0044422,GO:0044424,GO:0044434,GO:0044435,GO:0044436,GO:0044444,GO:0044446,GO:0044464,GO:0055035	-	-	-	-	-	-	-	-	-	-	-
BPunChr32635	-1.0116	0.00122352	0.0142072	BPunChr32635	3760.EMJ16546	4.2e-188	664.5	KOG4197@1|root,KOG4197@2759|Eukaryota,37PVC@33090|Viridiplantae,3GFYV@35493|Streptophyta,4JGEA@91835|fabids	35493|Streptophyta	U	Pentatricopeptide repeat-containing protein At1g77360, mitochondrial-like	-	-	-	-	-	-	-	-	-	-	-	-	PPR,PPR_2
BPChr11G26326	-1.01194	6.11713e-09	3.24738e-07	BPChr11G26326	3760.EMJ12926	1.3e-206	725.7	COG0119@1|root,KOG2368@2759|Eukaryota,37K10@33090|Viridiplantae,3G7VJ@35493|Streptophyta,4JD60@91835|fabids	35493|Streptophyta	CE	Hydroxymethylglutaryl-CoA lyase	-	GO:0003674,GO:0003824,GO:0004419,GO:0005488,GO:0005575,GO:0005622,GO:0005623,GO:0005737,GO:0005739,GO:0016829,GO:0016830,GO:0016833,GO:0043167,GO:0043169,GO:0043226,GO:0043227,GO:0043229,GO:0043231,GO:0044424,GO:0044444,GO:0044464,GO:0046872	4.1.3.4	ko:K01640	ko00072,ko00280,ko00281,ko00650,ko01100,ko04146,map00072,map00280,map00281,map00650,map01100,map04146	M00036,M00088	R01360,R08090	RC00502,RC00503,RC01118,RC01946	ko00000,ko00001,ko00002,ko01000	-	-	-	HMGL-like
BPChr10G15244	-1.01243	0.00566467	0.0455755	BPChr10G15244	77586.LPERR11G04260.1	5.1e-69	268.5	29XXM@1|root,2RXST@2759|Eukaryota,37U45@33090|Viridiplantae,3GHW8@35493|Streptophyta,3KZA6@4447|Liliopsida,3IH5Z@38820|Poales	35493|Streptophyta	S	Dirigent proteins impart stereoselectivity on the phenoxy radical-coupling reaction, yielding optically active lignans from two molecules of coniferyl alcohol in the biosynthesis of lignans, flavonolignans, and alkaloids and thus plays a central role in plant secondary metabolism	-	-	-	-	-	-	-	-	-	-	-	-	Dirigent
BPChr13G00889	-1.01379	1.24335e-11	1.07769e-09	BPChr13G00889	2711.XP_006494566.1	9.6e-160	569.7	COG0510@1|root,KOG2686@2759|Eukaryota,37NWX@33090|Viridiplantae,3GCRP@35493|Streptophyta	35493|Streptophyta	M	choline kinase	-	-	2.7.1.32,2.7.1.82	ko:K02945,ko:K14156	ko00564,ko01100,ko03010,ko05231,map00564,map01100,map03010,map05231	M00090,M00092,M00178	R01021,R01468	RC00002,RC00017	br01610,ko00000,ko00001,ko00002,ko01000,ko03011	-	-	-	Choline_kin_N,Choline_kinase
BPChr05G01320	-1.01548	0.000740834	0.00944314	BPChr05G01320	981085.XP_010112706.1	9.3e-30	136.3	KOG3416@1|root,KOG3416@2759|Eukaryota,37UH5@33090|Viridiplantae,3GJ4Z@35493|Streptophyta,4JPQY@91835|fabids	35493|Streptophyta	S	SOSS complex subunit B homolog	-	-	-	-	-	-	-	-	-	-	-	-	-
BPChr11G26899	-1.01571	0.00218409	0.0223182	BPChr11G26899	3983.cassava4.1_002683m	5.6e-202	710.3	COG5036@1|root,KOG2325@1|root,KOG1161@2759|Eukaryota,KOG2325@2759|Eukaryota,37SH6@33090|Viridiplantae,3GH6R@35493|Streptophyta,4JIPF@91835|fabids	35493|Streptophyta	P	SPX domain-containing membrane protein	-	-	-	-	-	-	-	-	-	-	-	-	MFS_1,SPX,Sugar_tr
BPChr07G09869	-1.01782	1.15733e-06	3.87691e-05	BPChr07G09869	225117.XP_009374860.1	2.2e-74	285.8	KOG1603@1|root,KOG1603@2759|Eukaryota,37RPS@33090|Viridiplantae,3GA46@35493|Streptophyta,4JIIT@91835|fabids	35493|Streptophyta	P	Heavy-metal-associated domain	-	-	-	-	-	-	-	-	-	-	-	-	HMA
BPChr05G24311	-1.02012	0.000378703	0.00553898	BPChr05G24311	2711.XP_006471783.1	2.7e-264	917.9	COG0204@1|root,2QQUD@2759|Eukaryota,37RY3@33090|Viridiplantae,3GESJ@35493|Streptophyta	35493|Streptophyta	I	Acyltransferase-like protein At1g54570	-	GO:0003674,GO:0003824,GO:0004144,GO:0005575,GO:0005622,GO:0005623,GO:0005737,GO:0006066,GO:0006629,GO:0006638,GO:0006639,GO:0006641,GO:0006720,GO:0006721,GO:0008150,GO:0008152,GO:0008374,GO:0008610,GO:0009058,GO:0009507,GO:0009532,GO:0009536,GO:0009570,GO:0009987,GO:0010287,GO:0016101,GO:0016411,GO:0016740,GO:0016746,GO:0016747,GO:0017144,GO:0019432,GO:0033306,GO:0034308,GO:0043226,GO:0043227,GO:…	-	-	-	-	-	-	-	-	-	-	DAGAT,Hydrolase_4
BPChr07G01604	-1.02256	0.000500499	0.00690441	BPChr07G01604	981085.XP_010103779.1	3.9e-22	110.9	2E24G@1|root,2S9D3@2759|Eukaryota,37XCT@33090|Viridiplantae,3GM9E@35493|Streptophyta,4JR95@91835|fabids	35493|Streptophyta	-	-	-	-	-	-	-	-	-	-	-	-	-	-	-
BPChr05G22456	-1.02292	7.36271e-07	2.59403e-05	BPChr05G22456	102107.XP_008246092.1	5e-49	201.1	2A286@1|root,2RY2C@2759|Eukaryota,37TWB@33090|Viridiplantae,3GJD0@35493|Streptophyta,4JQ7B@91835|fabids	35493|Streptophyta	K	transcription factor	-	GO:0003674,GO:0003700,GO:0006355,GO:0008150,GO:0009889,GO:0010468,GO:0010556,GO:0019219,GO:0019222,GO:0031323,GO:0031326,GO:0050789,GO:0050794,GO:0051171,GO:0051252,GO:0060255,GO:0065007,GO:0080090,GO:0140110,GO:1903506,GO:2000112,GO:2001141	-	-	-	-	-	-	-	-	-	-	-
BPChr11G26884	-1.02432	0.000482923	0.00669495	BPChr11G26884	71139.XP_010029170.1	1.4e-54	219.9	29TGJ@1|root,2RZTU@2759|Eukaryota,37UUG@33090|Viridiplantae,3GIKN@35493|Streptophyta	35493|Streptophyta	S	Protein of unknown function (DUF1645)	-	-	-	-	-	-	-	-	-	-	-	-	DUF1645
BPChr09G29914	-1.02465	0.000247455	0.00389746	BPChr09G29914	3656.XP_008454446.1	0.0	1174.8	COG0443@1|root,KOG0102@2759|Eukaryota,37PN3@33090|Viridiplantae,3G8FG@35493|Streptophyta,4JG92@91835|fabids	35493|Streptophyta	O	Belongs to the heat shock protein 70 family	-	GO:0005575,GO:0005622,GO:0005623,GO:0005737,GO:0005739,GO:0043226,GO:0043227,GO:0043229,GO:0043231,GO:0044424,GO:0044444,GO:0044464	-	ko:K04043	ko03018,ko04212,ko05152,map03018,map04212,map05152	-	-	-	ko00000,ko00001,ko03019,ko03029,ko03110,ko04147	1.A.33.1	-	-	HSP70
BPChr08G03112	-1.02469	1.21334e-05	0.000305111	BPChr08G03112	102107.XP_008222205.1	1.3e-158	565.8	2CMKW@1|root,2QQRG@2759|Eukaryota,37JKM@33090|Viridiplantae,3GDPU@35493|Streptophyta,4JF71@91835|fabids	35493|Streptophyta	-	-	-	-	-	-	-	-	-	-	-	-	-	-	-
BPChr06G31254	-1.02586	0.00625713	0.0494636	BPChr06G31254	102107.XP_008242244.1	3.2e-167	594.7	COG0515@1|root,KOG1187@2759|Eukaryota,37I6S@33090|Viridiplantae,3GEU6@35493|Streptophyta,4JJZF@91835|fabids	35493|Streptophyta	T	Serine threonine-protein kinase	-	GO:0002682,GO:0002683,GO:0003674,GO:0003824,GO:0004672,GO:0004674,GO:0004675,GO:0004888,GO:0005575,GO:0005623,GO:0005886,GO:0006464,GO:0006468,GO:0006793,GO:0006796,GO:0006807,GO:0006950,GO:0006952,GO:0007154,GO:0007165,GO:0007166,GO:0007167,GO:0007178,GO:0008150,GO:0008152,GO:0009605,GO:0009607,GO:0009617,GO:0009987,GO:0016020,GO:0016301,GO:0016310,GO:0016740,GO:0016772,GO:0016773,GO:0019199,GO:…	2.7.11.1	ko:K04733	ko04010,ko04064,ko04620,ko04621,ko04624,ko04722,ko05133,ko05140,ko05142,ko05145,ko05152,ko05162,ko05164,map04010,map04064,map04620,map04621,map04624,map04722,map05133,map05140,map05142,map05145,map05152,map05162,map05164	M00686	-	-	ko00000,ko00001,ko00002,ko01000,ko01001	-	-	-	Pkinase,Pkinase_Tyr
BPChr06G22236	-1.02792	0.00249578	0.0248424	BPChr06G22236	3750.XP_008373978.1	2.4e-281	974.5	KOG0198@1|root,KOG0198@2759|Eukaryota,37MI3@33090|Viridiplantae,3GFRR@35493|Streptophyta,4JTRB@91835|fabids	35493|Streptophyta	T	Protein kinase domain	-	GO:0001101,GO:0003674,GO:0003824,GO:0004672,GO:0004674,GO:0004842,GO:0005488,GO:0005515,GO:0005575,GO:0005622,GO:0005623,GO:0005737,GO:0005768,GO:0005769,GO:0005794,GO:0005802,GO:0006464,GO:0006468,GO:0006793,GO:0006796,GO:0006807,GO:0006810,GO:0006950,GO:0006952,GO:0007034,GO:0007154,GO:0007165,GO:0008150,GO:0008152,GO:0009719,GO:0009725,GO:0009737,GO:0009738,GO:0009755,GO:0009787,GO:0009788,GO:…	-	-	-	-	-	-	-	-	-	-	DOG1,Pkinase,Pkinase_Tyr
BPChr02G25708	-1.0291	0.000103385	0.00187788	BPChr02G25708	981085.XP_010111513.1	3.6e-48	198.4	COG2862@1|root,2RA6R@2759|Eukaryota,37UVM@33090|Viridiplantae,3GEH4@35493|Streptophyta,4JP13@91835|fabids	35493|Streptophyta	S	Uncharacterized protein family, UPF0114	-	-	-	-	-	-	-	-	-	-	-	-	UPF0114
BPChr10G15175	-1.02922	0.000502969	0.006919	BPChr10G15175	3641.EOX92563	1.3e-115	422.9	28ME4@1|root,2QTXK@2759|Eukaryota,37PCD@33090|Viridiplantae,3G8HQ@35493|Streptophyta	35493|Streptophyta	-	-	-	-	-	-	-	-	-	-	-	-	-	-	-
BPChr05G31516	-1.03044	0.00212116	0.0217889	BPChr05G31516	90675.XP_010446135.1	1e-119	436.4	COG0326@1|root,KOG0019@2759|Eukaryota,37QS8@33090|Viridiplantae,3GC1U@35493|Streptophyta,3HNYQ@3699|Brassicales	35493|Streptophyta	O	heat shock protein	HSP81-3	GO:0002376,GO:0003674,GO:0003824,GO:0005575,GO:0005576,GO:0005618,GO:0005622,GO:0005623,GO:0005634,GO:0005730,GO:0005737,GO:0005773,GO:0005774,GO:0005794,GO:0005829,GO:0005886,GO:0006457,GO:0006950,GO:0006952,GO:0006955,GO:0008150,GO:0009266,GO:0009408,GO:0009507,GO:0009532,GO:0009536,GO:0009570,GO:0009605,GO:0009607,GO:0009617,GO:0009628,GO:0009814,GO:0009816,GO:0009987,GO:0010035,GO:0010038,GO:…	-	ko:K04079	ko04141,ko04151,ko04217,ko04612,ko04621,ko04626,ko04657,ko04659,ko04914,ko04915,ko05200,ko05215,ko05418,map04141,map04151,map04217,map04612,map04621,map04626,map04657,map04659,map04914,map04915,map05200,map05215,map05418	-	-	-	ko00000,ko00001,ko01009,ko03029,ko03051,ko03110,ko04131,ko04147	-	-	-	HATPase_c,HSP90
BPChr01G22847	-1.0316	0.00327198	0.030565	BPChr01G22847	3641.EOY15483	7.3e-176	623.6	KOG1192@1|root,KOG1192@2759|Eukaryota,37M5H@33090|Viridiplantae,3G79K@35493|Streptophyta	35493|Streptophyta	CG	Belongs to the UDP-glycosyltransferase family	-	GO:0003674,GO:0003824,GO:0005575,GO:0005622,GO:0005623,GO:0005737,GO:0005829,GO:0008194,GO:0016740,GO:0016757,GO:0016758,GO:0035251,GO:0043226,GO:0043227,GO:0043229,GO:0043231,GO:0044424,GO:0044444,GO:0044464,GO:0046527,GO:0080043,GO:0080044	-	-	-	-	-	-	-	-	-	-	UDPGT
BPChr06G09433	-1.03396	1.53579e-05	0.000374459	BPChr06G09433	3988.XP_002525760.1	0.0	1132.9	KOG0498@1|root,KOG0498@2759|Eukaryota,37P8B@33090|Viridiplantae,3G8SN@35493|Streptophyta,4JK0W@91835|fabids	35493|Streptophyta	P	cyclic nucleotide-gated ion channel	-	GO:0002376,GO:0003674,GO:0005215,GO:0005216,GO:0005244,GO:0005249,GO:0005261,GO:0005267,GO:0005575,GO:0005623,GO:0005886,GO:0005887,GO:0006810,GO:0006811,GO:0006812,GO:0006813,GO:0006950,GO:0006952,GO:0006955,GO:0008150,GO:0008219,GO:0008324,GO:0009626,GO:0009987,GO:0012501,GO:0015075,GO:0015077,GO:0015079,GO:0015267,GO:0015318,GO:0015672,GO:0016020,GO:0016021,GO:0022803,GO:0022832,GO:0022836,GO:…	-	ko:K05391	ko04626,map04626	-	-	-	ko00000,ko00001,ko04040	1.A.1.5	-	-	Ion_trans,cNMP_binding
BPChr11G09278	-1.03413	0.000121945	0.00213213	BPChr11G09278	3750.XP_008346036.1	2.3e-65	257.3	COG1779@1|root,KOG2703@2759|Eukaryota,37HSI@33090|Viridiplantae,3GB7M@35493|Streptophyta,4JI2I@91835|fabids	35493|Streptophyta	KLT	Zinc finger protein	-	GO:0000086,GO:0000278,GO:0003674,GO:0005488,GO:0005515,GO:0005575,GO:0005622,GO:0005623,GO:0005634,GO:0005737,GO:0006950,GO:0007049,GO:0007154,GO:0008150,GO:0009267,GO:0009605,GO:0009743,GO:0009746,GO:0009749,GO:0009987,GO:0009991,GO:0010033,GO:0022402,GO:0031667,GO:0031668,GO:0031669,GO:0033554,GO:0034284,GO:0042221,GO:0042594,GO:0043226,GO:0043227,GO:0043229,GO:0043231,GO:0044424,GO:0044464,GO:…	-	ko:K06874	-	-	-	-	ko00000	-	-	-	zf-ZPR1
BPChr10G15190	-1.03504	0.00025057	0.00393302	BPChr10G15190	3694.POPTR_0003s21940.1	0.0	1082.4	COG0515@1|root,2QQEW@2759|Eukaryota,37HW6@33090|Viridiplantae,3G7JQ@35493|Streptophyta,4JRYI@91835|fabids	35493|Streptophyta	T	G-type lectin S-receptor-like serine threonine-protein kinase	-	GO:0003674,GO:0003824,GO:0004672,GO:0004674,GO:0005488,GO:0005515,GO:0005516,GO:0005575,GO:0005623,GO:0005886,GO:0006464,GO:0006468,GO:0006793,GO:0006796,GO:0006807,GO:0008150,GO:0008152,GO:0009987,GO:0016020,GO:0016301,GO:0016310,GO:0016740,GO:0016772,GO:0016773,GO:0019538,GO:0036211,GO:0043170,GO:0043412,GO:0044237,GO:0044238,GO:0044260,GO:0044267,GO:0044464,GO:0071704,GO:0071944,GO:0140096,GO:…	-	-	-	-	-	-	-	-	-	-	B_lectin,PAN_2,Pkinase,Pkinase_Tyr,S_locus_glycop
BPChr01G21233	-1.03611	0.0052148	0.0430491	BPChr01G21233	3641.EOY29748	1.2e-72	279.6	28PHQ@1|root,2RNX7@2759|Eukaryota,37RXV@33090|Viridiplantae,3GEIU@35493|Streptophyta	35493|Streptophyta	K	transcription factor	-	GO:0003674,GO:0003676,GO:0003677,GO:0003700,GO:0005488,GO:0006355,GO:0008150,GO:0009889,GO:0009891,GO:0009893,GO:0010468,GO:0010556,GO:0010557,GO:0010604,GO:0010628,GO:0019219,GO:0019222,GO:0031323,GO:0031325,GO:0031326,GO:0031328,GO:0043565,GO:0045893,GO:0045935,GO:0048518,GO:0048522,GO:0050789,GO:0050794,GO:0051171,GO:0051173,GO:0051252,GO:0051254,GO:0060255,GO:0065007,GO:0080090,GO:0097159,GO:…	-	ko:K09286	-	-	-	-	ko00000,ko03000	-	-	-	AP2
BPChr05G04729	-1.03937	0.000301082	0.00457911	BPChr05G04729	29760.VIT_04s0023g03150.t01	1.5e-11	77.0	KOG0117@1|root,KOG0117@2759|Eukaryota,37JV9@33090|Viridiplantae,3GDH7@35493|Streptophyta	35493|Streptophyta	A	Nucleolin-like isoform X1	-	GO:0002376,GO:0003674,GO:0003676,GO:0003723,GO:0003727,GO:0003729,GO:0003730,GO:0005488,GO:0005575,GO:0005622,GO:0005623,GO:0005634,GO:0005681,GO:0005737,GO:0006417,GO:0006950,GO:0006952,GO:0006955,GO:0007623,GO:0008143,GO:0008150,GO:0009889,GO:0009890,GO:0009891,GO:0009892,GO:0009893,GO:0009894,GO:0009895,GO:0009987,GO:0010033,GO:0010468,GO:0010556,GO:0010557,GO:0010558,GO:0010604,GO:0010605,GO:…	-	-	-	-	-	-	-	-	-	-	RRM_1
BPChr07G12380	-1.0421	0.00364417	0.0330184	BPChr07G12380	2711.XP_006491886.1	1.6e-53	215.7	KOG1272@1|root,KOG1272@2759|Eukaryota,37I46@33090|Viridiplantae,3GCSP@35493|Streptophyta	35493|Streptophyta	A	U3 small nucleolar RNA-associated protein	-	GO:0000462,GO:0003674,GO:0003676,GO:0003723,GO:0005488,GO:0005575,GO:0005732,GO:0006139,GO:0006364,GO:0006396,GO:0006725,GO:0006807,GO:0008150,GO:0008152,GO:0009987,GO:0010467,GO:0016070,GO:0016072,GO:0022613,GO:0030490,GO:0030515,GO:0030684,GO:0030686,GO:0032040,GO:0032991,GO:0034470,GO:0034641,GO:0034660,GO:0042254,GO:0042274,GO:0043170,GO:0044085,GO:0044237,GO:0044238,GO:0046483,GO:0071704,GO:…	-	ko:K14768	-	-	-	-	ko00000,ko03009	-	-	-	BING4CT,WD40
BPChr06G31350	-1.04229	2.74515e-14	3.40346e-12	BPChr06G31350	102107.XP_008239288.1	7.8e-82	310.5	COG0671@1|root,KOG3146@2759|Eukaryota,37IBS@33090|Viridiplantae,3GEHE@35493|Streptophyta,4JH5Y@91835|fabids	35493|Streptophyta	I	Lipid phosphate phosphatase gamma	-	GO:0000003,GO:0003006,GO:0003674,GO:0003824,GO:0005575,GO:0005622,GO:0005623,GO:0005737,GO:0005783,GO:0005789,GO:0006464,GO:0006486,GO:0006487,GO:0006629,GO:0006638,GO:0006639,GO:0006651,GO:0006793,GO:0006796,GO:0006807,GO:0008150,GO:0008152,GO:0008195,GO:0008610,GO:0009058,GO:0009059,GO:0009100,GO:0009101,GO:0009507,GO:0009536,GO:0009856,GO:0009987,GO:0012505,GO:0016020,GO:0016021,GO:0016311,GO:…	3.6.1.43	ko:K07252	ko00510,map00510	-	R01004	RC00002	ko00000,ko00001,ko01000	-	-	-	PAP2
BPChr13G24701	-1.04231	0.000132267	0.00228682	BPChr13G24701	29760.VIT_12s0028g03080.t01	3e-50	204.9	28IMP@1|root,2QQYM@2759|Eukaryota,37HUA@33090|Viridiplantae,3GBUF@35493|Streptophyta	35493|Streptophyta	K	isoform X1	-	GO:0000003,GO:0000976,GO:0000977,GO:0000978,GO:0000981,GO:0000982,GO:0000987,GO:0001012,GO:0001067,GO:0001077,GO:0001228,GO:0001525,GO:0001568,GO:0001944,GO:0003006,GO:0003674,GO:0003676,GO:0003677,GO:0003690,GO:0003700,GO:0005488,GO:0005575,GO:0005622,GO:0005623,GO:0005634,GO:0006139,GO:0006351,GO:0006355,GO:0006357,GO:0006366,GO:0006725,GO:0006807,GO:0007275,GO:0008150,GO:0008152,GO:0009058,GO:…	-	-	-	-	-	-	-	-	-	-	DDT,HARE-HTH,Homeobox,WHIM1,WSD
BPChr08G10768	-1.04384	0.00368506	0.0332964	BPChr08G10768	3983.cassava4.1_005378m	9.7e-262	909.1	COG3424@1|root,2QPKZ@2759|Eukaryota,37K20@33090|Viridiplantae,3GA34@35493|Streptophyta,4JG41@91835|fabids	35493|Streptophyta	I	3-ketoacyl-CoA synthase	KCS2	GO:0003674,GO:0003824,GO:0004312,GO:0006725,GO:0006950,GO:0006970,GO:0008150,GO:0008152,GO:0009058,GO:0009266,GO:0009314,GO:0009409,GO:0009416,GO:0009611,GO:0009628,GO:0009698,GO:0009699,GO:0009922,GO:0009987,GO:0010345,GO:0016740,GO:0016746,GO:0016747,GO:0019438,GO:0019748,GO:0044237,GO:0044249,GO:0044550,GO:0050896,GO:0071704,GO:1901360,GO:1901362,GO:1901576	2.3.1.199	ko:K15397	ko00062,ko01110,map00062,map01110	M00415	R09419,R10825	RC00004,RC02888,RC02997	ko00000,ko00001,ko00002,ko01000	-	-	-	ACP_syn_III_C,FAE1_CUT1_RppA
BPChr03G18595	-1.04392	9.50673e-05	0.00174861	BPChr03G18595	3750.XP_008368080.1	8e-49	199.5	2BH1D@1|root,2S1AP@2759|Eukaryota,37VSI@33090|Viridiplantae,3GJY6@35493|Streptophyta,4JQ1T@91835|fabids	35493|Streptophyta	S	zinc-ribbon family	-	-	-	-	-	-	-	-	-	-	-	-	zinc_ribbon_15
BPChr10G21729	-1.0441	0.00108302	0.0128189	BPChr10G21729	3847.GLYMA16G04190.4	9.3e-10	69.7	2E20F@1|root,2S99J@2759|Eukaryota,37XBC@33090|Viridiplantae,3GKXZ@35493|Streptophyta	35493|Streptophyta	S	metal ion binding	-	-	-	-	-	-	-	-	-	-	-	-	-
BPChr06G30940	-1.04443	7.87332e-05	0.00150735	BPChr06G30940	3694.POPTR_0016s12070.1	1.3e-106	392.9	COG0580@1|root,KOG0223@2759|Eukaryota,37NTV@33090|Viridiplantae,3G7J8@35493|Streptophyta,4JD8F@91835|fabids	35493|Streptophyta	P	Belongs to the MIP aquaporin (TC 1.A.8) family	-	-	-	ko:K09872	-	-	-	-	ko00000,ko02000	1.A.8,1.A.8.11	-	-	MIP
BPChr04G18053	-1.04476	5.97386e-12	5.46832e-10	BPChr04G18053	3760.EMJ15121	3.4e-194	684.5	COG2124@1|root,KOG0157@2759|Eukaryota,37IXF@33090|Viridiplantae,3G9DS@35493|Streptophyta,4JRG3@91835|fabids	35493|Streptophyta	Q	Belongs to the cytochrome P450 family	-	GO:0003674,GO:0003824,GO:0004497,GO:0006082,GO:0006629,GO:0006720,GO:0006721,GO:0006722,GO:0008150,GO:0008152,GO:0008299,GO:0008300,GO:0008610,GO:0009056,GO:0009058,GO:0009987,GO:0016042,GO:0016053,GO:0016104,GO:0016105,GO:0016114,GO:0016115,GO:0016491,GO:0016705,GO:0016709,GO:0017144,GO:0019741,GO:0019742,GO:0019745,GO:0019752,GO:0032787,GO:0042180,GO:0042181,GO:0042182,GO:0043436,GO:0044237,GO:…	1.14.13.173,1.14.14.1	ko:K07426,ko:K07428,ko:K10717,ko:K17873,ko:K20660	ko00908,ko01100,ko01110,ko04726,map00908,map01100,map01110,map04726	-	R08053,R08054,R08055	RC01137	ko00000,ko00001,ko00199,ko01000	-	-	-	p450
BPChr05G07841	-1.04653	0.00609237	0.0484349	BPChr05G07841	981085.XP_010109333.1	2.7e-58	231.9	COG0484@1|root,KOG0712@2759|Eukaryota,37UJP@33090|Viridiplantae,3GI0D@35493|Streptophyta,4JU1F@91835|fabids	35493|Streptophyta	O	Chaperone protein dnaJ 20	-	GO:0005575,GO:0005622,GO:0005623,GO:0005634,GO:0005737,GO:0006109,GO:0006457,GO:0008150,GO:0009507,GO:0009536,GO:0009889,GO:0009987,GO:0010322,GO:0010565,GO:0010675,GO:0019216,GO:0019220,GO:0019222,GO:0019747,GO:0031323,GO:0031326,GO:0043226,GO:0043227,GO:0043229,GO:0043231,GO:0044424,GO:0044444,GO:0044464,GO:0046890,GO:0050789,GO:0050790,GO:0050794,GO:0051174,GO:0051338,GO:0061077,GO:0062012,GO:…	-	-	-	-	-	-	-	-	-	-	DnaJ
BPChr12G29238	-1.04873	6.75399e-09	3.53754e-07	BPChr12G29238	28532.XP_010520979.1	4.4e-76	292.4	KOG2265@1|root,KOG2265@2759|Eukaryota,37HR8@33090|Viridiplantae,3G7ND@35493|Streptophyta,3HWFI@3699|Brassicales	35493|Streptophyta	T	Nuclear movement family protein	-	GO:0000003,GO:0003002,GO:0003006,GO:0003674,GO:0005488,GO:0005515,GO:0005575,GO:0005622,GO:0005623,GO:0005737,GO:0005829,GO:0006457,GO:0006950,GO:0007275,GO:0007389,GO:0008150,GO:0009266,GO:0009408,GO:0009555,GO:0009628,GO:0009653,GO:0009719,GO:0009725,GO:0009735,GO:0009790,GO:0009791,GO:0009880,GO:0009888,GO:0009908,GO:0009965,GO:0009987,GO:0010016,GO:0010033,GO:0010229,GO:0010286,GO:0010450,GO:…	-	-	-	-	-	-	-	-	-	-	CS
BPChr04G01095	-1.04875	6.81026e-05	0.00134211	BPChr04G01095	3750.XP_008342124.1	9.2e-120	437.2	KOG2086@1|root,KOG2086@2759|Eukaryota,37MU8@33090|Viridiplantae,3GF53@35493|Streptophyta,4JGJ0@91835|fabids	35493|Streptophyta	Y	UBA and UBX domain-containing protein	-	GO:0000045,GO:0003674,GO:0005488,GO:0005515,GO:0005575,GO:0005622,GO:0005623,GO:0005634,GO:0005737,GO:0005829,GO:0006508,GO:0006511,GO:0006807,GO:0006914,GO:0006996,GO:0006997,GO:0006998,GO:0007030,GO:0007033,GO:0008150,GO:0008152,GO:0009056,GO:0009057,GO:0009987,GO:0010256,GO:0010498,GO:0010921,GO:0016043,GO:0016236,GO:0019208,GO:0019220,GO:0019222,GO:0019538,GO:0019888,GO:0019899,GO:0019941,GO:…	-	ko:K14012	ko04141,map04141	-	-	-	ko00000,ko00001	-	-	-	SEP,UBA_4,UBX
BPChr12G28189	-1.04919	5.93323e-05	0.00120317	BPChr12G28189	3983.cassava4.1_007940m	1.3e-44	186.0	COG5641@1|root,KOG1601@2759|Eukaryota,37RDZ@33090|Viridiplantae,3G9MY@35493|Streptophyta,4JTN5@91835|fabids	35493|Streptophyta	K	Zinc finger protein CONSTANS-like	-	GO:0001763,GO:0003674,GO:0003700,GO:0005575,GO:0005622,GO:0005623,GO:0005634,GO:0005730,GO:0006355,GO:0007275,GO:0008150,GO:0009314,GO:0009416,GO:0009628,GO:0009639,GO:0009641,GO:0009653,GO:0009889,GO:0009891,GO:0009893,GO:0010016,GO:0010223,GO:0010346,GO:0010468,GO:0010556,GO:0010557,GO:0010604,GO:0010628,GO:0016020,GO:0019219,GO:0019222,GO:0031323,GO:0031325,GO:0031326,GO:0031328,GO:0031974,GO:…	-	-	-	-	-	-	-	-	-	-	CCT,zf-B_box
BPChr06G13478	-1.04958	5.72038e-05	0.00117092	BPChr06G13478	102107.XP_008228184.1	0.0	1166.8	COG0317@1|root,KOG1157@2759|Eukaryota,37JJR@33090|Viridiplantae,3GCVM@35493|Streptophyta,4JGU4@91835|fabids	35493|Streptophyta	T	guanosine tetraphosphate biosynthetic process	-	GO:0001101,GO:0003674,GO:0003824,GO:0005575,GO:0005618,GO:0005622,GO:0005623,GO:0005737,GO:0005886,GO:0006139,GO:0006163,GO:0006164,GO:0006725,GO:0006753,GO:0006793,GO:0006796,GO:0006807,GO:0006950,GO:0007275,GO:0007568,GO:0008150,GO:0008152,GO:0008728,GO:0008893,GO:0009058,GO:0009116,GO:0009117,GO:0009119,GO:0009150,GO:0009152,GO:0009163,GO:0009165,GO:0009259,GO:0009260,GO:0009507,GO:0009536,GO:…	2.7.6.5	ko:K00951	ko00230,map00230	-	R00429	RC00002,RC00078	ko00000,ko00001,ko01000	-	-	-	HD_4,RelA_SpoT
BPChr14G27794	-1.05014	5.33116e-07	1.95566e-05	BPChr14G27794	3760.EMJ04817	1.8e-94	353.2	28PAF@1|root,2QVXT@2759|Eukaryota,37S2F@33090|Viridiplantae,3GF9K@35493|Streptophyta,4JNB9@91835|fabids	35493|Streptophyta	K	basic region leucin zipper	-	GO:0005575,GO:0005622,GO:0005623,GO:0005634,GO:0043226,GO:0043227,GO:0043229,GO:0043231,GO:0044424,GO:0044464	-	-	-	-	-	-	-	-	-	-	bZIP_1
BPChr03G19835	-1.05112	0.00149169	0.0166027	BPChr03G19835	3760.EMJ01090	1.2e-151	543.1	KOG1072@1|root,KOG1072@2759|Eukaryota,37S2H@33090|Viridiplantae,3GA8W@35493|Streptophyta,4JK21@91835|fabids	35493|Streptophyta	S	F-box kelch-repeat protein	-	GO:0000151,GO:0005575,GO:0005622,GO:0005623,GO:0031461,GO:0031463,GO:0032991,GO:0044424,GO:0044464,GO:1902494,GO:1990234	-	-	-	-	-	-	-	-	-	-	F-box,F-box-like,Kelch_1
BPChr07G18884	-1.05131	1.49355e-09	8.68163e-08	BPChr07G18884	102107.XP_008225137.1	1.6e-113	415.6	28P7E@1|root,2QVUG@2759|Eukaryota,37PP8@33090|Viridiplantae,3G96F@35493|Streptophyta,4JN78@91835|fabids	35493|Streptophyta	S	DEHYDRATION-INDUCED 19-like	-	-	2.3.2.27	ko:K22376	-	-	-	-	ko00000,ko01000,ko04121	-	-	-	Di19_C,zf-Di19
BPChr14G27777	-1.0518	0.000519064	0.00710052	BPChr14G27777	29760.VIT_08s0007g03530.t01	2.5e-52	211.8	KOG3173@1|root,KOG3173@2759|Eukaryota,37USG@33090|Viridiplantae,3GIJV@35493|Streptophyta	35493|Streptophyta	S	zinc finger A20 and AN1 domain-containing stress-associated protein	-	-	-	-	-	-	-	-	-	-	-	-	zf-A20,zf-AN1
BPChr10G04343	-1.05382	4.47911e-05	0.000959971	BPChr10G04343	29760.VIT_03s0038g01340.t01	1.7e-55	222.2	KOG4090@1|root,KOG4090@2759|Eukaryota,37USM@33090|Viridiplantae,3GIJU@35493|Streptophyta	35493|Streptophyta	S	Hemiasterlin resistant protein	-	-	-	-	-	-	-	-	-	-	-	-	CHCH
BPChr04G31973	-1.05486	0.00251109	0.0249062	BPChr04G31973	3641.EOY21806	5.4e-63	247.7	2ABX6@1|root,2RYQ6@2759|Eukaryota,37TSE@33090|Viridiplantae,3GGWR@35493|Streptophyta	35493|Streptophyta	K	Transcription factor	-	GO:0003674,GO:0003700,GO:0005575,GO:0005622,GO:0005623,GO:0005634,GO:0006355,GO:0006873,GO:0006875,GO:0006879,GO:0006950,GO:0007154,GO:0008150,GO:0009267,GO:0009605,GO:0009889,GO:0009987,GO:0009991,GO:0010106,GO:0010468,GO:0010556,GO:0019219,GO:0019222,GO:0019725,GO:0030003,GO:0031323,GO:0031326,GO:0031667,GO:0031668,GO:0031669,GO:0033554,GO:0042592,GO:0042594,GO:0043226,GO:0043227,GO:0043229,GO:…	-	-	-	-	-	-	-	-	-	-	HLH
BPChr06G21271	-1.05553	0.00301896	0.0288299	BPChr06G21271	3983.cassava4.1_007131m	4.1e-105	388.7	KOG2739@1|root,KOG2739@2759|Eukaryota,37RRX@33090|Viridiplantae,3GG8R@35493|Streptophyta,4JJXV@91835|fabids	35493|Streptophyta	D	Acidic leucine-rich nuclear phosphoprotein 32-related	-	GO:0003674,GO:0005488,GO:0005515,GO:0005575,GO:0005622,GO:0005623,GO:0005634,GO:0006323,GO:0006325,GO:0006333,GO:0006334,GO:0006338,GO:0006810,GO:0006913,GO:0006996,GO:0008150,GO:0009987,GO:0016043,GO:0022607,GO:0031497,GO:0034622,GO:0034728,GO:0042393,GO:0043044,GO:0043226,GO:0043227,GO:0043229,GO:0043231,GO:0043486,GO:0043933,GO:0044085,GO:0044424,GO:0044464,GO:0046907,GO:0051169,GO:0051179,GO:…	-	ko:K18647	-	-	-	-	ko00000,ko03019,ko04147	-	-	-	LRR_4,LRR_9
BPChr06G13508	-1.05851	1.45059e-05	0.00035833	BPChr06G13508	225117.XP_009362673.1	6.8e-147	527.3	COG5560@1|root,KOG1870@2759|Eukaryota,37S2U@33090|Viridiplantae,3G9DJ@35493|Streptophyta,4JGVA@91835|fabids	35493|Streptophyta	O	Ubiquitin carboxyl-terminal hydrolase	-	-	3.4.19.12	ko:K21343	ko04137,map04137	-	-	-	ko00000,ko00001,ko01000,ko01002,ko04121,ko04131	-	-	-	UCH
BPChr08G17085	-1.05871	0.000220144	0.00352032	BPChr08G17085	3659.XP_004138994.1	4e-177	627.9	28MXX@1|root,2QUGE@2759|Eukaryota,37THW@33090|Viridiplantae,3GG0Y@35493|Streptophyta,4JSXV@91835|fabids	35493|Streptophyta	S	Protein of unknown function (DUF1336)	-	-	-	-	-	-	-	-	-	-	-	-	DUF1336
BPChr03G15105	-1.05905	0.000193418	0.00315486	BPChr03G15105	3847.GLYMA08G14960.1	4.9e-73	280.8	29X29@1|root,2RXQW@2759|Eukaryota,37U35@33090|Viridiplantae,3GI8T@35493|Streptophyta,4JNW6@91835|fabids	35493|Streptophyta	S	Stress enhanced protein 2	-	GO:0003674,GO:0005488,GO:0005575,GO:0005622,GO:0005623,GO:0005737,GO:0006091,GO:0006950,GO:0008150,GO:0008152,GO:0009314,GO:0009411,GO:0009416,GO:0009507,GO:0009534,GO:0009535,GO:0009536,GO:0009579,GO:0009611,GO:0009628,GO:0009642,GO:0009644,GO:0009765,GO:0009987,GO:0015979,GO:0016020,GO:0016168,GO:0019684,GO:0031976,GO:0031984,GO:0034357,GO:0034644,GO:0042651,GO:0043167,GO:0043168,GO:0043226,GO:…	-	-	-	-	-	-	-	-	-	-	Chloroa_b-bind
BPChr10G03418	-1.05964	0.000830251	0.0103922	BPChr10G03418	3988.XP_002509513.1	7.2e-55	220.7	COG0009@1|root,KOG3051@2759|Eukaryota,37NCS@33090|Viridiplantae,3GCYC@35493|Streptophyta,4JMSK@91835|fabids	35493|Streptophyta	J	yrdC domain-containing protein	-	-	-	-	-	-	-	-	-	-	-	-	Sua5_yciO_yrdC
BPChr09G20532	-1.06039	1.9824e-06	6.1935e-05	BPChr09G20532	3649.evm.model.supercontig_37.98	1.3e-16	92.0	2CRBM@1|root,2R7KA@2759|Eukaryota,387XV@33090|Viridiplantae,3GW0H@35493|Streptophyta,3HV72@3699|Brassicales	35493|Streptophyta	-	-	-	-	-	-	-	-	-	-	-	-	-	-	-
BPChr11G07184	-1.06172	0.005005	0.0417915	BPChr11G07184	71139.XP_010026680.1	9.9e-179	634.0	COG0515@1|root,2QWII@2759|Eukaryota,388J2@33090|Viridiplantae,3GXCA@35493|Streptophyta	35493|Streptophyta	T	LRR receptor-like serine threonine-protein kinase	-	-	-	-	-	-	-	-	-	-	-	-	Pkinase
BPChr11G07032	-1.06196	0.0008505	0.0105982	BPChr11G07032	102107.XP_008228173.1	4.2e-301	1040.4	COG2304@1|root,2QSCC@2759|Eukaryota,37KTA@33090|Viridiplantae,3G7B2@35493|Streptophyta,4JMRG@91835|fabids	35493|Streptophyta	S	von Willebrand factor type A domain	-	-	-	-	-	-	-	-	-	-	-	-	VWA_3
BPChr13G08885	-1.06226	0.00462973	0.0393969	BPChr13G08885	3694.POPTR_0011s10770.1	9.6e-34	149.4	28NDK@1|root,2QUZ0@2759|Eukaryota,37J1R@33090|Viridiplantae,3GBH2@35493|Streptophyta,4JEN1@91835|fabids	35493|Streptophyta	-	-	-	-	-	-	-	-	-	-	-	-	-	-	-
BPunChr32654	-1.06433	1.17883e-05	0.000297578	BPunChr32654	3649.evm.model.supercontig_3.339	2.8e-92	345.5	COG2267@1|root,KOG1455@2759|Eukaryota,37JG9@33090|Viridiplantae,3GEJG@35493|Streptophyta,3HSPC@3699|Brassicales	35493|Streptophyta	I	hydrolase, alpha beta fold family protein	-	-	3.1.1.23	ko:K01054	ko00561,ko01100,ko04714,ko04723,ko04923,map00561,map01100,map04714,map04723,map04923	M00098	R01351	RC00020,RC00041	ko00000,ko00001,ko00002,ko01000,ko01002	-	-	-	Hydrolase_4
BPChr02G23475	-1.06475	0.000121152	0.00212276	BPChr02G23475	29760.VIT_02s0154g00220.t01	1.2e-111	409.8	2C3EN@1|root,2R43V@2759|Eukaryota,37SCX@33090|Viridiplantae,3GCW3@35493|Streptophyta	35493|Streptophyta	S	Zinc finger protein	-	-	-	-	-	-	-	-	-	-	-	-	-
BPChr14G28032	-1.06519	9.75488e-05	0.00178754	BPChr14G28032	102107.XP_008219249.1	6.9e-182	643.3	COG0489@1|root,KOG3022@2759|Eukaryota,37M9R@33090|Viridiplantae,3G9B4@35493|Streptophyta,4JHSH@91835|fabids	35493|Streptophyta	D	Component of the cytosolic iron-sulfur (Fe-S) protein assembly (CIA) machinery. Required for maturation of extramitochondrial Fe-S proteins. Functions as Fe-S scaffold, mediating the de novo assembly of an Fe-S cluster and its transfer to target apoproteins. Essential for embryo development	NBP35	GO:0003674,GO:0005488,GO:0005515,GO:0005575,GO:0005622,GO:0005623,GO:0005737,GO:0005829,GO:0042802,GO:0042803,GO:0044424,GO:0044444,GO:0044464,GO:0046983,GO:0048037,GO:0051536,GO:0051540	-	-	-	-	-	-	-	-	-	-	ParA
BPChr03G00975	-1.06566	0.000426525	0.0060765	BPChr03G00975	3983.cassava4.1_034241m	1.7e-34	152.9	2CPR4@1|root,2S43B@2759|Eukaryota,37WEV@33090|Viridiplantae,3GKJV@35493|Streptophyta,4JQJR@91835|fabids	35493|Streptophyta	-	-	-	-	-	-	-	-	-	-	-	-	-	-	-
BPChr08G32281	-1.06582	0.00335947	0.0311594	BPChr08G32281	3760.EMJ20217	4.5e-84	317.4	COG2124@1|root,KOG0156@2759|Eukaryota,37KBR@33090|Viridiplantae,3GC1Y@35493|Streptophyta,4JJTI@91835|fabids	35493|Streptophyta	Q	Cytochrome p450	-	-	1.14.14.1,1.14.14.19,1.14.14.32	ko:K00512,ko:K07408	ko00140,ko00380,ko00830,ko00980,ko01100,ko04913,ko04917,ko04927,ko04934,ko05204,map00140,map00380,map00830,map00980,map01100,map04913,map04917,map04927,map04934,map05204	M00109,M00110	R02211,R02354,R02355,R03089,R03408,R03629,R03783,R04852,R04853,R07000,R07001,R07021,R07022,R07079,R07080,R07081,R07085,R07087,R07098,R07099,R08390,R08392,R08517,R08518,R09418,R09423,R09442	RC00046,RC00607,RC00660,RC00661,RC00704,RC00723,RC00724,RC00923,RC01222,RC01444,RC01445,RC01727,RC01732,RC01733,RC02531	ko00000,ko00001,ko00002,ko00199,ko01000	-	-	-	p450
BPChr10G28260	-1.06895	0.00262937	0.0257939	BPChr10G28260	3641.EOY33890	9e-55	221.1	28PKI@1|root,2RZB2@2759|Eukaryota,37V5H@33090|Viridiplantae,3GIJZ@35493|Streptophyta	35493|Streptophyta	-	-	-	-	-	-	-	-	-	-	-	-	-	-	-
BPChr09G12112	-1.0704	0.00345901	0.0318115	BPChr09G12112	57918.XP_004290379.1	8.8e-158	563.1	COG3491@1|root,KOG0143@2759|Eukaryota,37JYU@33090|Viridiplantae,3G8XN@35493|Streptophyta,4JHMR@91835|fabids	35493|Streptophyta	Q	Belongs to the iron ascorbate-dependent oxidoreductase family	-	GO:0000003,GO:0000902,GO:0001101,GO:0003006,GO:0003674,GO:0003824,GO:0005575,GO:0005622,GO:0005623,GO:0005737,GO:0006082,GO:0006629,GO:0006720,GO:0006721,GO:0007154,GO:0007165,GO:0007275,GO:0008150,GO:0008152,GO:0008299,GO:0008610,GO:0009058,GO:0009314,GO:0009416,GO:0009628,GO:0009648,GO:0009653,GO:0009685,GO:0009686,GO:0009719,GO:0009725,GO:0009739,GO:0009740,GO:0009755,GO:0009791,GO:0009826,GO:…	-	-	-	-	-	-	-	-	-	-	2OG-FeII_Oxy,DIOX_N
BPChr08G27552	-1.07116	8.49191e-10	5.28089e-08	BPChr08G27552	3649.evm.model.supercontig_93.28	4.6e-62	245.0	COG5641@1|root,KOG1601@2759|Eukaryota,37TBV@33090|Viridiplantae,3GI8N@35493|Streptophyta,3HU9A@3699|Brassicales	35493|Streptophyta	K	Transcription factor	-	GO:0000976,GO:0000977,GO:0000981,GO:0001012,GO:0001067,GO:0001085,GO:0001101,GO:0001228,GO:0001678,GO:0003674,GO:0003676,GO:0003677,GO:0003682,GO:0003690,GO:0003700,GO:0005488,GO:0005515,GO:0005575,GO:0005622,GO:0005623,GO:0005634,GO:0005667,GO:0006139,GO:0006351,GO:0006355,GO:0006357,GO:0006366,GO:0006725,GO:0006807,GO:0006996,GO:0007154,GO:0007165,GO:0007275,GO:0007568,GO:0007623,GO:0008134,GO:…	-	-	-	-	-	-	-	-	-	-	GATA
BPChr02G00680	-1.07135	0.004576	0.0390802	BPChr02G00680	3641.EOY24069	3.5e-188	664.5	COG0462@1|root,KOG1448@2759|Eukaryota,37RIN@33090|Viridiplantae,3GEMM@35493|Streptophyta	35493|Streptophyta	EF	ribose-phosphate pyrophosphokinase	-	-	2.7.6.1	ko:K00948	ko00030,ko00230,ko01100,ko01110,ko01120,ko01130,ko01200,ko01230,map00030,map00230,map01100,map01110,map01120,map01130,map01200,map01230	M00005	R01049	RC00002,RC00078	ko00000,ko00001,ko00002,ko01000	-	-	-	Pribosyl_synth,Pribosyltran_N
BPChr12G26808	-1.07496	2.24714e-08	1.08155e-06	BPChr12G26808	29760.VIT_11s0078g00260.t01	1.1e-52	213.4	2CXW6@1|root,2S071@2759|Eukaryota,37UZ9@33090|Viridiplantae,3GIZY@35493|Streptophyta	35493|Streptophyta	-	-	-	-	-	-	-	-	-	-	-	-	-	-	-
BPChr07G24808	-1.07576	0.000132781	0.00229167	BPChr07G24808	3988.XP_002523404.1	1.3e-297	1028.5	COG0459@1|root,KOG0356@2759|Eukaryota,37M32@33090|Viridiplantae,3GGAQ@35493|Streptophyta,4JMZP@91835|fabids	35493|Streptophyta	O	Belongs to the chaperonin (HSP60) family	-	GO:0003674,GO:0005488,GO:0005515,GO:0005575,GO:0005622,GO:0005623,GO:0005634,GO:0005730,GO:0005737,GO:0005739,GO:0005829,GO:0005840,GO:0006457,GO:0006458,GO:0006996,GO:0007005,GO:0008150,GO:0009507,GO:0009526,GO:0009532,GO:0009536,GO:0009570,GO:0009941,GO:0009987,GO:0016020,GO:0016043,GO:0022626,GO:0031967,GO:0031974,GO:0031975,GO:0031981,GO:0032991,GO:0043226,GO:0043227,GO:0043228,GO:0043229,GO:…	-	ko:K04077	ko03018,ko04212,ko04940,ko05134,ko05152,map03018,map04212,map04940,map05134,map05152	-	-	-	ko00000,ko00001,ko03019,ko03029,ko03110,ko04147	-	-	-	Cpn60_TCP1
BPChr09G06436	-1.07735	0.00521494	0.0430491	BPChr09G06436	981085.XP_010094136.1	2.8e-139	501.5	COG2801@1|root,KOG0017@2759|Eukaryota,37KCK@33090|Viridiplantae,3GEQ8@35493|Streptophyta,4JGRF@91835|fabids	35493|Streptophyta	L	Phosphate-induced protein 1 conserved region	-	GO:0002239,GO:0005575,GO:0005618,GO:0005622,GO:0005623,GO:0005737,GO:0005794,GO:0005829,GO:0005911,GO:0008150,GO:0009505,GO:0009506,GO:0009605,GO:0009607,GO:0012505,GO:0016020,GO:0030054,GO:0030312,GO:0043207,GO:0043226,GO:0043227,GO:0043229,GO:0043231,GO:0044424,GO:0044444,GO:0044464,GO:0050896,GO:0051704,GO:0051707,GO:0055044,GO:0071944	-	-	-	-	-	-	-	-	-	-	Phi_1
BPChr10G12982	-1.07809	0.00411735	0.0361945	BPChr10G12982	3885.XP_007150082.1	3.8e-52	211.1	KOG3173@1|root,KOG3173@2759|Eukaryota,37USG@33090|Viridiplantae,3GIJV@35493|Streptophyta,4JPIC@91835|fabids	35493|Streptophyta	S	Zinc finger A20 and AN1 domain-containing stress-associated protein	-	-	-	-	-	-	-	-	-	-	-	-	zf-A20,zf-AN1
BPChr08G01309	-1.07819	0.00240598	0.0241325	BPChr08G01309	4432.XP_010257089.1	3.8e-71	275.0	2CN6J@1|root,2QU5R@2759|Eukaryota,37S5H@33090|Viridiplantae,3GDWR@35493|Streptophyta	35493|Streptophyta	K	Transcription factor	-	GO:0000003,GO:0003006,GO:0003674,GO:0003700,GO:0006139,GO:0006259,GO:0006260,GO:0006261,GO:0006355,GO:0006725,GO:0006807,GO:0007049,GO:0007275,GO:0007623,GO:0008150,GO:0008152,GO:0008283,GO:0009058,GO:0009059,GO:0009719,GO:0009725,GO:0009735,GO:0009791,GO:0009889,GO:0009908,GO:0009962,GO:0009987,GO:0010033,GO:0010229,GO:0010252,GO:0010468,GO:0010556,GO:0019219,GO:0019222,GO:0022402,GO:0022414,GO:…	-	-	-	-	-	-	-	-	-	-	TCP
BPChr06G27295	-1.07886	0.00358717	0.0326529	BPChr06G27295	4432.XP_010247416.1	5.6e-206	724.2	KOG2344@1|root,KOG2344@2759|Eukaryota,37PT1@33090|Viridiplantae,3GE9X@35493|Streptophyta	35493|Streptophyta	U	exocyst complex component	-	GO:0006810,GO:0006887,GO:0008150,GO:0009987,GO:0016192,GO:0032940,GO:0046903,GO:0051179,GO:0051234	-	ko:K07195	ko04910,map04910	-	-	-	ko00000,ko00001,ko03036,ko04131	-	-	-	Exo70
BPChr01G16773	-1.07889	3.707e-05	0.000814627	BPChr01G16773	3649.evm.model.supercontig_26.145	0.0	1168.3	28JVX@1|root,2QSA1@2759|Eukaryota,37IVU@33090|Viridiplantae,3G7Y2@35493|Streptophyta,3HSG2@3699|Brassicales	35493|Streptophyta	S	N-terminal C2 in EEIG1 and EHBP1 proteins	-	GO:0005575,GO:0005622,GO:0005623,GO:0005737,GO:0005829,GO:0005886,GO:0006810,GO:0006928,GO:0006950,GO:0006970,GO:0006996,GO:0007097,GO:0008150,GO:0009314,GO:0009416,GO:0009628,GO:0009637,GO:0009657,GO:0009658,GO:0009787,GO:0009902,GO:0009903,GO:0009966,GO:0009987,GO:0010029,GO:0010646,GO:0016020,GO:0016043,GO:0019750,GO:0023051,GO:0030029,GO:0030048,GO:0030705,GO:0031022,GO:0042592,GO:0044424,GO:…	-	-	-	-	-	-	-	-	-	-	NT-C2
BPChr09G02326	-1.07961	0.00199614	0.0208083	BPChr09G02326	3983.cassava4.1_013428m	1.2e-136	492.7	KOG3112@1|root,KOG3112@2759|Eukaryota,37MIJ@33090|Viridiplantae,3GEVZ@35493|Streptophyta,4JMAF@91835|fabids	35493|Streptophyta	O	Chaperone protein which promotes assembly of the 20S proteasome as part of a heterodimer with PSMG1	-	-	-	ko:K11876	-	-	-	-	ko00000,ko03051	-	-	-	PAC2
BPChr03G15690	-1.08041	0.000171334	0.00285154	BPChr03G15690	3760.EMJ03781	1.6e-80	305.8	29DJB@1|root,2RKPE@2759|Eukaryota,37UB8@33090|Viridiplantae,3GIFU@35493|Streptophyta,4JH7X@91835|fabids	35493|Streptophyta	S	Glyoxalase/Bleomycin resistance protein/Dioxygenase superfamily	-	-	-	ko:K08234	-	-	-	-	ko00000	-	-	-	Glyoxalase
BPChr08G15786	-1.0832	1.83053e-05	0.000435702	BPChr08G15786	3641.EOY04975	6.3e-234	816.6	KOG0254@1|root,KOG0254@2759|Eukaryota,37MDA@33090|Viridiplantae,3GB95@35493|Streptophyta	35493|Streptophyta	E	Belongs to the major facilitator superfamily. Sugar transporter (TC 2.A.1.1) family	-	GO:0000325,GO:0003674,GO:0005215,GO:0005365,GO:0005366,GO:0005575,GO:0005622,GO:0005623,GO:0005737,GO:0005773,GO:0005774,GO:0005886,GO:0005887,GO:0006810,GO:0006811,GO:0006812,GO:0008150,GO:0008324,GO:0009705,GO:0015075,GO:0015077,GO:0015078,GO:0015166,GO:0015291,GO:0015293,GO:0015294,GO:0015295,GO:0015318,GO:0015672,GO:0015791,GO:0015798,GO:0015850,GO:0016020,GO:0016021,GO:0022804,GO:0022857,GO:…	-	ko:K08150	-	-	-	-	ko00000,ko02000	2.A.1.1.25,2.A.1.1.62,2.A.1.1.63,2.A.1.1.66,2.A.1.8	-	-	Sugar_tr
BPChr13G00533	-1.08537	0.00296708	0.0284327	BPChr13G00533	3760.EMJ00879	2.9e-285	988.4	COG0532@1|root,KOG1144@2759|Eukaryota,37NIC@33090|Viridiplantae,3GG0K@35493|Streptophyta,4JGI8@91835|fabids	35493|Streptophyta	J	eukaryotic translation initiation factor	-	GO:0000166,GO:0001882,GO:0001883,GO:0002181,GO:0002183,GO:0003674,GO:0003676,GO:0003723,GO:0003743,GO:0003824,GO:0003924,GO:0005488,GO:0005525,GO:0005575,GO:0005622,GO:0005623,GO:0005737,GO:0006412,GO:0006413,GO:0006518,GO:0006807,GO:0008135,GO:0008150,GO:0008152,GO:0009058,GO:0009059,GO:0009987,GO:0010467,GO:0016462,GO:0016787,GO:0016817,GO:0016818,GO:0017076,GO:0017111,GO:0019001,GO:0019538,GO:…	1.10.3.9	ko:K02703,ko:K03243	ko00195,ko01100,ko03013,map00195,map01100,map03013	M00161	-	-	ko00000,ko00001,ko00002,ko00194,ko01000,ko03012	-	-	-	GTP_EFTU,GTP_EFTU_D2,IF-2
BPChr02G18040	-1.08551	0.000552843	0.00747387	BPChr02G18040	981085.XP_010093664.1	0.0	1313.5	COG0480@1|root,KOG0465@2759|Eukaryota,37K55@33090|Viridiplantae,3G82M@35493|Streptophyta,4JJGU@91835|fabids	35493|Streptophyta	J	Chloroplast-localized elongation factor EF-G involved in protein synthesis in plastids. Catalyzes the GTP-dependent ribosomal translocation step during translation elongation. During this step, the ribosome changes from the pre-translocational (PRE) to the post-translocational (POST) state as the newly formed A- site-bound peptidyl-tRNA and P-site-bound deacylated tRNA move to the P and E sites, …	-	GO:0000166,GO:0003674,GO:0005488,GO:0005524,GO:0005575,GO:0005576,GO:0005622,GO:0005623,GO:0005737,GO:0005739,GO:0006996,GO:0007275,GO:0008144,GO:0008150,GO:0009507,GO:0009526,GO:0009532,GO:0009536,GO:0009570,GO:0009657,GO:0009658,GO:0009791,GO:0009845,GO:0009941,GO:0009987,GO:0016043,GO:0017076,GO:0030554,GO:0031967,GO:0031975,GO:0032501,GO:0032502,GO:0032553,GO:0032555,GO:0032559,GO:0035639,GO:…	-	ko:K02355	-	-	-	-	ko00000,ko03012,ko03029	-	-	-	EFG_C,EFG_II,EFG_IV,GTP_EFTU,GTP_EFTU_D2
BPChr03G23190	-1.08598	9.17814e-12	8.09867e-10	BPChr03G23190	3760.EMJ04814	3.3e-54	219.9	KOG4197@1|root,KOG4197@2759|Eukaryota,37RUT@33090|Viridiplantae,3GC3I@35493|Streptophyta,4JKXI@91835|fabids	35493|Streptophyta	S	Pentatricopeptide repeat-containing protein	-	GO:0003674,GO:0003676,GO:0003723,GO:0003824,GO:0004518,GO:0004519,GO:0005488,GO:0005575,GO:0005622,GO:0005623,GO:0006139,GO:0006725,GO:0006807,GO:0008150,GO:0008152,GO:0009451,GO:0009987,GO:0016070,GO:0016787,GO:0016788,GO:0034641,GO:0043170,GO:0043226,GO:0043227,GO:0043229,GO:0043231,GO:0043412,GO:0044237,GO:0044238,GO:0044424,GO:0044464,GO:0046483,GO:0071704,GO:0090304,GO:0090305,GO:0097159,GO:…	-	ko:K17710	-	-	-	-	ko00000,ko03016,ko03029	-	-	-	PPR,PPR_1,PPR_2,PPR_3,Pkinase
BPChr08G24774	-1.08748	0.000281867	0.00434763	BPChr08G24774	29760.VIT_01s0011g06190.t01	0.0	1679.5	COG0642@1|root,KOG0519@2759|Eukaryota,37NGJ@33090|Viridiplantae,3G8RW@35493|Streptophyta	35493|Streptophyta	T	Histidine kinase	-	GO:0000160,GO:0001101,GO:0003674,GO:0003824,GO:0004672,GO:0004673,GO:0004721,GO:0004888,GO:0005488,GO:0005515,GO:0005575,GO:0005622,GO:0005623,GO:0005737,GO:0005783,GO:0005886,GO:0006464,GO:0006468,GO:0006470,GO:0006793,GO:0006796,GO:0006807,GO:0006810,GO:0006811,GO:0006820,GO:0006950,GO:0006952,GO:0006970,GO:0007154,GO:0007165,GO:0007231,GO:0007275,GO:0008150,GO:0008152,GO:0008272,GO:0009267,GO:…	2.7.13.3	ko:K14489	ko04075,map04075	-	-	-	ko00000,ko00001,ko01000	-	-	-	CHASE,HATPase_c,HisKA,Response_reg
BPChr09G04739	-1.08914	0.00277728	0.0270241	BPChr09G04739	225117.XP_009348755.1	1.6e-84	320.9	28HJJ@1|root,2QUVM@2759|Eukaryota,37RVJ@33090|Viridiplantae,3GEF1@35493|Streptophyta,4JIBY@91835|fabids	35493|Streptophyta	S	protein At3g15000, mitochondrial-like	-	GO:0000959,GO:0005575,GO:0005622,GO:0005623,GO:0005737,GO:0005739,GO:0006139,GO:0006725,GO:0006807,GO:0008150,GO:0008152,GO:0009451,GO:0009987,GO:0016070,GO:0016071,GO:0016556,GO:0034641,GO:0043170,GO:0043226,GO:0043227,GO:0043229,GO:0043231,GO:0043412,GO:0044237,GO:0044238,GO:0044424,GO:0044444,GO:0044464,GO:0046483,GO:0071704,GO:0080156,GO:0090304,GO:1900864,GO:1900865,GO:1901360	-	-	-	-	-	-	-	-	-	-	-
BPChr08G16159	-1.08934	0.000357956	0.00526426	BPChr08G16159	81985.XP_006284535.1	4.1e-43	181.4	2CNFE@1|root,2S40Q@2759|Eukaryota,37WBA@33090|Viridiplantae,3GPZ0@35493|Streptophyta,3I0FN@3699|Brassicales	35493|Streptophyta	T	EF-hand, calcium binding motif	-	-	-	-	-	-	-	-	-	-	-	-	EF-hand_5
BPChr10G03450	-1.09016	1.06482e-12	1.1275e-10	BPChr10G03450	29760.VIT_06s0061g01060.t01	3.5e-148	532.3	KOG2662@1|root,KOG2662@2759|Eukaryota,37IES@33090|Viridiplantae,3GDSY@35493|Streptophyta	35493|Streptophyta	P	magnesium transporter	-	GO:0003674,GO:0005215,GO:0005575,GO:0005622,GO:0005623,GO:0005737,GO:0006810,GO:0006811,GO:0006812,GO:0006996,GO:0008150,GO:0008324,GO:0009314,GO:0009416,GO:0009507,GO:0009526,GO:0009536,GO:0009628,GO:0009657,GO:0009668,GO:0009941,GO:0009987,GO:0010027,GO:0010117,GO:0010960,GO:0015075,GO:0015095,GO:0015318,GO:0015693,GO:0016043,GO:0022857,GO:0022890,GO:0030001,GO:0031967,GO:0031975,GO:0034220,GO:…	-	ko:K16075	-	-	-	-	ko00000,ko02000	1.A.35.5	-	-	CorA
BPChr09G01149	-1.09034	0.00231561	0.0234439	BPChr09G01149	3641.EOX98432	2e-28	132.1	KOG1944@1|root,KOG1944@2759|Eukaryota,37MM8@33090|Viridiplantae,3GCA3@35493|Streptophyta	35493|Streptophyta	S	Belongs to the peroxisomal membrane protein PXMP2 4 family	-	GO:0005575,GO:0005622,GO:0005623,GO:0005737,GO:0044424,GO:0044464	-	ko:K13348	ko04146,map04146	-	-	-	ko00000,ko00001	-	-	-	Mpv17_PMP22
BPChr06G30287	-1.09276	0.00404877	0.0357903	BPChr06G30287	3827.XP_004498498.1	9.3e-73	280.4	COG2110@1|root,KOG2633@2759|Eukaryota,37P9J@33090|Viridiplantae,3G82W@35493|Streptophyta,4JJ76@91835|fabids	35493|Streptophyta	BK	Appr-1'-p processing enzyme	-	-	-	-	-	-	-	-	-	-	-	-	Macro
BPChr05G00128	-1.09482	0.00158378	0.0174573	BPChr05G00128	3827.XP_004486466.1	2.6e-39	169.1	KOG2409@1|root,KOG2409@2759|Eukaryota,37JHJ@33090|Viridiplantae,3GGFV@35493|Streptophyta,4JM29@91835|fabids	35493|Streptophyta	J	protein KRI1 homolog	-	-	-	ko:K14786	-	-	-	-	ko00000,ko03009	-	-	-	Kri1,Kri1_C
BPChr12G06157	-1.09572	2.39476e-07	9.45845e-06	BPChr12G06157	102107.XP_008220584.1	3.6e-123	448.0	COG0596@1|root,KOG1454@2759|Eukaryota,37M56@33090|Viridiplantae,3G74N@35493|Streptophyta,4JH86@91835|fabids	35493|Streptophyta	S	Alpha/beta hydrolase family	-	GO:0003674,GO:0003824,GO:0005575,GO:0005618,GO:0005623,GO:0005886,GO:0008150,GO:0016020,GO:0016787,GO:0016822,GO:0016823,GO:0030312,GO:0034820,GO:0040007,GO:0044110,GO:0044116,GO:0044117,GO:0044403,GO:0044419,GO:0044464,GO:0051704,GO:0071944	-	-	-	-	-	-	-	-	-	-	Abhydrolase_1,Abhydrolase_6
BPChr02G11843	-1.09604	9.44284e-10	5.74428e-08	BPChr02G11843	102107.XP_008238855.1	5.6e-92	344.0	COG0386@1|root,KOG1651@2759|Eukaryota,37IT1@33090|Viridiplantae,3GE5K@35493|Streptophyta,4JHR1@91835|fabids	35493|Streptophyta	O	Belongs to the glutathione peroxidase family	-	GO:0003674,GO:0003824,GO:0004601,GO:0004602,GO:0005575,GO:0005576,GO:0005622,GO:0005623,GO:0005737,GO:0005739,GO:0005829,GO:0005886,GO:0006950,GO:0006970,GO:0008150,GO:0008152,GO:0009507,GO:0009536,GO:0009628,GO:0009636,GO:0009651,GO:0009987,GO:0010035,GO:0010038,GO:0016020,GO:0016209,GO:0016491,GO:0016684,GO:0042221,GO:0043226,GO:0043227,GO:0043229,GO:0043231,GO:0044424,GO:0044444,GO:0044464,GO:…	1.11.1.9	ko:K00432	ko00480,ko00590,ko04918,map00480,map00590,map04918	-	R00274,R07034,R07035	RC00011,RC00982	ko00000,ko00001,ko01000	-	-	-	GSHPx
BPChr05G17532	-1.09608	0.003146	0.0296854	BPChr05G17532	4098.XP_009601406.1	9.2e-68	263.5	KOG2265@1|root,KOG2265@2759|Eukaryota,37HR8@33090|Viridiplantae,3G7ND@35493|Streptophyta,44I9K@71274|asterids	35493|Streptophyta	T	CS domain	-	-	-	-	-	-	-	-	-	-	-	-	CS
BPChr11G10160	-1.09735	0.000528211	0.00720051	BPChr11G10160	981085.XP_010110208.1	5.7e-82	310.8	COG5574@1|root,KOG0823@2759|Eukaryota,37TJ9@33090|Viridiplantae,3GFZK@35493|Streptophyta,4JFG0@91835|fabids	35493|Streptophyta	O	E3 ubiquitin-protein ligase	-	GO:0001101,GO:0003674,GO:0003824,GO:0004842,GO:0005488,GO:0005515,GO:0005575,GO:0005622,GO:0005623,GO:0005737,GO:0005783,GO:0005789,GO:0006464,GO:0006508,GO:0006511,GO:0006515,GO:0006807,GO:0006810,GO:0006886,GO:0006950,GO:0006970,GO:0008104,GO:0008150,GO:0008152,GO:0009056,GO:0009057,GO:0009266,GO:0009409,GO:0009414,GO:0009415,GO:0009611,GO:0009628,GO:0009719,GO:0009723,GO:0009725,GO:0009987,GO:…	2.3.2.27	ko:K10666	ko04141,map04141	-	-	-	ko00000,ko00001,ko01000,ko04121	-	-	-	zf-C3HC4,zf-C3HC4_2,zf-RING_UBOX
BPChr06G02213	-1.09765	0.00314937	0.0296903	BPChr06G02213	29760.VIT_04s0023g01020.t01	4.1e-288	997.3	KOG0773@1|root,KOG0773@2759|Eukaryota,37QJV@33090|Viridiplantae,3GB2T@35493|Streptophyta	35493|Streptophyta	K	BEL1-like homeodomain protein	-	GO:0003674,GO:0003700,GO:0006355,GO:0007275,GO:0008150,GO:0009653,GO:0009889,GO:0009965,GO:0010016,GO:0010468,GO:0010556,GO:0019219,GO:0019222,GO:0031323,GO:0031326,GO:0032501,GO:0032502,GO:0048366,GO:0048367,GO:0048731,GO:0048827,GO:0048856,GO:0050789,GO:0050794,GO:0051171,GO:0051252,GO:0060255,GO:0065007,GO:0080090,GO:0099402,GO:0140110,GO:1903506,GO:1905392,GO:2000112,GO:2001141	-	-	-	-	-	-	-	-	-	-	Homeobox_KN,POX
BPChr05G14642	-1.09799	0.000582862	0.00783106	BPChr05G14642	3760.EMJ01003	3.2e-97	362.5	KOG4197@1|root,KOG4197@2759|Eukaryota,37RKE@33090|Viridiplantae,3GDYR@35493|Streptophyta,4JJH6@91835|fabids	35493|Streptophyta	S	Pentatricopeptide repeat-containing protein	-	GO:0003674,GO:0003676,GO:0003723,GO:0003824,GO:0004518,GO:0004519,GO:0005488,GO:0005575,GO:0005622,GO:0005623,GO:0006139,GO:0006725,GO:0006807,GO:0008150,GO:0008152,GO:0009451,GO:0009987,GO:0016070,GO:0016787,GO:0016788,GO:0034641,GO:0043170,GO:0043226,GO:0043227,GO:0043229,GO:0043231,GO:0043412,GO:0044237,GO:0044238,GO:0044424,GO:0044464,GO:0046483,GO:0071704,GO:0090304,GO:0090305,GO:0097159,GO:…	-	-	-	-	-	-	-	-	-	-	PPR,PPR_1,PPR_2,PPR_3
BPChr01G32530	-1.09843	0.000118747	0.00209751	BPChr01G32530	3641.EOY29347	1.9e-191	675.2	KOG0583@1|root,KOG0583@2759|Eukaryota,37Q1P@33090|Viridiplantae,3G72J@35493|Streptophyta	35493|Streptophyta	T	Non-specific serine threonine protein kinase	CIPK16	GO:0003674,GO:0003824,GO:0004672,GO:0004674,GO:0005575,GO:0005622,GO:0005623,GO:0006464,GO:0006468,GO:0006793,GO:0006796,GO:0006807,GO:0006810,GO:0006811,GO:0006812,GO:0006814,GO:0006950,GO:0006952,GO:0006970,GO:0006972,GO:0007154,GO:0007165,GO:0008150,GO:0008152,GO:0009605,GO:0009607,GO:0009620,GO:0009628,GO:0009651,GO:0009987,GO:0015672,GO:0016301,GO:0016310,GO:0016740,GO:0016772,GO:0016773,GO:…	2.7.11.11	ko:K07198	ko04068,ko04140,ko04150,ko04151,ko04152,ko04211,ko04213,ko04371,ko04530,ko04710,ko04714,ko04910,ko04920,ko04921,ko04922,ko04931,ko04932,ko05410,ko05418,map04068,map04140,map04150,map04151,map04152,map04211,map04213,map04371,map04530,map04710,map04714,map04910,map04920,map04921,map04922,map04931,map04932,map05410,map05418	-	-	-	ko00000,ko00001,ko01000,ko01001,ko03029,ko04131	-	-	-	NAF,Pkinase
BPChr10G21676	-1.09938	0.00355208	0.0324542	BPChr10G21676	3641.EOX93234	2.2e-221	775.4	COG2256@1|root,KOG2028@2759|Eukaryota,37PNU@33090|Viridiplantae,3G93Y@35493|Streptophyta	35493|Streptophyta	L	AAA-type ATPase family protein	-	GO:0000731,GO:0003674,GO:0003824,GO:0005575,GO:0005622,GO:0005623,GO:0005634,GO:0006139,GO:0006259,GO:0006275,GO:0006281,GO:0006725,GO:0006807,GO:0006950,GO:0006974,GO:0008150,GO:0008152,GO:0009058,GO:0009059,GO:0009889,GO:0009987,GO:0010556,GO:0016462,GO:0016787,GO:0016817,GO:0016818,GO:0016887,GO:0017111,GO:0018130,GO:0019219,GO:0019222,GO:0019438,GO:0030174,GO:0031323,GO:0031326,GO:0033554,GO:…	-	ko:K07478	-	-	-	-	ko00000	-	-	-	AAA,AAA_assoc_2,MgsA_C,UBA
BPChr11G05885	-1.09951	4.06076e-05	0.000883847	BPChr11G05885	2711.XP_006470365.1	0.0	1354.3	COG3158@1|root,2QPSA@2759|Eukaryota,37NM3@33090|Viridiplantae,3G8B6@35493|Streptophyta	35493|Streptophyta	P	Potassium transporter	HAK25	GO:0003674,GO:0005215,GO:0005575,GO:0005623,GO:0005886,GO:0006810,GO:0006811,GO:0006812,GO:0006813,GO:0008150,GO:0008324,GO:0009987,GO:0015075,GO:0015077,GO:0015079,GO:0015318,GO:0015672,GO:0016020,GO:0022857,GO:0022890,GO:0030001,GO:0034220,GO:0044464,GO:0046873,GO:0051179,GO:0051234,GO:0055085,GO:0071804,GO:0071805,GO:0071944,GO:0098655,GO:0098660,GO:0098662	-	ko:K03549	-	-	-	-	ko00000,ko02000	2.A.72	-	-	K_trans
BPChr05G26622	-1.09957	0.00207188	0.0214165	BPChr05G26622	3988.XP_002524726.1	1.4e-117	429.1	COG0670@1|root,KOG2322@2759|Eukaryota,37JCA@33090|Viridiplantae,3G72Y@35493|Streptophyta,4JJUK@91835|fabids	35493|Streptophyta	T	Belongs to the BI1 family	-	-	-	ko:K06890	-	-	-	-	ko00000	-	-	-	Bax1-I
BPChr04G00445	-1.10181	0.00182452	0.0194137	BPChr04G00445	3641.EOY21840	9.9e-113	413.3	COG5147@1|root,KOG0048@2759|Eukaryota,37P48@33090|Viridiplantae,3G85A@35493|Streptophyta	35493|Streptophyta	K	Myb-related protein	MYB31	GO:0000981,GO:0000988,GO:0000989,GO:0001067,GO:0001076,GO:0001101,GO:0001134,GO:0001135,GO:0003674,GO:0003676,GO:0003677,GO:0003700,GO:0005488,GO:0005575,GO:0005622,GO:0005623,GO:0005634,GO:0006355,GO:0006357,GO:0006950,GO:0006970,GO:0008150,GO:0008152,GO:0009058,GO:0009266,GO:0009409,GO:0009414,GO:0009415,GO:0009628,GO:0009651,GO:0009719,GO:0009723,GO:0009725,GO:0009733,GO:0009737,GO:0009751,GO:…	-	ko:K09422	-	-	-	-	ko00000,ko03000	-	-	-	Myb_DNA-binding
BPChr11G07085	-1.10233	1.46637e-09	8.54903e-08	BPChr11G07085	29760.VIT_14s0006g00430.t01	3.9e-110	404.4	COG2272@1|root,KOG1516@2759|Eukaryota,37HFQ@33090|Viridiplantae,3G82E@35493|Streptophyta	35493|Streptophyta	I	Isoprenylcysteine alpha-carbonyl methylesterase	-	GO:0000139,GO:0001101,GO:0003674,GO:0003824,GO:0005575,GO:0005622,GO:0005623,GO:0005737,GO:0005783,GO:0005789,GO:0005794,GO:0008150,GO:0008152,GO:0009056,GO:0009719,GO:0009725,GO:0009737,GO:0010033,GO:0010296,GO:0012505,GO:0016020,GO:0016787,GO:0016788,GO:0031090,GO:0031984,GO:0033993,GO:0042175,GO:0042221,GO:0043226,GO:0043227,GO:0043229,GO:0043231,GO:0044422,GO:0044424,GO:0044425,GO:0044431,GO:…	-	ko:K15889	ko00900,ko01120,ko01130,map00900,map01120,map01130	-	R09846	RC00460,RC00461	ko00000,ko00001,ko01000	-	-	-	Abhydrolase_3,COesterase
BPChr08G05107	-1.10488	0.00115602	0.0135519	BPChr08G05107	85681.XP_006442161.1	8.1e-105	387.1	COG1028@1|root,KOG1208@2759|Eukaryota,37MT1@33090|Viridiplantae,3GBN6@35493|Streptophyta	35493|Streptophyta	Q	Belongs to the short-chain dehydrogenases reductases (SDR) family	-	-	1.1.1.184,1.1.1.189,1.1.1.197	ko:K00079	ko00590,ko00790,ko00980,ko01100,ko05204,map00590,map00790,map00980,map01100,map05204	-	R02581,R02975,R04285,R09420	RC00154,RC00205,RC00823,RC01491	ko00000,ko00001,ko01000	-	-	-	adh_short
BPChr08G26672	-1.10498	8.55206e-09	4.39702e-07	BPChr08G26672	85681.XP_006442138.1	7.2e-173	613.6	COG5076@1|root,KOG1778@2759|Eukaryota,37NKM@33090|Viridiplantae,3G7VF@35493|Streptophyta	35493|Streptophyta	K	BTB POZ and TAZ domain-containing protein	-	GO:0000151,GO:0000302,GO:0001101,GO:0003674,GO:0005488,GO:0005515,GO:0005516,GO:0005575,GO:0005622,GO:0005623,GO:0005737,GO:0006355,GO:0006508,GO:0006511,GO:0006807,GO:0006950,GO:0006970,GO:0006979,GO:0007275,GO:0008150,GO:0008152,GO:0009056,GO:0009057,GO:0009266,GO:0009409,GO:0009553,GO:0009555,GO:0009628,GO:0009636,GO:0009651,GO:0009719,GO:0009723,GO:0009725,GO:0009751,GO:0009889,GO:0009987,GO:…	-	-	-	-	-	-	-	-	-	-	BTB,zf-TAZ
BPChr13G19850	-1.1051	0.000179651	0.00297229	BPChr13G19850	57918.XP_004306941.1	1.2e-58	233.8	2B65R@1|root,2S3J8@2759|Eukaryota,37WCX@33090|Viridiplantae,3GIE4@35493|Streptophyta,4JPVM@91835|fabids	35493|Streptophyta	S	Auxin responsive protein	-	GO:0005575,GO:0005622,GO:0005623,GO:0005634,GO:0008150,GO:0010029,GO:0043226,GO:0043227,GO:0043229,GO:0043231,GO:0044424,GO:0044464,GO:0048518,GO:0048580,GO:0048831,GO:0050789,GO:0050793,GO:0051094,GO:0051239,GO:0051240,GO:0065007,GO:1900055,GO:1900057,GO:1900140,GO:1905623,GO:2000024,GO:2000026	-	ko:K14488	ko04075,map04075	-	-	-	ko00000,ko00001	-	-	-	Auxin_inducible
BPChr01G26600	-1.10522	0.000334592	0.00498428	BPChr01G26600	225117.XP_009353339.1	6.8e-148	530.4	COG0665@1|root,KOG2820@2759|Eukaryota,37NAT@33090|Viridiplantae,3G7V3@35493|Streptophyta,4JDVH@91835|fabids	35493|Streptophyta	E	Sarcosine oxidase	-	GO:0003674,GO:0003824,GO:0008115,GO:0008150,GO:0008152,GO:0016491,GO:0016645,GO:0016647,GO:0055114	1.5.3.1,1.5.3.7	ko:K00306	ko00260,ko00310,ko01100,ko04146,map00260,map00310,map01100,map04146	-	R00610,R02204	RC00060,RC00083,RC00557	ko00000,ko00001,ko01000	-	-	-	DAO
BPChr11G07094	-1.10541	0.00133481	0.0151839	BPChr11G07094	3656.XP_008439134.1	1.7e-170	606.3	COG0515@1|root,KOG1187@2759|Eukaryota,37Q0C@33090|Viridiplantae,3G7S2@35493|Streptophyta,4JHZB@91835|fabids	35493|Streptophyta	T	receptor-like serine threonine-protein kinase	-	GO:0003674,GO:0003824,GO:0004672,GO:0004674,GO:0004675,GO:0004888,GO:0005575,GO:0005623,GO:0005886,GO:0006464,GO:0006468,GO:0006793,GO:0006796,GO:0006807,GO:0007154,GO:0007165,GO:0007166,GO:0007167,GO:0007178,GO:0008150,GO:0008152,GO:0009987,GO:0016020,GO:0016301,GO:0016310,GO:0016740,GO:0016772,GO:0016773,GO:0019199,GO:0019538,GO:0023052,GO:0036211,GO:0038023,GO:0043170,GO:0043412,GO:0044237,GO:…	-	-	-	-	-	-	-	-	-	-	Pkinase,Pkinase_Tyr
BPChr03G10913	-1.10573	0.00288913	0.0278519	BPChr03G10913	2711.XP_006479408.1	4.7e-237	827.0	COG0004@1|root,KOG0682@2759|Eukaryota,37JB1@33090|Viridiplantae,3GDR8@35493|Streptophyta	35493|Streptophyta	P	Ammonium transporter 1 member	-	GO:0003674,GO:0005215,GO:0005575,GO:0005623,GO:0005886,GO:0005887,GO:0005911,GO:0006810,GO:0006811,GO:0006812,GO:0008150,GO:0008324,GO:0008519,GO:0009506,GO:0015075,GO:0015291,GO:0015398,GO:0015695,GO:0015696,GO:0016020,GO:0016021,GO:0022804,GO:0022857,GO:0030054,GO:0031224,GO:0031226,GO:0034220,GO:0044425,GO:0044459,GO:0044464,GO:0051179,GO:0051234,GO:0055044,GO:0055085,GO:0071702,GO:0071705,GO:…	-	ko:K03320	-	-	-	-	ko00000,ko02000	1.A.11	-	-	Ammonium_transp
BPChr06G30757	-1.10665	0.00477964	0.0404617	BPChr06G30757	3750.XP_008343631.1	2.6e-75	289.7	COG1528@1|root,KOG2332@2759|Eukaryota,37KU9@33090|Viridiplantae,3G7TB@35493|Streptophyta,4JJ40@91835|fabids	35493|Streptophyta	P	Stores iron in a soluble, non-toxic, readily available form. Important for iron homeostasis. Iron is taken up in the ferrous form and deposited as ferric hydroxides after oxidation	-	GO:0000003,GO:0000041,GO:0000302,GO:0003006,GO:0003674,GO:0005488,GO:0005506,GO:0005575,GO:0005622,GO:0005623,GO:0005737,GO:0005739,GO:0006810,GO:0006811,GO:0006812,GO:0006826,GO:0006873,GO:0006875,GO:0006879,GO:0006880,GO:0006950,GO:0006979,GO:0007275,GO:0008150,GO:0008152,GO:0009507,GO:0009526,GO:0009532,GO:0009536,GO:0009570,GO:0009791,GO:0009908,GO:0009941,GO:0009987,GO:0010035,GO:0010038,GO:…	1.16.3.2	ko:K00522	ko04216,ko04217,ko04978,map04216,map04217,map04978	-	-	-	ko00000,ko00001,ko01000,ko04147	-	-	-	Ferritin
BPChr14G01859	-1.10727	3.02934e-05	0.000675873	BPChr14G01859	3649.evm.model.supercontig_21.145	2.3e-130	471.9	COG5147@1|root,KOG0048@2759|Eukaryota,37QB6@33090|Viridiplantae,3G8PE@35493|Streptophyta,3HZJZ@3699|Brassicales	35493|Streptophyta	K	Myb-like DNA-binding domain	-	GO:0000981,GO:0000988,GO:0000989,GO:0001067,GO:0001076,GO:0001101,GO:0001134,GO:0001135,GO:0003674,GO:0003676,GO:0003677,GO:0003700,GO:0005488,GO:0005575,GO:0005622,GO:0005623,GO:0005634,GO:0006355,GO:0006357,GO:0006950,GO:0006952,GO:0006970,GO:0008150,GO:0009414,GO:0009415,GO:0009605,GO:0009607,GO:0009617,GO:0009620,GO:0009628,GO:0009651,GO:0009719,GO:0009723,GO:0009725,GO:0009733,GO:0009737,GO:…	-	ko:K09422	-	-	-	-	ko00000,ko03000	-	-	-	Myb_DNA-binding
BPChr02G18989	-1.10743	0.002473	0.0246532	BPChr02G18989	981085.XP_010089107.1	1.6e-176	625.5	COG0637@1|root,KOG2914@2759|Eukaryota,37NBR@33090|Viridiplantae,3G9N1@35493|Streptophyta,4JMN8@91835|fabids	35493|Streptophyta	S	Haloacid dehalogenase-like hydrolase	-	GO:0003674,GO:0003824,GO:0005488,GO:0005515,GO:0005575,GO:0005622,GO:0005623,GO:0005737,GO:0006464,GO:0006468,GO:0006766,GO:0006767,GO:0006771,GO:0006793,GO:0006796,GO:0006807,GO:0008150,GO:0008152,GO:0009058,GO:0009110,GO:0009231,GO:0009987,GO:0016310,GO:0016311,GO:0016787,GO:0016788,GO:0016791,GO:0017144,GO:0018130,GO:0019538,GO:0034641,GO:0036211,GO:0042364,GO:0042578,GO:0042726,GO:0042727,GO:…	-	-	-	-	-	-	-	-	-	-	HAD_2
BPChr11G05719	-1.10856	0.00561673	0.0453342	BPChr11G05719	3760.EMJ18893	0.0	1664.8	KOG1959@1|root,KOG1958@2759|Eukaryota,37N3I@33090|Viridiplantae,3GARU@35493|Streptophyta,4JEA0@91835|fabids	35493|Streptophyta	G	alpha-mannosidase	MAN2A2	GO:0000139,GO:0003674,GO:0003824,GO:0004553,GO:0004559,GO:0004572,GO:0005575,GO:0005622,GO:0005623,GO:0005737,GO:0005768,GO:0005794,GO:0005802,GO:0005975,GO:0005996,GO:0006013,GO:0006464,GO:0006486,GO:0006487,GO:0006491,GO:0006517,GO:0006807,GO:0006950,GO:0006970,GO:0006972,GO:0008150,GO:0008152,GO:0009058,GO:0009059,GO:0009100,GO:0009101,GO:0009628,GO:0009651,GO:0009987,GO:0012505,GO:0015923,GO:…	3.2.1.114	ko:K01231	ko00510,ko00513,ko01100,map00510,map00513,map01100	M00075	R05984	-	ko00000,ko00001,ko00002,ko01000	-	-	-	Alpha-mann_mid,Glyco_hydro_38,Glyco_hydro_38C
BPChr05G04682	-1.10995	0.000300649	0.00457825	BPChr05G04682	3656.XP_008441132.1	8.4e-86	324.3	2CNGR@1|root,2QW71@2759|Eukaryota,37TK0@33090|Viridiplantae,3GDDH@35493|Streptophyta,4JW07@91835|fabids	35493|Streptophyta	S	f-box protein	-	GO:0006109,GO:0008150,GO:0009889,GO:0009890,GO:0009892,GO:0010565,GO:0019222,GO:0030656,GO:0031323,GO:0031324,GO:0031326,GO:0031327,GO:0043255,GO:0045912,GO:0046137,GO:0048519,GO:0048523,GO:0050789,GO:0050794,GO:0051193,GO:0051195,GO:0051196,GO:0051198,GO:0062012,GO:0062014,GO:0065007,GO:0080090,GO:2000082,GO:2000083	-	-	-	-	-	-	-	-	-	-	DUF295,F-box
BPChr11G06951	-1.1107	9.28504e-10	5.6839e-08	BPChr11G06951	3649.evm.model.supercontig_93.28	4.6e-62	245.0	COG5641@1|root,KOG1601@2759|Eukaryota,37TBV@33090|Viridiplantae,3GI8N@35493|Streptophyta,3HU9A@3699|Brassicales	35493|Streptophyta	K	Transcription factor	-	GO:0000976,GO:0000977,GO:0000981,GO:0001012,GO:0001067,GO:0001085,GO:0001101,GO:0001228,GO:0001678,GO:0003674,GO:0003676,GO:0003677,GO:0003682,GO:0003690,GO:0003700,GO:0005488,GO:0005515,GO:0005575,GO:0005622,GO:0005623,GO:0005634,GO:0005667,GO:0006139,GO:0006351,GO:0006355,GO:0006357,GO:0006366,GO:0006725,GO:0006807,GO:0006996,GO:0007154,GO:0007165,GO:0007275,GO:0007568,GO:0007623,GO:0008134,GO:…	-	-	-	-	-	-	-	-	-	-	GATA
BPChr09G20190	-1.11129	6.93762e-08	3.04029e-06	BPChr09G20190	29760.VIT_03s0091g00040.t01	5e-207	727.6	KOG1192@1|root,KOG1192@2759|Eukaryota,37T4R@33090|Viridiplantae,3GGD7@35493|Streptophyta	35493|Streptophyta	CG	Belongs to the UDP-glycosyltransferase family	-	-	2.4.1.210	ko:K08236	-	-	-	-	ko00000,ko01000,ko01003	-	GT1	-	UDPGT
BPChr11G26918	-1.11174	1.4556e-05	0.000358665	BPChr11G26918	2711.XP_006470276.1	4.5e-194	684.1	COG2223@1|root,2R19F@2759|Eukaryota,37NCY@33090|Viridiplantae,3GCAM@35493|Streptophyta	35493|Streptophyta	P	High affinity nitrate transporter	-	GO:0000325,GO:0001101,GO:0003674,GO:0005215,GO:0005575,GO:0005622,GO:0005623,GO:0005737,GO:0005773,GO:0005774,GO:0005886,GO:0006810,GO:0006811,GO:0006820,GO:0008150,GO:0008509,GO:0009705,GO:0009987,GO:0010035,GO:0010167,GO:0015075,GO:0015103,GO:0015112,GO:0015318,GO:0015698,GO:0015706,GO:0016020,GO:0022857,GO:0031090,GO:0034220,GO:0042221,GO:0043226,GO:0043227,GO:0043229,GO:0043231,GO:0044422,GO:…	-	ko:K02575	ko00910,map00910	M00615	-	-	ko00000,ko00001,ko00002,ko02000	2.A.1.8	-	-	MFS_1
BPChr09G20530	-1.11346	0.00102281	0.0122543	BPChr09G20530	102107.XP_008236924.1	2.7e-192	678.3	COG0465@1|root,KOG0743@2759|Eukaryota,37QVY@33090|Viridiplantae,3GF73@35493|Streptophyta,4JSEM@91835|fabids	35493|Streptophyta	O	Belongs to the AAA ATPase family	-	GO:0003674,GO:0003824,GO:0005575,GO:0005622,GO:0005623,GO:0005737,GO:0005739,GO:0005740,GO:0005743,GO:0006996,GO:0007005,GO:0008150,GO:0009987,GO:0016020,GO:0016043,GO:0016462,GO:0016787,GO:0016817,GO:0016818,GO:0016887,GO:0017004,GO:0017062,GO:0017111,GO:0019866,GO:0022607,GO:0031090,GO:0031966,GO:0031967,GO:0031975,GO:0033108,GO:0034551,GO:0034622,GO:0042623,GO:0043226,GO:0043227,GO:0043229,GO:…	-	ko:K08900	-	-	-	-	ko00000,ko03029	-	-	-	AAA,AAA_assoc
BPChr08G13330	-1.11378	0.00124588	0.0144155	BPChr08G13330	3641.EOY06042	1.5e-262	911.8	KOG2560@1|root,KOG2560@2759|Eukaryota,37RES@33090|Viridiplantae,3GGZ3@35493|Streptophyta	35493|Streptophyta	A	pre-mRNA-splicing factor	-	GO:0005575,GO:0005622,GO:0005623,GO:0005634,GO:0005681,GO:0032991,GO:0043226,GO:0043227,GO:0043229,GO:0043231,GO:0044422,GO:0044424,GO:0044428,GO:0044446,GO:0044464,GO:1990904	-	ko:K12819	ko03040,map03040	-	-	-	ko00000,ko00001,ko03041	-	-	-	Slu7
BPChr08G19113	-1.11488	0.00130287	0.0149076	BPChr08G19113	29760.VIT_03s0063g02340.t01	2.3e-68	265.8	28I7F@1|root,2QU5J@2759|Eukaryota,37RE6@33090|Viridiplantae,3GCNT@35493|Streptophyta	35493|Streptophyta	S	BURP domain-containing protein	-	-	-	-	-	-	-	-	-	-	-	-	BURP
BPChr11G18429	-1.11525	0.000263021	0.00409889	BPChr11G18429	29760.VIT_12s0059g02120.t01	4.5e-41	173.7	2D88I@1|root,2S5AW@2759|Eukaryota,37WEG@33090|Viridiplantae,3GKHS@35493|Streptophyta	35493|Streptophyta	-	-	-	-	-	-	-	-	-	-	-	-	-	-	-
BPChr08G03162	-1.11844	0.000894027	0.0110215	BPChr08G03162	3641.EOX99852	1.4e-178	632.5	2CMP5@1|root,2QR5D@2759|Eukaryota,37KNE@33090|Viridiplantae,3GB92@35493|Streptophyta	35493|Streptophyta	S	F-box protein	-	GO:0005575,GO:0005622,GO:0005623,GO:0005634,GO:0043226,GO:0043227,GO:0043229,GO:0043231,GO:0044424,GO:0044464	-	-	-	-	-	-	-	-	-	-	F-box-like,zf-MYND
BPChr08G03014	-1.11915	0.000394564	0.0057213	BPChr08G03014	3983.cassava4.1_034292m	6.9e-108	397.1	2CMYM@1|root,2QST5@2759|Eukaryota,37N05@33090|Viridiplantae,3G8ID@35493|Streptophyta,4JF94@91835|fabids	35493|Streptophyta	S	Glucuronoxylan 4-O-methyltransferase	-	GO:0005575,GO:0005622,GO:0005623,GO:0005737,GO:0005768,GO:0005794,GO:0005802,GO:0012505,GO:0031410,GO:0031982,GO:0031984,GO:0043226,GO:0043227,GO:0043229,GO:0043231,GO:0044422,GO:0044424,GO:0044431,GO:0044444,GO:0044446,GO:0044464,GO:0097708,GO:0098791	-	-	-	-	-	-	-	-	-	-	Polysacc_synt_4
BPChr10G15215	-1.12015	5.89767e-05	0.00119881	BPChr10G15215	3641.EOY32463	8.9e-140	504.2	28IY0@1|root,2QR9N@2759|Eukaryota,37JDG@33090|Viridiplantae,3GBM4@35493|Streptophyta	35493|Streptophyta	K	Bromodomain-containing protein	-	-	-	-	-	-	-	-	-	-	-	-	Bromodomain,Myb_DNA-binding
BPChr07G06566	-1.1212	0.00251762	0.0249583	BPChr07G06566	2711.XP_006468464.1	7.9e-186	656.8	KOG1192@1|root,KOG1192@2759|Eukaryota,37MYI@33090|Viridiplantae,3G8WS@35493|Streptophyta	35493|Streptophyta	CG	Belongs to the UDP-glycosyltransferase family	-	-	2.4.1.218	ko:K08237	-	-	-	-	ko00000,ko01000,ko01003	-	GT1	-	UDPGT
BPChr05G24306	-1.12402	3.73249e-06	0.000108	BPChr05G24306	3760.EMJ09662	6.2e-254	883.2	COG0025@1|root,KOG1965@2759|Eukaryota,37KWA@33090|Viridiplantae,3GC66@35493|Streptophyta,4JJT6@91835|fabids	35493|Streptophyta	P	Sodium hydrogen exchanger	NHX1	GO:0000325,GO:0003674,GO:0005215,GO:0005451,GO:0005575,GO:0005622,GO:0005623,GO:0005737,GO:0005773,GO:0005774,GO:0005886,GO:0006810,GO:0006811,GO:0006812,GO:0006813,GO:0006814,GO:0006873,GO:0006885,GO:0006950,GO:0006970,GO:0007275,GO:0008150,GO:0008324,GO:0009628,GO:0009651,GO:0009987,GO:0010107,GO:0010119,GO:0015075,GO:0015077,GO:0015078,GO:0015079,GO:0015081,GO:0015291,GO:0015297,GO:0015298,GO:…	-	ko:K14724	-	-	-	-	ko00000,ko02000	2.A.36.1.12,2.A.36.1.9	-	-	Na_H_Exchanger
BPChr01G00047	-1.1242	1.08144e-05	0.000277282	BPChr01G00047	3694.POPTR_0018s10550.1	3.8e-181	641.3	KOG1052@1|root,KOG1052@2759|Eukaryota,37PKD@33090|Viridiplantae,3GDRH@35493|Streptophyta,4JNED@91835|fabids	35493|Streptophyta	P	Glutamate-gated receptor that probably acts as non- selective cation channel	-	-	-	ko:K05387	-	-	-	-	ko00000,ko04040	1.A.10.1.10,1.A.10.1.18,1.A.10.1.7	-	-	ANF_receptor,Lig_chan,SBP_bac_3
BPChr04G27153	-1.12476	1.78411e-05	0.000425688	BPChr04G27153	3641.EOY13073	9.8e-161	573.2	28K1Y@1|root,2QQDZ@2759|Eukaryota,37R39@33090|Viridiplantae,3G9SN@35493|Streptophyta	35493|Streptophyta	S	bHLH-MYC and R2R3-MYB transcription factors N-terminal	-	-	-	-	-	-	-	-	-	-	-	-	bHLH-MYC_N
BPChr13G07714	-1.1252	0.00531158	0.0436146	BPChr13G07714	3983.cassava4.1_032482m	8.2e-207	726.5	KOG2714@1|root,KOG2714@2759|Eukaryota,37NPA@33090|Viridiplantae,3GETQ@35493|Streptophyta,4JMFS@91835|fabids	35493|Streptophyta	S	BTB POZ domain-containing protein	-	GO:0005575,GO:0005622,GO:0005623,GO:0005737,GO:0005829,GO:0006810,GO:0006886,GO:0008104,GO:0008150,GO:0015031,GO:0015833,GO:0033036,GO:0034613,GO:0042886,GO:0044424,GO:0044444,GO:0044464,GO:0045184,GO:0046907,GO:0051179,GO:0051234,GO:0051641,GO:0051649,GO:0070727,GO:0071702,GO:0071705	-	-	-	-	-	-	-	-	-	-	BTB_2
BPChr06G11094	-1.12603	0.00117698	0.0137319	BPChr06G11094	3641.EOY18662	4.8e-293	1013.4	28JYJ@1|root,2QTRP@2759|Eukaryota,37SKS@33090|Viridiplantae,3GXCH@35493|Streptophyta	35493|Streptophyta	K	Auxin response factors (ARFs) are transcriptional factors that bind specifically to the DNA sequence 5'-TGTCTC-3' found in the auxin-responsive promoter elements (AuxREs)	-	GO:0003674,GO:0003676,GO:0003700,GO:0003723,GO:0005488,GO:0005575,GO:0005622,GO:0005623,GO:0005634,GO:0006355,GO:0007275,GO:0007389,GO:0008150,GO:0009719,GO:0009725,GO:0009733,GO:0009889,GO:0009987,GO:0010033,GO:0010468,GO:0010556,GO:0019219,GO:0019222,GO:0022622,GO:0031323,GO:0031326,GO:0032501,GO:0032502,GO:0035198,GO:0042221,GO:0043226,GO:0043227,GO:0043229,GO:0043231,GO:0044424,GO:0044464,GO:…	-	-	-	-	-	-	-	-	-	-	Auxin_resp,B3
BPChr11G18768	-1.12655	2.62016e-07	1.02448e-05	BPChr11G18768	3988.XP_002534031.1	5.9e-37	160.6	KOG4197@1|root,KOG4197@2759|Eukaryota,37UI0@33090|Viridiplantae,3GJ1P@35493|Streptophyta,4JQ3R@91835|fabids	35493|Streptophyta	S	Uncharacterized protein At4g22758-like	-	-	-	-	-	-	-	-	-	-	-	-	-
BPChr12G08252	-1.12799	0.000635402	0.00837048	BPChr12G08252	3983.cassava4.1_009431m	7.8e-157	560.5	28IHX@1|root,2QQUT@2759|Eukaryota,37M8V@33090|Viridiplantae,3GDWN@35493|Streptophyta,4JMCJ@91835|fabids	35493|Streptophyta	S	UPF0496 protein	-	-	-	-	-	-	-	-	-	-	-	-	BPS1
BPChr09G08319	-1.13507	1.63912e-05	0.000396465	BPChr09G08319	3760.EMJ12700	7.6e-95	354.0	2CBKK@1|root,2QU3V@2759|Eukaryota,37HI6@33090|Viridiplantae,3GBTB@35493|Streptophyta,4JGCN@91835|fabids	35493|Streptophyta	S	Domain of unknown function (DUF4408)	-	-	-	-	-	-	-	-	-	-	-	-	DUF4408,DUF761
BPChr08G13235	-1.13729	4.38061e-06	0.000124185	BPChr08G13235	102107.XP_008224393.1	0.0	1201.0	COG0642@1|root,KOG0519@2759|Eukaryota,37JVJ@33090|Viridiplantae,3GCQ7@35493|Streptophyta,4JIW6@91835|fabids	35493|Streptophyta	T	May act early in the ethylene signal transduction pathway, possibly as an ethylene receptor, or as a regulator of the pathway	ETR2	GO:0003674,GO:0003824,GO:0004672,GO:0004674,GO:0005488,GO:0005515,GO:0005575,GO:0005622,GO:0005623,GO:0005737,GO:0005783,GO:0006464,GO:0006468,GO:0006793,GO:0006796,GO:0006807,GO:0008150,GO:0008152,GO:0009966,GO:0009968,GO:0009987,GO:0010104,GO:0010105,GO:0010646,GO:0010648,GO:0012505,GO:0016301,GO:0016310,GO:0016740,GO:0016772,GO:0016773,GO:0019538,GO:0023051,GO:0023057,GO:0036211,GO:0042562,GO:…	-	ko:K14509	ko04016,ko04075,map04016,map04075	-	-	-	ko00000,ko00001,ko01000	-	-	-	GAF,HATPase_c,HisKA,Response_reg
BPChr09G14463	-1.13766	1.85591e-08	9.11162e-07	BPChr09G14463	3649.evm.model.supercontig_192.24	5e-104	384.0	COG1028@1|root,KOG0725@2759|Eukaryota,37IGF@33090|Viridiplantae,3GEDI@35493|Streptophyta,3HNV1@3699|Brassicales	35493|Streptophyta	Q	Belongs to the short-chain dehydrogenases reductases (SDR) family	-	GO:0000166,GO:0003674,GO:0003824,GO:0004312,GO:0004316,GO:0005488,GO:0005575,GO:0005622,GO:0005623,GO:0005737,GO:0005829,GO:0006082,GO:0006575,GO:0006629,GO:0006631,GO:0006633,GO:0006725,GO:0006732,GO:0006760,GO:0006807,GO:0008150,GO:0008152,GO:0008610,GO:0009058,GO:0009987,GO:0016053,GO:0016491,GO:0016614,GO:0016616,GO:0016740,GO:0016746,GO:0016747,GO:0019752,GO:0030497,GO:0032787,GO:0034641,GO:…	-	-	-	-	-	-	-	-	-	-	adh_short
BPChr11G18675	-1.13795	0.000180445	0.00297788	BPChr11G18675	3750.XP_008343048.1	9.3e-98	362.8	KOG4067@1|root,KOG4067@2759|Eukaryota,37Q79@33090|Viridiplantae,3GCK1@35493|Streptophyta,4JKQJ@91835|fabids	35493|Streptophyta	S	Protein OPI10 homolog	-	-	-	-	-	-	-	-	-	-	-	-	DUF775
BPChr05G17494	-1.13943	0.00544208	0.0442895	BPChr05G17494	71139.XP_010054122.1	1e-71	276.2	COG5133@1|root,KOG3381@2759|Eukaryota,37PIV@33090|Viridiplantae,3G7HS@35493|Streptophyta	35493|Streptophyta	S	MIP18 family protein At1g68310-like	-	-	-	-	-	-	-	-	-	-	-	-	FeS_assembly_P
BPChr11G09356	-1.13957	0.00615254	0.0487944	BPChr11G09356	3885.XP_007157799.1	5.1e-14	83.2	COG1779@1|root,KOG2703@2759|Eukaryota,37HSI@33090|Viridiplantae,3GB7M@35493|Streptophyta,4JI2I@91835|fabids	35493|Streptophyta	KLT	Zinc finger protein	-	GO:0000086,GO:0000278,GO:0003674,GO:0005488,GO:0005515,GO:0005575,GO:0005622,GO:0005623,GO:0005634,GO:0005737,GO:0006950,GO:0007049,GO:0007154,GO:0008150,GO:0009267,GO:0009605,GO:0009743,GO:0009746,GO:0009749,GO:0009987,GO:0009991,GO:0010033,GO:0022402,GO:0031667,GO:0031668,GO:0031669,GO:0033554,GO:0034284,GO:0042221,GO:0042594,GO:0043226,GO:0043227,GO:0043229,GO:0043231,GO:0044424,GO:0044464,GO:…	-	ko:K06874	-	-	-	-	ko00000	-	-	-	zf-ZPR1
BPChr12G11494	-1.14029	6.11166e-08	2.70251e-06	BPChr12G11494	2711.XP_006472537.1	7.1e-128	463.8	COG3491@1|root,KOG0143@2759|Eukaryota,37RWD@33090|Viridiplantae,3G930@35493|Streptophyta	35493|Streptophyta	Q	Belongs to the iron ascorbate-dependent oxidoreductase family	-	-	-	-	-	-	-	-	-	-	-	-	2OG-FeII_Oxy,DIOX_N
BPChr03G02597	-1.14082	4.71851e-10	3.07079e-08	BPChr03G02597	3750.XP_008338725.1	4.8e-190	670.6	COG0123@1|root,KOG1343@2759|Eukaryota,37N54@33090|Viridiplantae,3GEM7@35493|Streptophyta,4JJEK@91835|fabids	35493|Streptophyta	B	histone deacetylase	-	GO:0003674,GO:0003824,GO:0005488,GO:0005515,GO:0005575,GO:0005622,GO:0005623,GO:0005634,GO:0005737,GO:0005829,GO:0006464,GO:0006476,GO:0006807,GO:0008092,GO:0008150,GO:0008152,GO:0009507,GO:0009536,GO:0009987,GO:0015631,GO:0016787,GO:0016810,GO:0016811,GO:0019213,GO:0019538,GO:0019899,GO:0019902,GO:0019903,GO:0033558,GO:0035601,GO:0036211,GO:0042903,GO:0043014,GO:0043170,GO:0043226,GO:0043227,GO:…	-	-	-	-	-	-	-	-	-	-	Hist_deacetyl
BPChr06G09474	-1.14371	5.12314e-05	0.00107219	BPChr06G09474	3760.EMJ12613	1.7e-245	855.1	KOG0255@1|root,KOG0255@2759|Eukaryota,37QAZ@33090|Viridiplantae,3G9AQ@35493|Streptophyta,4JKBV@91835|fabids	35493|Streptophyta	S	Organic cation carnitine transporter	-	GO:0000325,GO:0001101,GO:0003674,GO:0005215,GO:0005575,GO:0005622,GO:0005623,GO:0005737,GO:0005773,GO:0005774,GO:0006810,GO:0006811,GO:0006820,GO:0006950,GO:0007154,GO:0008150,GO:0008509,GO:0008514,GO:0009414,GO:0009415,GO:0009507,GO:0009534,GO:0009535,GO:0009536,GO:0009579,GO:0009605,GO:0009628,GO:0009705,GO:0009987,GO:0009991,GO:0010035,GO:0015075,GO:0015711,GO:0016020,GO:0016021,GO:0022857,GO:…	-	ko:K08202	ko05231,map05231	-	-	-	ko00000,ko00001,ko02000	2.A.1.19.2,2.A.1.19.3	-	-	Sugar_tr
BPChr07G09995	-1.14503	0.000438849	0.00618907	BPChr07G09995	3641.EOY29039	6.9e-212	743.4	COG0205@1|root,KOG2440@2759|Eukaryota,37JM8@33090|Viridiplantae,3GB5J@35493|Streptophyta	35493|Streptophyta	G	Catalyzes the phosphorylation of D-fructose 6-phosphate to fructose 1,6-bisphosphate by ATP, the first committing step of glycolysis	-	GO:0003674,GO:0003824,GO:0003872,GO:0005575,GO:0005622,GO:0005623,GO:0005737,GO:0005829,GO:0005975,GO:0006082,GO:0006090,GO:0006091,GO:0006096,GO:0006139,GO:0006163,GO:0006164,GO:0006165,GO:0006725,GO:0006732,GO:0006733,GO:0006753,GO:0006754,GO:0006757,GO:0006793,GO:0006796,GO:0006807,GO:0008150,GO:0008152,GO:0008443,GO:0009056,GO:0009058,GO:0009108,GO:0009117,GO:0009123,GO:0009124,GO:0009126,GO:…	2.7.1.11	ko:K00850	ko00010,ko00030,ko00051,ko00052,ko00680,ko01100,ko01110,ko01120,ko01130,ko01200,ko01230,ko03018,ko04152,ko05230,map00010,map00030,map00051,map00052,map00680,map01100,map01110,map01120,map01130,map01200,map01230,map03018,map04152,map05230	M00001,M00345	R00756,R03236,R03237,R03238,R03239,R04779	RC00002,RC00017	ko00000,ko00001,ko00002,ko01000,ko01009,ko03019	-	-	-	PFK
BPChr05G24749	-1.14531	7.79843e-14	9.14751e-12	BPChr05G24749	29760.VIT_07s0005g00250.t01	9.6e-60	236.9	KOG3158@1|root,KOG3158@2759|Eukaryota,37JDD@33090|Viridiplantae,3GE8A@35493|Streptophyta	35493|Streptophyta	O	negative regulation of cytokinin-activated signaling pathway	-	-	-	-	-	-	-	-	-	-	-	-	CS
BPChr09G20198	-1.14697	2.08026e-05	0.000486861	BPChr09G20198	3641.EOY31344	9.2e-140	503.4	arCOG02806@1|root,2QRGR@2759|Eukaryota,37HEW@33090|Viridiplantae,3GCHG@35493|Streptophyta	35493|Streptophyta	S	molybdate transporter	-	GO:0003674,GO:0005215,GO:0005575,GO:0005622,GO:0005623,GO:0005737,GO:0005739,GO:0005740,GO:0005773,GO:0006810,GO:0006811,GO:0006820,GO:0008150,GO:0008509,GO:0015075,GO:0015098,GO:0015103,GO:0015318,GO:0015689,GO:0015698,GO:0016020,GO:0022857,GO:0031090,GO:0031966,GO:0031967,GO:0031975,GO:0034220,GO:0043226,GO:0043227,GO:0043229,GO:0043231,GO:0044422,GO:0044424,GO:0044429,GO:0044444,GO:0044446,GO:…	-	-	-	-	-	-	-	-	-	-	MFS_MOT1
BPChr06G21435	-1.14759	2.77537e-11	2.15741e-09	BPChr06G21435	71139.XP_010033838.1	2e-284	984.6	COG0281@1|root,KOG1257@2759|Eukaryota,37JSE@33090|Viridiplantae,3G98C@35493|Streptophyta	35493|Streptophyta	C	malic enzyme	-	GO:0003674,GO:0003824,GO:0004470,GO:0004473,GO:0005488,GO:0005515,GO:0005575,GO:0005622,GO:0005623,GO:0005737,GO:0006082,GO:0006090,GO:0006108,GO:0006629,GO:0006631,GO:0006633,GO:0008150,GO:0008152,GO:0008270,GO:0008610,GO:0009058,GO:0009507,GO:0009536,GO:0009987,GO:0016043,GO:0016053,GO:0016491,GO:0016614,GO:0016615,GO:0016616,GO:0019752,GO:0022607,GO:0032787,GO:0042802,GO:0042803,GO:0043167,GO:…	1.1.1.40	ko:K00029	ko00620,ko00710,ko01100,ko01120,ko01200,map00620,map00710,map01100,map01120,map01200	M00169,M00172	R00216	RC00105	ko00000,ko00001,ko00002,ko01000	-	-	-	Malic_M,malic
BPChr05G22446	-1.14843	5.29194e-05	0.00109813	BPChr05G22446	102107.XP_008236252.1	9.3e-59	232.6	COG5023@1|root,KOG1376@2759|Eukaryota,37JG4@33090|Viridiplantae,3GBTX@35493|Streptophyta,4JRTY@91835|fabids	35493|Streptophyta	Z	Tubulin is the major constituent of microtubules. It binds two moles of GTP, one at an exchangeable site on the beta chain and one at a non-exchangeable site on the alpha chain	-	-	-	ko:K07374	ko04145,ko04210,ko04530,ko04540,ko05130,map04145,map04210,map04530,map04540,map05130	-	-	-	ko00000,ko00001,ko03019,ko03036,ko04147,ko04812	-	-	-	Tubulin,Tubulin_C
BPChr10G21757	-1.14854	2.29618e-05	0.000530424	BPChr10G21757	3847.GLYMA16G04190.4	7.4e-08	63.5	2E20F@1|root,2S99J@2759|Eukaryota,37XBC@33090|Viridiplantae,3GKXZ@35493|Streptophyta	35493|Streptophyta	S	metal ion binding	-	-	-	-	-	-	-	-	-	-	-	-	-
BPChr04G27143	-1.15033	5.77337e-08	2.5587e-06	BPChr04G27143	225117.XP_009340793.1	6.3e-173	614.0	COG0534@1|root,KOG1347@2759|Eukaryota,37QY1@33090|Viridiplantae,3G7SZ@35493|Streptophyta,4JF08@91835|fabids	35493|Streptophyta	V	MATE efflux family protein	-	GO:0002229,GO:0002239,GO:0003674,GO:0005215,GO:0006810,GO:0006855,GO:0006950,GO:0006952,GO:0008150,GO:0009605,GO:0009607,GO:0009636,GO:0015238,GO:0015893,GO:0022857,GO:0042221,GO:0042493,GO:0043207,GO:0050896,GO:0051179,GO:0051234,GO:0051704,GO:0051707,GO:0055085,GO:0098542	-	ko:K03327	-	-	-	-	ko00000,ko02000	2.A.66.1	-	-	MatE
BPChr06G29596	-1.15069	5.32037e-08	2.36865e-06	BPChr06G29596	3847.GLYMA16G08670.1	1.7e-32	144.8	2DZH4@1|root,2S714@2759|Eukaryota,37WNM@33090|Viridiplantae,3GKG1@35493|Streptophyta,4JQXA@91835|fabids	35493|Streptophyta	S	BEST Arabidopsis thaliana protein match is	-	-	-	-	-	-	-	-	-	-	-	-	-
BPChr02G25927	-1.15078	0.000106089	0.00191714	BPChr02G25927	102107.XP_008238921.1	2.2e-172	612.1	28HJ6@1|root,2QPX0@2759|Eukaryota,37HFM@33090|Viridiplantae,3G831@35493|Streptophyta,4JJXT@91835|fabids	35493|Streptophyta	S	Hydroxyproline-rich glycoprotein family protein	-	-	-	-	-	-	-	-	-	-	-	-	-
BPChr02G13174	-1.15142	0.00169644	0.0183803	BPChr02G13174	3641.EOY29267	1.1e-70	273.5	COG5641@1|root,KOG1601@2759|Eukaryota,37P0B@33090|Viridiplantae,3GBNA@35493|Streptophyta	35493|Streptophyta	K	Zinc finger protein CONSTANS-like	-	GO:0005575,GO:0005622,GO:0005623,GO:0005634,GO:0008150,GO:0009314,GO:0009416,GO:0009628,GO:0009909,GO:0043226,GO:0043227,GO:0043229,GO:0043231,GO:0044424,GO:0044464,GO:0048580,GO:0048831,GO:0050789,GO:0050793,GO:0050896,GO:0051239,GO:0065007,GO:2000026,GO:2000241	-	-	-	-	-	-	-	-	-	-	CCT,zf-B_box
BPChr04G06202	-1.15166	1.67437e-06	5.32455e-05	BPChr04G06202	85681.XP_006442314.1	7.1e-186	656.8	COG0142@1|root,KOG0776@2759|Eukaryota,37HS5@33090|Viridiplantae,3G78H@35493|Streptophyta	35493|Streptophyta	H	Belongs to the FPP GGPP synthase family	-	GO:0003674,GO:0003824,GO:0005575,GO:0005622,GO:0005623,GO:0005737,GO:0006732,GO:0008150,GO:0008152,GO:0009058,GO:0009108,GO:0009507,GO:0009532,GO:0009536,GO:0009570,GO:0009987,GO:0010236,GO:0016740,GO:0016765,GO:0042180,GO:0042181,GO:0043226,GO:0043227,GO:0043229,GO:0043231,GO:0044237,GO:0044249,GO:0044281,GO:0044283,GO:0044422,GO:0044424,GO:0044434,GO:0044435,GO:0044444,GO:0044446,GO:0044464,GO:…	2.5.1.84,2.5.1.85	ko:K05356	ko00900,ko01110,map00900,map01110	-	R07267,R09250,R09251	RC00279	ko00000,ko00001,ko01000,ko01006	-	-	-	polyprenyl_synt
BPChr08G01480	-1.15179	1.41542e-06	4.60576e-05	BPChr08G01480	29760.VIT_19s0090g01750.t01	1.1e-39	169.5	2CXBB@1|root,2S4KC@2759|Eukaryota,37VZQ@33090|Viridiplantae,3GKAF@35493|Streptophyta	35493|Streptophyta	-	-	-	-	-	-	-	-	-	-	-	-	-	-	A2L_zn_ribbon
BPChr08G11318	-1.1529	4.2955e-09	2.36361e-07	BPChr08G11318	85681.XP_006446489.1	2.2e-165	588.6	28K72@1|root,2QQSM@2759|Eukaryota,37PTC@33090|Viridiplantae,3GGYE@35493|Streptophyta	35493|Streptophyta	S	Belongs to the 'GDSL' lipolytic enzyme family	-	GO:0005575,GO:0005618,GO:0005623,GO:0005911,GO:0009505,GO:0009506,GO:0030054,GO:0030312,GO:0044464,GO:0055044,GO:0071944	-	-	-	-	-	-	-	-	-	-	Lipase_GDSL
BPChr14G12934	-1.15308	5.46773e-06	0.000152357	BPChr14G12934	3760.EMJ04843	8.3e-229	799.7	COG0793@1|root,2QQVV@2759|Eukaryota,37M5D@33090|Viridiplantae,3GFT6@35493|Streptophyta,4JF2S@91835|fabids	35493|Streptophyta	M	tail specific protease	-	GO:0003674,GO:0003824,GO:0004175,GO:0005575,GO:0006508,GO:0006807,GO:0008150,GO:0008152,GO:0008233,GO:0016020,GO:0016787,GO:0019538,GO:0043170,GO:0044238,GO:0070011,GO:0071704,GO:0140096,GO:1901564	3.4.21.102	ko:K03797	-	-	-	-	ko00000,ko01000,ko01002	-	-	-	PDZ,PDZ_2,Peptidase_S41
BPChr09G04000	-1.15353	0.000311533	0.00471244	BPChr09G04000	29760.VIT_03s0038g03220.t01	5.1e-105	387.9	2CMG7@1|root,2QQ9K@2759|Eukaryota,37REA@33090|Viridiplantae,3GC4M@35493|Streptophyta	35493|Streptophyta	S	lysM domain-containing GPI-anchored protein	-	GO:0003674,GO:0005488,GO:0005575,GO:0005623,GO:0005886,GO:0005911,GO:0008061,GO:0008144,GO:0009506,GO:0016020,GO:0030054,GO:0031224,GO:0031225,GO:0031226,GO:0044425,GO:0044459,GO:0044464,GO:0046658,GO:0055044,GO:0071944,GO:0097367	-	-	-	-	-	-	-	-	-	-	LysM
BPChr10G26223	-1.15606	0.00015743	0.00264484	BPChr10G26223	57918.XP_004295159.1	4.3e-143	514.2	COG0657@1|root,KOG1515@2759|Eukaryota,37MSW@33090|Viridiplantae,3GFNU@35493|Streptophyta,4JN81@91835|fabids	35493|Streptophyta	V	carboxylesterase 15	-	GO:0003674,GO:0003824,GO:0008150,GO:0008152,GO:0009056,GO:0016787	-	-	-	-	-	-	-	-	-	-	Abhydrolase_3
BPChr06G30677	-1.15817	0.00350208	0.0321172	BPChr06G30677	3750.XP_008343631.1	1.8e-75	290.0	COG1528@1|root,KOG2332@2759|Eukaryota,37KU9@33090|Viridiplantae,3G7TB@35493|Streptophyta,4JJ40@91835|fabids	35493|Streptophyta	P	Stores iron in a soluble, non-toxic, readily available form. Important for iron homeostasis. Iron is taken up in the ferrous form and deposited as ferric hydroxides after oxidation	-	GO:0000003,GO:0000041,GO:0000302,GO:0003006,GO:0003674,GO:0005488,GO:0005506,GO:0005575,GO:0005622,GO:0005623,GO:0005737,GO:0005739,GO:0006810,GO:0006811,GO:0006812,GO:0006826,GO:0006873,GO:0006875,GO:0006879,GO:0006880,GO:0006950,GO:0006979,GO:0007275,GO:0008150,GO:0008152,GO:0009507,GO:0009526,GO:0009532,GO:0009536,GO:0009570,GO:0009791,GO:0009908,GO:0009941,GO:0009987,GO:0010035,GO:0010038,GO:…	1.16.3.2	ko:K00522	ko04216,ko04217,ko04978,map04216,map04217,map04978	-	-	-	ko00000,ko00001,ko01000,ko04147	-	-	-	Ferritin
BPChr04G02716	-1.15992	1.65408e-07	6.83581e-06	BPChr04G02716	2711.XP_006493948.1	1.2e-117	429.5	COG1100@1|root,KOG1673@2759|Eukaryota,37SMJ@33090|Viridiplantae,3GAVU@35493|Streptophyta	35493|Streptophyta	S	Septum-promoting GTP-binding protein	-	GO:0000166,GO:0000910,GO:0001882,GO:0001883,GO:0003674,GO:0003824,GO:0003924,GO:0005488,GO:0005525,GO:0005575,GO:0005622,GO:0005623,GO:0005815,GO:0005816,GO:0005856,GO:0007049,GO:0007088,GO:0007096,GO:0007154,GO:0007165,GO:0007264,GO:0007265,GO:0007346,GO:0008104,GO:0008150,GO:0009987,GO:0010564,GO:0010973,GO:0015630,GO:0016462,GO:0016787,GO:0016817,GO:0016818,GO:0017076,GO:0017111,GO:0019001,GO:…	-	ko:K06682,ko:K07976	ko04111,map04111	-	-	-	ko00000,ko00001,ko04031	-	-	-	Ras
BPChr05G07773	-1.16219	0.00533336	0.0437318	BPChr05G07773	29760.VIT_05s0029g00470.t01	8.6e-88	331.3	2C1KR@1|root,2QS3H@2759|Eukaryota,37NWK@33090|Viridiplantae,3GG10@35493|Streptophyta	35493|Streptophyta	S	Myb-like protein X	-	-	-	-	-	-	-	-	-	-	-	-	-
BPChr10G03376	-1.16246	0.000772404	0.00979885	BPChr10G03376	102107.XP_008228022.1	6.5e-37	161.4	KOG1744@1|root,KOG1744@2759|Eukaryota,37VT4@33090|Viridiplantae,3GJDJ@35493|Streptophyta,4JPY8@91835|fabids	35493|Streptophyta	B	Belongs to the histone H2B family	-	-	-	ko:K11252	ko05034,ko05203,ko05322,map05034,map05203,map05322	-	-	-	ko00000,ko00001,ko03036,ko04147	-	-	-	Histone
BPChr08G16723	-1.16329	0.00153873	0.0170295	BPChr08G16723	3988.XP_002512669.1	1.9e-45	188.7	28PHQ@1|root,2RZR5@2759|Eukaryota,37UKT@33090|Viridiplantae,3GIXQ@35493|Streptophyta,4JPUQ@91835|fabids	35493|Streptophyta	K	ethylene-responsive transcription factor	-	GO:0001101,GO:0003674,GO:0003676,GO:0003677,GO:0003700,GO:0005488,GO:0006082,GO:0006355,GO:0006790,GO:0006807,GO:0006950,GO:0006970,GO:0008150,GO:0008152,GO:0009266,GO:0009409,GO:0009414,GO:0009415,GO:0009628,GO:0009651,GO:0009719,GO:0009723,GO:0009725,GO:0009737,GO:0009751,GO:0009753,GO:0009889,GO:0009891,GO:0009893,GO:0009987,GO:0010033,GO:0010035,GO:0010468,GO:0010556,GO:0010557,GO:0010604,GO:…	-	-	-	-	-	-	-	-	-	-	AP2
BPChr05G07468	-1.16468	5.48997e-05	0.00113458	BPChr05G07468	57918.XP_004290677.1	0.0	1837.0	2CMQ1@1|root,2QRBB@2759|Eukaryota,37HFC@33090|Viridiplantae,3G7M6@35493|Streptophyta,4JDRE@91835|fabids	35493|Streptophyta	S	mediator of RNA polymerase II transcription subunit	-	GO:0005575,GO:0005622,GO:0005623,GO:0005634,GO:0005654,GO:0006725,GO:0008150,GO:0008152,GO:0009698,GO:0009987,GO:0016020,GO:0016592,GO:0019222,GO:0019748,GO:0031323,GO:0031974,GO:0031981,GO:0032991,GO:0043226,GO:0043227,GO:0043229,GO:0043231,GO:0043233,GO:0043455,GO:0044237,GO:0044422,GO:0044424,GO:0044428,GO:0044446,GO:0044451,GO:0044464,GO:0050789,GO:0050794,GO:0065007,GO:0070013,GO:0071704,GO:…	-	-	-	-	-	-	-	-	-	-	-
BPChr03G18211	-1.16603	2.36657e-12	2.38963e-10	BPChr03G18211	3750.XP_008348973.1	1.7e-201	708.8	KOG0167@1|root,KOG0167@2759|Eukaryota,37I1K@33090|Viridiplantae,3GCSN@35493|Streptophyta,4JIAV@91835|fabids	35493|Streptophyta	S	RING-type E3 ubiquitin transferase	-	GO:0001101,GO:0003674,GO:0003824,GO:0004842,GO:0005102,GO:0005488,GO:0005515,GO:0005575,GO:0005622,GO:0005623,GO:0005634,GO:0005737,GO:0005886,GO:0006464,GO:0006807,GO:0008150,GO:0008152,GO:0009719,GO:0009725,GO:0009737,GO:0009987,GO:0010033,GO:0016020,GO:0016567,GO:0016740,GO:0019538,GO:0019787,GO:0032446,GO:0032870,GO:0033612,GO:0033993,GO:0036211,GO:0042221,GO:0043170,GO:0043226,GO:0043227,GO:…	-	-	-	-	-	-	-	-	-	-	Arm,U-box
BPChr11G14026	-1.1668	0.000197076	0.0032011	BPChr11G14026	102107.XP_008230540.1	3.7e-191	674.5	KOG1947@1|root,KOG1947@2759|Eukaryota,37KNZ@33090|Viridiplantae,3GCGA@35493|Streptophyta,4JFR0@91835|fabids	35493|Streptophyta	S	F-box LRR-repeat protein	-	-	-	ko:K10268	-	-	-	-	ko00000,ko04121	-	-	-	F-box,F-box-like,LRR_6
BPChr11G07078	-1.17025	0.000597502	0.00797851	BPChr11G07078	71139.XP_010053337.1	1.1e-153	549.7	COG0697@1|root,KOG1582@2759|Eukaryota,37KZ2@33090|Viridiplantae,3GDC8@35493|Streptophyta	35493|Streptophyta	G	UDP-galactose UDP-glucose transporter	-	GO:0000139,GO:0000295,GO:0003674,GO:0005215,GO:0005346,GO:0005575,GO:0005622,GO:0005623,GO:0005737,GO:0005783,GO:0005789,GO:0005794,GO:0006810,GO:0006811,GO:0006820,GO:0006862,GO:0008150,GO:0008509,GO:0008514,GO:0012505,GO:0015075,GO:0015215,GO:0015216,GO:0015605,GO:0015711,GO:0015748,GO:0015865,GO:0015868,GO:0015931,GO:0015932,GO:0016020,GO:0016021,GO:0022857,GO:0030173,GO:0030176,GO:0031090,GO:…	-	ko:K15277	-	-	-	-	ko00000,ko02000	2.A.7.11.5	-	-	UAA
BPChr01G22958	-1.17062	5.11395e-05	0.00107141	BPChr01G22958	3760.EMJ23766	4.8e-124	451.1	KOG4754@1|root,KOG4754@2759|Eukaryota,37ID6@33090|Viridiplantae,3G9NS@35493|Streptophyta,4JMSN@91835|fabids	35493|Streptophyta	G	Histidine phosphatase superfamily (branch 1)	-	-	-	-	-	-	-	-	-	-	-	-	His_Phos_1
BPChr10G04329	-1.17161	0.00163177	0.0178275	BPChr10G04329	29760.VIT_06s0004g03550.t01	1.8e-88	332.4	COG0685@1|root,2QR1E@2759|Eukaryota,37RD2@33090|Viridiplantae,3GADY@35493|Streptophyta	35493|Streptophyta	E	Belongs to the peroxidase family	APX1	GO:0000003,GO:0000302,GO:0003006,GO:0003674,GO:0003824,GO:0004130,GO:0004601,GO:0005575,GO:0005618,GO:0005622,GO:0005623,GO:0005737,GO:0005794,GO:0005829,GO:0005886,GO:0005911,GO:0006950,GO:0006970,GO:0006979,GO:0007275,GO:0008150,GO:0008152,GO:0009056,GO:0009266,GO:0009408,GO:0009506,GO:0009507,GO:0009532,GO:0009536,GO:0009570,GO:0009628,GO:0009636,GO:0009651,GO:0009719,GO:0009725,GO:0009735,GO:…	1.11.1.11	ko:K00434	ko00053,ko00480,map00053,map00480	-	R00644	RC00092	ko00000,ko00001,ko01000	-	-	-	peroxidase
BPChr11G14351	-1.17315	0.00562618	0.0453731	BPChr11G14351	3983.cassava4.1_034183m	7e-157	560.5	28NTZ@1|root,2QVDX@2759|Eukaryota,37SNE@33090|Viridiplantae,3GCC7@35493|Streptophyta,4JTBG@91835|fabids	35493|Streptophyta	S	WD repeat-containing protein	-	GO:0000003,GO:0000151,GO:0000152,GO:0003006,GO:0003674,GO:0003824,GO:0004842,GO:0005488,GO:0005515,GO:0005575,GO:0005622,GO:0005623,GO:0005634,GO:0005654,GO:0006139,GO:0006259,GO:0006281,GO:0006464,GO:0006725,GO:0006807,GO:0006950,GO:0006974,GO:0006996,GO:0007275,GO:0008150,GO:0008152,GO:0009314,GO:0009411,GO:0009416,GO:0009605,GO:0009628,GO:0009639,GO:0009640,GO:0009641,GO:0009642,GO:0009646,GO:…	2.3.2.27	ko:K10143	ko04115,ko04120,ko04712,map04115,map04120,map04712	-	-	-	ko00000,ko00001,ko01000,ko04121	-	-	-	WD40
BPChr06G29358	-1.17452	0.000149581	0.00252598	BPChr06G29358	3641.EOX95780	1.9e-28	131.3	2DZH4@1|root,2S714@2759|Eukaryota,37WNM@33090|Viridiplantae,3GKG1@35493|Streptophyta	35493|Streptophyta	S	BEST Arabidopsis thaliana protein match is	-	-	-	-	-	-	-	-	-	-	-	-	-
BPChr07G22615	-1.17503	2.20117e-07	8.78181e-06	BPChr07G22615	981085.XP_010099192.1	1.3e-108	399.4	28PX1@1|root,2QWJM@2759|Eukaryota,37KMK@33090|Viridiplantae,3GADS@35493|Streptophyta,4JEPS@91835|fabids	35493|Streptophyta	-	-	-	-	-	-	-	-	-	-	-	-	-	-	-
BPChr06G09471	-1.17606	1.65378e-07	6.83581e-06	BPChr06G09471	57918.XP_004294325.1	1.9e-253	881.7	28K9J@1|root,2QRZD@2759|Eukaryota,37KEC@33090|Viridiplantae,3GDVW@35493|Streptophyta,4JH9N@91835|fabids	35493|Streptophyta	K	Belongs to the GRAS family	-	-	-	-	-	-	-	-	-	-	-	-	GRAS
BPChr14G12784	-1.17679	4.69167e-06	0.000132048	BPChr14G12784	3641.EOY09478	1.2e-82	313.2	28KN0@1|root,2QT3I@2759|Eukaryota,37I0G@33090|Viridiplantae,3GBNY@35493|Streptophyta	35493|Streptophyta	-	-	-	-	-	-	-	-	-	-	-	-	-	-	-
BPChr06G08095	-1.17827	0.00228553	0.0232096	BPChr06G08095	102107.XP_008235431.1	1.9e-178	632.5	COG2124@1|root,KOG0156@2759|Eukaryota,37S1U@33090|Viridiplantae,3G8GF@35493|Streptophyta,4JFXH@91835|fabids	35493|Streptophyta	Q	Cytochrome p450	-	GO:0003674,GO:0003824,GO:0004497,GO:0005575,GO:0008150,GO:0008152,GO:0009058,GO:0009987,GO:0010035,GO:0010038,GO:0010039,GO:0016020,GO:0016491,GO:0016705,GO:0016709,GO:0019748,GO:0042221,GO:0044550,GO:0050896,GO:0051716,GO:0055114,GO:0070887,GO:0071241,GO:0071248,GO:0071281	1.14.14.19,1.14.14.32	ko:K00512	ko00140,ko01100,ko04913,ko04917,ko04927,ko04934,map00140,map01100,map04913,map04917,map04927,map04934	M00109,M00110	R02211,R03783,R04852,R04853,R08517,R08518	RC00607,RC00660,RC00923,RC01222	ko00000,ko00001,ko00002,ko00199,ko01000	-	-	-	p450
BPChr02G13192	-1.17932	0.00274252	0.0267412	BPChr02G13192	3641.EOY29267	2.5e-109	402.1	COG5641@1|root,KOG1601@2759|Eukaryota,37P0B@33090|Viridiplantae,3GBNA@35493|Streptophyta	35493|Streptophyta	K	Zinc finger protein CONSTANS-like	-	GO:0005575,GO:0005622,GO:0005623,GO:0005634,GO:0008150,GO:0009314,GO:0009416,GO:0009628,GO:0009909,GO:0043226,GO:0043227,GO:0043229,GO:0043231,GO:0044424,GO:0044464,GO:0048580,GO:0048831,GO:0050789,GO:0050793,GO:0050896,GO:0051239,GO:0065007,GO:2000026,GO:2000241	-	-	-	-	-	-	-	-	-	-	CCT,zf-B_box
BPChr01G23709	-1.18234	9.59787e-05	0.00176372	BPChr01G23709	3694.POPTR_0018s14920.1	8.7e-187	659.8	KOG2366@1|root,KOG2366@2759|Eukaryota,37MJ5@33090|Viridiplantae,3GCPI@35493|Streptophyta,4JIFA@91835|fabids	35493|Streptophyta	G	alpha-galactosidase	-	-	3.2.1.22	ko:K07407	ko00052,ko00561,ko00600,ko00603,map00052,map00561,map00600,map00603	-	R01101,R01103,R01104,R01194,R01329,R02926,R03634,R04019,R04470,R05549,R05961,R06091	RC00049,RC00059,RC00451	ko00000,ko00001,ko01000	-	-	-	Melibiase_2,Melibiase_2_C
BPChr13G07696	-1.18316	7.61019e-05	0.00146584	BPChr13G07696	3656.XP_008461273.1	1.2e-50	206.1	KOG3173@1|root,KOG3173@2759|Eukaryota,37UQX@33090|Viridiplantae,3GIVV@35493|Streptophyta,4JPJF@91835|fabids	35493|Streptophyta	S	Zinc finger A20 and AN1 domain-containing stress-associated protein	SAP1	GO:0001101,GO:0003674,GO:0003824,GO:0004842,GO:0005575,GO:0005622,GO:0005623,GO:0005634,GO:0006464,GO:0006807,GO:0006950,GO:0006970,GO:0008150,GO:0008152,GO:0009414,GO:0009415,GO:0009628,GO:0009987,GO:0010035,GO:0016567,GO:0016740,GO:0019538,GO:0019787,GO:0032446,GO:0036211,GO:0042221,GO:0043170,GO:0043226,GO:0043227,GO:0043229,GO:0043231,GO:0043412,GO:0044237,GO:0044238,GO:0044260,GO:0044267,GO:…	-	-	-	-	-	-	-	-	-	-	zf-A20,zf-AN1
BPChr07G22610	-1.18381	1.80023e-08	8.867e-07	BPChr07G22610	4432.XP_010278645.1	4.3e-112	412.1	KOG2756@1|root,KOG4198@1|root,KOG2756@2759|Eukaryota,KOG4198@2759|Eukaryota,37NR1@33090|Viridiplantae,3GAF2@35493|Streptophyta	35493|Streptophyta	T	Endonuclease Exonuclease phosphatase family protein	-	GO:0000287,GO:0003674,GO:0003676,GO:0003677,GO:0003697,GO:0003824,GO:0005488,GO:0005575,GO:0005622,GO:0005623,GO:0005634,GO:0005654,GO:0006139,GO:0006259,GO:0006281,GO:0006302,GO:0006725,GO:0006807,GO:0006950,GO:0006974,GO:0008081,GO:0008150,GO:0008152,GO:0009987,GO:0016604,GO:0016605,GO:0016787,GO:0016788,GO:0030145,GO:0031974,GO:0031981,GO:0033554,GO:0034641,GO:0042578,GO:0043167,GO:0043169,GO:…	-	ko:K19619	-	-	-	-	ko00000,ko01000,ko03400	-	-	-	Exo_endo_phos,zf-RanBP
BPChr01G19713	-1.18621	4.36305e-05	0.000941275	BPChr01G19713	3988.XP_002531235.1	2e-199	701.8	28KC0@1|root,2QST1@2759|Eukaryota,37SDW@33090|Viridiplantae,3GDPP@35493|Streptophyta,4JE8Q@91835|fabids	35493|Streptophyta	G	GDP-fucose protein O-fucosyltransferase	-	-	-	-	-	-	-	-	-	-	-	-	O-FucT
BPChr05G14664	-1.18698	0.00147622	0.0164492	BPChr05G14664	2711.XP_006466231.1	1.5e-137	496.1	COG0657@1|root,KOG1515@2759|Eukaryota,37KMI@33090|Viridiplantae,3GBJJ@35493|Streptophyta	35493|Streptophyta	V	Carboxylesterase	-	GO:0000003,GO:0000902,GO:0000904,GO:0003006,GO:0003674,GO:0003824,GO:0008150,GO:0008152,GO:0009056,GO:0009653,GO:0009826,GO:0009856,GO:0009860,GO:0009932,GO:0009987,GO:0016043,GO:0016049,GO:0016787,GO:0016788,GO:0022414,GO:0030154,GO:0032501,GO:0032502,GO:0032989,GO:0040007,GO:0044706,GO:0048468,GO:0048588,GO:0048589,GO:0048856,GO:0048868,GO:0048869,GO:0051704,GO:0052689,GO:0060560,GO:0071840	-	ko:K07874,ko:K14493	ko04075,ko05134,map04075,map05134	-	-	-	ko00000,ko00001,ko01000,ko04031,ko04131,ko04147	-	-	-	Abhydrolase_3
BPChr04G23802	-1.18746	0.00256497	0.0253483	BPChr04G23802	981085.XP_010102503.1	1.5e-72	280.4	2EBMW@1|root,2SHPP@2759|Eukaryota,37YR2@33090|Viridiplantae,3GGEZ@35493|Streptophyta,4JTT0@91835|fabids	35493|Streptophyta	S	UBA-like domain (DUF1421)	-	-	-	-	-	-	-	-	-	-	-	-	DUF1421
BPChr04G21878	-1.18778	0.00433289	0.037607	BPChr04G21878	29760.VIT_19s0090g00440.t01	7.8e-169	600.9	2CMEB@1|root,2QQ47@2759|Eukaryota,37RAI@33090|Viridiplantae,3GBGE@35493|Streptophyta	35493|Streptophyta	S	HAUS augmin-like complex subunit 4	-	GO:0003674,GO:0005488,GO:0005515,GO:0005575,GO:0005622,GO:0005623,GO:0005819,GO:0005856,GO:0005874,GO:0005876,GO:0008017,GO:0008092,GO:0015630,GO:0015631,GO:0043226,GO:0043228,GO:0043229,GO:0043232,GO:0044422,GO:0044424,GO:0044430,GO:0044446,GO:0044464,GO:0051011,GO:0099080,GO:0099081,GO:0099512,GO:0099513	-	ko:K16587	-	-	-	-	ko00000,ko03036	-	-	-	HAUS4
BPChr11G14020	-1.18793	4.46522e-07	1.67245e-05	BPChr11G14020	3694.POPTR_0005s06540.1	6.3e-178	630.6	COG2124@1|root,KOG0157@2759|Eukaryota,37JT4@33090|Viridiplantae,3GEZ0@35493|Streptophyta,4JS32@91835|fabids	35493|Streptophyta	Q	Cytochrome p450	-	-	-	-	-	-	-	-	-	-	-	-	p450
BPChr11G05753	-1.18901	0.00415806	0.0364929	BPChr11G05753	3760.EMJ16773	8.3e-127	460.3	2CURR@1|root,2QQZ8@2759|Eukaryota,37KQJ@33090|Viridiplantae,3G7K3@35493|Streptophyta,4JHIW@91835|fabids	35493|Streptophyta	S	Protein of unknown function (DUF760)	-	-	-	-	-	-	-	-	-	-	-	-	DUF760
BPChr08G16635	-1.18928	0.000772843	0.00979885	BPChr08G16635	3659.XP_004145628.1	0.0	1085.5	COG0513@1|root,KOG0333@2759|Eukaryota,37HJW@33090|Viridiplantae,3GACH@35493|Streptophyta,4JS7S@91835|fabids	35493|Streptophyta	A	Belongs to the DEAD box helicase family	-	GO:0000375,GO:0003674,GO:0003724,GO:0003824,GO:0004004,GO:0004386,GO:0005575,GO:0005622,GO:0005623,GO:0005634,GO:0005681,GO:0005682,GO:0005730,GO:0005737,GO:0006139,GO:0006396,GO:0006725,GO:0006807,GO:0008026,GO:0008150,GO:0008152,GO:0008186,GO:0008380,GO:0009987,GO:0010467,GO:0010501,GO:0016070,GO:0016462,GO:0016787,GO:0016817,GO:0016818,GO:0016887,GO:0017111,GO:0030532,GO:0031974,GO:0031981,GO:…	3.6.4.13	ko:K12858	ko03040,map03040	M00354	-	-	ko00000,ko00001,ko00002,ko01000,ko03041	-	-	-	DEAD,Helicase_C
BPChr03G18535	-1.18937	2.65508e-11	2.07213e-09	BPChr03G18535	3988.XP_002513757.1	1.8e-279	968.0	COG4638@1|root,2QS20@2759|Eukaryota,37QNK@33090|Viridiplantae,3G9D1@35493|Streptophyta,4JM54@91835|fabids	35493|Streptophyta	P	Chlorophyllide a oxygenase	-	GO:0003674,GO:0003824,GO:0004497,GO:0005575,GO:0005622,GO:0005623,GO:0005737,GO:0006725,GO:0006778,GO:0006779,GO:0006807,GO:0008150,GO:0008152,GO:0009058,GO:0009507,GO:0009526,GO:0009528,GO:0009534,GO:0009535,GO:0009536,GO:0009579,GO:0009706,GO:0009941,GO:0009987,GO:0010277,GO:0015994,GO:0015995,GO:0016020,GO:0016491,GO:0016701,GO:0016703,GO:0018130,GO:0019438,GO:0019866,GO:0031090,GO:0031967,GO:…	1.14.13.122	ko:K13600	ko00860,ko01100,ko01110,map00860,map01100,map01110	-	R08203,R08204,R10080	RC00116,RC00269,RC00769	ko00000,ko00001,ko01000	-	-	-	PaO,Rieske
BPChr01G20354	-1.19141	6.04632e-05	0.0012223	BPChr01G20354	29760.VIT_18s0041g00280.t01	0.0	1431.0	KOG1981@1|root,KOG1981@2759|Eukaryota,37SAY@33090|Viridiplantae,3GHJH@35493|Streptophyta	35493|Streptophyta	T	T-complex protein 11	-	-	-	-	-	-	-	-	-	-	-	-	Tcp11
BPChr06G08568	-1.19185	1.50464e-05	0.000368891	BPChr06G08568	3983.cassava4.1_001607m	0.0	1187.6	COG0443@1|root,KOG0103@2759|Eukaryota,37PNW@33090|Viridiplantae,3GC36@35493|Streptophyta,4JN0R@91835|fabids	35493|Streptophyta	O	Belongs to the heat shock protein 70 family	-	GO:0000166,GO:0003674,GO:0005488,GO:0005524,GO:0005575,GO:0005618,GO:0005622,GO:0005623,GO:0005634,GO:0005737,GO:0005829,GO:0005886,GO:0005911,GO:0006950,GO:0008144,GO:0008150,GO:0009266,GO:0009408,GO:0009506,GO:0009628,GO:0010035,GO:0010038,GO:0016020,GO:0017076,GO:0030054,GO:0030312,GO:0030554,GO:0032553,GO:0032555,GO:0032559,GO:0035639,GO:0036094,GO:0042221,GO:0043167,GO:0043168,GO:0043226,GO:…	-	ko:K09489	ko04530,ko04612,map04530,map04612	-	-	-	ko00000,ko00001,ko03110	1.A.33	-	-	HSP70,MreB_Mbl
BPChr07G32010	-1.19198	5.03817e-08	2.25842e-06	BPChr07G32010	3760.EMJ14320	4.8e-71	275.0	2BK1Y@1|root,2RYXV@2759|Eukaryota,37VZB@33090|Viridiplantae,3GKNR@35493|Streptophyta,4JU0F@91835|fabids	35493|Streptophyta	O	Prokaryotic RING finger family 4	-	-	-	-	-	-	-	-	-	-	-	-	zf-C3HC4_3
BPChr11G04421	-1.1926	0.00246978	0.0246337	BPChr11G04421	102107.XP_008230164.1	1.6e-193	682.2	28K9J@1|root,2QR1S@2759|Eukaryota,37K39@33090|Viridiplantae,3GEN8@35493|Streptophyta,4JIVM@91835|fabids	35493|Streptophyta	K	Belongs to the GRAS family	-	-	-	-	-	-	-	-	-	-	-	-	GRAS
BPChr14G26010	-1.1971	5.56603e-05	0.0011441	BPChr14G26010	3760.EMJ05160	2.6e-127	462.6	2BYXR@1|root,2QTZX@2759|Eukaryota,37Q49@33090|Viridiplantae,3GAEG@35493|Streptophyta,4JGTQ@91835|fabids	35493|Streptophyta	-	-	-	-	-	-	-	-	-	-	-	-	-	-	-
BPChr02G18964	-1.19715	6.85162e-06	0.000184617	BPChr02G18964	3988.XP_002509838.1	1.9e-70	271.9	KOG0800@1|root,KOG0800@2759|Eukaryota,37U59@33090|Viridiplantae,3GI3G@35493|Streptophyta,4JP7Y@91835|fabids	35493|Streptophyta	O	E3 ubiquitin-protein ligase	-	GO:0003674,GO:0003824,GO:0004842,GO:0006464,GO:0006508,GO:0006511,GO:0006807,GO:0008150,GO:0008152,GO:0009056,GO:0009057,GO:0009987,GO:0010033,GO:0010035,GO:0010038,GO:0010200,GO:0010243,GO:0010498,GO:0016567,GO:0016740,GO:0019538,GO:0019787,GO:0019941,GO:0030163,GO:0032446,GO:0036211,GO:0042221,GO:0042493,GO:0043161,GO:0043170,GO:0043412,GO:0043632,GO:0044237,GO:0044238,GO:0044248,GO:0044257,GO:…	-	ko:K16281	-	-	-	-	ko00000,ko04121	-	-	-	zf-RING_2
BPChr06G09435	-1.19733	4.54476e-10	2.96758e-08	BPChr06G09435	3649.evm.model.supercontig_1.398	6.6e-264	916.4	COG0443@1|root,KOG0101@2759|Eukaryota,37K68@33090|Viridiplantae,3GAQN@35493|Streptophyta,3HMZU@3699|Brassicales	35493|Streptophyta	O	heat shock	-	GO:0002020,GO:0003674,GO:0005488,GO:0005515,GO:0005575,GO:0005576,GO:0005618,GO:0005622,GO:0005623,GO:0005634,GO:0005737,GO:0005773,GO:0005774,GO:0005794,GO:0005829,GO:0005840,GO:0005886,GO:0005911,GO:0006950,GO:0008150,GO:0009266,GO:0009408,GO:0009506,GO:0009507,GO:0009536,GO:0009605,GO:0009607,GO:0009615,GO:0009628,GO:0010035,GO:0010038,GO:0012505,GO:0016020,GO:0016363,GO:0019899,GO:0022626,GO:…	-	ko:K03283	ko03040,ko04010,ko04141,ko04144,ko04213,ko04612,ko04915,ko05134,ko05145,ko05162,ko05164,ko05169,map03040,map04010,map04141,map04144,map04213,map04612,map04915,map05134,map05145,map05162,map05164,map05169	M00353,M00355	-	-	ko00000,ko00001,ko00002,ko01009,ko03009,ko03029,ko03041,ko03051,ko03110,ko04131,ko04147,ko04516	1.A.33.1	-	-	HSP70
BPChr03G02457	-1.19752	0.00325749	0.0304587	BPChr03G02457	102107.XP_008242763.1	1.8e-202	711.8	KOG0799@1|root,KOG0799@2759|Eukaryota,37Q54@33090|Viridiplantae,3G8FS@35493|Streptophyta,4JH43@91835|fabids	35493|Streptophyta	G	Xylosyltransferase	-	GO:0006029,GO:0006807,GO:0008150,GO:0008152,GO:0009058,GO:0009059,GO:0009100,GO:0009101,GO:0009987,GO:0015012,GO:0019538,GO:0030166,GO:0030201,GO:0034645,GO:0043170,GO:0044237,GO:0044238,GO:0044249,GO:0044260,GO:0050650,GO:0050654,GO:0071704,GO:1901135,GO:1901137,GO:1901564,GO:1901566,GO:1901576	-	ko:K20891	-	-	-	-	ko00000,ko01000,ko01003	-	GT14	-	Branch
BPChr10G21579	-1.19769	6.97956e-10	4.39623e-08	BPChr10G21579	225117.XP_009375525.1	2.2e-133	481.9	28K47@1|root,2QSIR@2759|Eukaryota,37NIT@33090|Viridiplantae,3GB4M@35493|Streptophyta,4JMXS@91835|fabids	35493|Streptophyta	S	Belongs to the sterol desaturase family	-	GO:0006629,GO:0006720,GO:0006721,GO:0008150,GO:0008152,GO:0008299,GO:0008610,GO:0009058,GO:0009987,GO:0016108,GO:0016109,GO:0016114,GO:0016116,GO:0016117,GO:0016122,GO:0016123,GO:0042440,GO:0044237,GO:0044238,GO:0044249,GO:0044255,GO:0046148,GO:0071704,GO:1901576	1.14.15.24	ko:K15746	ko00906,ko01100,ko01110,map00906,map01100,map01110	M00372	R07530,R07558,R07559,R07561,R07562,R07568,R07569,R07570,R07572,R07851,R09747	RC00478,RC00704,RC02629	ko00000,ko00001,ko00002,ko01000	-	-	-	FA_hydroxylase
BPChr05G15021	-1.20088	0.00025954	0.0040511	BPChr05G15021	4432.XP_010254958.1	5.5e-167	594.0	COG0204@1|root,KOG1505@2759|Eukaryota,37HK0@33090|Viridiplantae,3GAJ0@35493|Streptophyta	35493|Streptophyta	I	1-acyl-sn-glycerol-3-phosphate acyltransferase	-	-	2.3.1.51	ko:K13513	ko00561,ko00564,ko01100,ko01110,map00561,map00564,map01100,map01110	M00089	R02241,R09034,R09036,R09037,R09381	RC00004,RC00037,RC00039	ko00000,ko00001,ko00002,ko01000,ko01004	-	-	-	Acyltransf_C,Acyltransferase
BPChr04G00494	-1.20365	9.87419e-07	3.36392e-05	BPChr04G00494	2711.XP_006477464.1	5.1e-162	577.8	28K3S@1|root,2QSI8@2759|Eukaryota,37P6M@33090|Viridiplantae,3G85Z@35493|Streptophyta	35493|Streptophyta	K	Cyclic dof factor	-	GO:0003674,GO:0003700,GO:0006355,GO:0008150,GO:0009889,GO:0010468,GO:0010556,GO:0019219,GO:0019222,GO:0031323,GO:0031326,GO:0050789,GO:0050794,GO:0051171,GO:0051252,GO:0060255,GO:0065007,GO:0080090,GO:0140110,GO:1903506,GO:2000112,GO:2001141	-	ko:K16222	ko04712,map04712	-	-	-	ko00000,ko00001	-	-	-	zf-Dof
BPChr05G31484	-1.20366	0.00236776	0.0238223	BPChr05G31484	3750.XP_008350630.1	1.7e-80	306.2	2CN76@1|root,2QUAW@2759|Eukaryota,37RVQ@33090|Viridiplantae,3GGTZ@35493|Streptophyta,4JMHI@91835|fabids	35493|Streptophyta	S	Mediator-associated protein	-	GO:0003674,GO:0003676,GO:0003677,GO:0005488,GO:0006355,GO:0008150,GO:0009889,GO:0010468,GO:0010556,GO:0019219,GO:0019222,GO:0031323,GO:0031326,GO:0043565,GO:0050789,GO:0050794,GO:0051171,GO:0051252,GO:0060255,GO:0065007,GO:0080090,GO:0097159,GO:1901363,GO:1903506,GO:2000112,GO:2001141	-	-	-	-	-	-	-	-	-	-	DUF573
BPChr09G20109	-1.20985	6.52401e-09	3.43545e-07	BPChr09G20109	3649.evm.model.supercontig_62.4	4.9e-118	431.0	2C7YN@1|root,2QPP6@2759|Eukaryota,37MD8@33090|Viridiplantae,3G9T4@35493|Streptophyta,3HY1Z@3699|Brassicales	35493|Streptophyta	K	DNA binding protein binding transcription activator transcription factor	ABF1	GO:0000976,GO:0001067,GO:0001101,GO:0003674,GO:0003676,GO:0003677,GO:0003690,GO:0003700,GO:0005488,GO:0005575,GO:0005622,GO:0005623,GO:0005634,GO:0006355,GO:0006950,GO:0006970,GO:0007154,GO:0007165,GO:0008150,GO:0009414,GO:0009415,GO:0009628,GO:0009651,GO:0009719,GO:0009725,GO:0009737,GO:0009738,GO:0009755,GO:0009787,GO:0009789,GO:0009889,GO:0009966,GO:0009967,GO:0009987,GO:0010033,GO:0010035,GO:…	-	ko:K14432	ko04075,map04075	-	-	-	ko00000,ko00001,ko03000	-	-	-	bZIP_1
BPChr06G29383	-1.21519	3.4441e-09	1.92212e-07	BPChr06G29383	2711.XP_006491371.1	5.7e-171	607.8	COG5641@1|root,KOG1601@2759|Eukaryota,37R8H@33090|Viridiplantae,3G75E@35493|Streptophyta	35493|Streptophyta	K	Two-component response regulator-like	-	GO:0003674,GO:0003676,GO:0003677,GO:0005488,GO:0006355,GO:0007154,GO:0007165,GO:0007623,GO:0008150,GO:0009314,GO:0009416,GO:0009628,GO:0009639,GO:0009889,GO:0009890,GO:0009892,GO:0009987,GO:0010017,GO:0010468,GO:0010556,GO:0010558,GO:0010605,GO:0010629,GO:0019219,GO:0019222,GO:0023052,GO:0031323,GO:0031324,GO:0031326,GO:0031327,GO:0045892,GO:0045934,GO:0048511,GO:0048519,GO:0048523,GO:0050789,GO:…	-	ko:K12128,ko:K12130	ko04712,map04712	-	-	-	ko00000,ko00001	-	-	-	CCT,Response_reg
BPChr10G15269	-1.21657	1.11962e-11	9.79114e-10	BPChr10G15269	981085.XP_010093162.1	1.8e-161	575.9	COG0053@1|root,KOG1485@2759|Eukaryota,37PN0@33090|Viridiplantae,3G9SF@35493|Streptophyta,4JDAA@91835|fabids	35493|Streptophyta	P	Metal tolerance protein	-	-	-	-	-	-	-	-	-	-	-	-	Cation_efflux,ZT_dimer
BPChr12G08357	-1.2209	0.00513851	0.0425977	BPChr12G08357	57918.XP_004290589.1	3.1e-96	358.2	KOG1623@1|root,KOG1623@2759|Eukaryota,37I7C@33090|Viridiplantae,3G79V@35493|Streptophyta,4JFCG@91835|fabids	35493|Streptophyta	U	Mediates both low-affinity uptake and efflux of sugar across the membrane	-	GO:0003674,GO:0005215,GO:0005575,GO:0005622,GO:0005623,GO:0005737,GO:0005783,GO:0005789,GO:0005886,GO:0005887,GO:0006810,GO:0008150,GO:0008643,GO:0009987,GO:0012505,GO:0015144,GO:0016020,GO:0016021,GO:0016043,GO:0022607,GO:0022857,GO:0031224,GO:0031226,GO:0031984,GO:0034219,GO:0042175,GO:0043226,GO:0043227,GO:0043229,GO:0043231,GO:0043933,GO:0044085,GO:0044422,GO:0044424,GO:0044425,GO:0044432,GO:…	-	ko:K15382	-	-	-	-	ko00000,ko02000	9.A.58.1	-	-	MtN3_slv
BPChr09G08187	-1.22224	0.000192879	0.00315121	BPChr09G08187	2711.XP_006486988.1	4.7e-105	387.5	28N64@1|root,2QURC@2759|Eukaryota,37NKR@33090|Viridiplantae,3GDPZ@35493|Streptophyta	35493|Streptophyta	S	Secretory protein	-	-	-	-	-	-	-	-	-	-	-	-	BSP
BPChr14G19667	-1.22334	0.000660033	0.00863109	BPChr14G19667	3760.EMJ06020	4.3e-90	337.8	COG3148@1|root,KOG4382@2759|Eukaryota,37TJT@33090|Viridiplantae,3GBE4@35493|Streptophyta,4JM2B@91835|fabids	35493|Streptophyta	S	DTW domain-containing protein	-	-	-	-	-	-	-	-	-	-	-	-	DTW
BPChr06G29625	-1.22497	5.49074e-05	0.00113458	BPChr06G29625	3641.EOX95607	5.5e-252	876.7	COG3424@1|root,2QPKZ@2759|Eukaryota,37QQP@33090|Viridiplantae,3G7B3@35493|Streptophyta	35493|Streptophyta	I	3-ketoacyl-coa synthase	KCS1	GO:0003674,GO:0003824,GO:0004312,GO:0005575,GO:0005622,GO:0005623,GO:0005737,GO:0005783,GO:0005829,GO:0005840,GO:0006950,GO:0008150,GO:0008152,GO:0009058,GO:0009266,GO:0009314,GO:0009409,GO:0009416,GO:0009628,GO:0009922,GO:0010025,GO:0010166,GO:0012505,GO:0016020,GO:0016740,GO:0016746,GO:0016747,GO:0022626,GO:0032991,GO:0043226,GO:0043227,GO:0043228,GO:0043229,GO:0043231,GO:0043232,GO:0044424,GO:…	2.3.1.199	ko:K15397	ko00062,ko01110,map00062,map01110	M00415	R09419,R10825	RC00004,RC02888,RC02997	ko00000,ko00001,ko00002,ko01000	-	-	-	ACP_syn_III_C,FAE1_CUT1_RppA
BPChr12G28116	-1.22503	1.35292e-18	2.36628e-16	BPChr12G28116	3641.EOY21005	2.1e-244	851.7	KOG4711@1|root,KOG4711@2759|Eukaryota,37SAD@33090|Viridiplantae,3GCE3@35493|Streptophyta	35493|Streptophyta	S	aluminum-activated malate transporter	-	GO:0000325,GO:0003674,GO:0005215,GO:0005216,GO:0005253,GO:0005310,GO:0005342,GO:0005575,GO:0005622,GO:0005623,GO:0005737,GO:0005773,GO:0005774,GO:0006810,GO:0006811,GO:0006820,GO:0006835,GO:0008150,GO:0008509,GO:0008514,GO:0009705,GO:0015075,GO:0015103,GO:0015140,GO:0015267,GO:0015318,GO:0015556,GO:0015698,GO:0015711,GO:0015740,GO:0015743,GO:0015849,GO:0016020,GO:0022803,GO:0022838,GO:0022857,GO:…	-	-	-	-	-	-	-	-	-	-	ALMT
BPChr08G05047	-1.22594	0.00203833	0.0211487	BPChr08G05047	102107.XP_008223014.1	9.1e-59	233.4	29JPR@1|root,2RRGD@2759|Eukaryota,37QPM@33090|Viridiplantae,3GHPH@35493|Streptophyta,4JTJP@91835|fabids	35493|Streptophyta	S	Ribosomal protein L34e superfamily protein	-	-	-	-	-	-	-	-	-	-	-	-	-
BPChr14G09139	-1.22664	0.000191704	0.00313464	BPChr14G09139	981085.XP_010107006.1	0.0	1318.5	2CMFA@1|root,2QQ73@2759|Eukaryota,37MAG@33090|Viridiplantae,3G8FH@35493|Streptophyta,4JI5T@91835|fabids	35493|Streptophyta	S	Digalactosyldiacylglycerol synthase 1	DGD1	GO:0001101,GO:0003674,GO:0003824,GO:0005575,GO:0005622,GO:0005623,GO:0005737,GO:0005739,GO:0006082,GO:0006629,GO:0006631,GO:0006633,GO:0006643,GO:0006664,GO:0006725,GO:0007154,GO:0007165,GO:0008150,GO:0008152,GO:0008194,GO:0008378,GO:0008610,GO:0009058,GO:0009247,GO:0009507,GO:0009526,GO:0009527,GO:0009536,GO:0009698,GO:0009699,GO:0009707,GO:0009719,GO:0009725,GO:0009753,GO:0009755,GO:0009808,GO:…	2.4.1.241	ko:K09480	ko00561,ko01100,map00561,map01100	-	R04469	RC00005,RC00059	ko00000,ko00001,ko01000,ko01003	-	GT4	-	Glyco_trans_1_4,Glycos_transf_1
BPChr02G13036	-1.22791	2.18868e-05	0.000508588	BPChr02G13036	3760.EMJ10519	9.3e-150	536.6	COG1266@1|root,2QR9S@2759|Eukaryota,37P8M@33090|Viridiplantae,3G8I9@35493|Streptophyta,4JHXH@91835|fabids	35493|Streptophyta	S	CAAX protease self-immunity	-	-	-	ko:K07052	-	-	-	-	ko00000	-	-	-	Abi
BPChr05G01325	-1.22841	2.83212e-05	0.00063622	BPChr05G01325	102107.XP_008234941.1	4e-213	748.0	COG0515@1|root,KOG1187@2759|Eukaryota,37MRA@33090|Viridiplantae,3GE7I@35493|Streptophyta,4JJD7@91835|fabids	35493|Streptophyta	T	LRR receptor-like serine threonine-protein kinase	-	GO:0003674,GO:0003824,GO:0004672,GO:0004674,GO:0005575,GO:0005623,GO:0005886,GO:0006464,GO:0006468,GO:0006793,GO:0006796,GO:0006807,GO:0008150,GO:0008152,GO:0009987,GO:0016020,GO:0016301,GO:0016310,GO:0016740,GO:0016772,GO:0016773,GO:0019538,GO:0036211,GO:0043170,GO:0043412,GO:0044237,GO:0044238,GO:0044260,GO:0044267,GO:0044464,GO:0071704,GO:0071944,GO:0140096,GO:1901564	-	-	-	-	-	-	-	-	-	-	Pkinase,Pkinase_Tyr
BPChr09G04829	-1.22959	0.00530564	0.0435957	BPChr09G04829	3694.POPTR_0017s02640.1	5.6e-274	950.3	COG0515@1|root,KOG1187@2759|Eukaryota,37K1S@33090|Viridiplantae,3G7RV@35493|Streptophyta,4JH6Q@91835|fabids	35493|Streptophyta	T	receptor-like protein kinase	-	GO:0003674,GO:0003824,GO:0004672,GO:0004674,GO:0005575,GO:0005623,GO:0005886,GO:0006464,GO:0006468,GO:0006793,GO:0006796,GO:0006807,GO:0008150,GO:0008152,GO:0009987,GO:0016020,GO:0016301,GO:0016310,GO:0016740,GO:0016772,GO:0016773,GO:0019538,GO:0036211,GO:0043170,GO:0043412,GO:0044237,GO:0044238,GO:0044260,GO:0044267,GO:0044464,GO:0071704,GO:0071944,GO:0140096,GO:1901564	-	-	-	-	-	-	-	-	-	-	Pkinase,Pkinase_Tyr
BPChr14G01844	-1.23029	4.88222e-05	0.00103281	BPChr14G01844	3659.XP_004137817.1	1.8e-110	406.4	KOG4265@1|root,KOG4265@2759|Eukaryota,37QCG@33090|Viridiplantae,3G7XR@35493|Streptophyta,4JGWT@91835|fabids	35493|Streptophyta	O	E3 ubiquitin-protein ligase	-	GO:0001101,GO:0003674,GO:0003824,GO:0004842,GO:0005575,GO:0005622,GO:0005623,GO:0005634,GO:0005737,GO:0005768,GO:0005769,GO:0005829,GO:0005886,GO:0006464,GO:0006513,GO:0006807,GO:0006810,GO:0007034,GO:0007041,GO:0007154,GO:0007165,GO:0008150,GO:0008152,GO:0008277,GO:0008333,GO:0008589,GO:0009719,GO:0009725,GO:0009737,GO:0009738,GO:0009755,GO:0009966,GO:0009968,GO:0009987,GO:0010033,GO:0010118,GO:…	2.3.2.27	ko:K10604	ko04120,map04120	-	-	-	ko00000,ko00001,ko01000,ko04121	-	-	-	zf-C3HC4_3
BPunChr33613	-1.23148	4.70378e-11	3.57141e-09	BPunChr33613	3760.EMJ04814	1.3e-52	214.5	KOG4197@1|root,KOG4197@2759|Eukaryota,37RUT@33090|Viridiplantae,3GC3I@35493|Streptophyta,4JKXI@91835|fabids	35493|Streptophyta	S	Pentatricopeptide repeat-containing protein	-	GO:0003674,GO:0003676,GO:0003723,GO:0003824,GO:0004518,GO:0004519,GO:0005488,GO:0005575,GO:0005622,GO:0005623,GO:0006139,GO:0006725,GO:0006807,GO:0008150,GO:0008152,GO:0009451,GO:0009987,GO:0016070,GO:0016787,GO:0016788,GO:0034641,GO:0043170,GO:0043226,GO:0043227,GO:0043229,GO:0043231,GO:0043412,GO:0044237,GO:0044238,GO:0044424,GO:0044464,GO:0046483,GO:0071704,GO:0090304,GO:0090305,GO:0097159,GO:…	-	ko:K17710	-	-	-	-	ko00000,ko03016,ko03029	-	-	-	PPR,PPR_1,PPR_2,PPR_3,Pkinase
BPChr13G21210	-1.23167	0.00262856	0.0257939	BPChr13G21210	3983.cassava4.1_006715m	1.2e-183	649.4	28K9J@1|root,2QPNC@2759|Eukaryota,37MW6@33090|Viridiplantae,3G7CB@35493|Streptophyta,4JSR2@91835|fabids	35493|Streptophyta	K	Belongs to the GRAS family	-	-	-	-	-	-	-	-	-	-	-	-	GRAS
BPChr03G29004	-1.23223	1.51783e-08	7.56561e-07	BPChr03G29004	102107.XP_008224951.1	1.8e-51	209.1	2BRI0@1|root,2S1WN@2759|Eukaryota,37VCY@33090|Viridiplantae,3GIRW@35493|Streptophyta,4JQ0V@91835|fabids	35493|Streptophyta	S	f-box protein	-	GO:0001101,GO:0006950,GO:0006970,GO:0008150,GO:0009605,GO:0009607,GO:0009611,GO:0009617,GO:0009628,GO:0009651,GO:0009719,GO:0009725,GO:0009737,GO:0009751,GO:0009753,GO:0009961,GO:0010033,GO:0010243,GO:0014070,GO:0033993,GO:0042221,GO:0042493,GO:0043200,GO:0043207,GO:0046677,GO:0050896,GO:0051704,GO:0051707,GO:0097305,GO:1901698,GO:1901700	-	-	-	-	-	-	-	-	-	-	F-box
BPChr02G23328	-1.2344	2.6176e-08	1.25064e-06	BPChr02G23328	29760.VIT_17s0000g00570.t01	6.7e-238	830.5	KOG2306@1|root,KOG2306@2759|Eukaryota,37RAA@33090|Viridiplantae,3GE5C@35493|Streptophyta	35493|Streptophyta	S	Chromosome segregation during meiosis	-	-	-	-	-	-	-	-	-	-	-	-	Chromosome_seg,DUF4210
BPChr12G28155	-1.23536	0.00193462	0.020353	BPChr12G28155	3760.EMJ10901	1.8e-41	176.0	KOG0667@1|root,KOG0670@2759|Eukaryota,37V8Y@33090|Viridiplantae,3GJVI@35493|Streptophyta,4JUJQ@91835|fabids	35493|Streptophyta	A	protein kinase activity	-	-	-	-	-	-	-	-	-	-	-	-	-
BPChr09G29664	-1.23573	5.57135e-10	3.56658e-08	BPChr09G29664	3983.cassava4.1_004032m	1e-259	902.5	COG3104@1|root,KOG1237@2759|Eukaryota,37P9U@33090|Viridiplantae,3GF3N@35493|Streptophyta,4JGVF@91835|fabids	35493|Streptophyta	E	Protein NRT1 PTR FAMILY	-	GO:0005575,GO:0005622,GO:0005623,GO:0005886,GO:0008150,GO:0010336,GO:0016020,GO:0031982,GO:0042592,GO:0043226,GO:0043227,GO:0043229,GO:0044424,GO:0044464,GO:0048878,GO:0050801,GO:0055081,GO:0055088,GO:0065007,GO:0065008,GO:0071944,GO:0097708	-	ko:K14638	-	-	-	-	ko00000,ko02000	2.A.17.3	-	-	PTR2
BPChr14G17387	-1.23671	1.4e-06	4.57076e-05	BPChr14G17387	3659.XP_004142061.1	2.7e-181	641.3	COG0197@1|root,KOG2160@2759|Eukaryota,37RVA@33090|Viridiplantae,3G8AT@35493|Streptophyta,4JFWM@91835|fabids	35493|Streptophyta	O	Hsp70 nucleotide exchange factor	-	GO:0003674,GO:0004857,GO:0005488,GO:0005515,GO:0008150,GO:0009893,GO:0009894,GO:0009896,GO:0010604,GO:0019222,GO:0019899,GO:0030162,GO:0030234,GO:0031323,GO:0031325,GO:0031329,GO:0031331,GO:0031396,GO:0031398,GO:0031399,GO:0031401,GO:0031625,GO:0032268,GO:0032270,GO:0032434,GO:0032436,GO:0042176,GO:0043086,GO:0044092,GO:0044389,GO:0045732,GO:0045862,GO:0048518,GO:0048522,GO:0050789,GO:0050790,GO:…	-	ko:K09562	ko04141,map04141	-	-	-	ko00000,ko00001,ko03110	-	-	-	Fes1
BPChr06G16513	-1.23918	0.000225925	0.00360394	BPChr06G16513	3641.EOY17531	0.0	2320.0	COG1132@1|root,KOG0054@2759|Eukaryota,37PYD@33090|Viridiplantae,3G8VE@35493|Streptophyta	35493|Streptophyta	Q	ABC transporter C family member	-	GO:0000325,GO:0003674,GO:0003824,GO:0005215,GO:0005575,GO:0005622,GO:0005623,GO:0005737,GO:0005773,GO:0005774,GO:0005911,GO:0006810,GO:0008150,GO:0009506,GO:0009605,GO:0009607,GO:0009624,GO:0015399,GO:0015405,GO:0016020,GO:0016462,GO:0016787,GO:0016817,GO:0016818,GO:0016887,GO:0017111,GO:0022804,GO:0022857,GO:0030054,GO:0031090,GO:0042623,GO:0042626,GO:0043207,GO:0043226,GO:0043227,GO:0043229,GO:…	-	ko:K05665,ko:K05666,ko:K05670	ko01523,ko01524,ko02010,ko04071,ko04976,ko04977,ko05206,map01523,map01524,map02010,map04071,map04976,map04977,map05206	-	-	-	ko00000,ko00001,ko02000	3.A.1.208,3.A.1.208.2,3.A.1.208.8	-	-	ABC_membrane,ABC_tran
[truncated: 739 more rows]
