# Supplementary material for: A R2R3-MYB Transcription Factor Gene, BpMYB123, Regulates BpLEA14 to Improve Drought Tolerance in Betula platyphylla
Source: Front Plant Sci. 2021 Dec 10;12:791390. doi: 10.3389/fpls.2021.791390 (PMC8702527; doi:10.3389/fpls.2021.791390)
Supplement: Supplementary file 6 [file Table_3.XLSX]

## Sheet: BpMYB123-GO-Enrichment
Class	GO_Name	GO_ID	GO_Level	P_value	EnrichmentScore	HitsGenesCountsInSelectedSet	HitsGenesCountsInBackground	AllGenesCountsInSelectedSet	AllGenesCountsInBackground	GenesOfSelectedSetInGOterm	corrected p-value(BH method)
Molecular function	inositol 3-alpha-galactosyltransferase activity	GO:0047216	8	2.71279e-06	11.4736	6	9	599	10309	BPChr05G13007,BPChr05G12992,BPChr08G22998,BPChr05G26467,BPChr05G26468,BPChr05G22475,	0.00206443
Molecular function	4,8,12-trimethyltrideca-1,3,7,11-tetraene synthase activity	GO:0097007	6	5.17795e-06	8.60518	7	14	599	10309	BPChr11G28651,BPChr11G28636,BPChr14G20652,BPunChr33412,BPChr06G08062,BPChr11G20484,BPChr06G08169,	0.00197021
Molecular function	(3E)-4,8-dimethyl-1,3,7-nonatriene synthase activity	GO:0097008	6	5.17795e-06	8.60518	7	14	599	10309	BPChr11G28651,BPChr11G28636,BPChr14G20652,BPunChr33412,BPChr06G08062,BPChr11G20484,BPChr06G08169,	0.00197021
Molecular function	transmembrane transporter activity	GO:0022857	3	9.30528e-06	1.59783	83	894	599	10309	BPChr03G11645,BPChr10G24049,BPChr03G00749,BPChr13G08972,BPChr01G16814,BPChr12G02773,BPChr12G02772,BPChr09G12131,BPChr01G10688,BPChr08G10764,BPChr13G17242,BPChr09G04737,BPChr05G26589,BPChr14G27745,BPChr01G10668,BPChr09G20604,BPChr07G18839,BPChr03G07585,BPChr13G21921,BPChr10G17578,BPChr11G26268,BPChr08G15365,BPChr10G04257,BPChr10G04254,BPChr06G19503,BPChr08G16209,BPChr12G06123,BPChr11G05742,BPChr08…	0.00177033
Molecular function	glycogenin glucosyltransferase activity	GO:0008466	8	0.000119528	6.88414	6	15	599	10309	BPChr05G13007,BPChr05G12992,BPChr08G22998,BPChr05G26467,BPChr05G26468,BPChr05G22475,	0.0181922
Molecular function	UDP-galactosyltransferase activity	GO:0035250	7	0.000122619	5.73678	7	21	599	10309	BPChr05G13007,BPChr05G12992,BPChr08G22998,BPChr14G09139,BPChr05G26467,BPChr05G26468,BPChr05G22475,	0.0155521
Molecular function	transporter activity	GO:0005215	2	0.00012912	1.47273	86	1005	599	10309	BPChr03G11645,BPChr10G24049,BPChr03G00749,BPChr13G08972,BPChr01G16814,BPChr12G02773,BPChr12G02772,BPChr09G12131,BPChr01G10688,BPChr08G10764,BPChr13G17242,BPChr09G04737,BPChr05G26589,BPChr14G27745,BPChr01G10668,BPChr09G20604,BPChr07G18839,BPChr03G15132,BPChr03G07585,BPChr13G21921,BPChr10G17578,BPChr11G26268,BPChr08G15365,BPChr10G04257,BPChr10G04254,BPChr06G19503,BPChr08G16209,BPChr12G06123,BPChr11…	0.0140371
Molecular function	galactosyltransferase activity	GO:0008378	6	0.000167101	3.91144	10	44	599	10309	BPChr05G13007,BPChr05G12992,BPChr08G22998,BPChr11G07247,BPChr14G09139,BPChr12G25764,BPChr05G26467,BPChr05G26468,BPChr11G26925,BPChr05G22475,	0.0141293
Molecular function	UDP-glucosyltransferase activity	GO:0035251	7	0.000452678	2.09669	24	197	599	10309	BPChr14G27744,BPChr07G07722,BPChr07G07731,BPChr01G22847,BPChr04G23842,BPChr10G21534,BPChr14G27046,BPChr14G27058,BPChr04G23866,BPChr10G21792,BPChr05G13007,BPChr05G12992,BPChr08G22998,BPChr03G04517,BPChr04G03580,BPChr11G18780,BPChr05G26467,BPChr05G26468,BPChr05G17555,BPChr11G05862,BPChr04G23740,BPChr12G22335,BPChr13G03828,BPChr05G22475,	0.0264991
Molecular function	carbon-carbon lyase activity	GO:0016830	4	0.000587792	3.15523	11	60	599	10309	BPChr06G02239,BPChr06G30969,BPChr09G25293,BPChr06G31257,BPChr14G09162,BPChr05G31662,BPChr09G25305,BPChr09G25307,BPChr06G30631,BPChr11G26326,BPChr05G19269,	0.0319507
Molecular function	anion transmembrane transporter activity	GO:0008509	6	0.000655009	1.56195	54	595	599	10309	BPChr03G11645,BPChr10G24049,BPChr03G00749,BPChr13G08972,BPChr01G16814,BPChr09G12131,BPChr08G10764,BPChr13G17242,BPChr09G04737,BPChr05G26589,BPChr09G20604,BPChr07G18839,BPChr03G07585,BPChr13G21921,BPChr08G15365,BPChr10G04257,BPChr10G04254,BPChr08G16209,BPChr08G01291,BPChr09G20572,BPChr12G28116,BPChr10G21775,BPChr14G04158,BPChr06G08456,BPChr09G20198,BPChr05G24306,BPChr11G09238,BPChr13G09015,BPChr11…	0.0332308
Molecular function	nucleic acid binding transcription factor activity	GO:0001071	2	0.000736238	1.38421	90	1119	599	10309	BPChr12G24115,BPChr10G06611,BPChr14G27906,BPChr03G11611,BPChr06G02213,BPChr13G17262,BPChr12G25898,BPChr12G25899,BPChr13G17251,BPChr09G01223,BPChr06G27318,BPChr10G28244,BPChr04G31973,BPChr06G30955,BPChr11G05795,BPChr05G15017,BPChr08G24163,BPChr04G27261,BPChr06G29517,BPChr05G31734,BPChr09G20109,BPunChr33213,BPChr12G28189,BPChr11G28637,BPunChr33688,BPChr05G07803,BPChr08G16994,BPChr11G05706,BPChr10G1…	0.0350173
Molecular function	transcription factor activity, sequence-specific DNA binding	GO:0003700	3	0.000736238	1.38421	90	1119	599	10309	BPChr12G24115,BPChr10G06611,BPChr14G27906,BPChr03G11611,BPChr06G02213,BPChr13G17262,BPChr12G25898,BPChr12G25899,BPChr13G17251,BPChr09G01223,BPChr06G27318,BPChr10G28244,BPChr04G31973,BPChr06G30955,BPChr11G05795,BPChr05G15017,BPChr08G24163,BPChr04G27261,BPChr06G29517,BPChr05G31734,BPChr09G20109,BPunChr33213,BPChr12G28189,BPChr11G28637,BPunChr33688,BPChr05G07803,BPChr08G16994,BPChr11G05706,BPChr10G1…	0.0350173
Molecular function	glucosyltransferase activity	GO:0046527	6	0.000776699	1.92813	27	241	599	10309	BPChr14G27744,BPChr07G07722,BPChr07G07731,BPChr01G22847,BPChr04G23842,BPChr10G21534,BPChr14G27046,BPChr14G27058,BPChr04G23866,BPChr10G21792,BPChr05G13007,BPChr02G10571,BPChr05G12992,BPChr08G22998,BPChr03G04517,BPChr05G21038,BPChr04G03580,BPChr11G18780,BPChr05G26467,BPChr05G26468,BPChr05G17555,BPChr11G05862,BPChr11G28737,BPChr04G23740,BPChr12G22335,BPChr13G03828,BPChr05G22475,	0.0311089
Molecular function	phosphate transmembrane transporter activity	GO:1901677	4	0.000788003	1.57299	51	558	599	10309	BPChr03G11645,BPChr10G24049,BPChr13G08972,BPChr01G16814,BPChr09G12131,BPChr08G10764,BPChr13G17242,BPChr09G04737,BPChr05G26589,BPChr09G20604,BPChr07G18839,BPChr03G07585,BPChr13G21921,BPChr08G15365,BPChr10G04257,BPChr10G04254,BPChr08G16209,BPChr08G01291,BPChr09G20572,BPChr12G28116,BPChr10G21775,BPChr14G04158,BPChr06G08456,BPChr09G20198,BPChr05G24306,BPChr11G09238,BPChr13G09015,BPChr10G04312,BPChr11…	0.0299835
Molecular function	uptake transmembrane transporter activity	GO:0015563	4	0.000788003	1.57299	51	558	599	10309	BPChr03G11645,BPChr10G24049,BPChr13G08972,BPChr01G16814,BPChr09G12131,BPChr08G10764,BPChr13G17242,BPChr09G04737,BPChr05G26589,BPChr09G20604,BPChr07G18839,BPChr03G07585,BPChr13G21921,BPChr08G15365,BPChr10G04257,BPChr10G04254,BPChr08G16209,BPChr08G01291,BPChr09G20572,BPChr12G28116,BPChr10G21775,BPChr14G04158,BPChr06G08456,BPChr09G20198,BPChr05G24306,BPChr11G09238,BPChr13G09015,BPChr10G04312,BPChr11…	0.0299835
Molecular function	inorganic anion transmembrane transporter activity	GO:0015103	7	0.000788003	1.57299	51	558	599	10309	BPChr03G11645,BPChr10G24049,BPChr13G08972,BPChr01G16814,BPChr09G12131,BPChr08G10764,BPChr13G17242,BPChr09G04737,BPChr05G26589,BPChr09G20604,BPChr07G18839,BPChr03G07585,BPChr13G21921,BPChr08G15365,BPChr10G04257,BPChr10G04254,BPChr08G16209,BPChr08G01291,BPChr09G20572,BPChr12G28116,BPChr10G21775,BPChr14G04158,BPChr06G08456,BPChr09G20198,BPChr05G24306,BPChr11G09238,BPChr13G09015,BPChr10G04312,BPChr11…	0.0299835
Molecular function	phosphate ion transmembrane transporter activity	GO:0015114	8	0.000788003	1.57299	51	558	599	10309	BPChr03G11645,BPChr10G24049,BPChr13G08972,BPChr01G16814,BPChr09G12131,BPChr08G10764,BPChr13G17242,BPChr09G04737,BPChr05G26589,BPChr09G20604,BPChr07G18839,BPChr03G07585,BPChr13G21921,BPChr08G15365,BPChr10G04257,BPChr10G04254,BPChr08G16209,BPChr08G01291,BPChr09G20572,BPChr12G28116,BPChr10G21775,BPChr14G04158,BPChr06G08456,BPChr09G20198,BPChr05G24306,BPChr11G09238,BPChr13G09015,BPChr10G04312,BPChr11…	0.0299835
Molecular function	inorganic solute uptake transmembrane transporter activity	GO:0015318	9	0.000788003	1.57299	51	558	599	10309	BPChr03G11645,BPChr10G24049,BPChr13G08972,BPChr01G16814,BPChr09G12131,BPChr08G10764,BPChr13G17242,BPChr09G04737,BPChr05G26589,BPChr09G20604,BPChr07G18839,BPChr03G07585,BPChr13G21921,BPChr08G15365,BPChr10G04257,BPChr10G04254,BPChr08G16209,BPChr08G01291,BPChr09G20572,BPChr12G28116,BPChr10G21775,BPChr14G04158,BPChr06G08456,BPChr09G20198,BPChr05G24306,BPChr11G09238,BPChr13G09015,BPChr10G04312,BPChr11…	0.0299835
Molecular function	ion transmembrane transporter activity	GO:0015075	5	0.000798142	1.54164	55	614	599	10309	BPChr03G11645,BPChr10G24049,BPChr03G00749,BPChr13G08972,BPChr01G16814,BPChr09G12131,BPChr08G10764,BPChr13G17242,BPChr09G04737,BPChr05G26589,BPChr09G20604,BPChr07G18839,BPChr03G07585,BPChr13G21921,BPChr08G15365,BPChr10G04257,BPChr10G04254,BPChr08G16209,BPChr08G01291,BPChr09G20572,BPChr12G28116,BPChr10G21775,BPChr14G04158,BPChr06G08456,BPChr09G20198,BPChr05G24306,BPChr11G09238,BPChr13G09015,BPChr11…	0.0242955
Molecular function	oxidoreductase activity, acting on paired donors, with incorporation or reduction of molecular oxygen, NAD(P)H as one donor, and incorporation of one atom of oxygen	GO:0016709	5	0.00126686	1.9208	25	224	599	10309	BPChr05G08770,BPChr09G29823,BPChr02G19941,BPChr06G30722,BPChr11G28651,BPChr05G08744,BPChr05G22399,BPChr11G28636,BPChr14G20652,BPChr04G18053,BPChr04G18051,BPChr04G18049,BPChr02G23497,BPunChr33412,BPChr06G08062,BPChr06G08095,BPChr11G20484,BPChr08G03096,BPChr06G02132,BPChr13G07716,BPChr04G16011,BPChr06G29453,BPChr06G31334,BPChr05G22440,BPChr06G08169,	0.03708
Molecular function	secondary active transmembrane transporter activity	GO:0015291	5	0.00155546	2.16634	18	143	599	10309	BPChr09G12131,BPChr05G26589,BPChr09G20604,BPChr13G21921,BPChr10G04257,BPChr10G04254,BPChr09G20572,BPChr14G04158,BPChr05G24306,BPChr10G04312,BPChr14G09178,BPChr08G13298,BPChr11G14345,BPChr03G10913,BPChr08G15786,BPChr06G09450,BPChr13G10339,BPChr14G12730,	0.0438409
Molecular function	transferase activity, transferring hexosyl groups	GO:0016758	5	0.00245353	1.6458	35	366	599	10309	BPChr14G27744,BPChr07G07722,BPChr07G07731,BPChr01G22847,BPChr04G23842,BPunChr33231,BPChr10G21534,BPChr14G27046,BPChr14G27058,BPChr04G23866,BPChr10G21792,BPChr05G13007,BPChr02G10571,BPChr05G12992,BPChr08G22998,BPChr03G04517,BPChr05G21038,BPChr11G07247,BPChr14G09139,BPChr12G25764,BPChr06G25448,BPChr04G03580,BPChr11G18780,BPChr05G26467,BPChr05G26468,BPChr11G14388,BPChr05G17555,BPChr11G05862,BPChr11G…	0.0666834
Molecular function	oxidoreductase activity, acting on paired donors, with incorporation or reduction of molecular oxygen	GO:0016705	4	0.00278064	1.70964	30	302	599	10309	BPChr05G08770,BPChr09G29823,BPChr09G12112,BPChr02G19941,BPChr06G30722,BPChr10G28244,BPChr11G28651,BPChr05G08744,BPChr05G22399,BPChr11G28636,BPChr14G20652,BPChr04G18053,BPChr04G18051,BPChr04G18049,BPChr02G23497,BPunChr33412,BPChr06G08062,BPChr06G08095,BPChr10G28308,BPChr11G20484,BPChr08G03096,BPChr06G02132,BPChr13G07716,BPChr04G16011,BPChr06G29453,BPChr06G31334,BPChr02G23513,BPChr05G22440,BPChr07G…	0.0729679
Molecular function	monooxygenase activity	GO:0004497	4	0.00280102	1.72699	29	289	599	10309	BPChr05G08770,BPChr09G29823,BPChr07G09987,BPChr02G19941,BPChr06G30722,BPChr09G04130,BPChr11G28651,BPChr05G08744,BPChr05G22399,BPChr11G28636,BPChr14G20652,BPChr04G18053,BPChr04G18051,BPChr04G18049,BPChr02G23497,BPunChr33412,BPChr06G21280,BPChr06G08062,BPChr06G08095,BPChr11G20484,BPChr08G03096,BPChr06G02132,BPChr13G07716,BPChr03G18535,BPChr04G16011,BPChr06G29453,BPChr06G31334,BPChr05G22440,BPChr06G…	0.0710525
Molecular function	nitrate transmembrane transporter activity	GO:0015112	8	0.0031788	3.97162	6	26	599	10309	BPChr10G04257,BPChr10G04254,BPChr08G01291,BPChr10G04312,BPChr11G26918,BPChr13G10339,	0.0780344
Molecular function	substrate-specific transmembrane transporter activity	GO:0022891	4	0.00402777	1.40352	61	748	599	10309	BPChr03G11645,BPChr10G24049,BPChr03G00749,BPChr13G08972,BPChr01G16814,BPChr09G12131,BPChr01G10688,BPChr08G10764,BPChr13G17242,BPChr09G04737,BPChr05G26589,BPChr14G27745,BPChr01G10668,BPChr09G20604,BPChr07G18839,BPChr03G07585,BPChr13G21921,BPChr08G15365,BPChr10G04257,BPChr10G04254,BPChr08G16209,BPChr08G01291,BPChr09G20572,BPChr12G28116,BPChr10G21775,BPChr14G04158,BPChr06G08456,BPChr09G20198,BPChr12…	0.0696621
Molecular function	UDP-glycosyltransferase activity	GO:0008194	5	0.00450058	1.72768	26	259	599	10309	BPChr14G27744,BPChr07G07722,BPChr07G07731,BPChr01G22847,BPChr04G23842,BPChr10G21534,BPChr14G27046,BPChr14G27058,BPChr04G23866,BPChr10G21792,BPChr05G13007,BPChr05G12992,BPChr08G22998,BPChr03G04517,BPChr14G09139,BPChr06G25448,BPChr04G03580,BPChr11G18780,BPChr05G26467,BPChr05G26468,BPChr05G17555,BPChr11G05862,BPChr04G23740,BPChr12G22335,BPChr13G03828,BPChr05G22475,	0.0761099
Molecular function	water transmembrane transporter activity	GO:0005372	5	0.00471218	3.68793	6	28	599	10309	BPChr10G24049,BPChr01G16814,BPChr08G15365,BPChr09G20962,BPChr09G20935,BPChr06G09478,	0.0779559
Molecular function	water channel activity	GO:0015250	7	0.00471218	3.68793	6	28	599	10309	BPChr10G24049,BPChr01G16814,BPChr08G15365,BPChr09G20962,BPChr09G20935,BPChr06G09478,	0.0779559
Molecular function	transferase activity, transferring glycosyl groups	GO:0016757	4	0.00496114	1.55313	37	410	599	10309	BPChr14G27744,BPChr07G07722,BPChr07G07731,BPChr01G22847,BPChr04G23842,BPunChr33231,BPChr10G21534,BPChr14G27046,BPChr14G27058,BPChr04G23866,BPChr10G21792,BPChr05G13007,BPChr02G10571,BPChr05G12992,BPChr08G22998,BPChr03G04517,BPChr05G21038,BPChr11G07247,BPChr14G09139,BPChr12G25764,BPChr06G25448,BPChr04G03580,BPChr11G18780,BPChr05G26467,BPChr05G26468,BPChr11G14388,BPChr05G17555,BPChr11G05862,BPChr11G…	0.0786547
Molecular function	carbohydrate binding	GO:0030246	3	0.00651817	2.17218	13	103	599	10309	BPChr06G11164,BPunChr33231,BPChr06G26097,BPChr08G22998,BPChr11G01745,BPChr06G26101,BPChr05G08806,BPChr05G26468,BPChr14G27877,BPChr11G28751,BPunChr32643,BPChr11G26926,BPChr05G22475,	0.0953909
Molecular function	monovalent inorganic cation transmembrane transporter activity	GO:0015077	8	0.00660164	1.93759	17	151	599	10309	BPChr13G08972,BPChr09G04737,BPChr05G26589,BPChr09G20604,BPChr13G21921,BPChr09G20572,BPChr10G21775,BPChr05G24306,BPChr14G09178,BPChr11G14345,BPChr11G05885,BPChr13G10374,BPChr08G15786,BPChr06G09433,BPChr07G24804,BPChr06G09450,BPChr13G10339,	0.0947896
Molecular function	drug transporter activity	GO:0090484	3	0.00765103	2.13081	13	105	599	10309	BPChr12G02773,BPChr12G02772,BPChr13G17242,BPChr12G02801,BPChr11G09238,BPChr01G23690,BPChr04G27143,BPChr06G19428,BPChr02G23375,BPChr06G19479,BPChr12G02759,BPunChr32670,BPunChr32674,	0.107823
Molecular function	drug transmembrane transporter activity	GO:0015238	4	0.00765103	2.13081	13	105	599	10309	BPChr12G02773,BPChr12G02772,BPChr13G17242,BPChr12G02801,BPChr11G09238,BPChr01G23690,BPChr04G27143,BPChr06G19428,BPChr02G23375,BPChr06G19479,BPChr12G02759,BPunChr32670,BPunChr32674,	0.107823
Molecular function	hydrolase activity, hydrolyzing O-glycosyl compounds	GO:0004553	5	0.00886548	1.69888	23	233	599	10309	BPChr06G11164,BPChr01G22861,BPChr09G17892,BPChr05G21087,BPChr11G05719,BPChr11G05733,BPChr09G06477,BPChr12G26832,BPunChr33603,BPunChr33600,BPChr11G01745,BPChr08G15819,BPChr10G15228,BPChr05G08806,BPChr01G22760,BPChr14G27877,BPChr07G14144,BPChr13G02543,BPChr14G12724,BPChr06G19239,BPunChr32643,BPChr14G12703,BPChr12G11478,	0.112444
Molecular function	polysaccharide binding	GO:0030247	4	0.0092223	2.35758	10	73	599	10309	BPChr06G11164,BPunChr33231,BPChr06G26097,BPChr11G01745,BPChr06G26101,BPChr05G08806,BPChr14G27877,BPChr11G28751,BPunChr32643,BPChr11G26926,	0.115052
Molecular function	pattern binding	GO:0001871	3	0.0092223	2.35758	10	73	599	10309	BPChr06G11164,BPunChr33231,BPChr06G26097,BPChr11G01745,BPChr06G26101,BPChr05G08806,BPChr14G27877,BPChr11G28751,BPunChr32643,BPChr11G26926,	0.115052
Molecular function	potassium ion transmembrane transporter activity	GO:0015079	9	0.0101266	2.32572	10	74	599	10309	BPChr09G04737,BPChr05G26589,BPChr13G21921,BPChr10G21775,BPChr05G24306,BPChr11G05885,BPChr13G10374,BPChr06G09433,BPChr07G24804,BPChr13G10339,	0.107032
Molecular function	carboxy-lyase activity	GO:0016831	5	0.0164507	2.86839	6	36	599	10309	BPChr09G25293,BPChr14G09162,BPChr09G25305,BPChr09G25307,BPChr06G30631,BPChr05G19269,	0.162584
Molecular function	substrate-specific transporter activity	GO:0022892	3	0.0208094	1.29182	62	826	599	10309	BPChr03G11645,BPChr10G24049,BPChr03G00749,BPChr13G08972,BPChr01G16814,BPChr09G12131,BPChr01G10688,BPChr08G10764,BPChr13G17242,BPChr09G04737,BPChr05G26589,BPChr14G27745,BPChr01G10668,BPChr09G20604,BPChr07G18839,BPChr03G07585,BPChr13G21921,BPChr08G15365,BPChr10G04257,BPChr10G04254,BPChr08G16209,BPChr05G21075,BPChr08G01291,BPChr09G20572,BPChr12G28116,BPChr10G21775,BPChr14G04158,BPChr06G08456,BPChr09…	0.17213
Molecular function	chitin binding	GO:0008061	4	0.0242449	2.9673	5	29	599	10309	BPChr06G02222,BPChr01G31956,BPChr01G31966,BPChr05G31605,BPChr09G04000,	0.194214
Molecular function	unfolded protein binding	GO:0051082	4	0.0266833	2.58155	6	40	599	10309	BPChr10G03308,BPChr12G29238,BPChr10G15222,BPChr10G15245,BPChr07G24808,BPChr14G12945,	0.205111
Molecular function	hydrolase activity, acting on glycosyl bonds	GO:0016798	4	0.0312723	1.51083	23	262	599	10309	BPChr06G11164,BPChr01G22861,BPChr09G17892,BPChr05G21087,BPChr11G05719,BPChr11G05733,BPChr09G06477,BPChr12G26832,BPunChr33603,BPunChr33600,BPChr11G01745,BPChr08G15819,BPChr10G15228,BPChr05G08806,BPChr01G22760,BPChr14G27877,BPChr07G14144,BPChr13G02543,BPChr14G12724,BPChr06G19239,BPunChr32643,BPChr14G12703,BPChr12G11478,	0.222413
Molecular function	phosphoric ester hydrolase activity	GO:0042578	5	0.0324752	1.50509	23	263	599	10309	BPChr11G07163,BPChr08G24778,BPChr08G24774,BPChr07G07722,BPChr07G07731,BPChr14G27046,BPChr14G27058,BPChr06G26097,BPChr04G03643,BPChr02G18989,BPChr06G08093,BPChr01G24983,BPChr07G22610,BPChr06G13478,BPChr06G26101,BPChr10G28357,BPChr13G10393,BPChr08G03113,BPunChr33349,BPChr06G31350,BPChr14G28037,BPChr11G26926,BPChr01G13579,	0.22883
Molecular function	protein binding involved in protein folding	GO:0044183	4	0.0356762	2.68912	5	32	599	10309	BPChr10G03308,BPChr10G15222,BPChr10G15245,BPChr07G24808,BPChr07G32007,	0.249079
Molecular function	active transmembrane transporter activity	GO:0022804	4	0.0409256	1.42104	27	327	599	10309	BPChr13G08972,BPChr09G12131,BPChr05G26589,BPChr09G20604,BPChr13G21921,BPChr10G17578,BPChr10G04257,BPChr10G04254,BPChr06G19503,BPChr09G20572,BPChr14G04158,BPChr08G15405,BPChr05G24306,BPChr10G04312,BPChr14G09178,BPChr03G02606,BPChr06G16513,BPChr09G04020,BPChr06G11092,BPChr08G13298,BPChr11G14345,BPChr03G10913,BPChr08G15786,BPChr13G10326,BPChr06G09450,BPChr13G10339,BPChr14G12730,	0.28058
Molecular function	efflux transmembrane transporter activity	GO:0015562	4	0.044869	2.53093	5	34	599	10309	BPChr10G04257,BPChr10G04254,BPChr10G04312,BPChr06G19428,BPChr06G19479,	0.289367
Molecular function	phosphatase activity	GO:0016791	6	0.0479546	1.49007	20	231	599	10309	BPChr11G07163,BPChr08G24778,BPChr08G24774,BPChr07G07722,BPChr07G07731,BPChr14G27046,BPChr14G27058,BPChr06G26097,BPChr04G03643,BPChr02G18989,BPChr06G08093,BPChr06G26101,BPChr10G28357,BPChr13G10393,BPChr08G03113,BPunChr33349,BPChr06G31350,BPChr14G28037,BPChr11G26926,BPChr01G13579,	0.306667
Cellular component	integral component of plasma membrane	GO:0005887	5	0.00252214	1.83176	25	252	642	11854	BPChr10G24049,BPChr03G00749,BPChr01G16814,BPChr09G12131,BPChr01G10688,BPChr08G10764,BPChr09G04737,BPChr01G10668,BPChr03G07585,BPChr08G15365,BPChr11G05742,BPChr06G08456,BPChr12G08357,BPChr09G20962,BPChr03G18528,BPChr09G20935,BPChr11G05695,BPChr08G13298,BPChr11G14345,BPChr06G19428,BPChr03G10913,BPChr08G15786,BPChr06G09433,BPChr06G19479,BPChr06G09478,	0.95337
Cellular component	intrinsic component of plasma membrane	GO:0031226	4	0.00557149	1.59091	33	383	642	11854	BPChr10G24049,BPChr03G00749,BPChr01G16814,BPChr09G12131,BPChr06G11164,BPChr01G10688,BPChr08G10764,BPChr09G04737,BPChr04G27230,BPChr01G10668,BPChr03G07585,BPChr08G31905,BPChr08G15365,BPChr11G05742,BPChr06G08456,BPChr12G08357,BPChr14G12338,BPChr05G08806,BPChr09G04000,BPChr09G20962,BPChr14G27877,BPChr03G18528,BPChr09G20935,BPChr11G05695,BPChr08G13298,BPChr11G14345,BPChr06G19428,BPChr03G10913,BPChr08…	0.351004
Cellular component	chloroplast stroma	GO:0009570	7	0.00824216	1.41163	50	654	642	11854	BPChr10G03308,BPChr10G21601,BPChr08G05131,BPChr06G30700,BPChr13G23043,BPChr06G30522,BPChr05G31516,BPChr11G17783,BPChr06G30757,BPChr04G27196,BPChr11G17734,BPChr06G30544,BPChr08G15422,BPChr02G18040,BPChr06G31438,BPChr06G26097,BPChr05G22199,BPChr02G23495,BPChr04G09389,BPChr05G24311,BPChr08G20378,BPChr10G04329,BPChr10G04339,BPChr10G15222,BPChr09G25312,BPChr01G12500,BPChr08G25542,BPChr06G26101,BPChr08…	0.445077
Cellular component	plastid stroma	GO:0009532	6	0.0102721	1.39458	50	662	642	11854	BPChr10G03308,BPChr10G21601,BPChr08G05131,BPChr06G30700,BPChr13G23043,BPChr06G30522,BPChr05G31516,BPChr11G17783,BPChr06G30757,BPChr04G27196,BPChr11G17734,BPChr06G30544,BPChr08G15422,BPChr02G18040,BPChr06G31438,BPChr06G26097,BPChr05G22199,BPChr02G23495,BPChr04G09389,BPChr05G24311,BPChr08G20378,BPChr10G04329,BPChr10G04339,BPChr10G15222,BPChr09G25312,BPChr01G12500,BPChr08G25542,BPChr06G26101,BPChr08…	0.485358
Cellular component	plastid	GO:0009536	6	0.0195097	1.18753	124	1928	642	11854	BPChr11G07389,BPChr03G11611,BPChr05G31773,BPChr04G21907,BPChr10G03308,BPChr08G10764,BPChr01G19034,BPChr05G07841,BPChr04G27246,BPChr02G11843,BPChr10G21601,BPChr08G05131,BPChr06G30700,BPChr14G27745,BPChr13G23043,BPChr09G04105,BPChr14G05533,BPChr06G30522,BPChr07G07727,BPChr05G31516,BPChr11G17779,BPChr08G24163,BPChr11G17783,BPChr11G17789,BPChr06G30757,BPChr06G30992,BPChr14G05457,BPChr11G10095,BPChr04…	0.460917
Cellular component	mediator complex	GO:0016592	7	0.0212354	2.48556	7	52	642	11854	BPChr05G07468,BPChr06G30944,BPChr06G30355,BPChr06G31068,BPChr14G02734,BPChr12G29137,BPChr06G30255,	0.472175
Cellular component	thylakoid lumen	GO:0031977	5	0.0215673	2.30802	8	64	642	11854	BPChr03G28938,BPChr03G28912,BPChr08G16129,BPChr12G08411,BPChr09G20207,BPChr06G30437,BPChr03G28856,BPChr01G16864,	0.452914
Cellular component	integral component of membrane	GO:0016021	4	0.0334774	1.32992	43	597	642	11854	BPChr10G24049,BPChr05G31550,BPChr01G20286,BPChr03G00749,BPChr01G16814,BPChr09G12131,BPChr01G10688,BPChr08G10764,BPChr09G04737,BPChr01G10668,BPChr03G07585,BPChr09G17892,BPChr10G17578,BPChr08G15365,BPChr06G19503,BPChr11G05742,BPChr14G04158,BPChr08G15405,BPChr06G08456,BPChr01G31932,BPChr12G08357,BPChr11G07078,BPChr11G01725,BPChr03G02606,BPChr13G07711,BPChr09G20962,BPChr06G11092,BPChr03G18528,BPChr09…	0.575202
Cellular component	chloroplast	GO:0009507	7	0.0339405	1.1695	118	1863	642	11854	BPChr11G07389,BPChr03G11611,BPChr05G31773,BPChr04G21907,BPChr10G03308,BPChr08G10764,BPChr01G19034,BPChr05G07841,BPChr04G27246,BPChr02G11843,BPChr10G21601,BPChr08G05131,BPChr06G30700,BPChr13G23043,BPChr09G04105,BPChr14G05533,BPChr06G30522,BPChr07G07727,BPChr05G31516,BPChr11G17779,BPChr08G24163,BPChr11G17783,BPChr11G17789,BPChr06G30757,BPChr06G30992,BPChr14G05457,BPChr11G10095,BPChr04G27196,BPChr14…	0.557806
Cellular component	plastid part	GO:0044435	5	0.034946	1.23094	73	1095	642	11854	BPChr11G07389,BPChr10G03308,BPChr04G27246,BPChr10G21601,BPChr08G05131,BPChr06G30700,BPChr14G27745,BPChr13G23043,BPChr06G30522,BPChr07G07727,BPChr05G31516,BPChr11G17783,BPChr06G30757,BPChr04G27196,BPChr14G27016,BPChr11G17734,BPChr06G30544,BPChr08G15422,BPChr02G18040,BPChr06G31438,BPChr06G26097,BPChr05G22199,BPChr05G24755,BPChr02G23495,BPChr03G28938,BPChr04G09389,BPChr12G26832,BPChr05G24311,BPChr01…	0.5504
Biological process	response to abiotic stimulus	GO:0009628	3	1.60283e-12	1.60658	189	2070	683	12018	BPChr12G24115,BPChr01G26609,BPChr02G13174,BPChr14G27906,BPChr05G17471,BPChr02G13192,BPChr03G11611,BPChr03G07597,BPChr08G24774,BPChr07G09987,BPChr12G25898,BPChr08G10768,BPChr12G25899,BPChr09G12112,BPChr09G01223,BPChr06G04881,BPChr13G07696,BPChr01G19034,BPChr06G27318,BPChr09G04143,BPChr08G05143,BPChr04G27246,BPChr02G11843,BPChr11G14070,BPChr06G29502,BPChr10G21601,BPChr11G26281,BPChr14G02007,BPChr14…	4.31321e-09
Biological process	starch catabolic process	GO:0005983	9	5.51777e-10	8.4721	13	27	683	12018	BPunChr33231,BPChr08G15422,BPChr06G26097,BPChr12G26832,BPunChr33603,BPunChr33600,BPChr08G20378,BPChr08G25542,BPChr06G26101,BPChr07G14144,BPChr11G28751,BPChr11G26926,BPChr12G11478,	7.42416e-07
Biological process	cellular polysaccharide catabolic process	GO:0044247	7	9.3013e-10	6.39851	16	44	683	12018	BPunChr33231,BPChr08G15422,BPChr06G26097,BPChr12G26832,BPunChr33603,BPunChr33600,BPChr11G01745,BPChr08G20378,BPChr08G25542,BPChr06G26101,BPChr01G22760,BPChr11G14388,BPChr07G14144,BPChr11G28751,BPChr11G26926,BPChr12G11478,	8.34327e-07
Biological process	glucan catabolic process	GO:0009251	7	1.36809e-09	6.25632	16	45	683	12018	BPunChr33231,BPChr08G15422,BPChr06G26097,BPChr12G26832,BPunChr33603,BPunChr33600,BPChr11G01745,BPChr08G20378,BPChr08G25542,BPChr06G26101,BPChr11G14388,BPChr07G14144,BPChr13G02543,BPChr11G28751,BPChr11G26926,BPChr12G11478,	9.20381e-07
Biological process	response to inorganic substance	GO:0010035	4	1.53874e-09	1.77955	107	1058	683	12018	BPChr03G00749,BPChr14G27906,BPChr03G07597,BPChr08G24774,BPChr12G25899,BPChr13G17242,BPChr09G01223,BPChr13G07696,BPChr06G30722,BPChr08G05143,BPChr02G11843,BPChr06G29502,BPChr10G21601,BPChr08G05123,BPChr11G05795,BPChr11G28651,BPChr05G31516,BPChr13G21921,BPChr08G24163,BPChr06G08613,BPChr06G29517,BPChr11G14279,BPChr06G19503,BPChr06G30757,BPChr09G20109,BPChr08G01288,BPChr02G00330,BPChr11G28636,BPChr06…	8.28152e-07
Biological process	response to heat	GO:0009408	5	3.72653e-09	2.90647	37	224	683	12018	BPChr05G17471,BPChr03G07597,BPChr08G05143,BPChr06G29502,BPChr10G21601,BPChr11G26281,BPChr02G18017,BPChr05G31516,BPChr06G31416,BPChr06G29324,BPChr01G31952,BPChr07G15623,BPChr12G06146,BPChr12G29238,BPChr03G15693,BPChr05G13007,BPChr04G09389,BPChr05G12992,BPChr03G13873,BPunChr32788,BPChr14G01996,BPChr11G09253,BPChr11G09263,BPChr10G04329,BPChr10G04339,BPChr14G09145,BPChr02G21999,BPChr05G26467,BPChr10G…	1.67135e-06
Biological process	response to drug	GO:0042493	4	6.54681e-09	1.94145	79	716	683	12018	BPChr10G24049,BPChr14G27906,BPChr12G02773,BPChr12G02772,BPChr03G07597,BPChr13G17242,BPChr09G01223,BPChr06G02222,BPChr06G27318,BPChr06G30722,BPChr08G05143,BPChr06G29502,BPChr08G27623,BPChr11G32507,BPChr08G16243,BPChr11G05795,BPChr08G24163,BPChr07G18868,BPChr06G29517,BPChr06G19503,BPChr06G29324,BPChr01G31956,BPChr12G02801,BPChr01G31966,BPChr08G16723,BPChr03G15693,BPChr05G13007,BPChr06G31011,BPChr04…	2.51678e-06
Biological process	response to chemical	GO:0042221	3	1.05713e-08	1.36525	242	3119	683	12018	BPChr12G24115,BPChr10G24049,BPChr03G00749,BPChr14G27906,BPChr12G02773,BPChr12G02772,BPChr03G11611,BPChr03G07597,BPChr08G24774,BPChr12G25899,BPChr09G12112,BPChr13G17242,BPChr09G01223,BPChr06G02222,BPChr09G04737,BPChr13G07696,BPChr07G18809,BPChr06G27318,BPChr06G30722,BPChr08G05143,BPChr04G27246,BPChr02G11843,BPChr03G18211,BPChr06G29502,BPChr10G21601,BPChr08G27623,BPChr14G26659,BPChr14G27744,BPChr11…	3.55591e-06
Biological process	response to hydrogen peroxide	GO:0042542	6	1.36709e-08	3.8914	23	104	683	12018	BPChr03G07597,BPChr08G05143,BPChr06G29502,BPChr11G05795,BPChr08G24163,BPChr06G29324,BPChr03G15693,BPChr05G13007,BPChr06G31011,BPChr04G09389,BPChr05G12992,BPChr01G16942,BPChr14G01996,BPChr11G09253,BPChr11G09263,BPChr05G26467,BPChr08G26672,BPChr10G28323,BPChr06G30651,BPChr03G15061,BPChr09G08313,BPChr06G19486,BPChr13G03828,	4.08761e-06
Biological process	polysaccharide catabolic process	GO:0000272	6	1.59893e-08	4.79888	18	66	683	12018	BPunChr33231,BPChr08G15422,BPChr06G26097,BPChr09G06477,BPChr12G26832,BPunChr33603,BPunChr33600,BPChr11G01745,BPChr08G20378,BPChr08G25542,BPChr06G26101,BPChr01G22760,BPChr11G14388,BPChr07G14144,BPChr13G02543,BPChr11G28751,BPChr11G26926,BPChr12G11478,	4.30273e-06
Biological process	response to high light intensity	GO:0009644	7	2.11137e-08	3.9501	22	98	683	12018	BPChr03G07597,BPChr09G01223,BPChr08G05143,BPChr06G29502,BPChr11G14274,BPChr06G29324,BPunChr33688,BPChr03G15693,BPChr05G13007,BPChr04G09389,BPChr05G12992,BPChr14G01996,BPChr11G09253,BPChr11G09263,BPChr03G09666,BPChr05G26467,BPChr10G28323,BPChr03G15061,BPChr11G05883,BPChr03G15105,BPChr06G19486,BPChr06G29277,	5.16519e-06
Biological process	response to light stimulus	GO:0009416	5	3.00178e-08	1.88528	78	728	683	12018	BPChr12G24115,BPChr01G26609,BPChr02G13174,BPChr02G13192,BPChr03G07597,BPChr07G09987,BPChr12G25898,BPChr08G10768,BPChr09G12112,BPChr09G01223,BPChr06G04881,BPChr06G27318,BPChr09G04143,BPChr08G05143,BPChr04G27246,BPChr11G14070,BPChr06G29502,BPChr14G02007,BPChr14G27744,BPChr13G23043,BPChr14G05533,BPChr11G14274,BPChr14G05457,BPChr08G28436,BPChr14G05470,BPChr08G01288,BPChr12G28189,BPChr06G29324,BPChr11…	6.73148e-06
Biological process	cellular carbohydrate catabolic process	GO:0044275	6	4.89344e-08	5.0274	16	56	683	12018	BPunChr33231,BPChr08G15422,BPChr06G26097,BPChr12G26832,BPunChr33603,BPunChr33600,BPChr11G01745,BPChr08G20378,BPChr08G25542,BPChr06G26101,BPChr01G22760,BPChr11G14388,BPChr07G14144,BPChr11G28751,BPChr11G26926,BPChr12G11478,	1.01294e-05
Biological process	response to radiation	GO:0009314	4	5.64348e-08	1.83196	81	778	683	12018	BPChr12G24115,BPChr01G26609,BPChr02G13174,BPChr02G13192,BPChr03G07597,BPChr07G09987,BPChr12G25898,BPChr08G10768,BPChr09G12112,BPChr09G01223,BPChr06G04881,BPChr06G27318,BPChr09G04143,BPChr08G05143,BPChr04G27246,BPChr11G14070,BPChr06G29502,BPChr14G02007,BPChr14G27744,BPChr13G23043,BPChr08G10702,BPChr14G05533,BPChr11G14274,BPChr14G05457,BPChr08G28436,BPChr14G05470,BPChr08G01288,BPChr12G28189,BPChr06…	1.08476e-05
Biological process	glucan metabolic process	GO:0044042	6	7.97218e-08	3.16726	27	150	683	12018	BPunChr33231,BPChr08G15422,BPChr06G26097,BPChr05G13007,BPChr02G10571,BPChr12G26832,BPChr05G12992,BPunChr33603,BPunChr33600,BPChr08G22998,BPChr11G01745,BPChr08G20378,BPChr11G07247,BPChr06G25448,BPChr08G25542,BPChr06G26101,BPChr05G26467,BPChr05G26468,BPChr11G14388,BPChr02G10607,BPChr07G14144,BPChr11G28737,BPChr13G02543,BPChr11G28751,BPChr11G26926,BPChr12G11478,BPChr05G22475,	1.43021e-05
Biological process	cellular glucan metabolic process	GO:0006073	7	1.12451e-07	3.19925	26	143	683	12018	BPunChr33231,BPChr08G15422,BPChr06G26097,BPChr05G13007,BPChr02G10571,BPChr12G26832,BPChr05G12992,BPunChr33603,BPunChr33600,BPChr08G22998,BPChr11G01745,BPChr08G20378,BPChr11G07247,BPChr06G25448,BPChr08G25542,BPChr06G26101,BPChr05G26467,BPChr05G26468,BPChr11G14388,BPChr02G10607,BPChr07G14144,BPChr11G28737,BPChr11G28751,BPChr11G26926,BPChr12G11478,BPChr05G22475,	1.89129e-05
Biological process	glycogen metabolic process	GO:0005977	8	1.21191e-07	6.39851	12	33	683	12018	BPunChr33231,BPChr05G13007,BPChr12G26832,BPChr05G12992,BPChr08G22998,BPChr05G26467,BPChr05G26468,BPChr11G14388,BPChr11G28751,BPChr11G26926,BPChr12G11478,BPChr05G22475,	1.91838e-05
Biological process	energy reserve metabolic process	GO:0006112	6	1.21191e-07	6.39851	12	33	683	12018	BPunChr33231,BPChr05G13007,BPChr12G26832,BPChr05G12992,BPChr08G22998,BPChr05G26467,BPChr05G26468,BPChr11G14388,BPChr11G28751,BPChr11G26926,BPChr12G11478,BPChr05G22475,	1.91838e-05
Biological process	response to temperature stimulus	GO:0009266	4	1.26518e-07	1.94202	66	598	683	12018	BPChr14G27906,BPChr05G17471,BPChr03G07597,BPChr12G25898,BPChr08G10768,BPChr12G25899,BPChr09G01223,BPChr01G19034,BPChr08G05143,BPChr06G29502,BPChr10G21601,BPChr11G26281,BPChr13G23043,BPChr02G18017,BPChr10G21801,BPChr05G31516,BPChr11G14279,BPChr06G31416,BPChr06G29324,BPChr05G21062,BPChr01G31952,BPChr07G15623,BPChr12G06146,BPChr06G31438,BPChr12G29238,BPChr08G16723,BPChr05G22199,BPChr03G15693,BPChr05…	1.7919e-05
Biological process	response to oxygen-containing compound	GO:1901700	4	3.27709e-07	1.45092	157	1904	683	12018	BPChr10G24049,BPChr14G27906,BPChr03G11611,BPChr03G07597,BPChr08G24774,BPChr12G25899,BPChr09G12112,BPChr13G17242,BPChr09G01223,BPChr06G02222,BPChr09G04737,BPChr13G07696,BPChr07G18809,BPChr06G27318,BPChr06G30722,BPChr08G05143,BPChr03G18211,BPChr06G29502,BPChr08G27623,BPChr11G32507,BPChr14G25321,BPChr13G23043,BPChr07G26442,BPChr07G18839,BPChr08G16243,BPChr11G05795,BPChr07G07722,BPChr13G21921,BPChr05…	4.40933e-05
Biological process	response to stimulus	GO:0050896	2	4.16199e-07	1.20044	377	5526	683	12018	BPChr12G24115,BPChr10G24049,BPChr01G26609,BPChr02G13174,BPChr01G20286,BPChr03G00749,BPChr14G27906,BPChr05G17471,BPChr02G13192,BPChr12G02773,BPChr12G02772,BPChr03G11611,BPChr03G07597,BPChr08G24774,BPChr09G12131,BPChr05G22418,BPChr07G09987,BPChr12G25898,BPChr08G10768,BPChr12G25899,BPChr06G02200,BPChr11G07342,BPChr13G17259,BPChr06G04895,BPChr09G12112,BPChr06G02239,BPChr13G17242,BPChr09G01223,BPChr06…	5.33329e-05
Biological process	response to reactive oxygen species	GO:0000302	5	1.8295e-06	2.3596	35	261	683	12018	BPChr03G07597,BPChr13G17242,BPChr06G30722,BPChr08G05143,BPChr06G29502,BPChr11G05795,BPChr08G24163,BPChr11G14279,BPChr06G19503,BPChr06G30757,BPChr06G29324,BPChr03G15693,BPChr05G13007,BPChr06G31011,BPChr04G09389,BPChr05G12992,BPChr01G16942,BPChr14G01996,BPChr11G09253,BPChr11G09263,BPChr10G04329,BPChr10G04339,BPChr03G09666,BPChr05G26467,BPChr08G26672,BPChr08G16129,BPChr10G28323,BPChr06G30651,BPChr03…	0.000223781
Biological process	response to antibiotic	GO:0046677	4	2.32306e-06	2.09816	44	369	683	12018	BPChr03G07597,BPChr06G02222,BPChr08G05143,BPChr06G29502,BPChr11G05795,BPChr08G24163,BPChr07G18868,BPChr06G29517,BPChr06G19503,BPChr06G29324,BPChr08G16723,BPChr03G15693,BPChr05G13007,BPChr06G31011,BPChr04G09389,BPChr05G12992,BPChr01G16942,BPChr14G01996,BPChr11G09253,BPChr11G09263,BPChr08G17078,BPChr03G10890,BPChr14G02754,BPChr02G20802,BPChr06G02126,BPChr05G26467,BPChr08G26672,BPChr03G29004,BPChr08…	0.000271798
Biological process	cellular carbohydrate metabolic process	GO:0044262	5	2.63202e-06	2.26058	37	288	683	12018	BPChr11G07163,BPChr07G09995,BPChr05G07841,BPChr07G07722,BPChr07G07731,BPunChr33231,BPChr08G15422,BPChr14G27046,BPChr14G27058,BPChr06G26097,BPChr05G13007,BPChr02G10571,BPChr12G26814,BPChr13G24605,BPChr12G26832,BPChr05G12992,BPunChr33603,BPunChr33600,BPChr08G22998,BPChr11G01745,BPChr08G20378,BPChr11G07247,BPChr06G25448,BPChr08G25542,BPChr06G26101,BPChr05G26467,BPChr05G26468,BPChr01G22760,BPChr11G14…	0.000295115
Biological process	circadian rhythm	GO:0007623	3	2.82145e-06	3.0243	22	128	683	12018	BPChr12G25898,BPChr10G28244,BPChr11G14279,BPChr05G04729,BPChr08G28436,BPunChr33213,BPChr11G28637,BPChr06G30794,BPChr06G29383,BPChr11G01787,BPChr11G03746,BPChr10G28308,BPChr03G09666,BPChr14G02754,BPChr11G07236,BPChr11G18733,BPChr08G27552,BPChr11G06951,BPChr08G28562,BPChr11G14351,BPChr11G06915,BPChr08G01309,	0.000303701
Biological process	cellular polysaccharide metabolic process	GO:0044264	6	2.83881e-06	2.6068	28	189	683	12018	BPunChr33231,BPChr08G15422,BPChr06G26097,BPChr05G13007,BPChr02G10571,BPChr13G24605,BPChr12G26832,BPChr05G12992,BPunChr33603,BPunChr33600,BPChr08G22998,BPChr11G01745,BPChr08G20378,BPChr11G07247,BPChr06G25448,BPChr08G25542,BPChr06G26101,BPChr05G26467,BPChr05G26468,BPChr01G22760,BPChr11G14388,BPChr02G10607,BPChr07G14144,BPChr11G28737,BPChr11G28751,BPChr11G26926,BPChr12G11478,BPChr05G22475,	0.000293817
Biological process	energy derivation by oxidation of organic compounds	GO:0015980	5	3.38236e-06	3.31012	19	101	683	12018	BPChr05G31782,BPChr13G08971,BPChr13G08901,BPunChr33231,BPChr09G04044,BPChr05G13007,BPChr06G31011,BPChr12G26832,BPChr05G12992,BPChr08G22998,BPChr05G26467,BPChr05G26468,BPChr06G30651,BPChr11G14388,BPChr11G28751,BPChr11G17821,BPChr11G26926,BPChr12G11478,BPChr05G22475,	0.000337108
Biological process	rhythmic process	GO:0048511	2	4.18744e-06	2.95504	22	131	683	12018	BPChr12G25898,BPChr10G28244,BPChr11G14279,BPChr05G04729,BPChr08G28436,BPunChr33213,BPChr11G28637,BPChr06G30794,BPChr06G29383,BPChr11G01787,BPChr11G03746,BPChr10G28308,BPChr03G09666,BPChr14G02754,BPChr11G07236,BPChr11G18733,BPChr08G27552,BPChr11G06951,BPChr08G28562,BPChr11G14351,BPChr11G06915,BPChr08G01309,	0.000402443
Biological process	starch metabolic process	GO:0005982	8	4.65621e-06	4.39898	13	52	683	12018	BPunChr33231,BPChr08G15422,BPChr06G26097,BPChr12G26832,BPunChr33603,BPunChr33600,BPChr08G20378,BPChr08G25542,BPChr06G26101,BPChr07G14144,BPChr11G28751,BPChr11G26926,BPChr12G11478,	0.000432064
Biological process	response to nematode	GO:0009624	6	7.45214e-06	3.26522	18	97	683	12018	BPChr12G02773,BPChr12G02772,BPChr03G15132,BPChr13G21921,BPChr10G04257,BPChr10G04254,BPChr05G21087,BPChr12G02801,BPChr13G09015,BPChr10G04312,BPChr14G09178,BPChr06G16513,BPChr09G04020,BPChr11G09183,BPChr12G02759,BPChr05G21166,BPunChr32670,BPunChr32674,	0.000668457
Biological process	response to osmotic stress	GO:0006970	4	1.32901e-05	1.70034	66	683	683	12018	BPChr14G27906,BPChr08G24774,BPChr08G10768,BPChr09G01223,BPChr13G07696,BPChr02G11843,BPChr07G26442,BPChr14G05533,BPChr11G05795,BPChr10G21801,BPChr05G15017,BPChr06G29517,BPChr10G04257,BPChr11G14279,BPChr10G04254,BPChr14G05457,BPChr11G15545,BPChr09G20109,BPChr14G05470,BPChr08G01288,BPChr02G11870,BPChr11G05719,BPChr08G16723,BPChr11G05733,BPChr05G13007,BPChr08G15860,BPChr05G24755,BPChr01G16773,BPChr05…	0.00115367
Biological process	response to light intensity	GO:0009642	6	2.01715e-05	2.49942	25	176	683	12018	BPChr03G07597,BPChr07G09987,BPChr09G01223,BPChr08G05143,BPChr04G27246,BPChr06G29502,BPChr11G14274,BPChr06G29324,BPunChr33688,BPChr03G15693,BPChr05G13007,BPChr04G09389,BPChr05G12992,BPChr14G01996,BPChr11G09253,BPChr11G09263,BPChr03G09666,BPChr05G26467,BPChr10G28323,BPChr03G15061,BPChr11G05883,BPChr11G14351,BPChr03G15105,BPChr06G19486,BPChr06G29277,	0.0016963
Biological process	polysaccharide metabolic process	GO:0005976	5	2.11961e-05	2.23554	31	244	683	12018	BPunChr33231,BPChr08G15422,BPChr06G26097,BPChr05G13007,BPChr09G06477,BPChr02G10571,BPChr13G24605,BPChr12G26832,BPChr05G12992,BPunChr33603,BPunChr33600,BPChr08G22998,BPChr11G01745,BPChr08G20378,BPChr11G07247,BPChr06G25448,BPChr08G25542,BPChr06G26101,BPChr05G26467,BPChr05G26468,BPChr01G22760,BPChr11G14388,BPChr02G10607,BPChr07G14144,BPChr11G28737,BPChr13G02543,BPChr11G05881,BPChr11G28751,BPChr11G26…	0.00172845
Biological process	generation of precursor metabolites and energy	GO:0006091	4	2.18055e-05	2.19949	32	256	683	12018	BPChr05G31782,BPChr13G08971,BPChr07G09987,BPChr07G09995,BPChr13G08901,BPChr14G05533,BPChr14G05457,BPChr14G05470,BPunChr33231,BPChr09G04044,BPChr05G13007,BPChr06G31011,BPChr04G24519,BPChr12G26832,BPChr05G12992,BPChr08G22998,BPChr14G09139,BPChr05G31662,BPChr09G25312,BPChr05G26467,BPChr05G26468,BPChr06G30651,BPChr11G14388,BPChr09G24064,BPChr08G24196,BPChr11G05883,BPChr11G28751,BPChr03G15105,BPChr11G…	0.00172584
Biological process	carbohydrate metabolic process	GO:0005975	4	2.36473e-05	1.84231	49	468	683	12018	BPChr11G07163,BPChr07G09995,BPChr05G07841,BPChr07G07722,BPChr07G07731,BPunChr33231,BPChr08G15422,BPChr01G31952,BPChr14G27046,BPChr11G05719,BPChr14G27058,BPChr06G31438,BPChr06G26097,BPChr11G05733,BPChr05G13007,BPChr09G06477,BPChr02G10571,BPChr12G26814,BPChr13G24605,BPChr12G26832,BPChr05G12992,BPunChr33603,BPunChr33600,BPChr08G22998,BPChr11G01745,BPChr08G20378,BPChr11G07247,BPChr05G31662,BPChr12G25…	0.00181814
Biological process	carbohydrate catabolic process	GO:0016052	5	2.3744e-05	2.81534	20	125	683	12018	BPChr07G09995,BPunChr33231,BPChr08G15422,BPChr06G26097,BPChr09G06477,BPChr12G26832,BPunChr33603,BPunChr33600,BPChr11G01745,BPChr08G20378,BPChr05G31662,BPChr08G25542,BPChr06G26101,BPChr01G22760,BPChr11G14388,BPChr07G14144,BPChr13G02543,BPChr11G28751,BPChr11G26926,BPChr12G11478,	0.00177486
Biological process	response to acid chemical	GO:0001101	4	2.55608e-05	1.44312	114	1390	683	12018	BPChr10G24049,BPChr14G27906,BPChr03G11611,BPChr08G24774,BPChr12G25899,BPChr09G12112,BPChr13G17242,BPChr09G01223,BPChr06G02222,BPChr09G04737,BPChr13G07696,BPChr03G18211,BPChr14G25321,BPChr07G26442,BPChr07G18839,BPChr11G05795,BPChr13G21921,BPChr05G15017,BPChr08G24163,BPChr07G18868,BPChr04G27261,BPChr06G29517,BPChr11G14279,BPChr06G19503,BPChr05G15029,BPChr11G15545,BPChr06G32501,BPChr09G20109,BPChr08…	0.00185903
Biological process	response to abscisic acid	GO:0009737	6	2.57403e-05	1.70644	61	629	683	12018	BPChr10G24049,BPChr14G27906,BPChr03G11611,BPChr13G17242,BPChr09G01223,BPChr09G04737,BPChr03G18211,BPChr14G25321,BPChr07G26442,BPChr11G05795,BPChr05G15017,BPChr06G29517,BPChr11G14279,BPChr05G15029,BPChr11G15545,BPChr06G32501,BPChr09G20109,BPChr08G16723,BPChr05G13007,BPChr08G15860,BPChr05G24755,BPChr01G16773,BPChr05G12992,BPChr06G31245,BPunChr32788,BPChr04G03643,BPChr01G16942,BPChr14G32468,BPChr07G…	0.00182282
Biological process	response to stress	GO:0006950	3	3.01089e-05	1.25298	231	3244	683	12018	BPChr12G24115,BPChr14G27906,BPChr05G17471,BPChr03G11611,BPChr03G07597,BPChr08G24774,BPChr09G12131,BPChr12G25898,BPChr08G10768,BPChr12G25899,BPChr06G02200,BPChr11G07342,BPChr13G17259,BPChr06G02239,BPChr13G17242,BPChr09G01223,BPChr06G02222,BPChr13G07696,BPChr01G19034,BPChr02G20792,BPChr06G30722,BPChr08G05143,BPChr02G11846,BPChr02G11843,BPChr04G31973,BPChr11G14070,BPChr06G29502,BPChr10G21601,BPChr11…	0.00207752
Biological process	peptidyl-threonine phosphorylation	GO:0018107	10	3.40385e-05	5.8653	8	24	683	12018	BPChr05G22418,BPChr06G04895,BPChr14G02034,BPChr06G32501,BPChr11G17708,BPChr14G32468,BPChr07G32370,BPChr01G32530,	0.00228994
Biological process	peptidyl-threonine modification	GO:0018210	9	3.40385e-05	5.8653	8	24	683	12018	BPChr05G22418,BPChr06G04895,BPChr14G02034,BPChr06G32501,BPChr11G17708,BPChr14G32468,BPChr07G32370,BPChr01G32530,	0.00228994
Biological process	cellular response to heat	GO:0034605	6	3.63931e-05	4.6305	10	38	683	12018	BPChr05G17471,BPChr02G18017,BPChr01G31952,BPChr12G06146,BPChr03G15693,BPChr04G09389,BPChr03G13873,BPChr14G01996,BPChr14G09145,BPChr13G10390,	0.00233176
Biological process	response to salt	GO:1902074	4	4.7581e-05	5.63069	8	25	683	12018	BPChr11G05795,BPChr05G15017,BPChr10G04257,BPChr11G14279,BPChr10G04254,BPChr10G04312,BPChr05G14689,BPChr12G08237,	0.00297769
Biological process	inorganic anion transport	GO:0015698	7	6.37431e-05	2.80289	18	113	683	12018	BPChr08G24774,BPChr09G12131,BPChr08G10764,BPChr03G07585,BPChr10G04257,BPChr10G04254,BPChr08G16209,BPChr08G01291,BPChr12G28116,BPChr06G08456,BPChr09G20198,BPChr10G04312,BPChr12G25179,BPChr08G13298,BPChr06G19428,BPChr06G19479,BPChr11G26918,BPChr13G10339,	0.00389847
Biological process	response to alcohol	GO:0097305	5	7.37509e-05	1.64624	61	652	683	12018	BPChr10G24049,BPChr14G27906,BPChr03G11611,BPChr13G17242,BPChr09G01223,BPChr09G04737,BPChr03G18211,BPChr14G25321,BPChr07G26442,BPChr11G05795,BPChr05G15017,BPChr06G29517,BPChr11G14279,BPChr05G15029,BPChr11G15545,BPChr06G32501,BPChr09G20109,BPChr08G16723,BPChr05G13007,BPChr08G15860,BPChr05G24755,BPChr01G16773,BPChr05G12992,BPChr06G31245,BPunChr32788,BPChr04G03643,BPChr01G16942,BPChr14G32468,BPChr07G…	0.0044103
Biological process	galactose metabolic process	GO:0006012	8	0.000105969	7.03836	6	15	683	12018	BPChr05G13007,BPChr05G12992,BPChr08G22998,BPChr05G26467,BPChr05G26468,BPChr05G22475,	0.00619919
Biological process	response to toxic substance	GO:0009636	4	0.000127095	1.96151	34	305	683	12018	BPChr03G07597,BPChr08G05143,BPChr02G11843,BPChr06G29502,BPChr14G26659,BPChr14G27744,BPChr11G05795,BPChr08G24163,BPChr11G15545,BPChr08G01288,BPChr06G29324,BPChr05G22199,BPChr03G15693,BPChr05G13007,BPChr06G31011,BPChr04G09389,BPChr05G12992,BPChr14G12825,BPChr01G16942,BPChr14G01996,BPChr11G09253,BPChr11G09263,BPChr10G04329,BPChr10G04339,BPChr05G26467,BPChr08G26672,BPChr11G07431,BPChr10G28323,BPChr06…	0.00727684
Biological process	transmembrane transport	GO:0055085	5	0.000143837	1.46914	87	1042	683	12018	BPChr03G11645,BPChr10G24049,BPChr03G00749,BPChr13G08972,BPChr01G16814,BPChr12G02773,BPChr12G02772,BPChr09G12131,BPChr01G10688,BPChr08G10764,BPChr13G17242,BPChr09G04737,BPChr05G26589,BPChr14G27745,BPChr01G10668,BPChr09G20604,BPChr07G18839,BPChr03G07585,BPChr13G21921,BPChr10G17578,BPChr11G26268,BPChr08G15365,BPChr10G04257,BPChr10G04254,BPChr06G19503,BPChr08G16209,BPChr12G06123,BPChr11G05742,BPChr11…	0.00806384
Biological process	glycogen biosynthetic process	GO:0005978	10	0.000161435	6.59846	6	16	683	12018	BPChr05G13007,BPChr05G12992,BPChr08G22998,BPChr05G26467,BPChr05G26468,BPChr05G22475,	0.00886577
Biological process	response to water	GO:0009414	6	0.000261251	1.75541	42	421	683	12018	BPChr14G27906,BPChr08G24774,BPChr12G25899,BPChr09G01223,BPChr13G07696,BPChr13G21921,BPChr11G14279,BPChr09G20109,BPChr08G01288,BPChr08G16723,BPChr05G22199,BPChr05G13007,BPChr05G12992,BPunChr33603,BPunChr33600,BPChr05G21038,BPunChr32788,BPChr04G03643,BPChr05G24761,BPChr03G09666,BPChr08G18143,BPChr01G24983,BPChr09G04020,BPChr10G28357,BPChr05G26467,BPChr05G26468,BPChr09G20962,BPChr11G14388,BPChr09G29…	0.0140606
Biological process	terpene biosynthetic process	GO:0046246	8	0.000266404	4.06059	9	39	683	12018	BPChr04G21907,BPChr11G28651,BPChr11G28636,BPChr14G20652,BPunChr33412,BPChr06G08062,BPChr11G20484,BPChr13G07716,BPChr06G08169,	0.0140567
Biological process	response to salt stress	GO:0009651	5	0.000270276	1.61565	55	599	683	12018	BPChr14G27906,BPChr09G01223,BPChr02G11843,BPChr07G26442,BPChr14G05533,BPChr11G05795,BPChr10G21801,BPChr06G29517,BPChr10G04257,BPChr11G14279,BPChr10G04254,BPChr14G05457,BPChr11G15545,BPChr09G20109,BPChr14G05470,BPChr08G01288,BPChr02G11870,BPChr11G05719,BPChr08G16723,BPChr11G05733,BPChr05G13007,BPChr08G15860,BPChr05G24755,BPChr05G12992,BPChr05G21038,BPChr05G24306,BPChr10G04312,BPChr01G00567,BPChr01…	0.0139868
Biological process	chaperone-mediated protein folding	GO:0061077	4	0.000298604	3.19925	12	66	683	12018	BPChr10G03308,BPChr05G07841,BPChr10G21601,BPChr05G31516,BPChr03G13873,BPChr10G15222,BPChr10G15245,BPChr13G10390,BPChr02G25954,BPChr07G24808,BPChr01G16864,BPChr07G32007,	0.0151612
Biological process	response to water	GO:0009415	5	0.000319389	1.73889	42	425	683	12018	BPChr14G27906,BPChr08G24774,BPChr12G25899,BPChr09G01223,BPChr13G07696,BPChr13G21921,BPChr11G14279,BPChr09G20109,BPChr08G01288,BPChr08G16723,BPChr05G22199,BPChr05G13007,BPChr05G12992,BPunChr33603,BPunChr33600,BPChr05G21038,BPunChr32788,BPChr04G03643,BPChr05G24761,BPChr03G09666,BPChr08G18143,BPChr01G24983,BPChr09G04020,BPChr10G28357,BPChr05G26467,BPChr05G26468,BPChr09G20962,BPChr11G14388,BPChr09G29…	0.0159162
Biological process	response to endogenous stimulus	GO:0009719	3	0.000341044	1.31156	137	1838	683	12018	BPChr10G24049,BPChr14G27906,BPChr03G11611,BPChr08G24774,BPChr09G12112,BPChr13G17242,BPChr09G01223,BPChr06G02222,BPChr09G04737,BPChr06G30722,BPChr04G27246,BPChr03G18211,BPChr14G25321,BPChr13G23043,BPChr07G26442,BPChr07G18839,BPChr14G05533,BPChr11G05795,BPChr05G15017,BPChr08G24163,BPChr07G18868,BPChr04G27261,BPChr06G29517,BPChr11G14279,BPChr06G19503,BPChr09G12181,BPChr05G15029,BPChr11G05742,BPChr14…	0.0166863
Biological process	response to chitin	GO:0010200	6	0.000364443	2.26696	21	163	683	12018	BPChr14G27906,BPChr09G01223,BPChr06G02222,BPChr06G27318,BPChr08G27623,BPChr11G32507,BPChr08G16243,BPChr08G24163,BPChr01G31956,BPChr01G31966,BPChr03G15693,BPChr06G31245,BPChr14G01996,BPChr06G31082,BPChr02G18964,BPChr06G25289,BPChr04G27159,BPChr01G00071,BPChr11G05814,BPChr14G01859,BPChr07G32009,	0.0175128
Biological process	response to external stimulus	GO:0009605	3	0.000529251	1.32431	122	1621	683	12018	BPChr12G24115,BPChr01G26609,BPChr12G02773,BPChr12G02772,BPChr08G24774,BPChr09G12131,BPChr06G02239,BPChr13G17242,BPChr06G02222,BPChr09G04143,BPChr02G11846,BPChr04G31973,BPChr06G29502,BPChr10G21601,BPChr14G27744,BPChr08G16243,BPChr03G15132,BPChr09G04130,BPChr14G05533,BPChr07G07727,BPChr05G31516,BPChr13G21921,BPChr05G15017,BPChr08G24163,BPChr10G15157,BPChr10G04257,BPChr11G14279,BPChr10G04254,BPChr06…	0.0249862
Biological process	response to hormone	GO:0009725	5	0.000530223	1.30633	132	1778	683	12018	BPChr10G24049,BPChr14G27906,BPChr03G11611,BPChr08G24774,BPChr09G12112,BPChr13G17242,BPChr09G01223,BPChr06G02222,BPChr09G04737,BPChr06G30722,BPChr04G27246,BPChr03G18211,BPChr14G25321,BPChr13G23043,BPChr07G26442,BPChr14G05533,BPChr11G05795,BPChr05G15017,BPChr08G24163,BPChr07G18868,BPChr04G27261,BPChr06G29517,BPChr11G14279,BPChr06G19503,BPChr09G12181,BPChr05G15029,BPChr11G05742,BPChr14G05457,BPChr11…	0.0246005
Biological process	terpene metabolic process	GO:0042214	7	0.000578251	3.68286	9	43	683	12018	BPChr04G21907,BPChr11G28651,BPChr11G28636,BPChr14G20652,BPunChr33412,BPChr06G08062,BPChr11G20484,BPChr13G07716,BPChr06G08169,	0.0263741
Biological process	drug transmembrane transport	GO:0006855	7	0.000693165	2.39304	17	125	683	12018	BPChr10G24049,BPChr12G02773,BPChr12G02772,BPChr13G17242,BPChr06G19503,BPChr12G02801,BPChr11G09238,BPChr01G23690,BPChr09G04020,BPChr04G27143,BPChr06G19428,BPChr13G10326,BPChr02G23375,BPChr06G19479,BPChr12G02759,BPunChr32670,BPunChr32674,	0.0310885
Biological process	cellular response to extracellular stimulus	GO:0031668	5	0.000749797	1.90963	28	258	683	12018	BPChr08G24774,BPChr09G12131,BPChr13G17242,BPChr04G31973,BPChr08G16209,BPChr11G15545,BPChr08G01291,BPChr05G22199,BPChr11G09278,BPChr10G03515,BPChr06G31245,BPChr03G09666,BPChr06G31082,BPChr12G25179,BPChr05G26468,BPChr03G15061,BPChr08G13298,BPChr06G19428,BPChr09G08313,BPChr01G26470,BPChr08G20423,BPChr06G19479,BPChr13G03828,BPChr06G09474,BPChr11G09356,BPChr07G32009,BPChr05G22475,BPChr07G02855,	0.032027
Biological process	response to organic substance	GO:0010033	4	0.00075626	1.25518	161	2257	683	12018	BPChr12G24115,BPChr10G24049,BPChr14G27906,BPChr03G11611,BPChr08G24774,BPChr09G12112,BPChr13G17242,BPChr09G01223,BPChr06G02222,BPChr09G04737,BPChr07G18809,BPChr06G27318,BPChr06G30722,BPChr04G27246,BPChr03G18211,BPChr08G27623,BPChr11G32507,BPChr14G25321,BPChr13G23043,BPChr07G26442,BPChr07G18839,BPChr08G16243,BPChr02G18017,BPChr14G05533,BPChr11G05795,BPChr07G07722,BPChr05G15017,BPChr07G07731,BPChr08…	0.0317984
Biological process	sulfate transport	GO:0008272	8	0.000760603	6.28425	5	14	683	12018	BPChr08G24774,BPChr08G10764,BPChr03G07585,BPChr06G08456,BPChr12G25179,	0.031489
Biological process	response to oxidative stress	GO:0006979	4	0.000831641	1.64842	43	459	683	12018	BPChr03G07597,BPChr13G17242,BPChr09G01223,BPChr06G30722,BPChr08G05143,BPChr06G29502,BPChr11G05795,BPChr08G24163,BPChr11G14279,BPChr06G19503,BPChr06G30757,BPChr06G29324,BPChr05G22199,BPChr03G15693,BPChr05G13007,BPChr06G31011,BPChr04G09389,BPChr05G12992,BPChr14G12825,BPChr08G22998,BPChr01G16942,BPChr14G01996,BPChr11G09253,BPChr11G09263,BPChr10G04329,BPChr10G04339,BPChr03G09666,BPChr05G26467,BPChr05…	0.0339083
Biological process	inorganic anion transmembrane transport	GO:0098661	8	0.000866717	3.0243	11	64	683	12018	BPChr09G12131,BPChr08G10764,BPChr03G07585,BPChr10G04257,BPChr10G04254,BPChr08G16209,BPChr06G08456,BPChr10G04312,BPChr08G13298,BPChr06G19428,BPChr06G19479,	0.034811
Biological process	drug transport	GO:0015893	6	0.000910334	2.33696	17	128	683	12018	BPChr10G24049,BPChr12G02773,BPChr12G02772,BPChr13G17242,BPChr06G19503,BPChr12G02801,BPChr11G09238,BPChr01G23690,BPChr09G04020,BPChr04G27143,BPChr06G19428,BPChr13G10326,BPChr02G23375,BPChr06G19479,BPChr12G02759,BPunChr32670,BPunChr32674,	0.0360251
Biological process	organic hydroxy compound biosynthetic process	GO:1901617	5	0.000915332	1.93853	26	236	683	12018	BPChr12G24115,BPChr09G29823,BPChr07G09987,BPChr01G19034,BPChr14G25343,BPChr14G27744,BPChr14G02019,BPChr11G15545,BPChr12G28172,BPChr05G22399,BPChr04G18053,BPChr04G18051,BPChr04G18049,BPChr01G16944,BPChr06G21280,BPChr04G16011,BPChr06G16592,BPChr03G15061,BPChr13G04462,BPChr14G02064,BPChr11G05659,BPChr02G23513,BPChr04G00445,BPChr05G22440,BPChr07G30020,BPChr13G10361,	0.0356979
Biological process	anion transmembrane transport	GO:0098656	7	0.000967438	1.83291	30	288	683	12018	BPChr03G11645,BPChr03G00749,BPChr09G12131,BPChr08G10764,BPChr13G17242,BPChr03G07585,BPChr10G04257,BPChr10G04254,BPChr08G16209,BPChr08G01291,BPChr12G28116,BPChr14G04158,BPChr06G08456,BPChr09G20198,BPChr11G09238,BPChr13G09015,BPChr11G07078,BPChr10G04312,BPChr11G01725,BPChr03G09666,BPChr07G09872,BPChr03G18528,BPChr08G13298,BPChr06G19428,BPChr06G19479,BPChr11G09183,BPChr06G09474,BPChr11G26918,BPChr13…	0.0371911
Biological process	single-organism carbohydrate metabolic process	GO:0044723	5	0.00100839	1.72134	36	368	683	12018	BPChr11G07163,BPChr07G09995,BPChr07G07722,BPChr07G07731,BPunChr33231,BPChr01G31952,BPChr14G27046,BPChr11G05719,BPChr14G27058,BPChr06G31438,BPChr11G05733,BPChr05G13007,BPChr09G06477,BPChr02G10571,BPChr12G26814,BPChr13G24605,BPChr12G26832,BPChr05G12992,BPChr08G22998,BPChr11G07247,BPChr05G31662,BPChr12G25764,BPChr06G25448,BPChr05G04682,BPChr05G26467,BPChr05G26468,BPChr11G14388,BPChr02G10607,BPChr03G…	0.0382192
Biological process	response to iron ion	GO:0010039	6	0.00102405	2.46672	15	107	683	12018	BPChr13G17242,BPChr06G30722,BPChr11G28651,BPChr06G30757,BPChr11G28636,BPChr14G20652,BPunChr33412,BPChr06G08062,BPChr06G08095,BPChr11G20484,BPChr03G02614,BPChr06G02132,BPChr06G30677,BPChr06G31334,BPChr06G08169,	0.0382738
Biological process	response to lipid	GO:0033993	5	0.00106887	1.4393	71	868	683	12018	BPChr10G24049,BPChr14G27906,BPChr03G11611,BPChr09G12112,BPChr13G17242,BPChr09G01223,BPChr09G04737,BPChr03G18211,BPChr14G25321,BPChr07G26442,BPChr11G05795,BPChr05G15017,BPChr06G29517,BPChr11G14279,BPChr05G15029,BPChr11G15545,BPChr06G32501,BPChr09G20109,BPChr05G21062,BPChr04G18051,BPChr04G18049,BPChr08G16723,BPChr05G13007,BPChr08G15860,BPChr05G24755,BPChr01G16773,BPChr05G12992,BPChr06G31245,BPunChr…	0.0394016
Biological process	hexose metabolic process	GO:0019318	7	0.00108619	3.14213	10	56	683	12018	BPChr11G05719,BPChr11G05733,BPChr05G13007,BPChr05G12992,BPChr08G22998,BPChr05G31662,BPChr05G26467,BPChr05G26468,BPChr11G03805,BPChr05G22475,	0.039499
Biological process	cellular response to chemical stimulus	GO:0070887	4	0.00117548	1.32589	107	1420	683	12018	BPChr14G27906,BPChr03G11611,BPChr08G24774,BPChr09G12112,BPChr13G17242,BPChr06G02222,BPChr06G30722,BPChr02G11843,BPChr03G18211,BPChr10G21601,BPChr14G26659,BPChr08G05123,BPChr14G25321,BPChr07G26442,BPChr07G18839,BPChr09G04130,BPChr07G07722,BPChr11G28651,BPChr05G31516,BPChr05G15017,BPChr07G07731,BPChr07G18868,BPChr10G04257,BPChr11G14279,BPChr10G04254,BPChr09G12181,BPChr05G15029,BPChr11G05742,BPChr06…	0.0421761
Biological process	ion transport	GO:0006811	5	0.00119055	1.44682	68	827	683	12018	BPChr03G11645,BPChr10G24049,BPChr03G00749,BPChr13G08972,BPChr01G16814,BPChr08G24774,BPChr09G12131,BPChr08G10764,BPChr13G17242,BPChr09G04737,BPChr09G16368,BPChr05G26589,BPChr09G20604,BPChr07G18839,BPChr14G05501,BPChr03G07585,BPChr13G21921,BPChr06G29512,BPChr08G15365,BPChr10G04257,BPChr10G04254,BPChr06G19503,BPChr08G16209,BPChr06G30757,BPChr08G01291,BPChr09G20572,BPChr12G28116,BPChr10G21775,BPChr14…	0.0421549
Biological process	monosaccharide metabolic process	GO:0005996	6	0.00119872	2.62927	13	87	683	12018	BPChr11G05719,BPChr11G05733,BPChr05G13007,BPChr12G26814,BPChr13G24605,BPChr05G12992,BPChr08G22998,BPChr05G31662,BPChr05G04682,BPChr05G26467,BPChr05G26468,BPChr11G03805,BPChr05G22475,	0.0418928
Biological process	cellular transition metal ion homeostasis	GO:0046916	10	0.00125912	2.74222	12	77	683	12018	BPChr13G17242,BPChr04G31973,BPChr09G16368,BPChr06G29512,BPChr06G30757,BPChr06G31011,BPChr02G23495,BPChr03G02614,BPChr14G09178,BPChr06G30651,BPChr06G30677,BPChr06G09450,	0.0434397
Biological process	cellular response to inorganic substance	GO:0071241	5	0.001331	2.19949	18	144	683	12018	BPChr13G17242,BPChr06G30722,BPChr10G21601,BPChr08G05123,BPChr11G28651,BPChr05G31516,BPChr11G28636,BPChr14G20652,BPunChr33412,BPChr06G08062,BPChr06G08095,BPChr11G20484,BPChr03G02614,BPChr06G02132,BPChr02G25954,BPChr06G31334,BPChr11G26918,BPChr06G08169,	0.0453381
Biological process	trehalose biosynthetic process	GO:0005992	9	0.00150905	5.49872	5	16	683	12018	BPChr11G07163,BPChr07G07722,BPChr07G07731,BPChr14G27046,BPChr14G27058,	0.0507606
Biological process	defense response, incompatible interaction	GO:0009814	7	0.00152454	1.92832	24	219	683	12018	BPChr12G24115,BPChr06G02239,BPChr06G29502,BPChr10G21601,BPChr08G16243,BPChr09G04130,BPChr07G07727,BPChr05G31516,BPChr08G24163,BPChr14G27019,BPChr14G27016,BPChr06G29324,BPChr02G11870,BPChr06G29598,BPChr09G06477,BPChr06G31245,BPChr03G09666,BPChr06G11023,BPChr06G31082,BPChr06G11046,BPChr05G31605,BPChr02G25954,BPChr05G14646,BPChr12G28099,	0.0506487
Biological process	cellular response to external stimulus	GO:0071496	4	0.00168259	1.81134	28	272	683	12018	BPChr08G24774,BPChr09G12131,BPChr13G17242,BPChr04G31973,BPChr08G16209,BPChr11G15545,BPChr08G01291,BPChr05G22199,BPChr11G09278,BPChr10G03515,BPChr06G31245,BPChr03G09666,BPChr06G31082,BPChr12G25179,BPChr05G26468,BPChr03G15061,BPChr08G13298,BPChr06G19428,BPChr09G08313,BPChr01G26470,BPChr08G20423,BPChr06G19479,BPChr13G03828,BPChr06G09474,BPChr11G09356,BPChr07G32009,BPChr05G22475,BPChr07G02855,	0.0545526
Biological process	cellular response to metal ion	GO:0071248	6	0.00173238	2.27044	16	124	683	12018	BPChr13G17242,BPChr06G30722,BPChr10G21601,BPChr11G28651,BPChr05G31516,BPChr11G28636,BPChr14G20652,BPunChr33412,BPChr06G08062,BPChr06G08095,BPChr11G20484,BPChr03G02614,BPChr06G02132,BPChr02G25954,BPChr06G31334,BPChr06G08169,	0.055498
Biological process	ion transmembrane transport	GO:0034220	6	0.00173599	1.48149	57	677	683	12018	BPChr03G11645,BPChr10G24049,BPChr03G00749,BPChr13G08972,BPChr01G16814,BPChr09G12131,BPChr08G10764,BPChr13G17242,BPChr09G04737,BPChr05G26589,BPChr09G20604,BPChr07G18839,BPChr03G07585,BPChr13G21921,BPChr08G15365,BPChr10G04257,BPChr10G04254,BPChr08G16209,BPChr08G01291,BPChr09G20572,BPChr12G28116,BPChr10G21775,BPChr14G04158,BPChr06G08456,BPChr09G20198,BPChr05G24306,BPChr11G09238,BPChr13G09015,BPChr11…	0.0549594
Biological process	abscisic acid-activated signaling pathway	GO:0009738	7	0.00202997	1.91804	23	211	683	12018	BPChr14G27906,BPChr03G11611,BPChr14G25321,BPChr07G26442,BPChr05G15017,BPChr11G14279,BPChr05G15029,BPChr06G32501,BPChr09G20109,BPChr08G15860,BPChr01G16773,BPChr04G03643,BPChr14G32468,BPChr07G09812,BPChr10G28357,BPChr08G03060,BPChr09G29745,BPChr05G14689,BPChr04G00445,BPChr12G08237,BPChr14G01844,BPChr08G11323,BPChr06G22236,	0.0635192
Biological process	cellular response to iron ion	GO:0071281	7	0.00222571	2.45964	13	93	683	12018	BPChr13G17242,BPChr06G30722,BPChr11G28651,BPChr11G28636,BPChr14G20652,BPunChr33412,BPChr06G08062,BPChr06G08095,BPChr11G20484,BPChr03G02614,BPChr06G02132,BPChr06G31334,BPChr06G08169,	0.0688434
Biological process	cellular carbohydrate biosynthetic process	GO:0034637	7	0.00227909	2.09752	18	151	683	12018	BPChr11G07163,BPChr07G07722,BPChr07G07731,BPChr14G27046,BPChr14G27058,BPChr05G13007,BPChr02G10571,BPChr13G24605,BPChr05G12992,BPChr08G22998,BPChr11G07247,BPChr06G25448,BPChr05G26467,BPChr05G26468,BPChr02G10607,BPChr03G15061,BPChr11G28737,BPChr05G22475,	0.0696936
Biological process	photosynthesis	GO:0015979	4	0.00244905	2.13665	17	140	683	12018	BPChr09G01223,BPChr14G05533,BPChr06G30757,BPChr14G05457,BPChr14G05470,BPChr01G31952,BPChr06G31438,BPChr04G24519,BPChr14G09139,BPChr09G25312,BPChr06G13478,BPChr09G24064,BPChr08G24196,BPChr11G05883,BPChr06G30677,BPChr03G15105,BPChr11G17821,	0.0740493
Biological process	response to metal ion	GO:0010038	5	0.00252214	1.52303	47	543	683	12018	BPChr03G00749,BPChr13G17242,BPChr06G30722,BPChr02G11843,BPChr10G21601,BPChr11G28651,BPChr05G31516,BPChr13G21921,BPChr06G08613,BPChr06G29517,BPChr06G30757,BPChr08G01288,BPChr02G00330,BPChr11G28636,BPChr14G20652,BPChr06G31438,BPChr05G22199,BPChr11G09238,BPunChr33412,BPChr11G09253,BPChr11G09263,BPChr06G08062,BPChr10G04329,BPChr08G05091,BPChr06G08095,BPChr10G04339,BPChr11G20484,BPChr14G02754,BPChr03G…	0.075412
Biological process	protein folding	GO:0006457	3	0.00261215	2.18244	16	129	683	12018	BPChr10G03308,BPChr05G07841,BPChr06G29502,BPChr10G21601,BPChr05G31516,BPChr06G29324,BPChr12G29238,BPChr03G13873,BPChr10G15222,BPChr10G15245,BPChr13G10390,BPChr02G25954,BPunChr32690,BPChr07G24808,BPChr01G16864,BPChr07G32007,	0.0772449
Biological process	response to ethylene	GO:0009723	6	0.00270881	1.75333	28	281	683	12018	BPChr13G17242,BPChr06G30722,BPChr04G27246,BPChr14G05533,BPChr11G05795,BPChr06G29517,BPChr06G19503,BPChr09G12181,BPChr14G05457,BPunChr33213,BPChr14G05470,BPChr08G13235,BPChr08G16723,BPChr11G01787,BPunChr32788,BPChr08G17078,BPChr14G02754,BPChr05G31605,BPChr08G26672,BPChr05G17520,BPChr11G18733,BPChr04G27159,BPChr11G06915,BPChr06G31334,BPChr04G00445,BPChr11G10160,BPChr14G01859,BPChr01G13794,	0.0792327
Biological process	plastid organization	GO:0009657	5	0.0027454	1.87364	23	216	683	12018	BPChr06G27318,BPChr14G05533,BPChr06G30522,BPChr14G05457,BPChr06G31427,BPChr14G05470,BPChr02G18040,BPChr13G24696,BPChr01G16773,BPChr04G03643,BPChr04G14232,BPChr10G03450,BPChr10G28357,BPChr08G16129,BPChr08G27552,BPChr11G06770,BPChr11G06951,BPChr08G24196,BPChr11G05883,BPChr11G14351,BPChr06G30234,BPChr12G11478,BPChr13G10361,	0.0794395
Biological process	sulfur compound transport	GO:0072348	6	0.00285092	4.06059	6	26	683	12018	BPChr08G24774,BPChr08G10764,BPChr03G07585,BPChr06G08456,BPChr11G07078,BPChr12G25179,	0.0816152
Biological process	anion transport	GO:0006820	6	0.00291811	1.65904	33	350	683	12018	BPChr03G11645,BPChr03G00749,BPChr08G24774,BPChr09G12131,BPChr08G10764,BPChr13G17242,BPChr03G07585,BPChr10G04257,BPChr10G04254,BPChr06G19503,BPChr08G16209,BPChr08G01291,BPChr12G28116,BPChr14G04158,BPChr06G08456,BPChr09G20198,BPChr11G09238,BPChr13G09015,BPChr11G07078,BPChr10G04312,BPChr11G01725,BPChr03G09666,BPChr07G09872,BPChr12G25179,BPChr03G18528,BPChr08G13298,BPChr06G19428,BPChr06G19479,BPChr11…	0.0826594
Biological process	cellular response to stimulus	GO:0051716	3	0.00295841	1.19	192	2839	683	12018	BPChr12G24115,BPChr01G26609,BPChr01G20286,BPChr14G27906,BPChr05G17471,BPChr03G11611,BPChr08G24774,BPChr09G12131,BPChr05G22418,BPChr06G02200,BPChr11G07342,BPChr13G17259,BPChr06G04895,BPChr09G12112,BPChr13G17242,BPChr06G04881,BPChr06G02222,BPChr02G20792,BPChr06G27318,BPChr06G30722,BPChr09G04143,BPChr02G11843,BPChr03G18211,BPChr04G31973,BPChr11G14070,BPChr10G21601,BPChr08G27623,BPChr14G27748,BPChr14…	0.0829278
Biological process	trehalose metabolic process	GO:0005991	8	0.00348543	4.6305	5	19	683	12018	BPChr11G07163,BPChr07G07722,BPChr07G07731,BPChr14G27046,BPChr14G27058,	0.0830025
Biological process	response to extracellular stimulus	GO:0009991	4	0.00357522	1.70094	29	300	683	12018	BPChr08G24774,BPChr09G12131,BPChr13G17242,BPChr04G31973,BPChr08G16209,BPChr11G15545,BPChr08G01291,BPChr05G22199,BPChr11G09278,BPChr10G03515,BPChr06G31245,BPChr03G09666,BPChr06G31082,BPChr06G13478,BPChr12G25179,BPChr05G26468,BPChr03G15061,BPChr08G13298,BPChr06G19428,BPChr09G08313,BPChr01G26470,BPChr08G20423,BPChr06G19479,BPChr13G03828,BPChr06G09474,BPChr11G09356,BPChr07G32009,BPChr05G22475,BPChr07…	0.0836602
Biological process	organic hydroxy compound metabolic process	GO:1901615	4	0.00382902	1.61692	34	370	683	12018	BPChr12G24115,BPChr09G29823,BPChr07G09987,BPChr06G02239,BPChr01G19034,BPChr14G25343,BPChr06G30700,BPChr14G27744,BPChr14G02019,BPChr09G17892,BPChr11G15545,BPChr12G28172,BPChr03G02594,BPChr06G30544,BPChr05G22399,BPChr04G18053,BPChr04G18051,BPChr04G18049,BPChr05G24311,BPChr01G16944,BPChr06G21280,BPChr13G07716,BPChr04G16011,BPChr06G16592,BPChr03G15061,BPChr13G04462,BPChr14G02064,BPChr11G05659,BPChr02…	0.0888268
Biological process	cellular response to abscisic acid stimulus	GO:0071215	7	0.00425706	1.75959	25	250	683	12018	BPChr14G27906,BPChr03G11611,BPChr03G18211,BPChr14G25321,BPChr07G26442,BPChr05G15017,BPChr11G14279,BPChr05G15029,BPChr06G32501,BPChr09G20109,BPChr08G15860,BPChr01G16773,BPChr04G03643,BPChr14G32468,BPChr07G09812,BPChr10G28357,BPChr08G03060,BPChr09G29745,BPChr05G14689,BPChr04G00445,BPChr12G08237,BPChr13G03828,BPChr14G01844,BPChr08G11323,BPChr06G22236,	0.0979124
Biological process	cellular response to alcohol	GO:0097306	6	0.00425706	1.75959	25	250	683	12018	BPChr14G27906,BPChr03G11611,BPChr03G18211,BPChr14G25321,BPChr07G26442,BPChr05G15017,BPChr11G14279,BPChr05G15029,BPChr06G32501,BPChr09G20109,BPChr08G15860,BPChr01G16773,BPChr04G03643,BPChr14G32468,BPChr07G09812,BPChr10G28357,BPChr08G03060,BPChr09G29745,BPChr05G14689,BPChr04G00445,BPChr12G08237,BPChr13G03828,BPChr14G01844,BPChr08G11323,BPChr06G22236,	0.0979124
Biological process	response to organonitrogen compound	GO:0010243	5	0.00429632	1.63208	32	345	683	12018	BPChr14G27906,BPChr09G01223,BPChr06G02222,BPChr06G27318,BPChr08G27623,BPChr11G32507,BPChr07G18839,BPChr08G16243,BPChr08G24163,BPChr08G01288,BPChr01G31956,BPChr01G31966,BPChr03G15693,BPChr10G03515,BPChr06G31245,BPChr14G01996,BPChr03G10890,BPChr06G31082,BPChr02G18964,BPChr07G18926,BPChr03G29004,BPChr06G25289,BPChr04G27159,BPChr03G10841,BPChr12G29137,BPChr09G08313,BPChr01G00071,BPChr11G05814,BPChr11…	0.0971545
Biological process	carbohydrate biosynthetic process	GO:0016051	6	0.00482568	1.79073	23	226	683	12018	BPChr11G07163,BPChr07G07722,BPChr07G07731,BPChr01G31952,BPChr14G27046,BPChr14G27058,BPChr06G31438,BPChr05G13007,BPChr02G10571,BPChr13G24605,BPChr05G12992,BPChr08G22998,BPChr11G07247,BPChr05G31662,BPChr06G25448,BPChr05G04682,BPChr05G26467,BPChr05G26468,BPChr02G10607,BPChr03G15061,BPChr05G01341,BPChr11G28737,BPChr05G22475,	0.108216
Biological process	cellular response to nutrient levels	GO:0031669	6	0.00484445	1.81742	22	213	683	12018	BPChr08G24774,BPChr09G12131,BPChr13G17242,BPChr04G31973,BPChr08G16209,BPChr08G01291,BPChr11G09278,BPChr10G03515,BPChr06G31245,BPChr03G09666,BPChr06G31082,BPChr12G25179,BPChr03G15061,BPChr08G13298,BPChr06G19428,BPChr09G08313,BPChr01G26470,BPChr08G20423,BPChr06G19479,BPChr11G09356,BPChr07G32009,BPChr07G02855,	0.107739
Biological process	regulation of flower development	GO:0009909	7	0.00487317	1.9551	18	162	683	12018	BPChr02G13174,BPChr02G13192,BPChr06G27318,BPChr08G28436,BPunChr33213,BPChr11G28637,BPChr06G30794,BPChr10G21792,BPChr13G24696,BPChr11G01787,BPChr09G29729,BPChr11G18733,BPChr08G27552,BPChr11G06770,BPChr06G16581,BPChr11G06951,BPChr08G28562,BPChr05G14657,	0.107489
Biological process	nitrate transport	GO:0015706	8	0.00508793	3.64053	6	29	683	12018	BPChr10G04257,BPChr10G04254,BPChr08G01291,BPChr10G04312,BPChr11G26918,BPChr13G10339,	0.111314
Biological process	plant organ senescence	GO:0090693	5	0.00519716	1.94311	18	163	683	12018	BPChr13G19850,BPChr11G05795,BPChr08G24163,BPChr11G14279,BPunChr33213,BPChr08G16994,BPChr13G24696,BPChr11G01787,BPChr04G03643,BPChr06G11023,BPChr06G11046,BPChr14G12338,BPChr06G13478,BPChr10G28357,BPChr08G27552,BPChr09G29745,BPChr11G06951,BPChr13G10339,	0.112787
Biological process	disaccharide biosynthetic process	GO:0046351	8	0.00555065	4.1895	5	21	683	12018	BPChr11G07163,BPChr07G07722,BPChr07G07731,BPChr14G27046,BPChr14G27058,	0.116694
Biological process	cellular ion homeostasis	GO:0006873	7	0.00589812	1.91955	18	165	683	12018	BPChr13G17242,BPChr04G31973,BPChr09G16368,BPChr06G29512,BPChr06G30757,BPChr06G31011,BPChr02G23495,BPChr05G24306,BPChr08G05091,BPChr14G12569,BPChr03G09666,BPChr03G02614,BPChr14G09178,BPChr06G30651,BPChr06G19428,BPChr06G30677,BPChr06G19479,BPChr06G09450,	0.123038
Biological process	cellular response to oxygen levels	GO:0071453	5	0.00606049	3.51918	6	30	683	12018	BPChr09G04130,BPChr14G20652,BPChr01G31952,BPChr03G15693,BPChr14G01996,BPChr11G20484,	0.125452
Biological process	cellular response to decreased oxygen levels	GO:0036294	6	0.00606049	3.51918	6	30	683	12018	BPChr09G04130,BPChr14G20652,BPChr01G31952,BPChr03G15693,BPChr14G01996,BPChr11G20484,	0.125452
Biological process	regulation of shoot system development	GO:0048831	6	0.00627984	1.75197	23	231	683	12018	BPChr02G13174,BPChr02G13192,BPChr08G24774,BPChr06G27318,BPChr13G19850,BPChr11G05795,BPChr08G28436,BPunChr33213,BPChr11G28637,BPChr06G30794,BPChr10G21792,BPChr13G24696,BPChr11G01787,BPChr09G29729,BPChr03G09666,BPChr11G18733,BPChr08G27552,BPChr11G06770,BPChr09G29745,BPChr06G16581,BPChr11G06951,BPChr08G28562,BPChr05G14657,	0.128023
Biological process	cellular metal ion homeostasis	GO:0006875	9	0.00647829	2.10549	14	117	683	12018	BPChr13G17242,BPChr04G31973,BPChr09G16368,BPChr06G29512,BPChr06G30757,BPChr06G31011,BPChr02G23495,BPChr14G12569,BPChr03G09666,BPChr03G02614,BPChr14G09178,BPChr06G30651,BPChr06G30677,BPChr06G09450,	0.131076
Biological process	systemic acquired resistance	GO:0009627	8	0.00656088	2.4783	10	71	683	12018	BPChr12G24115,BPChr06G02239,BPChr09G04130,BPChr07G07727,BPChr14G27016,BPChr09G06477,BPChr03G09666,BPChr05G31605,BPChr05G14646,BPChr12G28099,	0.13078
Biological process	oxidation-reduction process	GO:0055114	4	0.00665195	1.30398	83	1120	683	12018	BPChr01G26600,BPChr05G08770,BPChr09G29823,BPChr05G31782,BPChr13G08971,BPChr07G09987,BPChr09G12112,BPChr02G19941,BPChr06G30722,BPChr10G28244,BPChr04G27246,BPChr02G11843,BPChr08G10716,BPChr14G26659,BPChr06G30700,BPChr08G05123,BPChr01G22888,BPChr09G04130,BPChr13G08901,BPChr11G28651,BPChr09G16325,BPChr06G08613,BPChr13G08932,BPChr05G08744,BPChr06G30992,BPChr06G30544,BPChr05G22399,BPChr11G28636,BPChr14…	0.131621
Biological process	cellular response to abiotic stimulus	GO:0071214	4	0.00670185	1.76762	22	219	683	12018	BPChr01G26609,BPChr08G24774,BPChr06G27318,BPChr09G04143,BPChr10G04257,BPChr10G04254,BPChr06G30794,BPChr06G29383,BPChr05G22199,BPChr04G24492,BPChr10G04312,BPChr03G09666,BPChr11G07236,BPChr12G25179,BPChr05G26468,BPChr11G06770,BPChr08G24196,BPChr03G15105,BPChr13G03828,BPChr06G09474,BPChr07G30069,BPChr05G22475,	0.13164
Biological process	response to red or far red light	GO:0009639	6	0.00675645	1.85735	19	180	683	12018	BPChr01G26609,BPChr12G25898,BPChr06G27318,BPChr09G04143,BPChr04G27246,BPChr08G01288,BPChr12G28189,BPChr06G30794,BPChr06G29383,BPChr05G22199,BPChr03G09666,BPChr11G07236,BPChr08G27552,BPChr11G06770,BPChr11G06951,BPChr08G24196,BPChr11G14351,BPChr04G09407,BPChr05G14863,	0.131751
Biological process	response to red light	GO:0010114	7	0.00715881	2.59612	9	61	683	12018	BPChr12G25898,BPChr06G30794,BPChr03G09666,BPChr11G07236,BPChr08G27552,BPChr11G06951,BPChr08G24196,BPChr11G14351,BPChr05G14863,	0.138593
Biological process	response to nitrogen compound	GO:1901698	4	0.00719938	1.46079	44	530	683	12018	BPChr14G27906,BPChr13G17242,BPChr09G01223,BPChr06G02222,BPChr06G27318,BPChr06G30722,BPChr08G27623,BPChr11G32507,BPChr08G05123,BPChr07G18839,BPChr08G16243,BPChr14G05533,BPChr08G24163,BPChr14G05457,BPChr14G05470,BPChr08G01288,BPChr01G31956,BPChr01G31966,BPChr03G15693,BPChr10G03515,BPChr06G31245,BPChr14G01996,BPChr03G10890,BPChr06G31082,BPChr02G18964,BPChr07G18926,BPChr03G29004,BPChr06G25289,BPChr04…	0.138382
Biological process	regulation of response to alcohol	GO:1901419	5	0.0073923	2.0148	15	131	683	12018	BPChr03G11611,BPChr05G15017,BPChr06G32501,BPChr09G20109,BPChr08G15860,BPChr01G16773,BPChr04G03643,BPChr14G32468,BPChr10G28357,BPChr08G03060,BPChr09G29745,BPChr05G14689,BPChr04G00445,BPChr12G08237,BPChr06G22236,	0.141083
Biological process	regulation of cellular response to alcohol	GO:1905957	6	0.0073923	2.0148	15	131	683	12018	BPChr03G11611,BPChr05G15017,BPChr06G32501,BPChr09G20109,BPChr08G15860,BPChr01G16773,BPChr04G03643,BPChr14G32468,BPChr10G28357,BPChr08G03060,BPChr09G29745,BPChr05G14689,BPChr04G00445,BPChr12G08237,BPChr06G22236,	0.141083
Biological process	regulation of abscisic acid-activated signaling pathway	GO:0009787	7	0.0073923	2.0148	15	131	683	12018	BPChr03G11611,BPChr05G15017,BPChr06G32501,BPChr09G20109,BPChr08G15860,BPChr01G16773,BPChr04G03643,BPChr14G32468,BPChr10G28357,BPChr08G03060,BPChr09G29745,BPChr05G14689,BPChr04G00445,BPChr12G08237,BPChr06G22236,	0.141083
Biological process	cellular cation homeostasis	GO:0030003	8	0.00740737	1.9175	17	156	683	12018	BPChr13G17242,BPChr04G31973,BPChr09G16368,BPChr06G29512,BPChr06G30757,BPChr06G31011,BPChr02G23495,BPChr05G24306,BPChr14G12569,BPChr03G09666,BPChr03G02614,BPChr14G09178,BPChr06G30651,BPChr06G19428,BPChr06G30677,BPChr06G19479,BPChr06G09450,	0.138425
Biological process	heat acclimation	GO:0010286	6	0.00759535	2.76014	8	51	683	12018	BPChr07G15623,BPChr12G06146,BPChr12G29238,BPChr03G15693,BPChr03G13873,BPChr14G01996,BPChr13G10390,BPChr01G13794,	0.140959
Biological process	regulation of seed development	GO:0080050	7	0.00759535	2.76014	8	51	683	12018	BPunChr33213,BPChr11G01787,BPChr04G03643,BPChr07G09812,BPChr10G28357,BPChr08G27552,BPChr11G06951,BPChr04G00445,	0.140959
Biological process	red or far-red light signaling pathway	GO:0010017	8	0.00769421	3.00418	7	41	683	12018	BPChr01G26609,BPChr06G27318,BPChr09G04143,BPChr06G30794,BPChr06G29383,BPChr11G07236,BPChr11G06770,	0.140851
Biological process	oligosaccharide biosynthetic process	GO:0009312	7	0.00840041	3.29923	6	32	683	12018	BPChr11G07163,BPChr07G07722,BPChr07G07731,BPChr14G27046,BPChr14G27058,BPChr05G01341,	0.149705
Biological process	seed germination	GO:0009845	4	0.00845579	1.78639	20	197	683	12018	BPChr14G27906,BPChr05G31782,BPChr08G24774,BPChr12G25898,BPChr07G26442,BPChr13G19850,BPChr11G05795,BPChr02G18040,BPChr14G27036,BPChr01G16773,BPChr04G03643,BPChr08G05091,BPChr10G28357,BPChr01G22760,BPChr11G18733,BPChr08G27552,BPChr11G06951,BPChr08G15521,BPChr04G23775,BPChr13G03828,	0.149701
Biological process	disaccharide metabolic process	GO:0005984	7	0.00879206	2.93265	7	42	683	12018	BPChr11G07163,BPChr07G07722,BPChr07G07731,BPunChr33231,BPChr14G27046,BPChr14G27058,BPChr11G28751,	0.153633
Biological process	cell communication	GO:0007154	3	0.00933983	1.21001	131	1905	683	12018	BPChr01G26609,BPChr01G20286,BPChr14G27906,BPChr03G11611,BPChr08G24774,BPChr09G12131,BPChr06G11164,BPChr05G22418,BPChr06G02200,BPChr13G17259,BPChr06G04895,BPChr09G12112,BPChr13G17242,BPChr06G04881,BPChr06G02222,BPChr06G27318,BPChr09G04143,BPChr04G31973,BPChr11G14070,BPChr08G27623,BPChr14G27748,BPChr14G02007,BPChr11G32507,BPChr14G25321,BPChr07G26442,BPChr07G18839,BPChr09G04130,BPChr07G07722,BPChr11…	0.141199
Biological process	response to glucose	GO:0009749	8	0.00978096	2.47442	9	64	683	12018	BPChr07G18809,BPChr05G15017,BPChr11G09278,BPChr11G01725,BPChr08G27552,BPChr11G06951,BPChr05G14689,BPChr12G08237,BPChr11G09356,	0.147042
Biological process	cellular response to red or far red light	GO:0071489	7	0.0100006	2.86445	7	43	683	12018	BPChr01G26609,BPChr06G27318,BPChr09G04143,BPChr06G30794,BPChr06G29383,BPChr11G07236,BPChr11G06770,	0.149509
Biological process	cellular iron ion homeostasis	GO:0006879	11	0.0100006	2.86445	7	43	683	12018	BPChr13G17242,BPChr04G31973,BPChr06G30757,BPChr06G31011,BPChr03G02614,BPChr06G30651,BPChr06G30677,	0.149509
Biological process	glucan biosynthetic process	GO:0009250	9	0.0118295	2.17477	11	89	683	12018	BPChr05G13007,BPChr02G10571,BPChr05G12992,BPChr08G22998,BPChr11G07247,BPChr06G25448,BPChr05G26467,BPChr05G26468,BPChr02G10607,BPChr11G28737,BPChr05G22475,	0.174908
Biological process	response to UV-B	GO:0010224	7	0.0118934	2.39944	9	66	683	12018	BPChr12G24115,BPChr14G27744,BPChr11G28637,BPChr08G15858,BPChr13G04468,BPChr11G14351,BPChr11G05659,BPChr08G16408,BPChr06G11107,	0.17115
Biological process	chloroplast organization	GO:0009658	6	0.0119379	1.82397	17	164	683	12018	BPChr06G27318,BPChr14G05533,BPChr14G05457,BPChr06G31427,BPChr14G05470,BPChr02G18040,BPChr13G24696,BPChr01G16773,BPChr04G03643,BPChr04G14232,BPChr10G28357,BPChr08G16129,BPChr08G27552,BPChr11G06770,BPChr11G06951,BPChr08G24196,BPChr11G14351,	0.170878
Biological process	negative regulation of signal transduction	GO:0009968	7	0.0128015	1.71667	20	205	683	12018	BPChr03G11611,BPChr14G25321,BPChr05G15017,BPChr09G12181,BPChr06G32501,BPChr14G04160,BPChr08G13235,BPChr14G04195,BPChr04G03643,BPChr14G32468,BPChr10G28357,BPChr04G27159,BPChr08G27552,BPChr09G29745,BPChr11G06951,BPChr08G03113,BPChr05G14689,BPChr12G08237,BPChr14G01844,BPChr06G22236,	0.182268
Biological process	response to carbohydrate	GO:0009743	5	0.0132435	1.76942	18	179	683	12018	BPChr14G27906,BPChr08G24774,BPChr07G18809,BPChr13G23043,BPChr07G07722,BPChr05G15017,BPChr07G07731,BPChr11G14279,BPChr14G27046,BPChr14G27058,BPChr11G09278,BPChr07G09812,BPChr11G01725,BPChr08G27552,BPChr11G06951,BPChr05G14689,BPChr12G08237,BPChr11G09356,	0.18757
Biological process	single-organism biosynthetic process	GO:0044711	4	0.0134765	1.22367	108	1553	683	12018	BPChr12G24115,BPChr05G08770,BPChr09G29823,BPChr13G08972,BPChr11G07163,BPChr04G21907,BPChr07G09987,BPChr08G10768,BPChr07G09995,BPChr09G12112,BPChr02G19941,BPChr01G19034,BPChr05G31574,BPChr06G30722,BPChr05G07841,BPChr06G30969,BPChr14G25343,BPChr06G30700,BPChr14G27744,BPChr14G27745,BPChr07G07722,BPChr14G02019,BPChr11G28651,BPChr09G16325,BPChr07G07731,BPChr08G16209,BPChr05G08744,BPChr10G21579,BPChr11…	0.18987
Biological process	response to external biotic stimulus	GO:0043207	4	0.0136391	1.25788	87	1217	683	12018	BPChr12G24115,BPChr12G02773,BPChr12G02772,BPChr08G24774,BPChr06G02239,BPChr06G02222,BPChr02G11846,BPChr06G29502,BPChr10G21601,BPChr14G27744,BPChr08G16243,BPChr03G15132,BPChr09G04130,BPChr07G07727,BPChr05G31516,BPChr13G21921,BPChr05G15017,BPChr08G24163,BPChr10G15157,BPChr10G04257,BPChr11G14279,BPChr10G04254,BPChr06G19503,BPChr05G21087,BPChr14G27019,BPChr14G27016,BPChr02G00330,BPChr06G29324,BPChr05…	0.190171
Biological process	negative regulation of response to alcohol	GO:1901420	6	0.0136625	2.22733	10	79	683	12018	BPChr03G11611,BPChr05G15017,BPChr06G32501,BPChr04G03643,BPChr14G32468,BPChr10G28357,BPChr09G29745,BPChr05G14689,BPChr12G08237,BPChr06G22236,	0.189514
Biological process	negative regulation of cellular response to alcohol	GO:1905958	7	0.0136625	2.22733	10	79	683	12018	BPChr03G11611,BPChr05G15017,BPChr06G32501,BPChr04G03643,BPChr14G32468,BPChr10G28357,BPChr09G29745,BPChr05G14689,BPChr12G08237,BPChr06G22236,	0.189514
Biological process	negative regulation of abscisic acid-activated signaling pathway	GO:0009788	8	0.0136625	2.22733	10	79	683	12018	BPChr03G11611,BPChr05G15017,BPChr06G32501,BPChr04G03643,BPChr14G32468,BPChr10G28357,BPChr09G29745,BPChr05G14689,BPChr12G08237,BPChr06G22236,	0.189514
Biological process	response to biotic stimulus	GO:0009607	3	0.0141869	1.25582	87	1219	683	12018	BPChr12G24115,BPChr12G02773,BPChr12G02772,BPChr08G24774,BPChr06G02239,BPChr06G02222,BPChr02G11846,BPChr06G29502,BPChr10G21601,BPChr14G27744,BPChr08G16243,BPChr03G15132,BPChr09G04130,BPChr07G07727,BPChr05G31516,BPChr13G21921,BPChr05G15017,BPChr08G24163,BPChr10G15157,BPChr10G04257,BPChr11G14279,BPChr10G04254,BPChr06G19503,BPChr05G21087,BPChr14G27019,BPChr14G27016,BPChr02G00330,BPChr06G29324,BPChr05…	0.193792
Biological process	transition metal ion homeostasis	GO:0055076	9	0.014381	1.97195	13	116	683	12018	BPChr13G17242,BPChr04G31973,BPChr09G16368,BPChr13G21921,BPChr06G29512,BPChr06G30757,BPChr06G31011,BPChr02G23495,BPChr03G02614,BPChr14G09178,BPChr06G30651,BPChr06G30677,BPChr06G09450,	0.195451
Biological process	regulation of circadian rhythm	GO:0042752	4	0.0146449	2.4696	8	57	683	12018	BPChr10G28244,BPunChr33213,BPChr06G30794,BPChr11G01787,BPChr10G28308,BPChr03G09666,BPChr14G02754,BPChr11G14351,	0.198037
Biological process	cell cycle G2/M phase transition	GO:0044839	5	0.0149056	2.93265	6	36	683	12018	BPChr10G28244,BPChr11G14070,BPChr11G09278,BPChr10G28308,BPChr06G26129,BPChr11G09356,	0.200555
Biological process	regulation of transcription, DNA-templated	GO:0006355	10	0.0152176	1.21166	113	1641	683	12018	BPChr12G24115,BPChr10G06611,BPChr14G27906,BPChr03G11611,BPChr06G02213,BPChr13G17262,BPChr12G25898,BPChr12G25899,BPChr13G17251,BPChr09G01223,BPChr06G27318,BPChr10G28244,BPChr04G31973,BPChr06G30955,BPChr11G05795,BPChr05G15017,BPChr08G24163,BPChr04G27261,BPChr06G29517,BPChr05G31734,BPChr09G20109,BPChr08G28436,BPunChr33213,BPChr12G28189,BPChr11G28637,BPunChr33688,BPChr06G31400,BPChr06G19535,BPChr05G0…	0.203734
Biological process	regulation of post-embryonic development	GO:0048580	6	0.0152726	1.48129	33	392	683	12018	BPChr02G13174,BPChr14G27906,BPChr02G13192,BPChr08G24774,BPChr12G25898,BPChr06G27318,BPChr09G04143,BPChr13G19850,BPChr11G05795,BPChr08G28436,BPunChr33213,BPChr11G28637,BPChr06G30794,BPChr10G21792,BPChr13G24696,BPChr11G01787,BPChr11G03746,BPChr01G16773,BPChr04G03643,BPChr07G09812,BPChr09G29729,BPChr03G09666,BPChr08G17028,BPChr10G28357,BPChr11G18733,BPChr08G27552,BPChr11G06770,BPChr06G16581,BPChr11G…	0.203458
Biological process	response to jasmonic acid	GO:0009753	6	0.0154566	1.56676	26	292	683	12018	BPChr07G18868,BPChr04G27261,BPChr06G29517,BPChr06G19503,BPChr11G15545,BPChr05G22399,BPChr08G16723,BPChr14G09139,BPChr06G21280,BPChr08G17078,BPChr11G07023,BPChr11G01725,BPChr03G10890,BPChr14G02754,BPChr03G29004,BPChr11G18733,BPChr04G27159,BPChr06G16592,BPChr03G10841,BPChr06G16581,BPChr11G05659,BPChr02G23513,BPChr04G00445,BPChr05G22440,BPChr14G01859,BPChr01G13794,	0.204895
Biological process	plastid membrane organization	GO:0009668	6	0.0169607	2.85339	6	37	683	12018	BPChr14G05533,BPChr14G05457,BPChr14G05470,BPChr10G03450,BPChr11G05883,BPChr13G10361,	0.221559
Biological process	negative regulation of cell communication	GO:0010648	6	0.0170992	1.66786	20	211	683	12018	BPChr03G11611,BPChr14G25321,BPChr05G15017,BPChr09G12181,BPChr06G32501,BPChr14G04160,BPChr08G13235,BPChr14G04195,BPChr04G03643,BPChr14G32468,BPChr10G28357,BPChr04G27159,BPChr08G27552,BPChr09G29745,BPChr11G06951,BPChr08G03113,BPChr05G14689,BPChr12G08237,BPChr14G01844,BPChr06G22236,	0.22229
Biological process	negative regulation of signaling	GO:0023057	5	0.0170992	1.66786	20	211	683	12018	BPChr03G11611,BPChr14G25321,BPChr05G15017,BPChr09G12181,BPChr06G32501,BPChr14G04160,BPChr08G13235,BPChr14G04195,BPChr04G03643,BPChr14G32468,BPChr10G28357,BPChr04G27159,BPChr08G27552,BPChr09G29745,BPChr11G06951,BPChr08G03113,BPChr05G14689,BPChr12G08237,BPChr14G01844,BPChr06G22236,	0.22229
Biological process	response to other organism	GO:0051707	5	0.0171964	1.24752	86	1213	683	12018	BPChr12G24115,BPChr12G02773,BPChr12G02772,BPChr08G24774,BPChr06G02239,BPChr06G02222,BPChr02G11846,BPChr06G29502,BPChr10G21601,BPChr14G27744,BPChr08G16243,BPChr03G15132,BPChr09G04130,BPChr07G07727,BPChr05G31516,BPChr13G21921,BPChr05G15017,BPChr08G24163,BPChr10G15157,BPChr10G04257,BPChr11G14279,BPChr10G04254,BPChr06G19503,BPChr05G21087,BPChr14G27019,BPChr14G27016,BPChr02G00330,BPChr06G29324,BPChr05…	0.221414
Biological process	response to wounding	GO:0009611	4	0.0172542	1.53751	27	309	683	12018	BPChr03G11611,BPChr08G10768,BPChr06G02239,BPChr09G01223,BPChr02G18017,BPChr11G05795,BPChr11G14279,BPChr11G15545,BPChr14G27019,BPChr05G22399,BPChr12G26827,BPChr11G07023,BPChr11G01725,BPChr03G10890,BPChr06G13478,BPChr09G04020,BPChr09G04037,BPChr03G29004,BPChr06G25289,BPChr09G29745,BPChr03G10841,BPChr03G15105,BPChr02G23513,BPChr05G22440,BPChr06G29277,BPChr11G10160,BPChr06G11107,	0.2211
Biological process	response to salicylic acid	GO:0009751	6	0.0173334	1.64228	21	225	683	12018	BPChr06G02222,BPChr08G24163,BPChr07G18868,BPChr06G29517,BPChr06G19503,BPChr08G16723,BPChr08G17078,BPChr03G10890,BPChr14G02754,BPChr02G20802,BPChr06G02126,BPChr08G26672,BPChr03G29004,BPChr06G25289,BPChr11G18733,BPChr03G10841,BPChr06G16581,BPChr05G14646,BPChr11G05659,BPChr04G00445,BPChr14G01859,	0.221062
Biological process	leaf senescence	GO:0010150	6	0.0177133	1.78186	16	158	683	12018	BPChr13G19850,BPChr11G05795,BPChr08G24163,BPChr11G14279,BPunChr33213,BPChr08G16994,BPChr13G24696,BPChr11G01787,BPChr04G03643,BPChr06G11023,BPChr06G11046,BPChr14G12338,BPChr06G13478,BPChr10G28357,BPChr09G29745,BPChr13G10339,	0.224843
Biological process	regulation of RNA biosynthetic process	GO:2001141	8	0.0179021	1.20332	114	1667	683	12018	BPChr12G24115,BPChr10G06611,BPChr14G27906,BPChr03G11611,BPChr06G02213,BPChr13G17262,BPChr12G25898,BPChr12G25899,BPChr13G17251,BPChr09G01223,BPChr06G27318,BPChr10G28244,BPChr04G31973,BPChr06G30955,BPChr11G05795,BPChr05G15017,BPChr08G24163,BPChr04G27261,BPChr06G29517,BPChr05G31734,BPChr09G20109,BPChr08G28436,BPunChr33213,BPChr12G28189,BPChr11G28637,BPunChr33688,BPChr06G31400,BPChr06G19535,BPChr05G0…	0.226172
Biological process	regulation of nucleic acid-templated transcription	GO:1903506	9	0.0179021	1.20332	114	1667	683	12018	BPChr12G24115,BPChr10G06611,BPChr14G27906,BPChr03G11611,BPChr06G02213,BPChr13G17262,BPChr12G25898,BPChr12G25899,BPChr13G17251,BPChr09G01223,BPChr06G27318,BPChr10G28244,BPChr04G31973,BPChr06G30955,BPChr11G05795,BPChr05G15017,BPChr08G24163,BPChr04G27261,BPChr06G29517,BPChr05G31734,BPChr09G20109,BPChr08G28436,BPunChr33213,BPChr12G28189,BPChr11G28637,BPunChr33688,BPChr06G31400,BPChr06G19535,BPChr05G0…	0.226172
Biological process	response to nutrient levels	GO:0031667	5	0.0183031	1.59333	23	254	683	12018	BPChr08G24774,BPChr09G12131,BPChr13G17242,BPChr04G31973,BPChr08G16209,BPChr08G01291,BPChr11G09278,BPChr10G03515,BPChr06G31245,BPChr03G09666,BPChr06G31082,BPChr06G13478,BPChr12G25179,BPChr03G15061,BPChr08G13298,BPChr06G19428,BPChr09G08313,BPChr01G26470,BPChr08G20423,BPChr06G19479,BPChr11G09356,BPChr07G32009,BPChr07G02855,	0.220869
Biological process	cellular response to hypoxia	GO:0071456	7	0.0193204	3.14213	5	28	683	12018	BPChr09G04130,BPChr14G20652,BPChr03G15693,BPChr14G01996,BPChr11G20484,	0.232103
Biological process	sterol biosynthetic process	GO:0016126	7	0.0193204	3.14213	5	28	683	12018	BPChr05G22399,BPChr01G16944,BPChr13G04462,BPChr05G22440,BPChr07G30020,	0.232103
Biological process	negative regulation of intracellular signal transduction	GO:1902532	8	0.019905	2.5137	7	49	683	12018	BPChr09G12181,BPChr14G04160,BPChr08G13235,BPChr14G04195,BPChr04G27159,BPChr08G03113,BPChr14G01844,	0.23701
Biological process	multi-organism process	GO:0051704	2	0.0201641	1.19924	113	1658	683	12018	BPChr12G24115,BPChr12G02773,BPChr12G02772,BPChr08G24774,BPChr06G02239,BPChr06G02222,BPChr02G11846,BPChr06G29502,BPChr10G21601,BPChr08G27623,BPChr09G20616,BPChr06G30944,BPChr14G27744,BPChr11G32507,BPChr08G16243,BPChr03G15132,BPChr09G04130,BPChr07G07727,BPChr05G31516,BPChr13G21921,BPChr05G15017,BPChr08G24163,BPChr10G15157,BPChr10G04257,BPChr11G14279,BPChr10G04254,BPChr06G19503,BPChr05G21087,BPChr14…	0.239038
Biological process	seedling development	GO:0090351	5	0.0205404	1.63683	20	215	683	12018	BPChr14G27906,BPChr05G31782,BPChr08G24774,BPChr12G25898,BPChr07G26442,BPChr13G19850,BPChr11G05795,BPChr02G18040,BPChr14G27036,BPChr01G16773,BPChr04G03643,BPChr08G05091,BPChr10G28357,BPChr01G22760,BPChr11G18733,BPChr08G27552,BPChr11G06951,BPChr08G15521,BPChr04G23775,BPChr13G03828,	0.240322
Biological process	cellular chemical homeostasis	GO:0055082	6	0.021479	1.62925	20	216	683	12018	BPChr13G17242,BPChr04G31973,BPChr09G16368,BPChr06G29512,BPChr06G30757,BPChr06G31011,BPChr02G23495,BPChr05G24306,BPChr08G05091,BPChr14G12569,BPChr03G09666,BPChr03G02614,BPChr14G09178,BPChr06G30651,BPChr08G27552,BPChr11G06951,BPChr06G19428,BPChr06G30677,BPChr06G19479,BPChr06G09450,	0.242857
Biological process	male meiotic nuclear division	GO:0007140	8	0.0222855	3.03378	5	29	683	12018	BPChr08G27623,BPChr11G32507,BPunChr33921,BPChr13G02556,BPChr12G25802,	0.250922
Biological process	cellular response to acid chemical	GO:0071229	5	0.0234206	1.36329	43	555	683	12018	BPChr14G27906,BPChr03G11611,BPChr09G12112,BPChr03G18211,BPChr14G25321,BPChr07G26442,BPChr07G18839,BPChr05G15017,BPChr07G18868,BPChr11G14279,BPChr05G15029,BPChr06G32501,BPChr09G20109,BPChr05G22199,BPChr08G15860,BPChr01G16773,BPChr04G03643,BPChr14G32468,BPChr07G09812,BPChr14G09139,BPChr06G21280,BPChr11G07023,BPChr07G18926,BPChr10G28357,BPChr08G03060,BPChr05G26468,BPChr04G27159,BPChr08G27552,BPChr09…	0.262603
Biological process	monovalent inorganic cation transport	GO:0015672	7	0.0234551	1.6143	20	218	683	12018	BPChr13G08972,BPChr09G04737,BPChr05G26589,BPChr09G20604,BPChr13G21921,BPChr09G20572,BPChr10G21775,BPChr05G24306,BPChr14G12569,BPChr14G09178,BPChr01G32530,BPChr11G14345,BPChr11G05885,BPChr13G10374,BPChr08G15786,BPChr08G15779,BPChr06G09433,BPChr07G24804,BPChr06G09450,BPChr13G10339,	0.261899
Biological process	regulation of seed germination	GO:0010029	8	0.0245996	1.9551	11	99	683	12018	BPChr14G27906,BPChr08G24774,BPChr12G25898,BPChr13G19850,BPChr11G05795,BPChr01G16773,BPChr04G03643,BPChr10G28357,BPChr08G27552,BPChr11G06951,BPChr13G03828,	0.273544
Biological process	organic cyclic compound biosynthetic process	GO:1901362	5	0.024755	1.14959	160	2449	683	12018	BPChr12G24115,BPChr10G06611,BPChr14G27906,BPChr09G29823,BPChr13G08972,BPChr03G11611,BPChr06G02213,BPChr13G17262,BPChr07G09987,BPChr12G25898,BPChr08G10768,BPChr12G25899,BPChr07G09995,BPChr13G17251,BPChr09G01223,BPChr01G19034,BPChr05G31574,BPChr06G27318,BPChr06G30969,BPChr10G28244,BPChr04G31973,BPChr11G14070,BPChr14G27745,BPChr06G30955,BPChr11G05795,BPChr14G02019,BPChr09G16325,BPChr05G15017,BPChr08…	0.274139
Biological process	regulation of gibberellic acid mediated signaling pathway	GO:0009937	7	0.0255305	2.93265	5	30	683	12018	BPChr04G03643,BPChr10G28357,BPChr08G27552,BPChr11G06951,BPChr05G01341,	0.281568
Biological process	inorganic ion transmembrane transport	GO:0098660	7	0.0263447	1.42911	32	394	683	12018	BPChr13G08972,BPChr09G12131,BPChr08G10764,BPChr09G04737,BPChr05G26589,BPChr09G20604,BPChr07G18839,BPChr03G07585,BPChr13G21921,BPChr10G04257,BPChr10G04254,BPChr08G16209,BPChr09G20572,BPChr10G21775,BPChr06G08456,BPChr05G24306,BPChr10G04312,BPChr03G02614,BPChr14G09178,BPChr10G03450,BPChr07G18926,BPChr08G13298,BPChr11G14345,BPChr06G19428,BPChr11G05885,BPChr13G10374,BPChr08G15786,BPChr06G09433,BPChr07…	0.289361
Biological process	aging	GO:0007568	4	0.0264108	1.64107	18	193	683	12018	BPChr13G19850,BPChr11G05795,BPChr08G24163,BPChr11G14279,BPunChr33213,BPChr08G16994,BPChr13G24696,BPChr11G01787,BPChr04G03643,BPChr06G11023,BPChr06G11046,BPChr14G12338,BPChr06G13478,BPChr10G28357,BPChr08G27552,BPChr09G29745,BPChr11G06951,BPChr13G10339,	0.288909
Biological process	defense response to fungus, incompatible interaction	GO:0009817	8	0.0268082	2.36868	7	52	683	12018	BPChr06G02239,BPChr06G29502,BPChr06G29324,BPChr02G11870,BPChr06G11023,BPChr06G11046,BPChr05G31605,	0.292069
Biological process	regulation of reproductive process	GO:2000241	4	0.0295701	1.46633	27	324	683	12018	BPChr02G13174,BPChr02G13192,BPChr06G27318,BPChr08G28436,BPunChr33213,BPChr11G28637,BPChr06G30794,BPChr10G21792,BPChr13G24696,BPChr11G01787,BPChr11G03746,BPChr04G03643,BPChr07G09812,BPChr09G29729,BPChr08G17028,BPChr10G28357,BPChr07G18942,BPChr11G18733,BPChr08G27552,BPChr11G06770,BPChr06G16581,BPChr11G06951,BPChr05G01341,BPChr08G28562,BPChr05G14657,BPChr04G00445,BPChr12G25802,	0.308423
Biological process	nucleobase-containing compound biosynthetic process	GO:0034654	6	0.0311003	1.16241	131	1983	683	12018	BPChr12G24115,BPChr10G06611,BPChr14G27906,BPChr13G08972,BPChr03G11611,BPChr06G02213,BPChr13G17262,BPChr12G25898,BPChr12G25899,BPChr07G09995,BPChr13G17251,BPChr09G01223,BPChr05G31574,BPChr06G27318,BPChr10G28244,BPChr04G31973,BPChr11G14070,BPChr14G27745,BPChr06G30955,BPChr11G05795,BPChr09G16325,BPChr05G15017,BPChr08G24163,BPChr04G27261,BPChr06G29517,BPChr05G31734,BPChr01G17200,BPChr09G20109,BPChr12…	0.323131
Biological process	lipid biosynthetic process	GO:0008610	5	0.0313691	1.36458	38	490	683	12018	BPChr09G29823,BPChr04G21907,BPChr07G09987,BPChr09G12112,BPChr01G19034,BPChr05G07841,BPChr14G25343,BPChr11G28651,BPChr10G21579,BPChr01G22810,BPChr05G22399,BPChr11G28636,BPChr14G20652,BPChr04G18053,BPChr04G18051,BPChr04G18049,BPChr06G21435,BPChr05G24311,BPChr01G16944,BPunChr33412,BPChr14G09139,BPChr06G21280,BPChr06G08062,BPChr09G14463,BPChr11G20484,BPChr01G24983,BPChr13G07716,BPChr04G16011,BPChr03G…	0.32467
Biological process	G2/M transition of mitotic cell cycle	GO:0000086	6	0.0328894	2.74936	5	32	683	12018	BPChr10G28244,BPChr11G09278,BPChr10G28308,BPChr06G26129,BPChr11G09356,	0.339101
Biological process	regulation of RNA metabolic process	GO:0051252	7	0.0333663	1.17108	118	1773	683	12018	BPChr12G24115,BPChr10G06611,BPChr14G27906,BPChr03G11611,BPChr06G02213,BPChr13G17262,BPChr12G25898,BPChr12G25899,BPChr13G17251,BPChr09G01223,BPChr06G27318,BPChr10G28244,BPChr04G31973,BPChr06G30955,BPChr11G05795,BPChr05G15017,BPChr08G24163,BPChr04G27261,BPChr06G29517,BPChr11G14274,BPChr05G31734,BPChr06G29578,BPChr05G04729,BPChr09G20109,BPChr08G28436,BPunChr33213,BPChr12G28189,BPChr11G28637,BPunChr3…	0.342705
Biological process	heterocycle biosynthetic process	GO:0018130	5	0.0336325	1.14912	144	2205	683	12018	BPChr12G24115,BPChr10G06611,BPChr14G27906,BPChr13G08972,BPChr03G11611,BPChr06G02213,BPChr13G17262,BPChr12G25898,BPChr12G25899,BPChr07G09995,BPChr13G17251,BPChr09G01223,BPChr01G19034,BPChr05G31574,BPChr06G27318,BPChr06G30969,BPChr10G28244,BPChr04G31973,BPChr11G14070,BPChr14G27745,BPChr06G30955,BPChr11G05795,BPChr14G02019,BPChr09G16325,BPChr05G15017,BPChr08G24163,BPChr04G27261,BPChr06G29517,BPChr05…	0.344125
Biological process	metal ion homeostasis	GO:0055065	8	0.0343974	1.59159	18	199	683	12018	BPChr13G17242,BPChr04G31973,BPChr09G16368,BPChr13G21921,BPChr06G29512,BPChr06G30757,BPChr06G31011,BPChr02G23495,BPChr05G24306,BPChr14G12569,BPChr03G09666,BPChr03G02614,BPChr14G09178,BPChr10G03450,BPChr06G30651,BPChr06G30677,BPChr06G09450,BPChr13G10339,	0.344101
Biological process	ion homeostasis	GO:0050801	6	0.0345529	1.45699	26	314	683	12018	BPChr11G07106,BPChr13G17242,BPChr04G31973,BPChr09G16368,BPChr09G29664,BPChr13G21921,BPChr06G29512,BPChr06G30757,BPChr06G31011,BPChr02G23495,BPChr01G16773,BPChr05G24306,BPChr08G05091,BPChr14G12569,BPChr03G09666,BPChr03G02614,BPChr14G09178,BPChr10G03450,BPChr06G30651,BPChr06G19428,BPChr06G30677,BPChr08G15779,BPChr06G19479,BPChr06G09450,BPChr14G01844,BPChr13G10339,	0.344377
Biological process	cellular response to phosphate starvation	GO:0016036	8	0.0353734	2.101	8	67	683	12018	BPChr08G24774,BPChr09G12131,BPChr13G17242,BPChr08G16209,BPChr03G15061,BPChr08G13298,BPChr08G20423,BPChr07G32009,	0.351254
Biological process	regulation of seedling development	GO:1900140	7	0.0359369	1.84338	11	105	683	12018	BPChr14G27906,BPChr08G24774,BPChr12G25898,BPChr13G19850,BPChr11G05795,BPChr01G16773,BPChr04G03643,BPChr10G28357,BPChr08G27552,BPChr11G06951,BPChr13G03828,	0.355537
Biological process	response to blue light	GO:0009637	6	0.0371566	1.97954	9	80	683	12018	BPChr06G27318,BPChr08G28436,BPChr01G16773,BPChr03G09666,BPChr08G24196,BPChr08G28562,BPChr06G29443,BPChr05G14657,BPChr11G17836,	0.366258
Biological process	response to hexose	GO:0009746	7	0.0371566	1.97954	9	80	683	12018	BPChr07G18809,BPChr05G15017,BPChr11G09278,BPChr11G01725,BPChr08G27552,BPChr11G06951,BPChr05G14689,BPChr12G08237,BPChr11G09356,	0.366258
Biological process	response to cold	GO:0009409	5	0.0377503	1.39507	31	391	683	12018	BPChr14G27906,BPChr12G25898,BPChr08G10768,BPChr12G25899,BPChr09G01223,BPChr13G23043,BPChr02G18017,BPChr10G21801,BPChr11G14279,BPChr05G21062,BPChr06G31438,BPChr08G16723,BPChr05G22199,BPChr05G13007,BPChr11G12210,BPChr05G12992,BPChr01G16942,BPChr08G20378,BPChr11G01725,BPChr09G29923,BPChr08G25542,BPChr06G29625,BPChr05G26467,BPChr05G26468,BPChr08G26672,BPChr09G29745,BPChr08G15521,BPChr04G00445,BPChr11…	0.369404
Biological process	potassium ion transmembrane transport	GO:0071805	10	0.0379814	1.89203	10	93	683	12018	BPChr09G04737,BPChr05G26589,BPChr13G21921,BPChr10G21775,BPChr05G24306,BPChr11G05885,BPChr13G10374,BPChr06G09433,BPChr07G24804,BPChr13G10339,	0.370319
Biological process	cellular potassium ion transport	GO:0071804	9	0.0379814	1.89203	10	93	683	12018	BPChr09G04737,BPChr05G26589,BPChr13G21921,BPChr10G21775,BPChr05G24306,BPChr11G05885,BPChr13G10374,BPChr06G09433,BPChr07G24804,BPChr13G10339,	0.370319
Biological process	cellular hormone metabolic process	GO:0034754	6	0.0383196	2.19949	7	56	683	12018	BPChr01G22888,BPChr11G15545,BPChr12G06138,BPChr04G24488,BPChr11G17617,BPChr02G23312,BPChr11G17833,	0.370928
Biological process	RNA biosynthetic process	GO:0032774	8	0.0387481	1.16509	117	1767	683	12018	BPChr12G24115,BPChr10G06611,BPChr14G27906,BPChr03G11611,BPChr06G02213,BPChr13G17262,BPChr12G25898,BPChr12G25899,BPChr13G17251,BPChr09G01223,BPChr06G27318,BPChr10G28244,BPChr04G31973,BPChr06G30955,BPChr11G05795,BPChr05G15017,BPChr08G24163,BPChr04G27261,BPChr06G29517,BPChr05G31734,BPChr01G17200,BPChr09G20109,BPChr08G28436,BPunChr33213,BPChr12G28189,BPChr11G28637,BPunChr33688,BPChr06G31400,BPChr06G1…	0.364585
Biological process	oligosaccharide metabolic process	GO:0009311	6	0.0397878	1.9551	9	81	683	12018	BPChr11G07163,BPChr07G07722,BPChr07G07731,BPunChr33231,BPChr14G27046,BPChr14G27058,BPChr12G25764,BPChr05G01341,BPChr11G28751,	0.373063
Biological process	defense response to bacterium, incompatible interaction	GO:0009816	8	0.0411307	2.0401	8	69	683	12018	BPChr10G21601,BPChr08G16243,BPChr05G31516,BPChr08G24163,BPChr02G11870,BPChr06G31245,BPChr06G31082,BPChr02G25954,	0.384315
Biological process	steroid biosynthetic process	GO:0006694	6	0.0411307	2.0401	8	69	683	12018	BPChr09G29823,BPChr07G09987,BPChr05G22399,BPChr01G16944,BPChr06G21280,BPChr13G04462,BPChr05G22440,BPChr07G30020,	0.384315
Biological process	response to monosaccharide	GO:0034284	6	0.0425426	1.93126	9	82	683	12018	BPChr07G18809,BPChr05G15017,BPChr11G09278,BPChr11G01725,BPChr08G27552,BPChr11G06951,BPChr05G14689,BPChr12G08237,BPChr11G09356,	0.380339
Biological process	isoprenoid biosynthetic process	GO:0008299	7	0.0429893	1.51038	20	233	683	12018	BPChr04G21907,BPChr09G12112,BPChr05G07841,BPChr14G25343,BPChr11G28651,BPChr10G21579,BPChr11G28636,BPChr14G20652,BPChr04G18053,BPChr04G18051,BPChr04G18049,BPChr01G16944,BPunChr33412,BPChr06G08062,BPChr11G20484,BPChr13G07716,BPChr04G16011,BPChr04G00445,BPChr13G10361,BPChr06G08169,	0.38306
Biological process	cytokinin-activated signaling pathway	GO:0009736	7	0.0442296	2.01096	8	70	683	12018	BPChr08G24774,BPunChr33213,BPChr11G01787,BPChr03G09664,BPChr10G15897,BPChr11G07236,BPChr08G27552,BPChr11G06951,	0.392811
Biological process	carbohydrate mediated signaling	GO:0009756	6	0.0442296	2.01096	8	70	683	12018	BPChr14G27906,BPChr07G07722,BPChr07G07731,BPChr14G27046,BPChr14G27058,BPChr07G09812,BPChr08G27552,BPChr11G06951,	0.392811
Biological process	sugar mediated signaling pathway	GO:0010182	7	0.0442296	2.01096	8	70	683	12018	BPChr14G27906,BPChr07G07722,BPChr07G07731,BPChr14G27046,BPChr14G27058,BPChr07G09812,BPChr08G27552,BPChr11G06951,	0.392811
Biological process	cellular response to oxygen-containing compound	GO:1901701	5	0.0454945	1.25365	56	786	683	12018	BPChr14G27906,BPChr03G11611,BPChr08G24774,BPChr09G12112,BPChr13G17242,BPChr06G02222,BPChr06G30722,BPChr03G18211,BPChr14G25321,BPChr07G26442,BPChr07G18839,BPChr07G07722,BPChr05G15017,BPChr07G07731,BPChr07G18868,BPChr11G14279,BPChr05G15029,BPChr06G32501,BPChr09G20109,BPChr01G31956,BPChr14G27046,BPChr01G31966,BPChr14G27058,BPChr05G22199,BPChr08G15860,BPChr01G16773,BPChr04G03643,BPChr14G32468,BPChr07…	0.398781
Biological process	steroid metabolic process	GO:0008202	5	0.045526	1.68196	13	136	683	12018	BPChr09G29823,BPChr07G09987,BPChr14G27744,BPChr09G17892,BPChr05G22399,BPChr04G18051,BPChr04G18049,BPChr01G16944,BPChr06G21280,BPChr13G04462,BPChr10G19353,BPChr05G22440,BPChr07G30020,	0.397761
Biological process	regulation of nucleobase-containing compound metabolic process	GO:0019219	6	0.0469611	1.15166	122	1864	683	12018	BPChr12G24115,BPChr10G06611,BPChr14G27906,BPChr03G11611,BPChr06G02213,BPChr13G17262,BPChr12G25898,BPChr12G25899,BPChr13G17251,BPChr09G01223,BPChr06G27318,BPChr10G28244,BPChr04G31973,BPChr06G30955,BPChr11G05795,BPChr05G15017,BPChr08G24163,BPChr04G27261,BPChr06G29517,BPChr11G14274,BPChr05G31734,BPChr06G29578,BPChr05G04729,BPChr09G20109,BPChr08G28436,BPunChr33213,BPChr12G28189,BPChr11G28637,BPunChr3…	0.408971
Biological process	cellular response to cytokinin stimulus	GO:0071368	7	0.0474783	1.98264	8	71	683	12018	BPChr08G24774,BPunChr33213,BPChr11G01787,BPChr03G09664,BPChr10G15897,BPChr11G07236,BPChr08G27552,BPChr11G06951,	0.412142
Biological process	transcription, DNA-templated	GO:0006351	10	0.0480877	1.15749	114	1733	683	12018	BPChr12G24115,BPChr10G06611,BPChr14G27906,BPChr03G11611,BPChr06G02213,BPChr13G17262,BPChr12G25898,BPChr12G25899,BPChr13G17251,BPChr09G01223,BPChr06G27318,BPChr10G28244,BPChr04G31973,BPChr06G30955,BPChr11G05795,BPChr05G15017,BPChr08G24163,BPChr04G27261,BPChr06G29517,BPChr05G31734,BPChr09G20109,BPChr08G28436,BPunChr33213,BPChr12G28189,BPChr11G28637,BPunChr33688,BPChr06G31400,BPChr06G19535,BPChr05G0…	0.41609
